# Supplementary material for: From Cellular Characteristics to Disease Diagnosis: Uncovering Phenotypes with Supercells
Source: PLoS Comput Biol. 2013 Sep 5;9(9):e1003215. doi: 10.1371/journal.pcbi.1003215 (PMC3763994; doi:10.1371/journal.pcbi.1003215)
Supplement: Dataset S2 — Multicolor flow cytometry (all cells) from 22 patients labeled according to disease type or healthy status for a randomized single-cell subsample and for the different supercell sizes used in this paper. (XLS) [file pcbi.1003215.s002.xls]

## Sheet: Export Summary
	This document was exported from Numbers. Each table was converted to an Excel worksheet. All other objects on each Numbers sheet were placed on separate worksheets. Please be aware that formula calculations may differ in Excel.
	Numbers Sheet Name	Numbers Table Name	Excel Worksheet Name
	Sheet 1
		Table 2	Sheet 1 - Table 2

## Sheet: Sheet 1 - Table 2
FSC	SSC	IL23R	CD196	CD4	Viability	CD8	CD27	CD45	IL17A	CD197	CD3	IL22	CD62L	CD161	TNFA
Single Cells
Patient 1: Healthy
65467.1	72517.1	211.15	1135.06	243.8	382.66	1261.4	714.44	1158.58	908.82	436.59	734.67	3161.92	1817.12	1708.06	2095.1
122228	46729	217.33	1133	4300.42	860.72	947.64	12407.3	2927.72	6156	1406.97	7658.55	2755.2	2701.08	6151.64	1669.52
100467	140126	304.88	1514.1	1590	1121.48	992.16	668.86	4031.18	465.75	882.09	1615.14	6236.92	2788.82	1102.9	2370.62
67158.8	63051.4	135.96	899.19	240.62	355.1	2952.1	10388	1549.72	4549.77	926.64	5873.31	2121.34	2016.38	4475.56	939.72
76119.1	133380	262.65	2238.19	650.84	843.76	1071.66	595.72	3094.14	308.61	660.96	1681.56	5071.7	5990.92	2737.98	3087.3
82884.5	36050	136.99	607.7	244.86	312.7	301.04	77.38	1117.24	77.76	275.4	872.37	1493.22	597.78	327.18	818.36
86328.5	99505.2	318.27	869.32	510.92	503.5	705.96	405.98	1901.64	225.18	488.43	1217.43	5521.06	2595.3	841.32	1952.42
40404.8	99361	268.83	8142.15	455.8	438.84	3041.14	1537	1833.8	509.49	1167.21	1016.55	8983.1	30914	13156.9	10195.9
127746	156554	472.77	1856.06	1911.18	5944.48	3496.94	1208.4	2655.3	415.53	6147.09	3519.45	4232.02	3123.38	1122.58	3643.26
110481	134426	424.36	2120.77	1241.26	753.66	1127.84	453.68	3289.18	406.62	754.11	1551.96	5648.98	5270.96	2206.62	3093.04
83963	57171.2	94.76	5014.04	121.9	238.5	1142.68	859.66	3108.98	318.33	1020.6	1227.15	4229.56	14578	6664.14	5753.12
173805	180745	594.31	6495.18	1186.14	2831.26	7887.46	13957	4724.42	5998.05	3026.16	6695.46	9074.94	25047.7	15460.3	9263.54
4783.8	6461.19	0	111.24	56.18	345.56	216.24	14.84	73.14	-2.76	160.38	-56.49	332.92	134.48	165.64	295.2
55070.4	44463	135.96	708.64	218.36	193.98	2041.56	7354.28	2413.62	2924.1	1460.43	6614.46	1469.44	1481.74	3766.26	900.36
109934	53821.6	269.86	5220.04	244.86	346.62	1934.5	1050.46	457.92	95.58	417.96	463.32	4666.62	20444.2	9205.32	6892.92
87209.6	45133.6	181.28	1027.94	3421.68	819.38	1026.08	10699.6	4108.56	4315.68	663.39	4787.91	3589.14	1793.34	5453	1590.8
8610	3643.11	36.05	136.99	23.32	-8.46	-10.34	-18.92	-235.62	-122.07	-39.5	-101.13	62.32	-0.36	27.06	137.76
90884.6	33975.6	149.35	1891.08	4001.5	870.26	939.16	11060	4343.88	5405.94	1062.72	6162.48	1970.46	984	6566.56	2432.12
11485.3	3991.25	3.09	147.29	110.24	82.68	112.36	-10.34	56.18	179.01	70.47	132.03	187.78	150.06	49.2	250.92
102058	39725	155.53	2195.96	3312.5	984.74	1189.32	5389.04	3085.66	2898.18	612.36	8548.74	2346.84	7680.94	5208.64	2608.42
118107	135288	401.7	2981.85	999.58	1235.96	1315.46	652.96	2747.52	499.77	1711.53	1981.26	6809.28	9690.76	3799.06	5079.9
115269	45864.9	160.68	1714.95	139.92	246.98	4604.64	8972.9	2362.74	3420.63	977.67	5213.97	2785.54	6362.38	5386.58	1961.44
10461.4	13168.5	18.54	169.95	-12.22	42.4	-25.5	-39.72	9.54	138.51	63.18	80.19	725.7	209.92	-31.2	492
74800.3	67300.2	149.35	2321.62	312.7	241.68	926.44	215.18	1225.36	183.87	344.25	858.6	3847.44	7557.12	3307.06	3048.76
64865.6	60820.5	220.42	898.16	212	360.4	1347.26	599.96	2168.76	396.9	174.96	3234.33	2355.04	4261.54	1703.96	1525.2
83924.4	47118.4	127.72	1894.17	3905.04	785.46	1229.6	14015.3	3726.96	5460.21	985.77	6400.62	2446.06	4828.98	7247.98	2099.2
81957.1	60741.2	303.85	4044.81	4460.48	1287.9	2562.02	19844.3	5048.78	7562.16	1176.12	8140.5	5737.54	14812.5	13853.9	5768.7
5105.52	4958.42	18.54	89.61	31.8	-21.74	25.44	131.44	-5.64	-40.69	-20.94	40.5	-67.12	9.02	85.28	46.74
134096	111598	441.87	6926.75	1196.74	670.98	2558.84	1295.32	1879.38	260.82	558.9	725.76	7126.62	26067	11803.9	9029.84
10339.6	6284.03	18.54	19.57	-100.24	89.04	79.5	37.1	-188.26	-26.46	-30.41	56.7	204.18	68.06	100.86	177.12
132707	122555	349.17	2088.84	745.18	712.32	1075.9	465.34	2449.66	402.57	775.98	1185.03	5204.54	6145.08	2440.32	3132.4
5946.36	3752.29	-0.97	20.6	121.9	-4.7	-67.1	-58.64	-36.9	-114.17	-92.85	-143.01	63.14	90.2	-22.22	117.26
52087.6	45291.2	113.3	674.65	2922.42	530	569.22	11857.2	1708.72	5126.49	1368.9	5561.46	714.22	653.54	5269.32	520.7
26332.3	139203	199.82	1278.23	418.7	633.88	760.02	502.44	1104.52	295.65	359.64	627.75	5088.1	3739.2	1638.36	2372.26
94426.1	53699.1	201.88	1903.44	144.16	364.64	202.46	336.02	1142.68	1435.32	856.98	799.47	2035.24	810.16	4100	3243.92
109686	60827.7	227.63	5236.52	275.6	403.86	4055.56	7193.16	2776.14	3669.3	547.56	4827.6	4784.7	21425	11867.9	6618.22
130212	109226	277.07	1178.32	690.06	725.04	748.36	295.74	3195.9	310.23	477.09	1174.5	6140.16	2576.44	1125.04	2168.9
41960.5	76198.4	241.02	1640.79	3389.88	15998.6	7492.08	1945.1	969.9	1129.14	812.43	510.3	2296.82	987.28	2360.78	2463.28
100501	58014.8	172.01	4582.47	225.78	242.74	997.46	469.58	1913.3	211.41	1112.94	956.61	3328.38	9757.18	4195.94	4384.54
59473.7	61966.9	114.33	824	3335.82	605.26	733.52	8590.24	3936.84	3497.58	1144.53	7080.21	3199.64	2021.3	4090.98	1685.92
93847.3	124314	297.67	1027.94	1164.94	1410.86	1030.32	563.92	3573.26	176.58	631.8	1579.5	5259.48	2788.82	984	1770.38
7405.44	3196.09	55.62	3.09	30.74	32.86	-127.74	-57.7	61.48	-84.95	76.14	122.31	18.86	-62.04	45.92	22.14
126808	134989	252.35	1162.87	769.56	689	649.78	440.96	2704.06	333.72	448.74	1543.05	7229.12	2889.68	1188.18	2080.34
60182.6	54853.7	81.37	2417.41	2977.54	644.48	1240.2	11463.9	2846.1	4152.06	685.26	7687.71	3252.94	7986.8	7931.04	2880.66
71657	99214.8	253.38	2747.01	5695.38	1383.3	1553.96	23900.9	5654.04	9837.45	1172.07	7952.58	4792.9	3047.94	11036.4	2864.26
76247.6	146255	448.05	3618.39	431.42	1009.12	1158.58	4193.36	5275.62	1665.36	1104.03	2130.3	3844.16	3155.36	3286.56	3816.28
81423.7	56760.2	149.35	4017	429.3	400.68	7638.36	14616.3	3781.02	9089.01	2111.67	8042.49	2751.1	4113.12	13523.4	6808.46
81601	133615	371.83	1276.17	1341.96	1323.94	1131.02	361.46	5159.02	212.22	484.38	2363.58	5535	2957.74	1039.76	2274.68
87734.6	51152.9	87.55	3734.78	212	255.46	5439.92	9646	1794.58	3369.6	1253.07	3338.82	4054.08	14365.6	9370.14	4440.3
69696.5	43858.4	168.92	496.46	2987.08	758.96	666.74	9761.54	2431.64	4015.17	1055.43	7877.25	1472.72	880.68	4214.8	1020.08
11041	5250.94	3.09	111.24	19.08	196.1	43.46	4.24	32.86	77.76	89.1	54.27	289.46	83.64	151.7	37.72
118003	57055.8	259.56	1805.59	5924.34	1359.98	1378	12485.7	2984.96	5069.79	805.14	3920.4	1938.48	3758.88	7510.38	2118.88
42793.8	148689	436.72	1359.6	1571.98	925.38	909.48	539.54	4406.42	253.53	611.55	1577.88	6363.2	3055.32	1111.1	2400.96
87037.4	64915.8	188.49	2335.01	3036.9	752.6	3520.26	6373.78	2020.36	2276.91	333.72	2988.9	3611.28	10210.6	6242.66	3248.84
109326	143207	388.31	963.05	1389.66	1349.38	1066.36	168.54	4668.24	427.68	895.05	1969.11	4633.82	2157.42	957.76	2101.66
50558.8	64984.8	74.16	659.2	2881.08	517.28	860.72	10645.6	3821.3	4484.97	827.01	6546.42	820	538.74	4797	769.16
7739.76	27365	29.87	-9.7	13.78	127.2	87.98	18.02	50.88	-46.21	304.56	-34.36	36.08	99.22	45.1	109.06
81614.4	153955	341.96	1152.57	932.8	930.68	867.08	602.08	3284.94	346.68	626.94	1421.55	5380.02	2585.46	1083.22	1867.96
17272.1	6666.16	-26.19	-138.95	66.78	107.06	12.72	-65.22	-142.9	-21.32	29.16	-50.16	34.44	-2.72	-62.86	-76.92
78378.7	84604.2	216.3	1125.79	227.9	460.04	428.24	424	1626.04	579.15	602.64	443.88	3412.84	1428.44	1788.42	1960.62
26419.7	15694.1	-8.73	90.64	94.34	127.2	63.6	-108.82	-35.96	8.91	113.4	-37.12	157.44	52.48	10.66	75.44
17624	8251.33	41.2	22.66	148.4	107.06	-4.7	-40.66	-139.02	223.56	-73.48	20.25	177.12	82.82	-3.9	91.02
38095.7	34963.3	100.94	895.07	2325.64	854.36	509.86	6902.72	1369.52	2528.82	775.17	5303.07	1207.86	886.42	3302.96	1530.12
107056	116079	225.57	937.3	757.9	740.94	464.28	249.1	2392.42	308.61	469.8	1060.29	3130.76	1871.24	799.5	1488.3
66260	115623	214.24	1123.73	846.94	516.22	914.78	439.9	3630.5	307.8	600.21	1376.19	6249.22	2896.24	1220.98	2164.8
112248	98344.4	222.48	1013.52	908.42	740.94	887.22	405.98	2410.44	246.24	328.05	1352.7	6262.34	2702.72	1005.32	1817.94
126654	69910.2	303.85	1744.82	874.5	506.68	758.96	285.14	1892.1	190.35	289.98	357.21	3765.44	6240.2	2404.24	2292.72
139999	45429.2	172.01	3510.24	267.12	263.94	1406.62	4526.2	2447.54	2381.4	950.94	10560.8	2667.46	13001.1	8500.12	4728.94
65525.9	116058	450.11	1595.47	959.3	846.94	792.88	354.04	2717.84	213.03	478.71	973.62	7225.84	3059.42	1232.46	2553.48
70779.2	70511.7	275.01	730.27	228.96	321.18	452.62	155.82	1583.64	475.47	410.67	585.63	3706.4	1589.16	1444.84	1670.34
124090	107475	399.64	1296.77	1361.04	862.84	979.44	226.84	5218.38	268.92	707.13	1763.37	5914.66	3503.86	1198.84	2337.82
90279.8	76533.1	245.14	3168.28	174.9	297.86	4874.94	12182.6	4014.22	5614.92	554.85	6432.21	4520.66	12828.1	9670.26	4008.98
144419	106310	314.15	4031.42	751.54	864.96	1859.24	756.84	2131.66	741.15	636.66	1087.02	5065.14	13697.3	5785.1	5256.2
64510.3	44912.1	98.88	4569.08	19.08	199.28	1045.16	550.14	2176.18	291.6	877.23	970.38	3084.02	12851	5926.96	4715.82
135350	126345	460.41	2453.46	966.72	1272	1315.46	616.92	2505.84	243.81	1318.68	1990.98	4819.14	8120.46	3465.32	4067.2
79460.6	104458	108.15	1118.58	944.46	538.48	417.64	222.6	2656.36	165.24	343.44	929.07	6705.96	2776.52	1225.9	2251.72
65614.1	55357.3	299.73	1103.13	2353.2	685.82	907.36	8804.36	3135.48	3270.78	547.56	4130.19	2529.7	1307.08	4653.5	1675.26
33123.7	38466.4	145.23	717.91	4584.5	8575.4	4315.26	7018.26	1873.02	2895.75	1256.31	7181.46	1187.36	683.88	3029.9	1066.82
81552.2	106356	381.1	3640.02	1255.04	613.74	1534.88	464.28	3796.92	73.71	696.6	1185.84	6709.24	11954.8	4886.38	5067.6
8512.56	3320.72	3.09	-50.5	-4.7	100.7	-12.22	-125.86	-18.92	-122.07	14.58	-80.19	86.1	17.22	23.78	41.82
69503.3	69565.2	201.88	1586.2	4712.76	990.04	1009.12	6780.82	3503.3	2973.51	853.74	6113.88	2715.84	3152.9	4110.66	1797.44
87029.9	118082	246.17	2511.14	1262.46	704.9	1188.26	647.66	3454.54	249.48	430.92	1573.02	5744.92	6640.36	2564.96	3171.76
107144	41403.9	236.9	3083.82	3400.48	737.76	2244.02	6122.56	3371.86	2852.01	1314.63	4328.64	2941.34	12031	7794.92	3704.76
5608.68	6824.78	43.26	74.16	118.72	45.58	16.96	101.76	-64.28	114.21	20.25	-5.52	247.64	59.86	27.88	9.84
93170.3	106873	213.21	750.87	828.92	628.58	611.62	281.96	2179.36	331.29	543.51	1185.03	4401.76	2156.6	912.66	1736.76
26549	5266.39	14.42	24.72	118.72	-36.9	39.22	-146.66	-27.38	27.54	15.39	3.24	168.92	140.22	-39.82	175.48
140972	118341	266.77	2302.05	613.74	633.88	1384.36	729.28	2262.04	317.52	635.04	1073.25	5930.24	9866.24	4505.08	4179.54
84577.9	46342.8	192.61	489.25	2318.22	593.6	505.62	4480.62	3513.9	1844.37	217.08	4344.03	2510.02	1159.48	2150.04	1003.68
88500.7	50467.9	133.9	2694.48	4008.92	825.74	1702.36	8875.38	3438.64	3567.24	1163.16	8009.28	4705.98	11076.6	8100.78	3794.96
71051.4	71094.7	241.02	4402.22	5114.5	984.74	2146.5	15648.8	3572.2	6448.41	1615.95	9256.68	4699.42	15061.8	12899.4	5491.54
97323.2	61775.3	140.08	1875.63	4852.68	1110.88	1196.74	21204.2	5495.04	7604.28	1155.87	10566.5	2517.4	1266.08	8040.1	1901.58
11314	3099.27	-34.98	12.36	0	-28.32	-41.6	120.84	62.54	-79.81	-46.21	72.09	204.18	10.66	115.62	43.46
124672	46574.5	170.98	578.86	214.12	267.12	7121.08	9706.42	2285.36	3979.53	558.9	3657.15	1301.34	3402.18	4149.2	569.9
139988	114613	504.7	1402.86	2332	8843.58	4553.76	1137.38	2055.34	584.82	4194.99	2605.77	3966.34	2316.5	1121.76	2888.86
86553.6	51822.4	152.44	3727.57	2910.76	463.22	1958.88	9081.02	2467.68	3832.11	856.17	8521.2	4013.9	13934.3	9286.5	5105.32
158359	132964	405.82	1589.29	676.28	895.7	915.84	445.2	1508.38	495.72	468.18	1035.99	4303.36	4007.34	1617.04	2775.7
89733.8	40101	122.57	291.49	2179.36	484.42	456.86	8251.04	1992.8	3614.22	856.17	6753.78	1383.34	735.54	3405.46	568.26
7243.32	4851.3	58.71	96.82	92.22	112.36	128.26	5.3	7.42	-63.2	238.95	48.6	188.6	32.8	-38.64	-8.98
73483.2	119313	207.03	425.39	772.74	783.34	637.06	333.9	2694.52	145.8	266.49	1061.91	1307.08	619.1	480.52	484.62
55883.5	118986	222.48	637.57	343.44	517.28	895.7	5866.04	1759.6	2350.62	276.21	804.33	2544.46	1097.98	2728.14	922.5
Single Cells
Patient 2: Healthy
47935.4	49754.2	65.92	318.27	1991.74	574.52	456.86	4000.44	2783.56	2000.7	436.59	5226.93	985.64	517.42	1613.76	557.6
16206.1	10187.7	-11.64	61.8	192.92	126.14	126.14	46.64	296.8	84.24	4.05	138.51	370.64	331.28	21.32	255.02
24397.8	22945.3	50.47	489.25	3101.56	4792.26	2484.64	3428.04	1494.6	1632.15	835.11	3414.96	742.1	638.78	1453.86	810.98
11875.9	6026.53	14.42	46.35	-27.38	95.4	47.7	12.72	191.86	-7.9	-1.57	126.36	-2.72	-3.08	-159.28	279.62
113518	36951.2	153.47	255.44	157.94	287.26	400.68	352.98	1380.12	442.26	281.07	5168.61	646.16	711.76	327.18	480.52
74851.6	58173.4	207.03	973.35	191.86	267.12	4790.14	13542.6	2832.32	4152.06	690.93	4196.61	2511.66	3494.84	5952.38	1118.48
57892	60708.2	208.06	1634.61	150.52	274.54	4212.44	12567.4	3095.2	4152.06	729	5139.45	3078.28	7679.3	7250.44	2541.18
10636.9	2706.84	21.63	391.4	37.1	91.16	-124.92	49.82	116.6	6.48	-16.18	-2.76	135.3	-12.06	-1.54	728.98
94668.8	25946.7	49.44	1017.64	2684.98	640.24	825.74	10084.8	3167.28	4198.23	763.83	7283.52	1056.16	2297.64	4779.78	1224.26
108531	32042.3	83.43	2035.28	4779.54	881.92	1068.48	10338.2	2873.66	4666.41	847.26	5982.66	1075.02	3443.18	6945.4	2180.38
7252.56	8957.91	2.06	223.51	18.02	-14.1	-36.9	-18.92	274.54	16.2	175.77	95.58	85.28	86.1	1.64	31.16
122580	58525.6	118.45	6052.28	254.4	326.48	5926.46	9332.24	4346	8202.87	2792.07	9233.19	1655.58	3038.92	14375.4	8872.4
42853.4	80862.2	169.95	2119.74	219.42	447.32	902.06	3746.04	2092.44	1638.63	914.49	1115.37	2368.16	4586.26	3691.64	2254.18
34901.2	41631.6	128.75	592.25	185.5	363.58	122.96	150.52	1126.78	53.46	511.92	384.75	1598.18	780.64	350.14	904.46
126970	51675.1	143.17	436.72	5224.74	1282.6	435.66	82.68	2592.76	459.27	311.85	4600.8	1513.72	584.66	227.96	582.2
140478	146713	344.02	1384.32	1512.62	1215.82	1014.42	824.68	3556.3	252.72	872.37	1833.84	5014.3	2643.68	915.12	2597.76
21173.9	6739.29	23.69	98.88	8.48	165.36	57.24	-20.8	-76.62	193.59	-98.37	-124.45	363.26	182.86	-1.54	118.9
61903	49741.8	153.47	1286.47	79.5	321.18	274.54	649.78	1517.92	737.91	738.72	692.55	2519.04	1320.2	2342.74	2001.62
84465.4	136665	349.17	1137.12	1685.4	831.04	1084.38	345.56	3373.98	383.13	659.34	1820.07	6578.86	3174.22	1113.56	2279.6
13154.4	34411.3	121.54	656.11	2627.74	708.08	807.72	7750.72	2686.04	4124.52	1157.49	10448.2	1134.88	634.68	3921.24	1253.78
12899	3286.73	50.47	-36.92	84.8	99.64	-28.32	-84.14	-22.68	-86.52	-58.87	8.91	129.56	38.54	-69.48	49.2
103552	110406	290.46	1013.52	1464.92	826.8	728.22	258.64	3161.98	314.28	560.52	1319.49	5398.06	2467.38	900.36	1794.98
29468.9	33496.6	149.35	1285.44	3874.3	8852.06	4147.78	2003.4	3468.32	1762.56	1654.02	7114.23	839.68	598.6	2136.1	1928.64
156363	125593	311.06	1093.86	1367.4	842.7	1000.64	828.92	3235.12	413.1	891	1465.29	5812.16	2696.16	1284.12	2551.84
45474.2	53847.4	57.68	1693.32	3121.7	749.42	808.78	12347.9	2534.46	4677.75	949.32	3647.43	1375.96	1068.46	6570.66	2361.6
116431	38318.1	122.57	53.56	173.84	246.98	2157.1	198.22	2069.12	741.15	294.84	6794.28	565.8	1191.46	69.7	620.74
18390.1	3745.08	9.27	-70.93	6.36	74.2	54.06	91.16	466.4	96.39	20.25	42.93	89.38	127.1	60.68	14.76
110125	41526.5	92.7	506.76	182.32	299.98	5084.82	13382.5	2987.08	4613.76	186.3	4622.67	635.5	2338.64	5278.34	587.12
54264.8	64679.9	197.76	1030	208.82	365.7	498.2	187.62	1065.3	957.42	652.86	343.44	1180.8	633.04	1471.9	1640
88684.7	61431.3	127.72	2648.13	157.94	378.42	1150.1	507.74	1229.6	283.5	903.15	920.97	2285.34	8378.76	3626.04	3326.74
114704	29476.5	93.73	833.27	134.62	318	2385	638.12	1525.34	463.32	178.2	3082.86	732.26	3557.98	1046.32	1141.44
29412.6	33740.7	124.63	709.67	2410.44	552.26	558.62	9462.62	2550.36	4155.3	1496.88	10029.4	1331.68	1037.3	4410.78	1200.48
56040.6	55082.3	92.7	2790.27	205.64	180.2	393.26	268.18	1515.8	332.1	800.28	765.45	1689.2	3339.04	1866.32	2639.58
21110.9	44667	117.42	1085.62	3022.06	906.3	1054.7	15272.5	2524.92	6760.26	1021.41	9711.9	1531.76	852.8	6574.76	1316.92
23006.8	41412.2	121.54	727.18	2256.74	676.28	564.98	1275.18	1793.52	1190.7	1508.22	7245.45	808.52	584.66	856.08	1032.38
28561.7	78214.1	239.99	2936.53	173.84	425.06	650.84	785.46	1835.92	444.69	1217.43	968.76	1691.66	3203.74	1756.44	2888.04
98634.5	43841.9	104.03	197.76	87.98	190.8	266.06	13.78	1384.36	38.88	200.07	485.19	1245.58	586.3	283.72	502.66
113512	27124	80.34	496.46	3576.44	809.84	726.1	9164.76	2980.72	4042.71	779.22	7746.03	473.96	1232.46	3937.64	861.82
110806	149614	460.41	1417.28	1320.76	1358.92	1149.04	535.3	4985.18	72.9	790.56	2061.45	5217.66	2449.34	788.84	2708.46
82340.2	47303.8	109.18	1664.48	125.08	324.36	463.22	73.14	2104.1	-39.5	827.82	886.14	1637.54	2187.76	961.04	1824.5
35953.7	78368.6	78.28	1596.5	199.28	182.32	522.58	2656.36	2008.7	1510.65	792.18	839.16	1312	606.8	1791.7	1639.18
100972	60229.2	90.64	3175.49	127.2	297.86	5409.18	10453.7	3239.36	5773.68	1679.94	4287.33	2420.64	3065.98	8617.38	4052.44
21731.6	24281.2	57.68	643.75	3261.62	2076.54	1066.36	8370.82	2273.7	3382.56	1025.46	6576.39	790.48	773.26	3475.16	958.58
19129.3	16513	79.31	161.71	18.02	106	197.16	-53	200.34	-30.41	72.09	150.66	389.5	131.2	53.3	257.48
7294.56	30402.5	25.75	24.72	9.54	23.32	12.72	55.12	-1.88	-14.61	-35.55	-86.52	27.88	30.34	55.76	164
51955.7	78207.9	237.93	1149.48	266.06	355.1	453.68	4401.12	2439.06	1846.8	289.98	997.11	2103.3	1218.52	2295.18	1635.9
8637.72	8079.32	5.15	391.4	61.48	281.96	3005.1	2391.36	310.58	200.88	169.29	358.83	21.32	1362.02	912.66	733.9
65583	38118.2	99.91	650.96	2619.26	397.5	911.6	8270.12	2401.96	4167.45	631.8	6020.73	1635.08	1110.28	3901.56	781.46
6022.8	50526.7	-1.94	-36.92	39.22	59.36	42.4	16.96	29.68	146.61	37.26	-50.97	93.48	172.2	-7.8	71.34
8164.8	21415.8	32.96	333.72	-19.86	120.84	156.88	11.66	299.98	121.5	180.63	88.29	397.7	250.92	116.44	414.92
62651.4	40303.9	196.73	690.1	148.4	253.34	222.6	104.94	2017.18	181.44	675.54	824.58	1600.64	848.7	236.16	1015.98
124028	45351.9	89.61	606.67	263.94	362.52	5231.1	752.6	1742.64	675.54	457.65	3981.15	668.3	3607.18	1072.56	651.9
14215.3	5265.36	-1.94	-32.01	-68.04	32.86	74.2	56.18	-198.72	27.54	8.91	-38.31	118.9	-2.72	31.16	103.32
125162	47634.4	215.27	286.34	265	443.08	263.94	170.66	1657.84	933.12	494.1	7031.61	1070.1	468.22	291.1	487.9
12111.1	5856.58	33.99	65.92	-0.94	196.1	-84.14	-102.12	139.92	62.37	-87.71	89.91	158.26	-12.88	-12.06	31.16
101035	35866.7	61.8	3275.4	156.88	186.56	344.5	1018.66	3438.64	2616.3	1534.95	6031.26	1003.68	554.32	4833.9	4310.74
84467.9	79277	203.94	2558.52	471.7	344.5	624.34	1827.44	3072.94	649.62	879.66	1251.45	1841.72	3782.66	2897.88	3179.96
11387	9743.8	15.45	113.3	111.3	111.3	62.54	94.34	168.54	-15.8	115.83	85.05	358.34	113.16	118.08	52.48
25867.8	13157.2	64.89	105.06	172.78	180.2	191.86	178.08	-137.14	95.58	67.23	52.65	577.28	277.98	59.86	607.62
18380.9	30871.2	136.99	323.42	184.44	209.88	342.38	-55.82	178.08	243.81	278.64	298.08	765.88	364.08	94.3	513.32
21490.6	36429	48.41	827.09	3811.76	4425.5	2909.7	9666.14	2790.98	4283.28	1223.1	11505.2	1213.6	695.36	4089.34	1488.3
116260	46869.1	133.9	1114.46	4749.86	1069.54	545.9	4572.84	3270.1	2695.68	818.91	6914.97	1393.18	625.66	3156.18	1599.82
39161.6	33929.2	89.61	730.27	2465.56	665.68	551.2	7355.34	2265.22	2745.9	965.52	7066.44	866.74	508.4	3370.2	496.92
87481.8	125500	243.08	1382.26	1035.62	889.34	902.06	395.38	3499.06	325.62	837.54	1684.8	6317.28	2632.2	1091.42	2434.58
28115.6	29484.8	85.49	3461.83	780.16	3668.66	1946.16	1388.6	2711.48	3361.5	2252.61	4744.98	1061.08	554.32	8305.78	5854.8
14041.4	7388.19	-70.93	-18.43	69.96	37.1	80.56	120.84	28.62	-2.76	51.03	-92.85	113.98	160.72	36.08	13.94
31982.2	34035.3	103	880.65	310.58	327.54	1612.26	2746.46	1071.66	1300.86	882.9	2834.19	1747.42	1310.36	1398.92	1412.04
6240.36	6657.92	20.6	58.71	98.58	-11.28	83.74	7.42	82.68	-81.38	-50.97	52.65	238.62	385.4	157.44	454.28
46532.6	229384	-8.73	-35.95	-43.48	20.14	63.6	-41.6	-86.02	246.24	21.06	119.88	-2.72	-39.82	115.62	-110.48
21336	76300.3	712.76	2327.8	2802.64	11048.4	4592.98	1244.44	2428.46	678.78	6786.99	3394.71	9470.18	4178.72	1703.14	4851.12
103002	43041.6	117.42	1931.25	3259.5	715.5	1214.76	6530.66	4053.44	3375.27	498.96	6805.62	2724.86	6964.26	5607.98	2459.18
69923.3	79871.4	166.86	262.65	405.98	371	306.34	336.02	995.34	324.81	236.52	297.27	1869.6	735.54	123	715.04
4175.64	6697.06	43.26	410.97	-89.9	31.8	24.38	51.94	21.2	277.83	158.76	132.84	170.56	127.1	-39.82	834.76
29788.1	15135.9	-35.95	287.37	124.02	218.36	320.12	189.74	251.22	81	19.44	54.27	722.42	333.74	77.9	692.9
30781.8	30034.8	60.77	334.75	888.28	3663.36	2592.76	1087.56	1000.64	639.09	655.29	4532.76	933.16	644.52	440.34	836.4
77097.7	114908	250.29	932.15	999.58	903.12	771.68	466.4	2663.78	190.35	559.71	1682.37	5191.42	2245.16	1027.46	2039.34
8749.44	2457.58	23.69	167.89	103.88	-15.04	71.02	220.48	96.46	-47.4	-22.51	-111.41	218.94	101.68	9.02	232.88
40974.4	94379.9	236.9	1683.02	246.98	284.08	588.3	262.88	1128.9	696.6	471.42	459.27	3953.22	4387.82	2563.32	2921.66
46458.7	66668.8	248.23	1511.01	187.62	313.76	427.18	442.02	1193.56	233.28	609.93	605.88	1530.94	2943.8	1474.36	1889.28
108693	43001.5	92.7	2972.58	3764.06	827.86	1460.68	12670.2	3395.18	5597.91	768.69	6404.67	2649.42	8250.02	9448.86	3532.56
136707	57860.2	144.2	1762.33	2332	657.2	3152.44	1116.18	1258.22	839.97	296.46	4755.51	1645.74	7840.84	3469.42	2287.8
31700.8	60224.1	157.59	1642.85	258.64	360.4	665.68	6352.58	3414.26	3933.36	923.4	7985.79	3375.12	1607.2	4953.62	2834.74
9592.8	4032.45	-11.64	-140.89	246.98	481.24	210.94	100.7	115.54	48.6	38.88	-2.76	-8.16	-30.02	-89.8	-68.3
109686	51373.3	191.58	2001.29	275.6	374.18	4146.72	2442.24	2094.56	1355.94	522.45	5749.38	2346.02	10436.1	4669.9	2846.22
10124.5	3895.46	11.33	25.75	-80.38	38.16	125.08	43.46	145.22	29.16	-54.11	-37.12	276.34	141.86	52.48	74.62
3823.68	4804.95	33.99	43.26	84.8	75.26	64.66	25.44	-99.3	23.49	-32.79	-19.75	174.66	-18.32	81.18	227.14
69343.7	194209	561.35	1869.45	1174.48	1033.5	1009.12	628.58	3004.04	527.31	903.96	1155.06	5206.18	2432.12	1105.36	3184.06
53006.5	40078.3	67.98	684.95	189.74	198.22	341.32	112.36	1566.68	153.09	575.91	671.49	1556.36	659.28	487.9	937.26
11103.1	42535.9	101.97	808.55	3661.24	2146.5	1425.7	9998.98	2864.12	4126.14	1464.48	9096.3	1258.7	933.16	4542.8	1216.88
95715.5	53895.8	173.04	8752.94	31.8	254.4	3320.98	5731.42	612.68	1679.13	363.69	265.68	7016.74	37237	17953.9	11153.6
65259.6	73480.2	188.49	956.87	259.7	280.9	2756	13022.1	2112.58	4883.49	2481.03	5284.44	1458.78	1902.4	5693.26	1239.02
98865.5	42142.4	122.57	1040.3	67.84	281.96	147.34	162.18	1594.24	248.67	419.58	563.76	1699.86	1009.42	551.86	960.22
116707	39437.7	175.1	1082.53	225.78	325.42	3977.12	13199.1	3836.14	4897.26	926.64	8618.4	1709.7	3803.16	5834.3	1147.18
72937.2	59327	258.53	838.42	136.74	291.5	541.66	3441.82	3068.7	1894.59	644.76	10135.5	2263.2	1897.48	2214.82	1462.06
15008.3	8319.31	15.45	253.38	203.52	107.06	21.2	44.52	244.86	137.7	42.12	195.21	251.74	112.34	120.54	239.44
32921.3	90576.1	226.6	1194.8	268.18	334.96	2083.96	892.52	1903.76	274.59	322.38	3133.08	3623.58	4715.82	2021.3	1868.78
87647.3	46310.9	123.6	996.01	185.5	202.46	278.78	100.7	1470.22	-25.27	353.16	1014.93	1060.26	1653.12	867.56	1161.94
91901	42561.7	122.57	247.2	274.54	314.82	4001.5	136.74	2103.04	516.78	508.68	5046.3	816.72	1947.5	451	491.18
24428	29103.7	86.52	421.27	2642.58	1138.44	655.08	5363.6	1922.84	2630.07	409.86	4147.2	826.56	586.3	2738.8	720.78
8342.88	3852.2	18.54	147.29	-9.4	68.9	104.94	-26.44	28.62	56.7	8.1	8.1	42.64	13.94	-52.7	351.78
Single Cells
Patient 3: Healthy
131392	63067.9	120.51	731.3	2197.38	400.68	914.78	9193.38	2221.76	4603.23	996.3	6994.35	1171.78	1081.58	4164.78	760.96
4987.92	14947.4	69.01	257.5	935.98	535.3	217.3	1862.42	871.32	435.78	135.27	821.34	216.48	170.56	797.04	-1.54
73670.5	62145.1	125.66	2293.81	244.86	297.86	662.5	227.9	2495.24	169.29	1148.58	1140.48	2997.1	6610.84	3235.72	3137.32
20260	10338.1	-18.43	164.8	184.44	80.56	-83.2	-89.9	-8.46	-67.15	35.64	-68.34	201.72	-74.56	-115.56	141.86
54877.2	55945.5	155.53	967.17	4118.1	966.72	960.36	11899.6	2856.7	5560.65	1662.93	12548.5	1695.76	2379.64	5800.68	1456.32
116869	49584.2	100.94	733.36	149.46	251.22	218.36	171.72	1628.16	172.53	862.65	701.46	971.7	554.32	377.2	937.26
107204	50206.3	129.78	1789.11	209.88	148.4	395.38	223.66	2148.62	157.14	416.34	1144.53	1415.32	3074.18	1464.52	2428.02
167415	151994	416.12	6063.61	2558.84	3605.06	2222.82	678.4	2608.66	1274.94	4793.58	6343.11	4602.66	2404.24	1248.04	12720.7
28366.8	7430.42	58.71	89.61	144.16	215.18	-72.86	-10.34	243.8	-33.98	104.49	144.18	-18.32	76.26	-43.72	-1.54
114400	65337	145.23	1431.7	138.86	292.56	425.06	292.56	1979.02	246.24	801.09	861.03	1564.56	2942.16	1303.8	1676.08
88867	61554.9	182.31	429.51	129.32	259.7	3522.38	244.86	3129.12	926.64	281.07	7051.86	1582.6	2051.64	460.84	952.02
73320.2	33709.8	133.9	413.03	1737.34	551.2	749.42	5399.64	1752.18	2404.89	544.32	3348.54	285.36	460.02	2027.04	291.92
86125.2	75595.8	172.01	439.81	215.18	355.1	2911.82	2324.58	2776.14	1108.08	288.36	5314.41	2163.16	1765.46	1280.84	915.94
42741.7	83242.5	117.42	869.32	598.9	456.86	426.12	337.08	1120.42	258.39	648	586.44	1996.7	856.08	494.46	1312.82
51207.2	45978.2	144.2	479.98	173.84	226.84	267.12	144.16	1246.56	106.92	49.41	758.16	2019.66	837.22	359.16	905.28
53509.7	71442.9	103	614.91	212	189.74	157.94	877.68	2962.7	230.04	744.39	1287.09	1527.66	897.9	646.98	991.38
75821.8	79998	159.65	1823.1	278.78	291.5	614.8	452.62	2693.46	66.42	1070.82	1085.4	1744.14	4401.76	2059.84	2506.74
107269	65155.7	224.54	786.92	324.36	436.72	3117.46	196.1	2633.04	1369.71	636.66	7910.46	2517.4	2150.04	961.86	1373.5
26301.2	59961.4	245.14	968.2	137.8	170.66	1785.04	7820.68	1185.08	2702.16	937.98	3366.36	1306.26	2400.96	3724.44	1409.58
89593.6	51367.1	169.95	503.67	256.52	251.22	1646.18	8150.34	2548.24	3623.13	429.3	2752.38	1559.64	1372.68	3762.98	940.54
128948	47935.2	162.74	1823.1	191.86	299.98	3826.6	578.76	2354.26	2135.16	969.57	5418.09	1343.98	1992.6	3524.36	3023.34
47015.6	5962.67	45.32	-82.57	54.06	78.44	-29.26	23.32	9.54	117.45	-1.57	-115.36	318.16	27.06	-21.86	110.7
12645.4	10965.4	12.36	-29.1	103.88	59.36	172.78	-47.24	36.04	86.67	152.28	-55.3	367.36	70.52	33.62	177.12
64326.4	57376.2	138.02	733.36	348.74	453.68	332.84	172.78	1300.62	-33.17	491.67	756.54	2631.38	1171.78	578.92	1338.24
10248	39279.1	-14.55	-23.28	130.38	-37.84	146.28	63.6	-135.26	-77.43	15.39	24.3	32.8	113.16	82.82	-60.5
55545.8	55109.1	104.03	2089.87	95.4	167.48	713.38	391.14	1396.02	89.1	384.75	454.41	1617.86	6077.02	2548.56	2339.46
60509.4	87128.7	208.06	1451.27	4298.3	914.78	791.82	3006.16	1495.66	1776.33	411.48	1768.23	2519.04	1322.66	3598.16	2166.44
116693	34036.3	88.58	922.88	2202.68	583	792.88	12187.9	2170.88	4314.06	579.15	3521.07	1681	1507.16	5085.64	766.7
104257	123560	515	1979.66	611.62	542.72	792.88	318	1895.28	485.19	4026.51	2148.12	7099.56	3444.82	1617.04	3694.92
23310	5743.28	-27.16	5.15	-89.9	90.1	-9.4	77.38	84.8	-92.85	-114.98	21.87	124.64	-35.1	-158.1	-18.32
138318	34199.1	122.57	927	2843.98	667.8	827.86	14522	1793.52	5354.1	711.18	2697.3	1485.84	1041.4	7072.5	1092.24
14980.6	9290.6	-19.4	21.63	68.9	68.9	-112.58	-3.76	-77.56	-190.84	68.04	27.54	232.06	29.52	-3.08	163.18
15641.6	16136	18.54	1769.54	297.86	1133.14	789.7	-41.6	-11.28	-13.42	1280.61	828.63	652.72	296.02	318.16	3436.62
74414.8	102476	207.03	803.4	4211.38	985.8	762.14	1544.42	3264.8	948.51	462.51	3802.95	3755.6	2748.64	1454.68	1567.84
18936.1	4572.17	20.6	31.93	184.44	125.08	59.36	-152.3	37.1	16.2	21.06	129.6	180.4	-8.16	134.48	22.96
112290	77525	181.28	2661.52	81.62	236.38	417.64	493.96	3231.94	1985.31	1380.24	3132.27	2343.56	1061.9	4761.74	3840.88
79954.6	86457.2	169.95	3735.81	3871.12	929.62	1811.54	3937.9	2191.02	1769.85	700.65	5022	4642.02	16066.3	8228.7	4727.3
116412	73724.3	142.14	1332.82	111.3	228.96	522.58	3258.44	1714.02	1058.67	554.85	622.89	1353	1456.32	1675.26	1114.38
66935.4	34431.9	98.88	284.28	2213.28	1127.84	735.64	7415.76	2709.36	2800.98	400.95	5260.95	559.24	323.9	2960.2	265.68
58938.6	80454.3	237.93	1096.95	394.32	232.14	449.44	210.94	1545.48	51.03	398.52	648	3081.56	3826.12	1476.82	1776.12
41073.5	40776.7	63.86	1910.65	3125.94	808.78	619.04	9431.88	2788.86	4612.14	1010.07	6352.02	2380.46	2421.46	6284.48	2496.08
46499.9	12246.7	-25.22	-44.68	71.02	115.54	-4.7	-56.76	56.18	-11.04	123.12	106.11	441.98	142.68	177.12	54.94
12427	4099.4	-5.82	-30.07	24.38	-90.84	45.58	92.22	171.72	-8.28	-60.44	-22.51	64.78	3.28	28.7	-21.86
58060	142116	310.03	897.13	1056.82	784.4	426.12	163.24	2955.28	231.66	541.89	1232.82	3256.22	1573.58	740.46	1535.86
127853	72787	182.31	1153.6	59.36	332.84	170.66	31.8	1352.56	1342.98	626.94	575.1	1678.54	737.18	2749.46	2420.64
64192.8	192158	275.01	1799.41	922.2	929.62	1026.08	465.34	3214.98	1007.64	16186.2	10835.4	2145.12	1116.84	739.64	4392.74
51423.1	56456.4	141.11	1661.39	154.76	239.56	481.24	596.78	1535.94	441.45	608.31	1010.07	2012.28	4938.86	1986.86	2042.62
5683.44	11397	-0.97	56.65	128.26	196.1	41.34	-4.7	36.04	-53.73	-85.33	-66.77	25.42	-195.2	32.8	136.12
85566.6	60709.2	185.4	683.92	214.12	253.34	1230.66	1788.22	2618.2	1341.36	547.56	4536	2745.36	1279.2	1287.4	1319.38
152384	53016.2	160.68	685.98	389.02	387.96	4032.24	395.38	2741.16	1202.04	648	7595.37	803.6	1662.96	1102.9	899.54
68093.8	175287	294.58	725.12	1284.72	788.64	842.7	-1.88	3335.82	224.37	392.85	1264.41	3106.16	1188.18	677.32	1281.66
112488	207540	461.44	1477.02	2528.1	1423.58	1234.9	396.44	3773.6	306.18	1362.42	2615.49	6133.6	2953.64	1173.42	2667.46
157106	53849.4	130.81	388.31	181.26	244.86	3721.66	250.16	2510.08	741.15	317.52	4541.67	1325.12	1932.74	373.92	584.66
125394	73504.9	184.37	2101.2	3768.3	654.02	872.38	6249.76	3050.68	3500.01	958.23	8455.59	2752.74	5126.64	5959.76	3398.08
145328	53390.1	166.86	341.96	5166.44	1210.52	220.48	144.16	2036.26	185.49	336.96	4010.31	1187.36	560.06	354.24	462.48
7793.52	4036.57	23.69	47.38	45.58	80.56	-57.7	86.92	-99.3	-53.73	-27.65	-45.83	-56.6	-112.84	27.06	52.48
18527	13409.6	49.44	109.18	-1.88	20.14	107.06	188.68	119.78	128.79	42.93	168.48	447.72	225.5	-9.34	85.28
65710.7	126768	278.1	787.95	1053.64	723.98	675.22	557.56	2070.18	304.56	490.05	997.92	3041.38	1405.48	392.78	1353.82
77189.3	61593	145.23	1882.84	60.42	157.94	684.76	463.22	1274.12	153.09	519.21	768.69	1860.58	6485.38	3061.88	2529.7
93770.9	56731.4	180.25	560.32	139.92	345.56	520.46	3750.28	1983.26	1234.44	729.81	954.99	1220.16	1034.02	2022.12	1111.92
25122.7	13004.8	18.54	269.86	83.74	387.96	118.72	135.68	-94.6	-58.87	599.4	494.1	376.38	172.2	246.82	390.32
49119.8	105102	263.68	9287.51	2339.42	3218.16	2910.76	1172.36	7727.4	3402	71507.6	31702.6	3589.96	3255.4	5510.4	19556.2
132392	53834	71.07	1727.31	230.02	284.08	744.12	280.9	1418.28	56.7	296.46	1065.15	1678.54	6809.28	2903.62	2416.54
91562.5	43849.2	8.24	527.36	2142.26	633.88	250.16	5263.96	2701.94	2178.9	319.14	6106.59	460.02	369	2074.6	461.66
38359.4	9464.67	40.17	123.6	42.4	-86.02	85.86	-98.36	9.54	16.2	-14.61	117.45	423.94	122.18	78.72	350.14
37611.8	65766.5	143.17	444.96	3120.64	809.84	606.32	6510.52	1352.56	2650.32	600.21	2496.42	864.28	682.24	2656.8	743.74
19745	114826	173.04	970.26	793.94	852.24	641.3	732.46	2055.34	417.96	2327.13	2373.3	1960.62	1104.54	886.42	1756.44
11384.5	7433.51	-24.25	47.38	21.2	269.24	222.6	63.6	-32.08	-17.37	23.49	59.13	231.24	54.94	29.52	-12.88
133622	104881	447.02	1649.03	3013.58	6332.44	3354.9	1336.66	1256.1	416.34	7937.19	3114.45	1556.36	901.18	1093.06	2865.9
9334.08	143032	402.73	13049.1	10195.1	16236	7226.02	2949.98	4524.08	8310.6	27347.2	12457.8	5454.64	4078.68	18262.2	21371.7
57818	165966	547.96	5847.31	3124.88	1012.3	1098.16	827.86	2930.9	3104.73	14107.8	6325.29	6982.3	3750.68	8030.26	11257
166209	53795.9	151.41	1055.75	231.08	392.2	2154.98	508.8	1739.46	835.11	520.02	7594.56	1666.24	4696.96	2024.58	1357.1
124344	30398.4	69.01	646.84	221.54	201.4	148.4	106	1388.6	63.18	639.9	1010.88	848.7	563.34	228.78	604.34
48291.6	88735.5	231.75	1166.99	204.58	426.12	396.44	395.38	1127.84	570.24	415.53	614.79	2242.7	997.94	2063.94	2459.18
67795.6	58097.2	153.47	2364.88	180.2	272.42	682.64	424	1728.86	97.2	1082.16	881.28	1786.78	5653.08	2647.78	3209.48
65616.6	53653.7	94.76	1252.48	3725.9	873.44	799.24	10770.7	2468.74	4555.44	852.12	7801.92	1562.1	2628.1	5083.18	1266.08
40668.6	58100.2	130.81	955.84	3242.54	692.18	752.6	9349.2	3058.1	3941.46	1141.29	8291.16	2164.8	1935.2	4625.62	1307.9
122557	67760.6	132.87	496.46	106	198.22	237.44	198.22	1882.56	133.65	733.86	758.16	1703.14	635.5	197.62	902.82
67893	89274.2	249.26	2851.04	2910.76	8427	3746.04	1273.06	2793.1	1006.02	29747.2	11470.4	2541.18	1576.86	1538.32	7621.9
52164.8	57077.4	129.78	1330.76	3736.5	704.9	1376.94	16931.4	3426.98	7003.26	1121.04	9760.5	2258.28	3048.76	8095.86	1845.82
21513.2	148412	305.91	1324.58	803.48	720.8	562.86	340.26	3842.5	420.39	673.11	1289.52	4894.58	2198.42	822.46	2140.2
56395.1	33178.4	86.52	624.18	2956.34	1478.7	1025.02	8750.3	3014.64	3961.71	916.11	8549.55	1404.66	699.46	3828.58	696.18
114094	60550.6	115.36	402.73	200.34	295.74	327.54	85.86	503.5	26.73	298.08	294.84	1494.86	819.18	423.12	872.48
16495.1	2795.42	23.69	276.04	91.16	-11.28	-13.16	60.42	133.56	35.64	-95.61	-89.28	383.76	211.56	85.28	154.16
158027	111192	279.13	2071.33	1147.98	4276.04	4415.96	7050.06	3504.36	3005.91	1652.4	4322.16	2529.7	2407.52	3530.92	1973.74
183254	35203.3	131.84	187.46	4152.02	860.72	417.64	4411.72	923.26	2290.68	200.07	4364.28	280.44	182.04	1599.82	164.82
94199.3	71006.1	118.45	2222.74	187.62	199.28	594.66	409.16	2335.18	140.13	1053.81	1185.84	1571.12	5226.68	2606.78	2104.12
3925.32	8279.14	-42.74	106.09	73.14	339.2	84.8	-137.14	59.36	-82.57	22.68	55.08	308.32	121.36	125.46	165.64
113174	25005.3	132.87	638.6	267.12	276.66	1017.6	4634.32	605.26	1990.98	387.99	1635.39	1266.9	807.7	2327.98	612.54
8705.76	19412.4	-32.01	-14.55	19.08	11.66	18.02	-21.74	-94.6	38.07	1.62	-33.98	115.62	33.62	-19.5	-40.18
96007.8	22490	65.92	380.07	1956.76	4529.38	4377.8	4642.8	1153.28	1844.37	970.38	3091.77	432.14	1090.6	1977.02	546.12
23971.1	179133	443.93	1526.46	2343.66	1451.14	813.02	269.24	3411.08	366.12	741.15	1540.62	4623.16	1952.42	849.52	2451.8
13831.4	4984.17	6.18	-4.85	18.02	82.68	-0.94	102.82	87.98	17.82	-71.1	81.81	77.9	50.84	103.32	5.74
76129.2	78207.9	182.31	771.47	233.2	260.76	1858.18	144.16	2513.26	788.13	411.48	5702.4	2414.9	1945.04	501.84	1174.24
130955	54972.1	85.49	1456.42	170.66	384.78	5646.62	13970.8	2078.66	5152.41	855.36	5196.96	2169.72	6687.1	7927.76	1933.56
106866	53050.2	199.82	1017.64	162.18	250.16	309.52	195.04	1685.4	70.47	601.83	884.52	1167.68	2509.2	1105.36	1289.86
84711.5	89298.9	150.38	2096.05	3633.68	840.58	1109.82	4419.14	3666.54	2189.43	784.08	3323.43	3585.04	6894.56	4906.06	2678.12
166690	43731.7	181.28	441.87	174.9	146.28	85.86	71.02	621.16	170.91	137.7	351.54	1639.18	695.36	610.9	665.84
4273.92	10099.1	16.48	46.35	-138.08	168.54	-62.4	-285.8	97.52	-135.11	34.02	52.65	168.92	45.92	-6.62	459.2
198675	38160.5	210.12	1203.04	186.56	296.8	3985.6	359.34	3064.46	1366.47	897.48	5985.9	1640	2252.54	2514.94	2024.58
Single Cells
Patient 4: Healthy
4321.8	16310	42.23	123.6	97.52	78.44	133.56	23.32	114.48	-9.47	13.77	-39.5	250.1	233.7	118.9	85.28
125661	60147.9	266.77	984.68	273.48	126.14	330.72	296.8	1032.44	485.19	383.13	437.4	3646.54	1735.12	1210.32	1794.16
15952.4	30924.7	65.92	351.23	-7.52	29.68	-12.22	-23.62	274.54	1.62	201.69	378.27	467.4	168.92	65.6	985.64
125392	45080	184.37	1533.67	341.32	344.5	853.3	4525.14	2608.66	3282.93	1102.41	12559	760.96	1449.76	4169.7	2170.54
125653	143761	350.2	1106.22	1177.66	915.84	838.46	516.22	4795.44	174.15	544.32	1985.31	4735.5	2514.12	1061.9	1547.34
4293.24	20565	9.27	-49.53	-37.84	30.74	4.24	60.42	98.58	164.43	-28.03	55.08	9.84	130.38	-50.34	-38.64
47014.8	37233.5	99.91	419.21	156.88	291.5	1991.74	6432.08	1491.42	2398.41	382.32	3591.54	1195.56	1312.82	2836.38	734.72
53443.3	41280.3	74.16	966.14	2323.52	1122.54	913.72	10942.4	2500.54	4274.37	713.61	8142.12	1256.24	840.5	4678.1	1070.1
117722	41160.9	97.85	1223.64	3437.58	840.58	1304.86	13490.6	2534.46	5277.96	702.27	4949.91	2141.84	2867.54	6777.3	1484.2
159849	148739	225.57	1252.48	701.72	620.1	940.22	306.34	2993.44	208.17	827.82	1521.18	4928.2	2810.14	1134.88	2339.46
10379.9	2892.24	6.18	199.82	57.24	90.1	-43.48	93.28	104.94	-60.44	157.14	8.1	232.88	115.62	160.72	121.36
30741.5	27209.5	122.57	272.95	90.1	313.76	75.26	410.22	120.84	313.47	267.3	873.18	571.54	396.06	403.44	611.72
27515	14456	30.9	232.78	86.92	198.22	149.46	-171.22	11.66	98.01	20.25	255.96	710.94	327.18	136.94	218.94
221164	109455	513.97	4767.87	491.84	588.3	1420.4	17865.2	5475.96	9426.78	2158.65	9715.95	4927.38	5385.76	14586.2	6892.92
9258.48	5109.83	2.06	-58.26	13.78	-11.28	-12.22	-88.96	-42.54	-49.78	73.71	170.91	304.22	193.52	-30.84	14.76
58254.8	47911.5	132.87	791.04	2958.46	787.58	780.16	14988.4	3013.58	5941.35	1391.58	9703.8	1607.2	1025.82	6247.58	965.96
106215	107881	268.83	3588.52	1044.1	689	1567.74	682.64	2421.04	271.35	834.3	1412.64	5591.58	12033.5	5068.42	4851.12
28339.9	7558.14	-26.19	-118.52	-77.56	-24.56	6.36	31.8	12.72	3.24	-21.32	-11.04	53.3	36.9	131.2	-8.16
81713.5	128266	259.56	976.44	961.42	822.56	935.98	772.74	4197.6	554.04	268.11	2162.7	4868.34	2421.46	1003.68	1732.66
8221.92	4930.61	-9.7	-75.78	-28.32	73.14	11.66	26.5	107.06	-40.69	-100.75	-62.82	241.9	16.4	-81.18	-0.36
100876	28614.4	109.18	1537.79	2947.86	504.56	822.56	7840.82	1818.96	3087.72	633.42	5672.43	1594.08	5104.5	5209.46	1799.9
10055.6	8057.69	63.86	2443.16	89.04	32.86	-65.22	-225.16	143.1	35.64	315.9	76.95	1207.86	440.34	59.86	5175.02
128864	124917	294.58	1821.04	1113	851.18	1150.1	537.42	2484.64	473.04	587.25	1433.7	7320.14	5138.12	2370.62	3317.72
12174.1	3430.93	40.17	0	-22.68	-56.76	-86.02	-127.74	-26.44	-178.99	-56.49	14.58	158.26	48.38	-118.28	-183.5
78109.1	66366	133.9	289.43	223.66	246.98	1349.38	9.54	1974.78	537.03	483.57	4122.09	1804	1249.68	523.98	1025.82
229676	157697	542.81	2695.51	6443.74	2062.76	1873.02	6031.4	6832.76	3565.62	858.6	5589.81	6433.72	7227.48	6699.4	4940.5
148431	92434.3	277.07	4442.39	3438.64	1089.68	1411.92	11062.2	4393.7	5446.44	1881.63	7562.16	2975.78	3878.6	8052.4	4858.5
170612	114260	388.31	3594.7	1086.5	522.58	1661.02	818.32	2501.6	224.37	600.21	1053.81	6140.98	12996.2	5415.28	5097.12
10792.3	11537	37.08	197.76	20.14	329.66	589.36	311.64	148.4	23.49	143.37	143.37	453.46	371.46	41	227.14
245064	180092	389.34	3022.02	6627.12	1875.14	2322.46	18163.1	7420	7712.01	1300.05	6303.42	8172.94	5931.06	9795.72	3963.06
9937.2	3609.12	11.33	-106.88	-46.3	66.78	-8.46	-35.96	51.94	-37.93	-9.47	150.66	128.74	-26.94	46.74	95.12
130016	150967	426.42	1842.67	1723.56	1275.18	1290.02	638.12	2983.9	583.2	581.58	1581.12	4423.08	4102.46	1791.7	2955.28
102954	58121.9	176.13	863.14	213.06	270.3	357.22	-19.86	1041.98	474.66	425.25	337.77	2937.24	1305.44	1039.76	1403.84
91113.1	39452.1	98.88	1882.84	3680.32	793.94	1169.18	10389.1	2527.04	4182.84	566.19	5103	2232.86	6610.84	6795.34	2289.44
60242.3	76770	254.41	3317.63	232.14	419.76	959.3	641.3	5084.82	572.67	885.33	1557.63	3438.26	6737.12	3298.86	4086.06
148800	136279	276.04	1179.35	746.24	817.26	1081.2	216.24	2457.08	335.34	771.93	1030.32	3420.22	3080.74	1065.18	2103.3
17924.8	32853.9	100.94	878.59	2385	5852.26	2841.86	2072.3	1196.74	787.32	1057.05	3538.08	1490.76	789.66	842.14	2267.3
5120.64	6128.5	38.11	220.42	-71.92	147.34	43.46	114.48	56.18	-83.76	-66.77	2.43	136.12	-6.62	64.78	123
143828	118411	335.78	3532.9	575.58	656.14	1666.32	649.78	2395.6	296.46	513.54	1056.24	6259.88	13774.4	5819.54	5150.42
148466	41326.7	100.94	1341.06	74.2	227.9	6912.26	9598.3	2867.3	4376.43	591.3	5439.96	719.14	3888.44	5646.52	1417.78
118391	55650.9	184.37	1245.27	254.4	291.5	4550.58	1009.12	2413.62	939.6	486	5485.32	2113.14	6253.32	2145.94	1749.88
117302	37844.3	122.57	2623.41	2422.1	613.74	767.44	8129.14	2329.88	3083.67	1066.77	3675.78	947.92	1691.66	3679.34	2144.3
85123.9	60160.2	241.02	2314.41	192.92	405.98	749.42	3343.24	2310.8	1624.86	865.89	1165.59	1910.6	3990.12	2913.46	2557.58
20479.2	12074.7	36.05	141.11	208.82	192.92	188.68	9.54	-40.66	-88.9	60.75	319.14	209.92	239.44	-46.44	201.72
180703	193398	710.7	2209.35	2316.1	4226.22	2766.6	1016.54	4242.12	895.05	6962.76	4507.65	5949.1	4276.3	2062.3	4159.86
11622.2	44974.9	154.5	280.16	146.28	440.96	256.52	31.8	343.44	-31.6	265.68	266.49	1087.32	585.48	117.26	438.7
83398.6	31842.5	115.36	701.43	144.16	210.94	513.04	8660.2	1158.58	3437.64	435.78	3332.34	2276.32	1069.28	3790.86	735.54
63108.4	198246	298.7	1344.15	1387.54	926.44	1022.9	511.98	5289.4	531.36	546.75	2511	4342.72	2524.78	1071.74	2298.46
98476.6	133172	273.98	974.38	944.46	546.96	683.7	444.14	3660.18	306.99	485.19	1313.82	4633.82	2596.94	879.04	1751.52
171376	42269.1	175.1	623.15	4882.36	1137.38	507.74	294.68	3450.3	805.95	675.54	6740.82	413.28	1171.78	889.7	920.86
109843	47833.2	221.45	928.03	2969.06	622.22	1022.9	15296.9	3510.72	6063.66	824.58	7692.57	2107.4	1371.04	7014.28	1293.96
49048.4	142097	330.63	1229.82	1052.58	726.1	648.72	392.2	3152.44	415.53	775.17	1494.45	4523.12	2077.06	839.68	1972.92
127923	40074.2	200.85	3327.93	275.6	385.84	1105.58	786.52	2562.02	2305.26	1555.2	5535.54	941.36	821.64	5231.6	4068.02
129930	35513.4	56.65	426.42	4554.82	1084.38	522.58	1691.76	2428.46	1037.61	214.65	4288.95	853.62	448.54	694.54	633.04
155573	39984.6	176.13	2339.13	3882.78	840.58	1454.32	8237.26	2664.84	3069.9	426.87	4305.96	1594.9	8341.04	6819.12	2532.98
117828	48952.8	198.79	2111.5	301.04	187.62	1119.36	14401.2	2707.24	6650.91	1030.32	12883.9	2519.86	6856.84	9208.6	2857.7
72719.6	98867.6	288.4	1656.24	1258.22	795	807.72	449.44	2270.52	343.44	424.44	1176.12	4108.2	4827.34	2178.74	2447.7
12956.2	85408.6	1.03	97.85	-37.84	-4.7	15.9	96.46	-99.3	103.68	-86.52	-43.45	104.96	64.78	48.38	21.32
133669	66933.5	170.98	1755.12	240.62	427.18	821.5	460.04	785.46	107.73	150.66	544.32	2351.76	6834.7	2657.62	2026.22
129621	38253.2	243.08	2741.86	3777.84	907.36	1644.06	11961	2936.2	4842.18	1239.3	5781.78	3120.92	9599.74	8716.6	3420.22
101053	45445.7	138.02	3340.29	4711.7	942.34	453.68	4976.7	3229.82	3760.83	1168.02	3743.82	1600.64	728.98	4796.18	3555.52
19545.1	32287.4	26.78	477.92	110.24	341.32	163.24	30.74	157.94	177.39	174.15	338.58	147.6	154.98	25.42	754.4
119080	142219	427.45	4041.72	1901.64	969.9	1684.34	749.42	2934.08	440.64	758.97	1531.71	7110.22	13603.8	5840.04	5653.08
153051	49225.8	136.99	1524.4	236.38	379.48	3705.76	372.06	2361.68	645.57	290.79	5394.6	1445.66	5830.2	2163.16	1600.64
5866.56	11408.3	-7.76	192.61	22.26	73.14	66.78	-76.62	110.24	-85.33	-13.42	-25.27	334.56	139.4	-1.54	1102.9
119112	67189	284.28	1277.2	265	444.14	482.3	520.46	1559.26	1031.94	561.33	895.86	3439.9	1361.2	2012.28	2242.7
17411.5	48904.4	97.85	1101.07	144.16	246.98	2002.34	7056.42	2944.68	3284.55	1347.03	4851.09	2979.88	1932.74	4118.04	1803.18
142073	71354.3	156.56	920.82	424	464.28	544.84	164.3	894.64	509.49	402.57	483.57	1078.3	985.64	1664.6	1383.34
16295.2	22881.5	88.58	390.37	97.52	97.52	128.26	14.84	345.56	26.73	-62.82	54.27	1047.96	567.44	56.58	655.18
8453.76	6321.11	27.81	140.08	-3.76	49.82	-6.58	-62.4	-138.08	77.76	63.99	89.1	74.62	104.14	68.06	-2.72
9904.44	5370.42	-22.31	77.25	64.66	23.32	10.6	-36.9	33.92	73.71	18.63	-155.67	132.84	18.04	96.76	165.64
5538.12	4677.23	40.17	20.6	39.22	106	-65.22	91.16	-130.56	-1.57	-20.94	-45.02	148.42	19.68	16.4	209.92
121792	68772.1	166.86	7743.54	265	186.56	7346.86	5255.48	2834.44	1689.66	733.05	1027.89	5781.82	34571.2	15470.9	9990.06
62186.9	71894	208.06	2363.85	271.36	285.14	922.2	514.1	758.96	-95.61	95.58	219.51	3257.86	9720.28	4373.06	3256.22
109100	36789.5	96.82	607.7	208.82	113.42	619.04	2138.02	-80.38	765.45	125.55	431.73	1233.28	2325.52	1822.04	806.06
114773	137568	344.02	3663.71	795	666.74	1879.38	820.44	2756	335.34	513.54	1439.37	6118.84	13926.1	6004.86	4864.24
79816	193869	387.28	1780.87	1518.98	845.88	1105.58	615.86	4690.5	623.7	1016.55	2051.73	5978.62	3594.88	1527.66	2943.8
191532	53033.7	173.04	6852.59	127.2	346.62	5008.5	1463.86	2003.4	967.14	339.39	5549.31	4920	30293.3	12313.9	8413.2
18359.9	8732.34	42.23	31.93	-30.2	-21.74	139.92	-37.84	-66.16	-40.69	59.94	-25.27	292.74	47.56	-86.26	14.76
80625.7	131904	342.99	1677.87	831.04	658.26	906.3	451.56	1866.66	344.25	636.66	1053	6353.36	3645.72	1462.06	2322.24
108304	60921.4	288.4	879.62	324.36	277.72	321.18	237.44	825.74	460.08	426.06	670.68	3166.84	1251.32	1835.98	1774.48
213672	113547	257.5	812.67	2157.1	3438.64	1915.42	610.56	2651.06	481.95	2002.32	2904.66	1113.56	1313.64	555.14	1318.56
47523.8	62267.6	141.11	3147.68	3612.48	739.88	1952.52	11469.2	2145.44	4609.71	1133.19	7376.67	3184.06	12805.1	10576.4	4295.16
30113.2	10238.2	57.68	-37.89	152.64	79.5	38.16	103.88	10.6	-68.34	-43.45	48.6	139.4	176.3	18.86	89.38
145730	109959	276.04	2767.61	800.3	726.1	1277.3	764.26	2805.82	391.23	532.17	1524.42	5304.58	9622.7	3794.96	3931.08
52492.4	68513.5	290.46	1620.19	328.6	445.2	751.54	372.06	1068.48	844.83	600.21	408.24	3378.4	2960.2	2450.98	2400.96
107442	83467.1	202.91	1752.03	190.8	320.12	292.56	676.28	3936.84	309.42	673.92	1688.85	2072.14	1825.32	955.3	2109.86
90101.8	42979.8	152.44	6031.68	112.36	47.7	1975.84	1101.34	2810.06	202.5	1065.15	1402.11	4293.52	20750.9	8815.82	7484.96
138398	41068.2	122.57	757.05	135.68	320.12	5938.12	15766.4	3294.48	5913.81	625.32	7695.81	1144.72	2954.46	6838.8	629.76
150620	31298.6	77.25	2042.49	7.42	293.62	4517.72	9344.96	1812.6	4237.11	1155.06	5411.61	1691.66	7956.46	6657.58	2057.38
154980	46870.2	168.92	1842.67	296.8	296.8	675.22	2423.16	2098.8	2540.16	1128.33	5565.51	810.16	2145.12	4077.04	2692.88
131637	50503	161.71	3358.83	231.08	352.98	1181.9	554.38	606.32	279.45	272.16	500.58	2997.1	12140.9	5335.74	3920.42
170887	50354.6	196.73	1010.43	330.72	379.48	498.2	514.1	611.62	885.33	280.26	439.02	1061.9	629.76	1913.06	1708.06
181691	38095.6	77.25	3504.06	121.9	200.34	1635.58	584.06	1769.14	1318.68	343.44	5890.32	2291.9	14425.4	6792.88	4934.76
110747	142869	395.52	10422.6	927.5	1213.7	4219.86	1803.06	2970.12	618.03	915.3	1270.08	11209.4	42098	17712.8	14423.8
15208.2	65933.4	154.5	766.32	699.6	645.54	727.16	410.22	363.58	545.94	634.23	655.29	1700.68	811.8	528.08	1353
139680	144437	358.44	1676.84	1558.2	1582.58	2268.4	632.82	2723.14	458.46	1356.75	2127.06	5456.28	5495.64	1935.2	3247.2
88656.1	68972.9	254.41	3667.83	296.8	339.2	862.84	9017.42	2483.58	5615.73	1766.61	4398.3	2903.62	1357.92	8884.7	4828.16
14647.1	20294.1	41.2	69.01	154.76	-29.26	128.26	255.46	-58.64	14.58	74.52	45.36	144.32	77.9	113.16	-71.02
234850	193365	518.09	3218.75	5286.22	1673.74	1964.18	15936	7487.84	6808.86	1271.7	6487.29	7771.14	5490.72	8385.32	3945.84
Single Cells
Patient 5: Healthy
48764.5	55407.8	145.23	1206.13	67.84	426.12	238.5	73.14	696.42	523.26	666.63	424.44	1700.68	702.74	1241.48	2055.74
64400.3	44740.1	126.69	574.74	177.02	153.7	36.04	-121.04	1332.42	-50.97	200.88	589.68	1781.04	697.82	199.26	905.28
117844	72299.8	271.92	2375.18	248.04	371	881.92	622.22	1300.62	424.44	508.68	324.81	3396.44	8777.28	4304.18	3418.58
101423	69852.5	212.18	1607.83	917.96	3547.82	3754.52	2166.64	1555.02	902.34	7224.39	4134.24	2281.24	2009.82	1042.22	3310.34
28547.4	38001.8	85.49	760.14	303.16	762.14	214.12	24.38	183.38	26.73	123.93	90.72	809.34	347.68	219.76	1565.38
177936	111215	378.01	767.35	630.7	978.38	820.44	371	1380.12	291.6	528.93	756.54	3775.28	1706.42	720.78	1576.86
103888	35135.4	192.61	403.76	237.44	259.7	1848.64	1115.12	1679.04	590.49	457.65	3763.26	952.84	1183.26	695.36	710.12
99298.9	74228	306.94	691.13	258.64	312.7	399.62	99.64	906.3	325.62	449.55	375.03	3058.6	1093.06	817.54	1041.4
127790	90237.3	257.5	1720.1	1421.46	3466.2	2197.38	713.38	1489.3	321.57	4477.68	3622.32	2560.04	1489.94	861	2909.36
92278.2	35759.5	177.16	317.24	284.08	248.04	1694.94	223.66	1323.94	383.13	78.57	3908.25	832.3	726.52	203.36	373.1
29096.8	31643.7	146.26	471.74	1018.66	4172.16	2181.48	590.42	1044.1	422.82	2800.17	5913	1236.56	688.8	413.28	1043.86
9458.4	9285.45	36.05	168.92	203.52	113.42	295.74	-11.28	69.96	34.02	12.96	12.96	432.96	305.04	111.52	113.98
50127	107385	572.68	2136.22	1126.78	765.32	718.68	280.9	3448.18	250.29	912.87	1611.9	7650.6	3270.16	1103.72	2911.82
8298.36	18186.7	-11.64	-76.75	139.92	43.46	39.22	56.18	142.04	145.8	16.2	5.67	76.26	56.58	100.86	-30.84
43726.2	76631	257.5	1826.19	785.46	2132.72	1515.8	692.18	1398.14	520.83	3555.09	2816.37	2558.4	1562.92	782.28	3395.62
111875	86766.2	94.76	1370.93	179.14	280.9	2444.36	6578.36	2095.62	3773.79	652.05	2898.99	725.7	1220.98	4182	1517
18958.8	6208.84	46.35	-25.22	71.02	116.6	132.5	133.56	164.3	63.99	46.17	253.53	242.72	51.66	195.16	234.52
147381	123767	340.93	743.66	572.4	827.86	758.96	481.24	3211.8	291.6	330.48	1304.91	4475.56	1953.24	852.8	1629.34
64544.8	64544.9	107.12	424.36	115.54	362.52	4534.68	474.88	3172.58	433.35	428.49	4187.7	2640.4	2542.82	637.96	779.82
107617	58810.9	218.36	1207.16	3117.46	590.42	941.28	7736.94	1880.44	3696.03	996.3	6224.85	2055.74	3133.22	4883.1	1507.98
163162	61353	260.59	3284.67	222.6	397.5	5751.56	10278.8	3699.4	6292.08	1931.85	7611.57	2275.5	3176.68	9048.7	4737.96
92891.4	150730	339.9	1261.75	994.28	784.4	875.56	240.62	2288.54	77.76	860.22	1255.5	6245.94	3107.8	1192.28	2002.44
4208.4	12999.6	31.93	69.01	122.96	54.06	67.84	33.92	77.38	-9.47	11.34	85.86	138.58	18.86	264.86	632.22
177292	105588	203.94	419.21	1036.68	470.64	371	333.9	922.2	108.54	200.07	467.37	1234.92	567.44	259.12	674.86
138172	65116.6	339.9	777.65	365.7	451.56	2292.78	2101.98	2534.46	1701.81	491.67	6927.93	3462.04	2482.14	1466.98	1226.72
32006.5	12571.1	28.84	122.57	27.56	261.82	54.06	118.72	12.72	45.36	1133.19	369.36	286.18	118.9	63.96	376.38
59915.5	108441	251.32	910.52	3274.34	793.94	541.66	6896.36	3465.14	3077.19	1095.12	4270.32	2185.3	1086.5	3302.14	1266.08
8225.28	37200.5	105.06	947.6	200.34	210.94	298.92	460.04	1106.64	758.16	1206.9	891	1313.64	583.02	2173.82	2017.2
18152.4	22020.4	78.28	143.17	-0.94	175.96	27.56	13.78	447.32	144.18	85.86	66.42	1077.48	355.88	189.42	614.18
7742.28	4496.98	43.26	63.86	69.96	177.02	144.16	14.84	61.48	-73.48	5.67	-16.18	72.98	-76.92	118.08	-28.48
125929	61106.8	201.88	3629.72	215.18	347.68	5115.56	14438.3	2001.28	5707.26	1405.35	4722.3	4380.44	13703.8	10862.5	4847.02
3031.56	15268.7	79.31	410.97	94.34	344.5	150.52	53	64.66	10.53	223.56	337.77	602.7	443.62	285.36	416.56
181296	105080	414.06	2290.72	996.4	681.58	1223.24	506.68	1566.68	106.92	294.03	829.44	4800.28	9415.24	4088.52	3104.52
62761.4	106688	312.09	8536.64	233.2	328.6	2784.62	5350.88	2728.44	2090.61	1266.84	1238.49	6441.1	28413	14128.6	10011.4
7012.32	29676.4	27.81	-71.9	27.56	-5.64	-46.3	-78.5	135.68	-39.5	77.76	139.32	43.46	0.82	-65.58	200.9
237468	114336	390.37	1461.57	1334.54	1075.9	870.26	366.76	1645.12	222.75	720.9	1530.9	5666.2	3159.46	1168.5	2302.56
11578.6	10486.4	40.17	-54.38	33.92	620.1	230.02	-109.76	155.82	82.62	27.54	55.89	118.9	91.84	86.1	170.56
59566.9	128826	422.3	1521.31	655.08	610.56	730.34	261.82	2550.36	440.64	817.29	1551.96	8797.78	3514.52	1375.14	2892.14
118118	58183.7	119.48	1394.62	3553.12	840.58	1017.6	8019.96	2422.1	3398.76	1065.15	7218.72	3571.92	5013.48	5375.1	2186.12
108797	214347	455.26	1467.75	1897.4	1297.44	1293.2	829.98	4485.92	391.23	749.25	2014.47	7797.38	3070.9	1309.54	2615.8
72396.2	67250.8	204.97	704.52	4313.14	995.34	733.52	9733.98	2903.34	3823.2	1438.56	7412.31	2378	1105.36	4263.18	1043.04
38006.6	35646.2	135.96	794.13	373.12	1315.46	747.3	252.28	507.74	370.17	2577.42	1801.44	1021.72	611.72	426.4	1404.66
40202.4	8932.16	15.45	467.62	262.88	1016.54	573.46	146.28	270.3	-31.6	392.04	549.99	305.86	143.5	232.06	1125.86
123840	77559	262.65	1574.87	359.34	374.18	973.08	271.36	1027.14	86.67	255.96	518.4	3426.78	5111.88	2001.62	2494.44
108464	178598	421.27	1528.52	1587.88	1189.32	1197.8	592.54	4000.44	340.2	1059.48	1377	6022.08	2779.8	947.92	2562.5
38016.7	36826.6	168.92	2461.7	612.68	1359.98	1232.78	1491.42	990.04	356.4	2076.03	1731.78	1889.28	1224.26	898.72	5252.92
14056.6	5023.31	21.63	88.58	-40.66	104.94	150.52	216.24	334.96	-37.12	-108.65	13.77	356.7	167.28	204.18	186.96
9133.32	3431.96	-2.91	90.64	149.46	2.12	137.8	22.26	-66.16	174.96	-0.38	117.45	259.94	72.98	-58.14	61.5
10657.1	25209.2	20.6	-42.74	48.76	43.46	-71.92	-144.78	-56.76	-51.35	-23.7	-74.67	-79.64	-38.64	-0.36	-17.14
46063.1	39624.1	128.75	372.86	3336.88	8326.3	3750.28	1644.06	2456.02	758.16	409.86	4620.24	1148	527.26	487.9	514.96
199615	133485	390.37	1306.04	1109.82	1049.4	948.7	470.64	4341.76	360.45	730.62	1578.69	4979.86	2114.78	876.58	2125.44
50905.7	42619.3	42.23	345.05	1805.18	7321.42	3773.6	823.62	913.72	418.77	236.52	2488.32	1158.66	643.7	563.34	901.18
200565	154783	409.94	1246.3	1340.9	1329.24	1029.26	520.46	2334.12	306.99	779.22	1106.46	5572.72	2593.66	980.72	2021.3
98783.2	75183.8	253.38	3389.73	576.64	905.24	1118.3	396.44	1355.74	312.66	3894.48	3159.81	3260.32	1742.5	943	6887.18
73936	192063	490.28	1337.97	983.68	1189.32	1127.84	551.2	2674.38	486	1059.48	1310.58	7411.16	3597.34	1367.76	2777.34
33558	38146.1	121.54	922.88	2668.02	744.12	606.32	5585.14	1921.78	2408.94	1342.17	6341.49	1749.88	1105.36	2345.2	1555.54
214988	135679	602.55	1432.73	1186.14	1105.58	938.1	462.16	4260.14	364.5	2357.1	2013.66	5177.48	2344.38	777.36	2305.84
106751	78904.2	366.68	1011.46	99.64	400.68	356.16	2994.5	2256.74	2096.28	710.37	4045.95	2608.42	1694.12	2980.7	1608.02
32219	10129	50.47	158.62	93.28	41.34	54.06	-21.74	309.52	-108.65	2.43	-89.28	498.56	243.54	-20.68	310.78
11695.3	2822.2	8.24	15.45	-21.74	43.46	15.9	-50.06	-75.68	124.74	-84.14	61.56	321.44	187.78	195.98	-79.64
40482.1	35404.2	121.54	1104.16	1710.84	6844.42	3222.4	845.88	1063.18	250.29	2217.78	1387.53	1228.36	561.7	1107	1749.06
110877	34275.3	185.4	316.21	183.38	260.76	3753.46	2963.76	2339.42	1112.13	456.84	4455.81	548.58	1567.84	1361.2	682.24
6759.48	3932.54	-0.97	103	-1.88	90.1	142.04	-39.72	-94.6	111.78	-24.89	63.99	52.48	-49.98	50.84	167.28
14345.5	4971.81	64.89	-68.99	49.82	207.76	220.48	161.12	327.54	126.36	-44.64	88.29	179.58	43.46	38.54	102.5
9478.56	22096.6	52.53	238.96	398.56	1087.56	709.14	735.64	461.1	422.01	1975.59	1577.07	96.76	136.12	345.22	496.1
88949.3	139474	453.2	1264.84	1039.86	901	874.5	368.88	2618.2	292.41	439.02	831.87	4565.76	2284.52	950.38	1866.32
127328	68157.2	135.96	1226.73	3475.74	781.22	988.98	11624	1900.58	4869.72	1213.38	5603.58	3817.92	2404.24	5515.32	1589.16
87948	75975.9	212.18	3005.54	5570.3	1099.22	2345.78	25478.2	4715.94	9604.17	642.33	7942.86	4567.4	9952.34	14895.3	4191.84
6730.92	4231.24	31.93	104.03	42.4	244.86	160.06	20.14	153.7	39.69	-42.26	100.44	277.98	167.28	47.56	136.94
62314.6	54818.7	108.15	534.57	3213.92	731.4	477	9001.52	2930.9	3811.86	946.08	6501.06	1097.16	563.34	4329.6	765.06
224163	58495.8	185.4	835.33	399.62	411.28	5975.22	6212.66	2466.62	2733.75	650.43	6006.96	1460.42	2931.5	3293.94	1118.48
185038	79011.3	300.76	569.59	940.22	670.98	583	226.84	1049.4	278.64	340.2	665.01	2372.26	1658.86	656.82	626.48
4880.4	6424.11	0	185.4	190.8	344.5	86.92	-153.24	308.46	-12.23	-56.49	-27.65	329.64	47.56	66.42	323.9
39514.4	25860.2	87.55	448.05	405.98	1200.98	550.14	580.88	528.94	93.96	944.46	1060.29	741.28	353.42	234.52	1033.2
13669.3	10769.7	60.77	188.49	177.02	762.14	276.66	100.7	-60.52	116.64	-38.31	19.44	583.84	241.08	144.32	391.96
68134.9	66139.4	247.2	1015.58	237.44	354.04	120.84	2461.32	1283.66	1011.69	296.46	496.53	3307.88	1265.26	1790.88	1562.92
32823.8	151106	459.38	1131.97	793.94	908.42	755.78	413.4	1699.18	246.24	645.57	786.51	4885.56	1980.3	861	2141.84
9871.68	15206.9	54.59	117.42	28.62	21.2	46.64	72.08	188.68	-8.28	-54.92	72.09	-7.8	91.84	58.22	140.22
19739.2	5677.36	-26.19	140.08	43.46	180.2	77.38	40.28	-37.84	113.4	223.56	23.49	74.62	43.46	-53.88	-7.8
108175	60522.8	95.79	1427.58	4295.12	890.4	866.02	5332.86	2219.64	2953.26	1317.06	8938.35	996.3	4663.34	4119.68	1626.88
9654.12	7521.06	29.87	26.78	37.1	50.88	102.82	-29.26	-232.8	-86.52	80.19	46.17	188.6	136.94	19.68	345.22
138899	68361.1	222.48	1246.3	192.92	324.36	218.36	225.78	1398.14	396.09	197.64	299.7	1496.5	2144.3	1833.52	1470.26
24932	8835.34	47.38	185.4	206.7	-8.46	119.78	161.12	524.7	52.65	76.14	68.04	445.26	231.24	111.52	275.52
8940.96	9346.22	54.59	1232.91	98.58	144.16	74.2	225.78	0	-7.09	441.45	249.48	735.54	408.36	205	2651.88
40582.9	46626	124.63	873.44	175.96	364.64	336.02	2333.06	1429.94	1161.54	268.92	673.11	1245.58	710.94	1538.32	1121.76
36839.9	12026.3	-13.58	1456.42	328.6	1499.9	679.46	385.84	128.26	123.93	813.24	379.08	970.06	394.42	165.64	2889.68
11848.2	3952.11	26.78	46.35	129.32	64.66	-9.4	-59.58	230.02	-37.93	192.78	166.05	49.2	111.52	-28.48	40.18
7783.44	6306.69	58.71	174.07	-101.18	224.72	619.04	178.08	-42.54	84.24	12.15	9.72	24.6	307.5	109.06	309.96
51096.4	40641.7	129.78	2722.29	917.96	3028.42	1532.76	743.06	1010.18	427.68	4526.28	2483.46	2161.52	1106.18	453.46	6282.02
40371.2	33716	47.38	364.62	3767.24	5571.36	2941.5	6039.88	1970.54	2901.42	867.51	9748.35	1145.54	752.76	2614.98	940.54
98361.5	53814.4	177.16	1417.28	205.64	363.58	346.62	183.38	1408.74	299.7	596.16	584.01	1557.18	1239.02	478.06	1535.04
13532.4	4478.44	24.72	51.5	186.56	240.62	217.3	2.12	81.62	116.64	-57.68	47.79	351.78	71.34	71.34	77.9
114415	58177.5	258.53	661.26	163.24	293.62	452.62	24.38	1030.32	171.72	173.34	384.75	3777.74	1960.62	827.38	1415.32
194922	122439	456.29	984.68	1279.42	1281.54	942.34	299.98	3447.12	351.54	884.52	1487.97	3922.88	1959.8	942.18	1691.66
108712	44780.3	213.21	987.77	294.68	415.52	157.94	190.8	1465.98	298.89	387.18	851.31	2338.64	1018.44	504.3	1201.3
50785.6	59497.9	202.91	741.6	273.48	813.02	577.7	304.22	1653.6	391.23	471.42	605.07	2249.26	964.32	1297.24	1652.3
10958.6	3279.52	19.57	85.49	-67.1	110.24	-0.94	-147.6	-156.06	55.89	48.6	73.71	124.64	-53.88	31.16	38.54
6228.6	6415.87	29.87	195.7	-18.92	34.98	48.76	127.2	34.98	-64.39	1404.54	910.44	22.14	-42.54	-4.26	497.74
98137.2	55102.9	175.1	1345.18	116.6	291.5	800.3	301.04	1118.3	977.67	720.9	691.74	2711.74	1282.48	2843.76	2296
19818.1	9058.85	30.9	101.97	-40.66	90.1	83.74	40.28	299.98	97.2	259.2	236.52	245.18	120.54	159.08	137.76
Single Cells
Patient 6: Healthy
17278	17217.5	43.26	339.9	119.78	485.48	287.26	6.36	170.66	-135.11	515.16	456.84	547.76	289.46	268.96	697
2029.44	3474.19	27.81	146.26	100.7	146.28	85.86	14.84	60.42	-54.11	-6.71	2.43	47.56	-14.42	-42.54	121.36
5533.08	24022.7	29.87	-12.61	-47.24	57.24	79.5	116.6	-152.3	-28.03	-53.73	23.49	79.54	152.52	4.1	-18.32
59647.6	35409.3	78.28	400.67	2008.7	581.94	320.12	5344.52	2408.32	2874.69	1058.67	9833.4	1288.22	681.42	2578.9	839.68
19084.8	14642.5	-0.97	554.14	133.56	894.64	405.98	39.22	22.26	296.46	19.44	72.09	339.48	166.46	36.08	1034.02
8537.76	2412.26	16.48	109.18	63.6	129.32	83.74	155.82	186.56	-61.63	-64.39	-45.83	328	163.18	103.32	189.42
60667.3	199124	363.59	907.43	1260.34	995.34	811.96	71.02	2647.88	302.13	663.39	1128.33	3981.92	1933.56	756.04	1545.7
159243	59229.1	201.88	450.11	222.6	301.04	4148.84	1082.26	2063.82	880.47	471.42	5200.2	1582.6	2295.18	785.56	432.14
53666.8	71735.4	183.34	2672.85	3344.3	13350.7	31449.1	17638.4	3967.58	6486.48	4492.26	6097.68	2642.04	11224.2	7265.2	4652.68
18623.6	18935.5	5.15	237.93	510.92	649.78	475.94	228.96	491.84	216.27	302.94	436.59	510.04	391.14	77.9	462.48
74786.9	113502	362.56	2809.84	2104.1	7291.74	4786.96	1581.52	2100.92	1171.26	7621.29	8047.35	3776.1	2350.94	1640	4994.62
9305.52	22504.5	35.02	74.16	54.06	41.34	20.14	54.06	111.3	84.24	5.67	116.64	224.68	59.86	2.46	-12.06
149560	116577	314.15	440.84	1160.7	585.12	438.84	275.6	1729.92	341.82	322.38	983.34	2428.02	1052.88	701.1	1006.14
8779.68	6297.42	-23.28	338.87	38.16	-42.54	28.62	-47.24	221.54	117.45	43.74	-29.22	291.92	163.18	-67.94	756.04
38789.5	61598.1	170.98	971.29	669.92	2280.06	1547.6	533.18	707.02	471.42	2966.22	2597.67	1772.84	1038.12	612.54	1935.2
76760	62465.4	166.86	2884	213.06	254.4	648.72	685.82	2239.78	86.67	1236.06	841.59	2296.82	6550.98	3130.76	3494.84
7603.68	5237.55	15.45	114.33	57.24	126.14	110.24	142.04	-61.46	-75.86	218.7	411.48	-62.86	-39.82	18.04	465.76
6274.8	1710.83	62.83	4.12	-6.58	-18.92	25.44	-22.68	-7.52	-3.95	88.29	298.08	238.62	-13.24	-62.04	193.52
12788.2	4805.98	25.75	41.2	5.3	227.9	109.18	-67.1	-30.2	13.77	29.97	123.12	214.84	260.76	154.16	361.62
100031	49697.5	241.02	965.11	144.16	433.54	1326.06	3171.52	1274.12	1048.95	393.66	2932.2	3469.42	1784.32	1856.48	1407.12
23889.6	29406.5	105.06	450.11	355.1	647.66	518.34	111.3	249.1	85.86	861.84	606.69	1125.86	574.82	119.72	964.32
22380.1	22096.6	92.7	185.4	327.54	717.62	473.82	195.04	180.2	42.93	445.5	392.85	796.22	407.54	182.86	640.42
30001.4	18796.5	9.27	90.64	51.94	185.5	60.42	-132.44	93.28	-82.57	201.69	147.42	769.98	154.98	109.06	394.42
66681.7	65390.6	135.96	816.79	133.56	186.56	1370.58	7530.24	2889.56	2721.6	353.16	4982.31	1945.86	1112.74	3745.76	1148.82
34104.8	39111.2	84.46	831.21	3024.18	2135.9	1354.68	8984.56	3325.22	3895.29	677.16	9823.68	2129.54	1192.28	3819.56	968.42
100146	78795	230.72	1058.84	320.12	488.66	482.3	360.4	1346.2	349.11	427.68	835.11	3583.4	1540.78	1432.54	2025.4
11502.1	2449.34	-29.1	37.08	25.44	60.42	51.94	19.08	221.54	65.61	-47.4	90.72	61.5	22.14	168.1	14.76
8025.36	2621.35	37.08	-6.79	40.28	133.56	118.72	-9.4	-88.96	56.7	-37.12	52.65	50.84	19.68	-85.9	64.78
10599.1	13067.6	35.02	637.57	139.92	86.92	196.1	103.88	-26.44	-114.17	239.76	106.92	439.52	173.02	67.24	1097.98
27871.2	78014.3	180.25	887.86	275.6	415.52	717.62	1976.9	1633.46	1095.93	451.98	604.26	2626.46	2262.38	1963.9	1416.96
123946	142344	448.05	3505.09	2452.84	7445.44	4617.36	1666.32	3083.54	1085.4	7316.73	8246.61	4487.86	5372.64	2876.56	5066.78
7193.76	33706.8	64.89	74.16	19.08	74.2	-15.04	144.16	-10.34	-135.11	-59.25	48.6	-91.34	-42.54	88.56	187.78
8977.92	10027	58.71	1226.73	280.9	99.64	-23.62	133.56	-123.98	-79.81	283.5	55.89	976.62	359.16	118.9	2548.56
12652.9	16679.8	79.31	685.98	185.5	439.9	191.86	68.9	68.9	70.47	515.97	739.53	809.34	460.84	85.28	1207.04
40453.6	5968.85	51.5	30.9	97.52	-15.04	19.08	-57.7	-115.4	105.3	34.83	202.5	296.02	95.12	44.28	214.84
17068	6976.19	17.51	139.05	185.5	584.06	207.76	24.38	-132.44	-73.48	8.1	-52.54	319.8	106.6	132.84	332.92
15744.1	5705.17	36.05	-71.9	106	-17.98	115.54	-21.74	5.3	-225.2	-48.59	92.34	98.4	-3.08	-108.94	94.3
12219.5	3590.58	-25.22	97.85	197.16	183.38	103.88	37.1	205.64	59.94	7.29	204.12	391.14	151.7	-110.48	189.42
44914	20362.1	59.74	510.88	266.06	948.7	559.68	92.22	286.2	18.63	655.29	899.91	243.54	219.76	161.54	497.74
29987.2	7840.36	-4.85	157.59	-17.98	19.08	1.06	39.22	174.9	-84.95	80.19	98.01	374.74	195.16	92.66	172.2
12233.8	6221.2	91.67	294.58	228.96	231.08	220.48	-27.38	125.08	64.8	1936.71	733.05	427.22	200.08	232.88	728.98
108589	45741.3	181.28	1520.28	281.96	153.7	509.86	454.74	1688.58	62.37	749.25	726.57	2027.86	3593.24	1860.58	1763.82
82273.8	44043.8	183.34	570.62	2362.74	503.5	381.6	5730.36	2391.36	2468.88	677.97	7219.53	1169.32	562.52	2346.02	688.8
5040.84	6328.32	-3.88	-2.91	33.92	410.22	306.34	62.54	106	129.6	114.21	-109.84	301.76	59.04	-18.32	139.4
41404.4	55944.4	138.02	1219.52	3698.34	2245.08	1121.48	9817.72	2466.62	4458.24	1333.26	4172.31	1293.14	843.78	5621.1	1840.08
7673.4	23140	-5.82	-43.71	137.8	66.78	-128.68	31.8	69.96	119.88	-15.8	-42.26	-30.84	-75.74	5.74	-39.82
39723.6	14632.2	113.3	89.61	57.24	226.84	151.58	-181.68	403.86	-24.08	204.93	124.74	677.32	261.58	54.12	389.5
37313.6	39837.3	114.33	839.45	992.16	3678.2	1989.62	557.56	555.44	150.66	2442.15	2578.23	828.2	760.14	528.08	1371.86
9289.56	6424.11	4.12	113.3	-92.72	8.48	47.7	-55.82	19.08	-46.21	234.09	164.43	211.56	86.1	53.3	179.58
9572.64	43023.1	89.61	351.23	701.72	2197.38	885.1	411.28	235.32	140.94	1705.86	1007.64	1001.22	596.14	266.5	911.84
26691	68134.5	5.15	-11.64	179.14	201.4	67.84	44.52	55.12	0	44.55	17.82	181.22	109.06	72.16	-37.46
3029.88	5124.25	5.15	101.97	51.94	73.14	98.58	220.48	-31.14	-53.73	169.29	131.22	228.78	82.82	44.28	469.04
2777.88	8655.09	35.02	-71.9	28.62	-33.02	15.9	-31.14	-212.94	90.72	73.71	51.84	113.98	3.28	-53.88	101.68
24099.6	3563.8	-7.76	4.12	-47.24	48.76	1.06	-188.26	15.9	-2.76	-23.7	-63.2	50.84	-87.44	-23.4	43.46
26395.3	4374.41	-23.28	22.66	-64.28	153.7	1.06	-81.32	-276.28	83.43	107.73	148.23	119.72	-11.7	90.2	105.78
18685	10433.9	-3.88	87.55	79.5	108.12	-13.16	138.86	145.22	-52.54	160.38	-46.21	325.54	127.92	218.94	236.98
55132.6	30569.4	77.25	534.57	3728.02	7655.32	3822.36	5660.4	2316.1	1980.45	906.39	3427.92	1219.34	576.46	1966.36	539.56
7978.32	7931	14.42	11.33	223.66	221.54	234.26	63.6	225.78	53.46	156.33	122.31	10.66	-41.36	84.46	104.96
20384.3	24684	85.49	612.85	3385.64	4674.6	2315.04	4693.68	2855.64	2960.55	1845.99	10344.5	790.48	467.4	2325.52	791.3
11076.2	6021.38	15.45	27.81	-91.78	108.12	-0.94	40.28	-40.66	-36.74	-30.41	46.98	201.72	39.36	-93.7	102.5
99664.3	83858.5	191.58	6118.2	190.8	373.12	2387.12	1412.98	886.16	638.28	306.99	193.59	5147.96	23532.4	10035.2	7172.54
21283.9	15755.9	30.9	78.28	227.9	187.62	76.32	40.28	220.48	-62.82	-67.15	122.31	282.9	171.38	136.94	25.42
33601.7	108271	286.34	941.42	2891.68	10901	5279.86	1247.62	2673.32	463.32	2774.25	2150.55	2421.46	1131.6	610.9	1981.94
19885.3	3252.74	35.02	-59.23	48.76	55.12	73.14	140.98	-141.96	-12.23	62.37	-16.18	42.64	54.94	-6.62	-1.54
184496	157640	501.61	1233.94	1544.42	1196.74	1516.86	965.66	2564.14	305.37	886.95	1450.71	4553.46	2343.56	1007.78	2123.8
164488	61218.1	204.97	5363.21	236.38	246.98	1992.8	946.58	503.5	393.66	306.18	420.39	3936.82	20359.8	9401.3	6405.84
5975.76	10408.1	15.45	217.33	114.48	319.06	268.18	47.7	178.08	134.46	106.92	40.5	491.18	239.44	200.9	580.56
18700.9	7082.28	40.17	76.22	34.98	142.04	75.26	74.2	151.58	-5.52	141.75	281.07	476.42	181.22	86.1	282.9
206675	124519	351.23	1401.83	1460.68	1312.28	914.78	274.54	2289.6	387.18	1062.72	1208.52	4514.1	2532.98	1009.42	2154.14
17655.1	7321.24	37.08	42.23	62.54	62.54	-6.58	-177.92	54.06	205.74	-132.35	-84.95	199.26	66.42	-64.4	-117.1
29184.1	31621	45.32	663.32	2992.38	592.54	606.32	10471.7	2741.16	4517.37	1018.98	7734.69	1066.82	710.94	4371.42	1200.48
15535.8	6581.7	23.69	91.67	6.36	192.92	125.08	-20.8	279.84	93.15	81	-26.46	461.66	177.94	128.74	414.92
84706.4	68340.5	191.58	1156.69	3946.38	806.66	1656.78	23642.2	3079.3	10440.9	1339.74	8157.51	2009	1295.6	11628.4	1660.5
12158.2	410.97	16.48	87.55	-49.12	21.2	-18.92	-48.18	-59.58	121.5	36.45	0.81	15.58	-82	-13.24	123
7078.68	8150.39	63.86	174.07	33.92	78.44	-15.04	-36.9	21.2	73.71	125.55	41.31	59.04	86.92	-15.6	122.18
8880.48	3096.18	1.03	-38.86	-90.84	139.92	-18.92	189.74	172.78	-44.64	151.47	-23.7	149.24	143.5	-71.02	138.58
46951.8	45983.3	197.76	674.65	3487.4	1172.36	775.92	10620.1	3613.54	4752.27	1540.62	14670.7	2473.12	1219.34	4825.7	1366.12
27382.3	11354.7	72.1	124.63	-8.46	152.64	-32.08	-67.1	-62.4	-34.36	-53.73	55.89	493.64	227.96	72.16	221.4
7302.12	4232.27	56.65	79.31	106	107.06	102.82	41.34	95.4	129.6	43.74	156.33	105.78	71.34	-30.84	75.44
8109.36	6213.99	85.49	177.16	47.7	295.74	77.38	-57.7	95.4	36.45	58.32	63.99	437.06	250.92	54.94	262.4
9208.92	8875.51	65.92	177.16	83.74	237.44	26.5	-47.24	50.88	17.01	30.78	48.6	375.56	209.1	173.84	346.04
12376.6	2353.55	-34.98	81.37	8.48	40.28	3.18	18.02	171.72	68.04	64.8	134.46	-29.66	-62.04	6.56	82
6693.96	1763.36	20.6	110.21	57.24	299.98	181.26	93.28	11.66	-99.56	-67.15	155.52	144.32	107.42	-26.94	123.82
28126.6	8867.27	-10.67	182.31	54.06	4.24	26.5	37.1	-236.56	-152.1	102.06	-80.19	346.86	171.38	164	202.54
6720.84	4281.71	36.05	18.54	-72.86	31.8	-25.5	76.32	85.86	-48.59	-78.62	29.97	381.3	107.42	55.76	91.02
83449	196495	538.69	1543.97	1824.26	1270.94	1141.62	692.18	4898.26	335.34	627.75	2096.28	5717.86	2805.22	1433.36	3266.06
9000.6	3528.78	-62.14	36.05	40.28	94.34	-112.58	20.14	42.4	28.35	90.72	-79.81	228.78	200.08	63.96	211.56
19906.3	165806	368.74	1313.25	1303.8	754.72	730.34	148.4	2306.56	403.38	523.26	775.98	7164.34	3073.36	1015.16	2425.56
265.44	52747.3	96.82	186.43	719.74	284.08	220.48	202.46	177.02	551.61	-15.8	-11.85	755.22	649.44	570.72	609.26
6005.16	9562.52	94.76	72.1	309.52	167.48	40.28	101.76	147.34	-91.66	276.21	209.79	254.2	188.6	223.04	100.04
9365.16	2813.96	3.09	125.66	65.72	-25.5	38.16	63.6	-93.66	77.76	111.78	115.02	-12.88	170.56	89.38	131.2
51316.4	22104.8	58.71	383.16	234.26	713.38	185.5	54.06	303.16	14.58	274.59	435.78	786.38	525.62	167.28	801.14
57912.1	30613.7	79.31	804.43	3925.18	3084.6	1368.46	9145.68	2512.2	3780.27	2099.52	7240.59	1161.94	713.4	3739.2	1393.18
14929.3	32590.2	50.47	-43.71	62.54	51.94	-45.36	94.34	24.38	-77.43	-23.7	44.55	46.74	70.52	52.48	58.22
7019.88	32528.4	57.68	301.79	332.84	1550.78	781.22	269.24	241.68	19.44	84.24	39.69	760.96	355.06	187.78	848.7
39531.2	81838.6	191.58	896.1	1072.72	429.3	561.8	376.3	1860.3	510.3	319.95	3961.71	3376.76	1494.04	496.92	1205.4
15067.1	185218	26.78	201.88	92.22	8.48	228.96	-4.7	82.68	51.84	34.02	19.44	3012.68	1411.22	538.74	210.74
39700.9	11380.5	51.5	115.36	132.5	63.6	72.08	50.88	148.4	-18.56	23.49	202.5	419.02	132.84	41.82	143.5
9738.96	3205.36	-24.25	80.34	-33.02	28.62	7.42	51.94	147.34	130.41	-3.14	-93.23	144.32	100.04	-8.98	127.1
8780.52	8324.46	-15.52	120.51	23.32	-3.76	-97.42	-81.32	-110.7	-90.47	28.35	24.3	254.2	28.7	-34.74	502.66
Single Cells
Patient 7: Healthy
120116	139662	278.1	1261.75	993.22	1186.14	699.6	372.06	2801.58	396.09	599.4	1285.47	4701.88	3188.16	1329.22	2288.62
128483	73026	272.95	824	313.76	417.64	2581.1	1769.14	1487.18	1095.93	322.38	3636.09	3046.3	2560.04	1269.36	1214.42
102743	41595.5	244.11	456.29	153.7	265	1323.94	7558.86	911.6	2803.41	760.59	2798.55	1503.88	1129.14	3049.58	747.02
128041	50006.5	234.84	1364.75	280.9	161.12	219.42	363.58	815.14	1363.23	621.27	622.89	1653.12	763.42	2428.02	2139.38
26184.5	43138.5	152.44	809.58	1422.52	6563.52	3394.12	988.98	1804.12	852.12	1253.88	8153.46	1448.94	701.92	608.44	1609.66
7317.24	2266	-25.22	40.17	-42.54	-42.54	-46.3	-168.4	-54.88	-40.69	-34.36	-21.32	158.26	-11.7	61.5	31.16
113113	30804.2	172.01	470.71	1422.52	269.24	601.02	5883	1493.54	2958.12	792.99	4592.7	1281.66	740.46	3070.9	511.68
98430.4	49697.5	203.94	819.88	196.1	228.96	430.36	112.36	804.54	608.31	436.59	527.31	2156.6	767.52	1188.18	1152.1
96941.9	48747.8	191.58	503.67	157.94	186.56	2087.14	609.5	1356.8	623.7	270.54	3753.54	1381.7	1371.86	472.32	678.96
11697	4865.72	81.37	160.68	-6.58	139.92	25.44	-37.84	242.74	-82.57	-36.74	21.87	168.92	38.54	-24.58	91.02
93593.6	91464	259.56	815.76	1037.74	751.54	730.34	285.14	1822.14	274.59	571.05	976.05	4114.76	1892.56	725.7	1758.08
71957.8	33597.6	56.65	1302.95	2592.76	575.58	911.6	9235.78	2252.5	3698.46	769.5	5733.18	2291.9	4199.22	5740.82	1665.42
14240.5	2002.32	-53.41	32.96	44.52	-3.76	-109.76	31.8	85.86	-2.76	43.74	-57.68	231.24	-12.06	26.24	127.1
123871	39076.1	163.77	629.33	1847.58	448.38	404.92	3455.6	1350.44	1902.69	498.15	3277.26	2349.3	997.12	1621.14	775.72
141637	44995.6	122.57	835.33	2681.8	715.5	795	12417.9	2111.52	5588.19	614.79	4535.19	1088.14	1639.18	5983.54	856.08
166375	55503.6	140.08	387.28	161.12	271.36	297.86	601.02	1638.76	268.11	-27.65	639.09	1296.42	587.94	510.86	576.46
84160.4	53389	187.46	501.61	227.9	358.28	439.9	151.58	1891.04	1044.09	462.51	9537.75	2614.98	1177.52	724.06	978.26
3745.56	2210.38	-31.04	-68.99	-7.52	-17.98	81.62	56.18	28.62	11.34	-9.47	76.95	-4.26	-2.72	-52.7	-80.82
106368	158621	277.07	975.41	813.02	586.18	773.8	136.74	1613.32	-16.99	547.56	925.83	4632.18	2079.52	779.82	1841.72
89536.4	61149	275.01	623.15	175.96	310.58	2032.02	393.26	2319.28	677.16	671.49	4478.49	2260.74	1858.12	549.4	1146.36
14096	15121.4	1.03	-4.85	49.82	164.3	2.12	-56.76	-54.88	40.5	-101.13	8.91	-13.24	-17.96	-68.3	0.82
136811	159258	400.67	820.91	1279.42	723.98	625.4	121.9	2422.1	245.43	269.73	1037.61	3731.82	1757.26	678.96	1862.22
85526.3	44050	160.68	932.15	2723.14	616.92	718.68	9064.06	2784.62	4112.37	605.07	4978.26	1751.52	965.96	4051.62	941.36
134955	164164	512.94	901.25	615.86	428.24	608.44	214.12	1537	458.46	413.1	1080.54	4478.02	2136.1	1015.98	1794.98
61091.5	171524	370.8	1440.97	903.12	776.98	1035.62	328.6	4057.68	406.62	737.1	1779.57	7045.44	3649.82	1600.64	2916.74
9790.2	3249.65	63.86	84.46	8.48	42.4	-127.74	-141.96	-102.12	-68.34	40.5	-67.96	228.78	7.38	-40.18	173.02
100448	29960.6	79.31	463.5	1774.44	472.76	544.84	4684.14	1459.62	1969.11	1038.42	4010.31	1267.72	618.28	2319.78	588.76
173371	42524.6	177.16	334.75	3295.54	736.7	244.86	1782.92	2303.38	1102.41	120.69	3960.9	537.92	325.54	1007.78	323.9
4972.8	5139.7	-19.4	46.35	53	151.58	-41.6	108.12	28.62	59.13	-28.84	-33.98	-73.38	19.68	14.76	-20.68
71122	53519.8	207.03	471.74	64.66	161.12	2257.8	8346.44	1733.1	4216.05	1168.02	4074.3	1556.36	1539.14	3950.76	808.52
10825.1	3652.38	-10.67	-0.97	-75.68	32.86	-58.64	40.28	-144.78	-20.13	-1.57	1.62	101.68	112.34	50.84	-172.98
123103	45184	291.49	796.19	209.88	235.32	4565.42	12880.1	2615.02	4746.6	1266.03	4813.83	1700.68	2409.16	5382.48	878.22
134472	172137	390.37	847.69	1000.64	1194.62	1007	502.44	3991.96	338.58	720.9	1918.89	4966.74	2107.4	855.26	1652.3
66996.7	58815.1	289.43	1102.1	206.7	310.58	610.56	396.44	1850.76	311.85	196.02	803.52	2603.5	3710.5	1357.92	1792.52
129998	123795	339.9	703.49	658.26	603.14	608.44	477	3271.16	251.1	228.42	1116.18	3257.04	1360.38	815.08	1271.82
10663	38646.6	2112.53	2492.6	225.78	434.6	1190.38	562.86	5879.82	1830.6	1297.62	12747.8	13216.8	11601.4	6610.02	5016.76
14910.8	6904.09	-29.1	-53.41	-44.42	82.68	-55.82	66.78	-5.64	32.4	31.59	-216.92	30.34	80.36	104.96	-5.44
118878	30669.3	166.86	532.51	2163.46	571.34	643.42	7151.82	2006.58	3235.95	1224.72	4176.36	1714.62	837.22	3465.32	759.32
72663.4	40169	100.94	1377.11	3027.36	689	594.66	7576.88	2747.52	4574.07	763.02	5821.47	1498.96	738.82	5145.5	2190.22
97888.6	54526.1	170.98	1371.96	4127.64	912.66	875.56	13359.2	3439.7	6055.56	1043.28	13018.3	3363.64	3837.6	6967.54	2066.4
89346.6	34341.2	98.88	397.58	116.6	96.46	2169.82	6545.5	905.24	2570.13	447.12	3174.39	1800.72	1638.36	2883.12	632.22
19763.5	5475.48	-5.82	218.36	-80.38	48.76	41.34	104.94	-192.02	41.31	-23.7	43.74	152.52	55.76	26.24	94.3
91411.3	31087.5	135.96	716.88	2493.12	753.66	619.04	9088.44	1785.04	3728.43	1188.27	5515.29	2160.7	1009.42	4031.94	883.14
6380.64	2887.09	-11.64	-107.85	-20.8	16.96	43.46	-50.06	-142.9	51.84	98.82	-21.32	249.28	34.44	17.22	20.5
151468	53792.8	244.11	546.93	251.22	366.76	350.86	152.64	1400.26	470.61	411.48	618.84	1853.2	749.48	654.36	874.94
96063.2	37698	130.81	414.06	102.82	184.44	1663.14	9324.82	1321.82	3517.83	875.61	2943.54	1198.02	1166.86	4011.44	473.96
153357	40277.1	139.05	934.21	3331.58	640.24	675.22	7288.56	2445.42	3083.67	674.73	5631.12	1908.96	1377.6	3868.76	1173.42
166650	50957.2	152.44	210.12	291.5	358.28	782.28	859.66	1814.72	520.83	141.75	2110.86	727.34	557.6	389.5	229.6
67714.9	86148.2	272.95	888.89	161.12	186.56	438.84	121.9	1566.68	68.85	272.97	484.38	3297.22	1906.5	840.5	1827.78
79272.5	91790.5	254.41	5101.59	3899.74	962.48	1545.48	7991.34	2668.02	4192.56	1036.8	5997.24	4310.74	14782.1	11534.9	6836.34
76724.8	187938	430.54	1596.5	1057.88	815.14	969.9	746.24	2492.06	415.53	1207.71	1144.53	5013.48	3291.48	1608.02	2821.62
122088	75030.4	246.17	1367.84	278.78	209.88	607.38	1491.42	2977.54	833.49	822.15	981.72	1726.1	2180.38	1353.82	1667.06
85706	154617	408.91	1356.51	1102.4	1054.7	863.9	598.9	2975.42	522.45	506.25	1177.74	5719.5	2717.48	1138.98	2307.48
132200	29016.1	175.1	578.86	2393.48	536.36	497.14	6691.78	2079.72	3180.87	984.15	4424.22	1886	920.86	3027.44	780.64
213669	74182.7	241.02	661.26	5126.16	1101.34	578.76	409.16	4397.94	711.18	463.32	4840.56	3000.38	1195.56	601.88	749.48
101868	45328.2	132.87	602.55	2550.36	675.22	516.22	4298.3	1845.46	2085.75	581.58	5222.07	1485.02	751.94	1978.66	948.74
110048	49005.3	158.62	541.78	233.2	136.74	1357.86	5834.24	1675.86	3122.55	1095.12	6095.25	1783.5	1298.06	2661.72	810.98
115675	30889.7	177.16	406.85	1733.1	496.08	407.04	3629.44	2376.52	1517.94	243	2067.12	1241.48	470.68	1815.48	606.8
93777.6	55299.7	141.11	1511.01	2888.5	889.34	950.82	9108.58	2496.3	4015.17	906.39	8977.23	2445.24	4376.34	5118.44	2006.54
9540.72	89486.4	331.66	7826.97	7238.74	17107.3	7568.4	2690.28	4888.72	4011.12	43123.6	18954.8	3670.32	2701.9	8067.98	14764.1
133796	44473.3	226.6	634.48	3626.26	1093.92	784.4	9695.82	2388.18	3926.07	944.46	6534.27	1239.84	797.86	3871.22	842.14
10138	38268.6	70.04	26.78	155.82	-53	26.5	30.74	137.8	115.83	12.15	-32.79	13.94	0.82	44.28	128.74
65636.8	144712	400.67	1664.48	1102.4	964.6	1062.12	216.24	3359.14	391.23	733.05	1311.39	5680.14	2452.62	843.78	2626.46
124976	32658.2	158.62	339.9	78.44	189.74	1331.36	4866.46	1663.14	2880.36	461.7	4119.66	1525.2	1081.58	2372.26	819.18
10140.5	14288.2	25.75	491.31	150.52	804.54	470.64	347.68	419.76	86.67	1681.56	863.46	212.38	186.96	154.98	872.48
86078.2	154712	404.79	878.59	1043.04	757.9	749.42	468.52	2488.88	381.51	487.62	956.61	4384.54	2189.4	1037.3	1182.44
6035.4	22359.2	21.63	17.51	-35.96	-66.16	134.62	-111.64	-100.24	14.58	-9.47	-99.56	26.24	-85.08	-98.78	59.04
90909	53124.3	301.79	664.35	252.28	365.7	1769.14	8680.34	1696	3114.45	1372.14	3808.62	2059.02	1567.02	3373.48	1027.46
196972	194004	637.57	2189.78	1738.4	2802.64	2087.14	1069.54	2828.08	737.91	2544.21	1983.69	5289	3165.2	1336.6	3828.58
95826.4	59741	194.67	864.17	180.2	314.82	1644.06	387.96	1876.2	857.79	534.6	6744.06	2433.76	2997.92	952.84	1380.06
125707	38747.6	202.91	400.67	145.22	222.6	1719.32	8219.24	1850.76	3551.04	730.62	5486.13	1481.74	1289.86	3870.4	862.64
13006.6	4131.33	28.84	312.09	-32.08	338.14	27.56	86.92	172.78	-53.73	0.81	288.36	338.66	254.2	214.84	542.84
8898.12	6388.06	-26.19	23.69	125.08	400.68	163.24	-70.98	74.2	0.81	-14.61	-145.39	202.54	7.38	-8.98	41.82
135666	56497.6	170.98	418.18	323.3	273.48	314.82	383.72	1321.82	210.6	70.47	715.23	1510.44	811.8	744.56	929.06
115155	66479.3	204.97	1609.89	2830.2	850.12	876.62	8098.4	3445	3099.06	547.56	5789.88	2965.94	3735.1	4414.88	1515.36
129960	47171.9	198.79	658.17	222.6	368.88	2226	2948.92	1873.02	1824.12	436.59	4206.33	2341.1	1700.68	1468.62	1004.5
111203	49840.7	153.47	1271.02	254.4	256.52	457.92	4205.02	2724.2	2788.02	724.95	5665.14	1187.36	811.8	3936	1993.42
51143.4	33026.9	77.25	434.66	1528.52	303.16	540.6	8230.9	2059.58	3247.29	926.64	5844.15	1441.56	899.54	3449.74	1120.12
64471.7	176240	391.4	1527.49	1365.28	1058.94	1015.48	320.12	3304.02	311.04	933.12	1717.2	5482.52	2530.52	984	2656.8
134844	49046.5	149.35	1044.42	234.26	195.04	3048.56	165.36	2122.12	1239.3	522.45	6804.81	1911.42	2564.14	1647.38	1699.86
134915	34814	194.67	663.32	244.86	144.16	3997.26	8919.9	1072.72	3955.23	709.56	3408.48	924.14	2104.94	4106.56	713.4
134676	142776	462.47	1679.93	1245.5	828.92	789.7	291.5	4185.94	345.87	855.36	1542.24	8778.1	3712.96	1466.16	2901.98
19983.6	4592.77	16.48	45.32	150.52	76.32	79.5	86.92	69.96	172.53	88.29	225.18	135.3	84.46	4.1	28.7
14020.4	3778.04	47.38	35.02	29.68	143.1	308.46	-15.04	-71.92	40.5	62.37	150.66	105.78	200.9	103.32	112.34
95065.3	38614.7	166.86	496.46	144.16	233.2	1337.72	5459	1301.68	1952.91	791.37	4070.25	1681	1144.72	2604.32	633.04
64317.1	63053.5	210.12	861.08	237.44	225.78	415.52	124.02	338.14	388.8	327.24	516.78	2466.56	978.26	936.44	1271
38641.7	33468.8	87.55	797.22	3336.88	2765.54	1288.96	7405.16	2642.58	3291.03	2319.84	7215.48	914.3	634.68	3364.46	1304.62
84061.3	43359.9	59.74	2193.9	4249.54	882.98	1335.6	8346.44	2675.44	3824.01	871.56	8624.88	2416.54	7923.66	6542.78	2933.14
26482.7	48296.7	123.6	728.21	3812.82	1820.02	1158.58	7542.96	2686.04	3590.73	1327.59	7284.33	974.98	652.72	3427.6	1295.6
84214.2	198048	1086.65	3721.39	1443.72	3572.2	2483.58	744.12	3054.92	737.91	7466.58	4062.15	19068.3	8227.88	3594.88	6867.5
8028.72	34731.6	-2.91	-51.47	87.98	109.18	26.5	128.26	-21.74	-129.59	-66.77	-27.65	16.4	30.34	100.04	-87.44
38879.4	73898.4	202.91	1355.48	719.74	1658.9	1306.98	533.18	1171.3	409.86	4514.94	2983.23	2642.04	1999.98	956.12	2045.08
13666	8107.13	77.25	47.38	187.62	12.72	3.18	99.64	10.6	-137.49	-36.74	161.19	254.2	90.2	102.5	293.56
137225	32812.7	132.87	502.64	97.52	248.04	1721.44	5339.22	1620.74	2303.64	579.96	3145.23	1394.82	1199.66	2599.4	564.16
41475	36470.2	90.64	812.67	666.74	3030.54	4436.1	7857.78	2499.48	3615.84	635.85	6258.06	1408.76	1904.86	3592.42	984.82
8297.52	4317.76	-12.61	90.64	3.18	39.22	41.34	-77.56	127.2	-71.91	25.11	50.22	-62.86	97.58	58.22	67.24
106074	53338.6	164.8	2688.3	139.92	207.76	1259.28	689	1264.58	136.08	351.54	396.9	2508.38	11591.5	5067.6	3703.12
15266.2	12553.6	50.47	164.8	130.38	461.1	271.36	100.7	197.16	-27.65	221.94	-122.07	396.88	92.66	16.4	542.02
107296	78810.4	177.16	545.9	188.68	394.32	3915.64	108.12	2635.16	345.06	548.37	5089.23	1982.76	2283.7	513.32	1084.86
109367	85348.9	229.69	591.22	184.44	413.4	436.72	180.2	1650.42	383.94	68.04	814.86	2865.9	1218.52	590.4	1144.72
Single Cells
Patient 8: Healthy
47748.1	37006.9	109.18	710.7	3341.12	4572.84	2663.78	10256.6	2291.72	3888	936.36	4340.79	1029.92	679.78	4100	1106.18
41602.7	51705	173.04	471.74	4191.24	8492.72	3976.06	952.94	1426.76	500.58	665.01	1816.02	1382.52	733.08	359.98	1148.82
39813.5	148564	269.86	3651.35	391.14	484.42	640.24	698.54	3237.24	652.86	1116.18	1487.97	4705.98	2001.62	1350.54	3808.9
137078	55680.8	280.16	798.25	326.48	504.56	507.74	464.28	986.86	368.55	590.49	490.05	2256.64	1189.82	1181.62	1592.44
16715.2	8294.59	-2.91	129.78	96.46	119.78	-70.98	31.8	12.72	-106.27	102.87	-129.59	197.62	-56.6	50.84	223.04
35844.5	23161.6	-17.46	455.26	2164.52	4738.2	2187.84	3295.54	1046.22	1268.46	702.27	4251.69	702.74	553.5	1267.72	662.56
108282	44482.6	162.74	646.84	2831.26	640.24	799.24	7940.46	1883.62	3244.86	425.25	6199.74	1940.94	1043.04	3721.98	870.02
59279.6	51852.3	122.57	802.37	4060.86	6308.06	2887.44	10039.3	1926.02	3730.86	599.4	3393.9	1209.5	624.02	4286.14	1227.54
98239.7	100977	384.19	643.75	1330.3	492.9	558.62	184.44	1259.28	-82.57	266.49	507.87	2682.22	1266.9	637.96	1120.94
18360.7	10304.1	-10.67	189.52	76.32	114.48	63.6	24.38	378.42	-29.22	168.48	358.02	193.52	161.54	136.12	315.7
42704.8	32548	46.35	375.95	3072.94	5101.78	2659.54	6375.9	1370.58	2302.83	353.16	4020.03	451	342.76	2248.44	604.34
67024.4	100775	299.73	13181.9	674.16	775.92	5502.46	2273.7	1600.6	919.35	1638.63	1044.9	22823.1	55748.5	23496.3	17627.5
156923	77458.1	220.42	4194.16	249.1	440.96	1219	1108.76	3246.78	372.6	1358.37	1470.96	3184.88	8432.88	4117.22	4505.08
19147	12166.4	-52.44	66.95	69.96	-19.86	-31.14	-101.18	30.74	8.1	-70.72	136.08	309.96	153.34	-42.54	98.4
100476	122792	247.2	818.85	681.58	644.48	664.62	591.48	2480.4	272.97	343.44	1037.61	3664.58	1903.22	812.62	1482.56
101335	102066	325.48	1035.15	1223.24	800.3	694.3	272.42	2306.56	499.77	389.61	1236.87	5049.56	2492.8	991.38	2059.84
38923.9	70813.5	228.66	1696.41	3518.14	834.22	1259.28	14235.8	4571.78	5964.84	1068.39	7973.64	1672.8	2760.12	6629.7	1928.64
32937.2	85238.7	151.41	756.02	2335.18	8005.12	3883.84	1066.36	1209.46	345.87	1345.41	1475.82	1993.42	810.98	447.72	1353.82
36180.5	41125.8	130.81	826.06	4827.24	5770.64	2891.68	7804.78	2499.48	3697.65	1437.75	9056.61	943.82	678.96	3422.68	1089.78
55477	65033.2	157.59	1197.89	155.82	349.8	2790.98	7438.02	1388.6	3579.39	420.39	2223.45	1509.62	1882.72	4643.66	1257.06
10452.1	8620.07	54.59	188.49	28.62	71.02	32.86	14.84	36.04	85.86	42.12	196.02	363.26	166.46	-60.5	334.56
2325.96	2149.61	-2.91	173.04	189.74	69.96	18.02	-172.16	-100.24	1.62	51.03	105.3	90.2	18.86	-11.7	36.9
53244.2	59459.8	214.24	1617.1	3460.9	682.64	1151.16	9808.18	2219.64	3658.77	1099.17	7446.33	3927.8	5020.86	5451.36	2210.72
180028	35722.5	164.8	958.93	4231.52	839.52	484.42	5828.94	3136.54	2891.7	1042.47	6004.53	706.84	502.66	3976.18	1490.76
168414	51809	172.01	1416.25	147.34	405.98	3614.6	10516.3	3308.26	4352.13	695.79	6662.25	2358.32	6094.24	5940.08	1973.74
9858.24	4861.6	4.12	142.14	33.92	47.7	-37.84	-50.06	-141.96	0.81	19.44	75.33	213.2	170.56	142.68	317.34
125061	81159.9	328.57	1651.09	234.26	344.5	651.9	237.44	802.42	178.2	294.84	436.59	3357.08	3921.24	2100.84	2578.9
27584.8	8705.56	12.36	-52.44	85.86	114.48	81.62	-180.74	-182.62	-55.3	-22.51	113.4	309.14	203.36	32.8	175.48
16950.4	11804.8	33.99	160.68	58.3	186.56	210.94	-30.2	-12.22	150.66	151.47	184.68	337.84	146.78	27.88	311.6
110599	127863	273.98	1400.8	1155.4	954	1082.26	72.08	3367.62	292.41	571.05	1313.01	5609.62	2758.48	926.6	2043.44
3430.56	2685.21	-13.58	-8.73	-116.34	72.08	-44.42	-46.3	-57.7	-118.12	-35.55	-18.56	-12.88	-0.36	77.08	59.86
13078	2036.31	6.18	80.34	-37.84	53	241.68	-116.34	-85.08	-30.41	-62.01	-35.55	181.22	77.9	-100.32	118.9
43591.8	44006.8	161.71	850.78	2717.84	721.86	549.08	9680.98	2012.94	4301.1	526.5	4932.9	1037.3	1491.58	4372.24	850.34
149239	122025	310.03	2361.79	1098.16	748.36	723.98	307.4	2298.08	333.72	942.03	1718.82	7289.8	3153.72	1127.5	4457.52
73279.9	85529.1	198.79	4496.98	3749.22	864.96	1118.3	7183.62	4134	4247.64	1711.53	6261.3	3903.2	6073.74	8764.98	5535
14348.9	9243.22	17.51	-55.35	34.98	21.2	64.66	53	-128.68	-37.12	78.57	-15.8	36.08	-79.64	-174.52	47.56
21391.4	6418.96	35.02	32.96	-113.52	136.74	30.74	112.36	-10.34	-95.61	-52.54	39.69	244.36	88.56	125.46	86.1
98688.2	45988.5	112.27	2997.3	4263.32	993.22	1725.68	9039.68	2651.06	4625.1	1131.57	7865.91	3548.14	11665.3	8801.06	4423.08
143643	127191	386.25	2169.18	2362.74	1513.68	1366.34	577.7	5083.76	384.75	619.65	1786.86	14940.4	6019.62	2556.76	3779.38
96075	34051.8	83.43	2708.9	2554.6	525.76	1381.18	11272	2867.3	4857.57	845.64	8274.15	3096.32	9062.64	8565.72	3464.5
86334.4	58942.8	182.31	968.2	3122.76	686.88	885.1	12234.5	1942.98	5735.61	327.24	5508	2624.82	2156.6	6249.22	1410.4
82898.8	65223.7	265.74	4953.27	4813.46	1041.98	2393.48	16417.3	3380.34	6745.68	846.45	9828.54	5548.94	18009.7	14389.4	6049.96
59020.9	56456.4	214.24	969.23	2099.86	8246.8	3865.82	1294.26	1986.44	297.27	2591.19	3788.37	1655.58	897.9	510.86	2120.52
49255.9	32272	33.99	450.11	2358.5	1746.88	1118.3	5968.86	1639.82	2393.55	945.27	5756.67	1235.74	524.8	2178.74	669.94
14507.6	5465.18	54.59	78.28	117.66	368.88	273.48	174.9	12.72	-55.3	-14.61	101.25	94.3	36.08	-16.78	327.18
10557.1	3643.11	-31.04	867.26	4.24	93.28	-29.26	402.8	14.84	63.18	134.46	78.57	342.76	145.14	196.8	1588.34
66672.5	49019.8	214.24	758.08	53	143.1	2447.54	10529	1578.34	4157.73	1087.02	3761.64	1419.42	1418.6	4491.96	887.24
173512	104280	263.68	925.97	1061.06	923.26	621.16	320.12	1813.66	77.76	369.36	1246.59	3851.54	1934.38	742.1	1319.38
47160.1	43984.1	93.73	1023.82	3966.52	6064.26	3557.36	2211.16	2753.88	994.68	476.28	3564.81	528.08	410	2059.84	1401.38
83307	30992.7	112.27	519.12	46.64	185.5	2274.76	7438.02	1736.28	2888.46	507.87	3483.81	1770.38	1576.86	3330.84	534.64
20459	60154.1	180.25	1339	5106.02	8863.72	4109.62	2028.84	1764.9	1139.67	1063.53	4045.14	2204.98	992.2	1837.62	2061.48
11024.2	2856.19	-5.82	61.8	-25.5	-29.26	155.82	168.54	-45.36	132.84	32.4	-71.1	83.64	194.34	52.48	339.48
166212	77758.8	275.01	942.45	259.7	343.44	362.52	3.18	623.28	423.63	455.22	416.34	2189.4	1182.44	811.8	1760.54
92256.4	42594.6	228.66	340.93	221.54	277.72	447.32	2020.36	1147.98	497.34	78.57	340.2	2011.46	924.14	1246.4	792.94
86143.7	56285.4	273.98	666.41	375.24	268.18	361.46	121.9	483.36	430.11	485.19	368.55	2444.42	920.86	948.74	1579.32
16851.2	26837.7	89.61	305.91	85.86	191.86	216.24	22.26	308.46	127.17	224.37	202.5	986.46	431.32	149.24	693.72
51584.4	66139.4	191.58	1231.88	169.6	319.06	2510.08	12699.9	2010.82	5681.34	788.13	4833.27	3067.62	3005.3	6075.38	1435
139763	49168.1	224.54	1161.84	164.3	403.86	682.64	256.52	1584.7	493.29	500.58	635.85	1462.06	689.62	2045.9	1644.92
75295.1	175972	562.38	1533.67	766.38	751.54	589.36	558.62	2894.86	308.61	638.28	1355.13	5128.28	2191.04	674.04	2981.52
139133	122128	245.14	1422.43	879.8	769.56	886.16	405.98	2149.68	240.57	486.81	1205.28	7806.4	3443.18	1216.88	2326.34
19791.2	4462.99	16.48	268.83	-22.68	-41.6	26.5	-96.48	3.18	-115.36	-22.51	3.24	394.42	177.12	99.22	10.66
107134	32120.5	63.86	1393.59	2125.3	546.96	1090.74	12952.1	2273.7	5031.72	575.91	4227.39	1912.24	5074.98	7165.16	1744.96
85846.3	77280.9	228.66	506.76	2414.68	715.5	130.38	-86.02	1583.64	150.66	302.94	792.18	2480.5	1398.1	658.46	1098.8
74592	42230	173.04	601.52	128.26	214.12	1404.5	8567.98	2266.28	3086.1	758.16	4297.05	2428.84	2107.4	3407.1	1355.46
572.88	27232.2	18.54	-39.83	76.32	152.64	18.02	-145.72	-151.36	-126.83	-87.71	61.56	-7.8	-17.96	116.44	136.12
103131	136194	429.51	1497.62	1117.24	1093.92	991.1	533.18	3011.46	253.53	449.55	1626.48	6306.62	3763.8	1549.8	2906.08
127340	42108.5	156.56	1621.22	4236.82	919.02	645.54	3385.64	2037.32	1897.02	741.15	3984.39	1277.56	638.78	3053.68	1774.48
142983	37457	85.49	472.77	313.76	341.32	1751.12	5481.26	2319.28	2937.06	476.28	3420.63	714.22	1793.34	2785.54	797.86
78161.2	48311.1	100.94	1229.82	302.1	337.08	337.08	51.94	809.84	-101.13	422.01	531.36	1080.76	1662.14	830.66	1398.1
32860.8	20624.7	26.78	238.96	86.92	274.54	121.9	252.28	137.8	170.1	4.05	-14.61	397.7	334.56	41.82	329.64
6319.32	4534.06	-3.88	124.63	126.14	60.42	57.24	-63.34	87.98	-65.58	38.88	-83.76	473.14	124.64	-22.22	212.38
59346.8	58961.3	192.61	943.48	103.88	460.04	249.1	468.52	2980.72	273.78	681.21	873.99	1921.26	803.6	622.38	1135.7
229564	177054	300.76	1117.55	1177.66	949.76	888.28	471.7	3263.74	382.32	607.5	1207.71	5685.06	2671.56	968.42	2163.98
38418.2	20817.3	55.62	621.09	3034.78	4889.78	2159.22	5885.12	2640.46	2975.94	831.06	9897.39	772.44	387.04	2436.22	591.22
28901.9	9456.43	16.48	-5.82	-55.82	163.24	-111.64	-169.34	23.32	127.17	-49.78	31.59	173.84	86.92	-12.88	54.94
119298	44153	191.58	1623.28	4129.76	1028.2	933.86	13096.3	3386.7	5790.69	647.19	4353.75	2370.62	2241.06	7512.02	2455.9
151863	139853	231.75	407.88	1700.24	1121.48	658.26	352.98	4216.68	132.03	305.37	1884.06	1702.32	1166.04	318.16	925.78
11295.5	4144.72	-16.49	320.33	80.56	946.58	345.56	213.06	284.08	-26.46	25.92	200.88	402.62	132.84	54.12	683.06
39197.8	31633.4	109.18	792.07	12.72	338.14	3394.12	6681.18	1428.88	2813.13	756.54	4965.3	1207.04	1799.08	2888.86	756.04
49242.5	45391.1	131.84	449.08	277.72	455.8	333.9	137.8	501.38	115.83	133.65	154.71	1161.94	511.68	419.02	856.9
6709.92	17338	7.21	18.54	67.84	63.6	-134.32	-137.14	16.96	-24.08	41.31	-41.88	58.22	27.88	-118.28	59.04
127548	88537.8	256.47	633.45	718.68	633.88	493.96	458.98	1469.16	253.53	378.27	608.31	2462.46	1240.66	538.74	1254.6
94652	54134.7	130.81	424.36	137.8	126.14	143.1	117.66	1231.72	109.35	245.43	634.23	2163.98	791.3	520.7	726.52
23461.2	7235.75	72.1	211.15	-37.84	-18.92	156.88	45.58	67.84	63.18	60.75	27.54	251.74	56.58	29.52	218.12
23938.3	5958.55	69.01	76.22	3.18	110.24	22.26	-45.36	153.7	130.41	-49.78	80.19	565.8	218.12	6.56	350.96
12142.2	6254.16	24.72	65.92	150.52	648.72	417.64	-55.82	185.5	26.73	-85.33	100.44	351.78	146.78	-9.34	130.38
119121	39630.3	78.28	2604.87	180.2	215.18	415.52	245.92	1082.26	67.23	695.79	518.4	1357.92	3579.3	1845.82	2633.02
207093	63456.2	174.07	5044.94	227.9	257.58	2139.08	3564.78	1288.96	1006.02	208.98	451.17	4656.78	21932.5	10555.9	7020.84
88049.6	70400.5	202.91	4543.33	243.8	355.1	1521.1	8325.24	3244.66	2620.35	886.95	1223.91	2955.28	10642.8	7922.84	4662.52
45523.8	12943	24.72	45.32	10.6	220.48	166.42	-4.7	-3.76	-124.45	-2.76	-53.73	314.06	232.88	126.28	23.78
87179.4	143970	323.42	851.81	2285.36	1070.6	748.36	85.86	5009.56	307.8	556.47	2043.63	3558.8	1645.74	655.18	1585.88
5418	33660.4	38.11	-54.38	-43.48	-43.48	107.06	63.6	-83.2	-20.94	-112.6	-64.39	4.92	57.4	-61.68	14.76
70576.8	41848.9	154.5	329.6	2127.42	484.42	472.76	5118.74	2906.52	2750.76	685.26	7592.94	482.98	330.46	2288.62	715.04
14077.6	5590.84	1.03	133.9	114.48	93.28	-64.28	-33.02	30.74	-81.38	76.95	-5.52	186.96	-57.78	-23.4	100.86
14898.2	4960.48	61.8	72.1	125.08	46.64	-57.7	-112.58	257.58	56.7	-83.76	-47.4	265.68	120.54	65.6	61.5
121902	130778	236.9	975.41	1216.88	763.2	637.06	391.14	2360.62	129.6	506.25	615.6	6189.36	2932.32	1133.24	2316.5
31771.3	80769.5	222.48	1790.14	93.28	218.36	3284.94	9434	1780.8	3632.04	790.56	3185.73	2471.48	6194.28	5645.7	2459.18
72375.2	37952.4	23.69	1447.15	1823.2	465.34	25289.5	11320.8	3372.92	5369.49	864.27	5254.47	1384.98	8838.78	6554.26	2109.86
149009	105516	232.78	1054.72	1152.22	503.5	607.38	207.76	2223.88	456.03	281.07	1319.49	5767.88	2400.14	1168.5	1760.54
15589.6	15320.2	9.27	122.57	54.06	65.72	-125.86	-127.74	-113.52	13.77	-42.26	33.21	428.86	94.3	32.8	262.4
Single Cells
Patient 9: Sarcoidosis
33065.7	5806.35	12.87	117.81	38.5	115.5	17.6	79.2	107.8	79.56	-89.7	-7.02	361.6	77.6	-118.4	63.2
158345	67495.2	292.05	1343.43	293.7	315.7	380.6	414.7	592.9	500.76	666.12	214.5	3221.6	1660.8	1807.2	1995.2
16348.3	5737.05	-61.38	86.13	-33	-26.4	59.4	-117.7	37.4	-7.02	-24.18	-71.76	180.8	4.8	40	-3.2
225038	140538	1310.76	2729.43	3610.2	2752.2	2553.1	1466.3	1764.4	902.46	820.56	681.72	9831.2	7868.8	3835.2	4200.8
152985	108524	391.05	2535.39	1128.6	493.9	1336.5	597.3	753.5	320.58	817.44	547.56	7158.4	9948	4140	3886.4
157986	78574.3	275.22	1966.14	303.6	250.8	2085.6	1542.2	1576.3	1399.32	1035.84	4330.56	4143.2	5102.4	4056	2916.8
217252	163574	2591.82	7792.29	689.7	768.9	1596.1	603.9	2433.2	3483.48	18980.5	7593.3	17652	7728.8	3304.8	15234.4
190885	135940	1605.78	7283.43	963.6	573.1	1618.1	1079.1	2442	1559.22	14069.6	6010.68	17321.6	17832	7696	13308.8
183220	77214.1	264.33	603.9	349.8	333.3	3264.8	2079	2636.7	1428.18	576.42	7168.98	3262.4	2531.2	1174.4	1046.4
114584	37225	128.7	1336.5	129.8	259.6	458.7	187	506	73.32	742.56	530.4	2905.6	4196.8	1736.8	1817.6
18910	7266.6	30.69	-15.84	-49.5	-25.3	118.8	23.1	-52.8	-60.84	7.02	-6.24	258.4	61.6	-44	89.6
243834	122066	356.4	719.73	1283.7	709.5	939.4	709.5	1676.4	231.66	535.08	736.32	6124	2720.8	996.8	1385.6
28873	7178.49	32.67	-42.57	102.3	-31.9	63.8	-12.1	-112.2	-26.52	76.44	-71.76	259.2	60.8	11.2	172.8
63314.7	47556.6	250.47	376.2	385	203.5	216.7	37.4	182.6	145.86	65.52	61.62	1972.8	776	328	589.6
51824	12911.6	94.05	112.86	70.4	134.2	128.7	103.4	2.2	166.14	114.66	152.88	508	258.4	98.4	20
35451.1	9819.81	54.45	30.69	-44	-11	161.7	-84.7	-100.1	146.64	-12.48	-78.78	627.2	312.8	116	296
249528	124662	483.12	6748.83	878.9	622.6	2499.2	1370.6	1256.2	597.48	536.64	571.74	10794.4	25436	10896.8	9061.6
198619	122813	543.51	7534.89	844.8	574.2	2516.8	849.2	793.1	286.26	680.16	497.64	12752	28918.4	12337.6	10292
165679	113718	489.06	8230.86	1175.9	457.6	3040.4	705.1	1185.8	556.92	880.62	368.16	12513.6	29964	12826.4	10576.8
208580	138901	2196.81	11788.9	616	537.9	6361.3	1500.4	2796.2	2795.52	16948.6	7641.66	167229	69980.8	20552	27178.4
155713	59259.4	188.1	783.09	311.3	201.3	1234.2	1574.1	1722.6	1002.3	245.7	3410.94	3244.8	1881.6	1557.6	1040.8
77967.2	19605	95.04	170.28	189.2	102.3	100.1	336.6	-47.3	83.46	-25.74	51.48	719.2	469.6	144.8	244
210552	97059.6	418.77	3197.7	1227.6	466.4	1394.8	586.3	806.3	184.86	340.08	425.88	9933.6	14332.8	5940	5168
140034	64549	324.72	1506.78	366.3	282.7	551.1	352	520.3	1159.86	1000.74	383.76	3591.2	2965.6	3136.8	2714.4
50181.5	17042.8	42.57	103.95	68.2	29.7	44	-66	-37.4	187.2	12.48	-22.62	886.4	446.4	136.8	208
217557	115061	523.71	6155.82	644.6	458.7	2361.7	1129.7	678.7	354.12	1009.32	580.32	10544.8	25562.4	10704	9180.8
212778	97043.8	421.74	9886.14	688.6	382.8	3390.2	1439.9	1028.5	370.5	641.94	563.16	12180.8	37889.6	16376.8	12674.4
40194.8	17510.1	18.81	77.22	68.2	-6.6	-28.6	44	-121	145.08	-14.82	131.04	549.6	161.6	-27.2	36.8
154308	84907.4	253.44	851.4	466.4	249.7	1963.5	2328.7	1800.7	883.74	481.26	5219.76	4024.8	2474.4	1526.4	1560
35865.2	11533.5	54.45	59.4	85.8	18.7	-34.1	9.9	165	-102.18	-28.86	83.46	604	274.4	153.6	160
10424.7	4460.94	44.55	123.75	5.5	18.7	-41.8	31.9	-118.8	86.58	-39	-46.8	163.2	-32	-92	-160.8
109728	71111.7	156.42	2711.61	150.7	176	803	501.6	1408	196.56	883.74	841.62	3556	7031.2	3099.2	2820
16764.1	6934.95	20.79	-99.99	133.1	26.4	20.9	-18.7	-37.4	-17.94	124.02	10.14	346.4	121.6	-56.8	62.4
249676	139427	487.08	5278.68	1378.3	553.3	2189	590.7	1193.5	507	720.72	546.78	11750.4	21653.6	9148	7814.4
28899.3	6083.55	1.98	94.05	48.4	100.1	-35.2	61.6	40.7	-8.58	-30.42	33.54	220	193.6	124	92.8
46981.1	16539.9	90.09	179.19	28.6	95.7	60.5	-61.6	113.3	-35.1	-70.98	30.42	596	219.2	-93.6	228.8
16220.4	4720.32	14.85	-24.75	48.4	-17.6	105.6	-90.2	-91.3	34.32	-45.24	3.9	175.2	50.4	99.2	-53.6
132644	101850	528.66	5784.57	1395.9	514.8	1884.3	1059.3	619.3	367.38	366.6	667.68	9487.2	23652	9928	7805.6
15994.1	7720.02	36.63	131.67	-77	64.9	327.8	52.8	-8.8	35.88	161.46	45.24	410.4	315.2	8.8	141.6
10140.1	4784.67	41.58	-70.29	24.2	19.8	-25.3	70.4	2.2	-3.12	-75.66	-3.12	129.6	27.2	-35.2	122.4
132318	71413.6	417.78	1346.4	357.5	385	474.1	388.3	480.7	652.08	641.16	360.36	5044.8	2401.6	1266.4	2534.4
65929.6	12930.4	40.59	114.84	124.3	49.5	11	166.1	-37.4	21.84	117	127.14	680	200.8	142.4	176
164116	158857	1277.1	4640.13	775.5	622.6	1227.6	662.2	2036.1	922.74	14187.4	6391.32	13460	10881.6	4476	10140
24189.2	5621.22	40.59	-28.71	71.5	48.4	282.7	104.5	-105.6	89.7	217.62	121.68	420.8	255.2	30.4	116
19493	6265.71	25.74	160.38	-6.6	58.3	-15.4	57.2	1.1	-88.92	3.12	-67.86	312	123.2	-94.4	96.8
51813.3	36098.4	99.99	296.01	151.8	48.4	50.6	242	49.5	63.18	53.82	89.7	1738.4	720.8	362.4	600.8
75805.7	33174.9	124.74	60.39	205.7	211.2	122.1	16.5	85.8	82.68	122.46	167.7	2004.8	738.4	344.8	285.6
24599.2	11575.1	47.52	11.88	137.5	91.3	1.1	50.6	60.5	-49.14	2.34	95.94	466.4	231.2	63.2	65.6
41328.8	10421.7	18.81	150.48	111.1	116.6	101.2	44	45.1	185.64	92.82	-1.56	456.8	131.2	-24	292
231005	118266	510.84	12163.1	1688.5	643.5	4339.5	1672	1191.3	567.06	903.24	933.66	17551.2	45805.6	19301.6	14835.2
233994	155585	570.24	6517.17	1206.7	569.8	2297.9	1028.5	958.1	597.48	782.34	480.48	12453.6	27196	11412	9544
130995	62221.5	216.81	730.62	218.9	217.8	312.4	191.4	277.2	275.34	478.14	-14.82	2953.6	1336.8	1119.2	1391.2
255609	128673	1183.05	8318.97	572	480.7	2390.3	1075.8	1904.1	864.24	11435.6	4844.58	15144.8	23336	9892	13212
124273	129015	407.88	4462.92	1415.7	508.2	1524.6	600.6	1326.6	437.58	587.34	587.34	10322.4	16477.6	6740	6052
21940.7	6738.93	40.59	-75.24	83.6	-11	8.8	-130.9	301.4	6.24	-65.52	-10.92	201.6	53.6	39.2	22.4
260330	122088	446.49	2355.21	1724.8	665.5	1040.6	440	1651.1	209.82	496.08	965.64	7420	8356	3284.8	3472.8
144940	42387.8	148.5	4404.51	176	141.9	1434.4	557.7	1158.3	127.92	910.26	978.12	4808.8	15584	6768	6012.8
124346	68473.4	269.28	1570.14	293.7	311.3	463.1	200.2	903.1	1228.5	914.16	445.38	3357.6	1410.4	2992.8	2929.6
17627.5	5194.53	3.96	99.99	101.2	70.4	3.3	-61.6	-46.2	-60.84	128.7	20.28	458.4	194.4	36.8	12
92568.2	21167.2	45.54	298.98	272.8	117.7	107.8	149.6	254.1	116.22	152.1	181.74	1304.8	702.4	248	388.8
221006	133812	619.74	3090.78	1497.1	709.5	1409.1	754.6	1084.6	340.86	424.32	767.52	10772	12859.2	5235.2	4636
59910.8	14363.9	88.11	113.85	83.6	42.9	246.4	-5.5	-27.5	133.38	102.18	50.7	868	292.8	-88	212.8
20323.7	51064.2	-31.68	40.59	25.3	9.9	52.8	-15.4	-62.7	175.5	33.54	19.5	140	69.6	-44	87.2
230026	109313	477.18	9018.9	1138.5	574.2	3243.9	1603.8	770	335.4	707.46	564.72	13152.8	37273.6	15983.2	12407.2
21337.2	6887.43	-36.63	17.82	72.6	-5.5	-72.6	-111.1	41.8	15.6	58.5	27.3	292	208.8	158.4	190.4
27265.8	7570.53	40.59	101.97	33	117.7	-70.4	34.1	-86.9	44.46	119.34	73.32	189.6	127.2	169.6	47.2
161419	88713.9	298.98	7920.99	869	334.4	2480.5	948.2	932.8	404.82	906.36	849.42	11437.6	33302.4	14092.8	11290.4
17380.7	4809.42	32.67	3.96	-4.4	116.6	-4.4	-62.7	-28.6	-116.22	60.84	139.62	176	84	-52	32
41914.3	26210.2	57.42	977.13	140.8	154	202.4	90.2	446.6	287.82	1985.1	2159.82	2052.8	1168.8	469.6	1530.4
40804	9394.11	12.87	39.6	102.3	0	79.2	42.9	-15.4	61.62	50.7	60.84	237.6	145.6	35.2	226.4
53673.9	10804.9	17.82	141.57	108.9	20.9	108.9	204.6	-13.2	23.4	-46.8	-67.08	560.8	188	111.2	-9.6
12108.9	6043.95	2.97	19.8	-69.3	15.4	48.4	8.8	-104.5	-114.66	35.88	-85.8	295.2	158.4	177.6	136.8
176204	118205	538.56	5430.15	913	576.4	1821.6	554.4	558.8	463.32	444.6	359.58	9523.2	20820.8	8996.8	7412
6938.84	3141.27	-2.97	51.48	57.2	-44	-8.8	-104.5	174.9	-4.68	-61.62	18.72	106.4	188	-54.4	-13.6
34466.2	12423.5	20.79	61.38	-19.8	24.2	146.3	-62.7	23.1	-76.44	-105.3	-11.7	432.8	189.6	160.8	188.8
204368	85138	403.92	4196.61	532.4	443.3	1760	884.4	676.5	561.6	1575.6	1120.08	8964	17405.6	7276.8	6169.6
156967	68754.5	275.22	831.6	442.2	419.1	368.5	271.7	245.3	307.32	419.64	258.96	2964	1169.6	548	1009.6
27516.7	9604.98	19.8	129.69	64.9	25.3	125.4	1.1	-82.5	70.2	10.14	10.14	456	32.8	64	44
17883.4	3658.05	-32.67	17.82	25.3	38.5	20.9	-163.9	-42.9	-5.46	-31.98	62.4	30.4	24	-37.6	-45.6
103614	53735.2	209.88	387.09	342.1	194.7	399.3	67.1	129.8	134.16	289.38	204.36	2146.4	927.2	378.4	497.6
10609.2	4851.99	30.69	10.89	-63.8	-42.9	-5.5	9.9	37.4	-31.98	31.2	9.36	40.8	100	9.6	8
8190.98	8825.85	33.66	111.87	61.6	-49.5	67.1	63.8	-47.3	-86.58	7.8	28.86	344	69.6	246.4	106.4
55548.4	18971.4	56.43	151.47	132	95.7	167.2	28.6	-144.1	49.92	14.04	-17.16	825.6	297.6	-57.6	278.4
191502	73100.6	419.76	1188.99	254.1	179.3	548.9	211.2	465.3	468.78	535.86	346.32	3884.8	2701.6	1744.8	2034.4
9220.08	4168.89	104.94	-31.68	135.3	7.7	56.1	-71.5	58.3	-0.78	68.64	-58.5	133.6	24.8	58.4	-84.8
9530.86	6213.24	26.73	-35.64	147.4	161.7	35.2	13.2	-57.2	3.12	41.34	-97.5	190.4	-40.8	-52.8	-5.6
15058.5	6372.63	57.42	101.97	-25.3	-11	49.5	38.5	115.5	-14.04	-67.86	84.24	76.8	-40	22.4	79.2
66108.4	15685.6	49.5	-54.45	57.2	8.8	46.2	-39.6	-31.9	88.92	46.8	-99.06	1631.2	736.8	280	332.8
35161.6	11021.7	56.43	264.33	85.8	66	146.3	202.4	-67.1	127.92	38.22	-52.26	670.4	262.4	108	510.4
234636	209573	807.84	8479.35	1931.6	1282.6	3560.7	1811.7	1955.8	1005.42	4946.76	2927.34	17636	32388.8	14181.6	12033.6
29737.3	12451.2	8.91	85.14	42.9	106.7	23.1	-108.9	92.4	166.92	6.24	-99.06	542.4	144.8	28	33.6
20566.4	5350.95	9.9	-37.62	28.6	48.4	-36.3	-7.7	-41.8	53.82	73.32	60.84	68	58.4	7.2	206.4
11267.6	3936.24	-11.88	6.93	-47.3	15.4	-152.9	84.7	-86.9	92.04	-102.18	-7.8	240.8	160	-30.4	153.6
57700.9	21488	142.56	101.97	275	155.1	171.6	195.8	100.1	87.36	141.96	99.84	801.6	393.6	81.6	316
16140.9	5750.91	14.85	72.27	-28.6	-5.5	63.8	81.4	-55	55.38	88.14	111.54	131.2	168.8	-22.4	218.4
201494	104713	422.73	5971.68	1281.5	466.4	2072.4	938.3	610.5	382.98	546.78	361.92	9238.4	23168	9926.4	7800.8
245437	146280	1419.66	9127.8	766.7	663.3	2970	1580.7	2379.3	1445.34	13621.1	6524.7	16112	25263.2	10468.8	13834.4
53671.5	21176.1	86.13	287.1	141.9	193.6	81.4	61.6	-33	192.66	95.94	172.38	620	295.2	-13.6	492
15740.7	13720.4	87.12	144.54	-44	70.4	75.9	18.7	39.6	1.56	42.9	116.22	463.2	180	-19.2	300.8
13452.9	11839.4	128.7	192.06	287.1	234.3	165	121	-92.4	-28.08	32.76	3.9	884.8	350.4	138.4	260
Single Cells
Patient 10: Sarcoidosis
18494.7	12138.4	-13.86	184.14	128.4	23.54	-34.24	-33.17	-47.08	-63.91	-107.03	107.8	-107.2	-9.6	-24.8	110.4
24264.4	11162.2	58.41	94.05	50.29	65.27	89.88	-67.41	-23.54	-11.55	230.23	-41.58	115.2	125.6	84	247.2
75906.7	46214.2	161.37	5502.42	140.17	283.55	1463.76	1262.6	1562.2	618.31	1355.2	652.19	2984.8	15204	6708.8	5708.8
23899.9	5527.17	-13.86	-179.19	39.59	69.55	-17.12	-13.91	94.16	50.05	117.04	-102.41	59.2	128	12.8	19.2
35407.5	13830.3	24.75	115.83	129.47	2.14	133.75	200.09	-179.76	102.41	103.18	-8.47	94.4	89.6	110.4	-56
17536.5	6542.91	49.5	222.75	-10.7	62.06	-9.63	16.05	-6.42	-100.1	94.71	-44.66	188.8	173.6	10.4	100.8
8607.06	3103.65	26.73	246.51	67.41	54.57	-46.01	-156.22	-56.71	154	163.24	70.84	-9.6	-21.6	-26.4	0
15213.4	5333.13	-5.94	68.31	84.53	-194.74	-93.09	83.46	-49.22	-108.57	164.78	6.93	182.4	140	-63.2	83.2
25718.3	50529.6	72.27	74.25	146.59	138.03	90.95	202.23	10.7	-14.63	79.31	-61.6	117.6	108	11.2	53.6
7166.88	2291.85	10.89	-39.6	18.19	84.53	1.07	38.52	-51.36	119.35	-19.25	-48.51	-52.8	38.4	-5.6	81.6
68159.9	40063.3	131.67	316.8	284.62	85.6	329.56	238.61	98.44	10.01	160.93	38.5	624.8	336	84.8	723.2
20937.7	11556.3	14.85	31.68	65.27	-7.49	-22.47	22.47	-131.61	-197.12	-3.85	-61.6	-5.6	-67.2	-66.4	53.6
52873.6	22655.2	21.78	463.32	100.58	100.58	190.46	-55.64	83.46	-31.57	-73.15	-121.66	259.2	121.6	77.6	585.6
25771.8	8795.16	27.72	-95.04	153.01	73.83	-82.39	-31.03	-1.07	10.01	-60.06	-115.5	83.2	26.4	136	-84.8
41637.2	13099.7	22.77	31.68	86.67	39.59	20.33	126.26	71.69	67.76	84.7	16.17	134.4	67.2	-20	320
17575.4	10365.3	48.51	103.95	33.17	215.07	17.12	-104.86	-73.83	81.62	5.39	100.87	217.6	7.2	8	100.8
11672.9	5086.62	-11.88	105.93	104.86	13.91	-67.41	-17.12	69.55	43.12	-74.69	-72.38	201.6	47.2	-28	350.4
7028.37	4548.06	9.9	53.46	-68.48	123.05	86.67	101.65	-77.04	171.71	166.32	57.75	126.4	42.4	119.2	2.4
28540.3	11776	50.49	117.81	64.2	111.28	55.64	-136.96	32.1	237.93	103.18	93.94	89.6	107.2	84	218.4
38961.8	14026.3	45.54	230.67	-32.1	84.53	-86.67	180.83	206.51	16.17	129.36	25.41	244.8	96.8	143.2	445.6
15585.2	6647.85	0.99	297	-78.11	180.83	2.14	-110.21	22.47	-54.67	44.66	33.88	86.4	52	25.6	435.2
16213.8	8332.83	32.67	-43.56	-147.66	-59.92	60.99	-5.35	-51.36	-106.26	-130.9	23.1	37.6	44	145.6	32
12905.7	4986.63	30.69	37.62	-28.89	-108.07	-124.12	-121.98	-119.84	-156.31	-41.58	-45.43	68.8	-8	-56.8	-168.8
18320.6	8414.01	64.35	123.75	12.84	119.84	37.45	-10.7	93.09	57.75	85.47	34.65	269.6	108	3.2	-48.8
29113	8753.58	59.4	16.83	88.81	84.53	73.83	86.67	-8.56	-12.32	-64.68	12.32	76	7.2	4.8	0
170499	118555	385.11	1043.46	1460.55	895.59	1009.01	741.51	1693.81	267.19	622.93	538.23	2871.2	1312	625.6	2395.2
12302.3	7441.83	-28.71	108.9	21.4	34.24	72.76	-69.55	44.94	20.79	-28.49	-50.05	20	-35.2	-69.6	106.4
23161.1	11345.4	-14.85	94.05	2.14	145.52	77.04	188.32	78.11	-64.68	-70.84	100.1	-68.8	43.2	162.4	155.2
12196.2	5784.57	61.38	23.76	0	5.35	36.38	57.78	162.64	-53.9	1.54	1.54	4.8	24.8	-126.4	3.2
92359.4	57063.6	236.61	5807.34	292.11	192.6	1669.2	1184.49	1927.07	169.4	1149.61	643.72	3431.2	17967.2	8196	6696
26156.5	12194.8	68.31	172.26	-67.41	-25.68	170.13	118.77	-94.16	-53.9	41.58	59.29	283.2	69.6	162.4	244
41127.8	27710.1	91.08	254.43	338.12	71.69	221.49	5.35	-53.5	240.24	91.63	90.86	451.2	320	108.8	184
9719.19	3262.05	7.92	-135.63	-10.7	-8.56	-64.2	40.66	-121.98	78.54	-95.48	-3.85	108	43.2	68	176
7497.36	5542.02	0	52.47	-57.78	51.36	-22.47	2.14	247.17	103.95	-29.26	89.32	150.4	68	110.4	279.2
10472.5	7209.18	-25.74	102.96	123.05	-80.25	62.06	-26.75	35.31	47.74	7.7	-35.42	128	-4	-17.6	190.4
3817.53	3540.24	-25.74	55.44	-22.47	-6.42	139.1	-173.34	40.66	49.28	40.04	-123.97	172.8	61.6	-85.6	239.2
17472.5	7767.54	-17.82	-86.13	-34.24	-62.06	27.82	50.29	12.84	204.82	-22.33	-48.51	126.4	24	99.2	312.8
9923.31	3218.49	-35.64	38.61	34.24	-24.61	126.26	-38.52	48.15	39.27	-102.41	43.12	-41.6	28.8	111.2	48
17104	6494.4	0	-41.58	-48.15	-42.8	67.41	25.68	-32.1	-142.45	-110.11	-28.49	-65.6	0.8	-212	4.8
41080	14289.7	48.51	152.46	123.05	101.65	79.18	173.34	111.28	78.54	11.55	98.56	182.4	41.6	73.6	267.2
8846.01	3710.52	44.55	322.74	75.97	116.63	187.25	741.51	321	424.27	288.75	89.32	120	67.2	544.8	424
12222.9	5575.68	30.69	62.37	17.12	-63.13	-44.94	23.54	156.22	-29.26	-121.66	57.75	24.8	-36.8	68.8	118.4
6731.1	4206.51	-26.73	65.34	17.12	-14.98	-7.49	-29.96	-35.31	16.94	10.01	-45.43	-33.6	-104	-28	173.6
20245.1	13227.4	-58.41	52.47	69.55	25.68	-14.98	77.04	-126.26	49.28	9.24	-65.45	137.6	33.6	-102.4	140.8
4399.11	6324.12	14.85	116.82	-29.96	24.61	-9.63	43.87	5.35	49.28	94.71	94.71	-10.4	67.2	-137.6	-63.2
120904	61017.7	208.89	4112.46	228.98	128.4	1087.12	501.83	1407.05	376.53	1255.1	691.46	2092	9470.4	4797.6	4505.6
30242.2	11241.5	14.85	191.07	-13.91	115.56	153.01	-178.69	96.3	67.76	-70.07	26.18	260	-25.6	-52.8	140
86601.1	56411.2	223.74	3060.09	300.67	116.63	2153.91	2543.39	2710.31	1311.31	1104.95	2179.87	1043.2	1348	3011.2	2994.4
7152.3	5179.68	34.65	-23.76	-17.12	34.24	73.83	-41.73	-90.95	20.79	-2.31	-44.66	17.6	115.2	51.2	-28.8
19050.4	7281.45	44.55	-36.63	54.57	123.05	99.51	32.1	60.99	48.51	26.18	32.34	-71.2	48.8	104.8	107.2
25976.7	6912.18	15.84	72.27	34.24	64.2	25.68	84.53	-54.57	-103.95	80.08	-29.26	58.4	172.8	-17.6	140.8
5209.92	2662.11	16.83	39.6	39.59	-1.07	-27.82	95.23	215.07	-84.7	-35.42	53.13	7.2	-28	-60.8	-124.8
31155.8	15762.8	47.52	209.88	69.55	74.9	92.02	47.08	-191.53	-80.08	-96.25	45.43	75.2	-8.8	-9.6	144
15102.5	155356	61694.8	7888.32	23937	39290.4	13544.1	4559.27	1423.1	9673.51	8776.46	3633.63	68168	33979.2	18082.4	16152
10288.6	37063.6	-12.87	-161.37	155.15	136.96	112.35	21.4	16.05	-113.96	-26.95	-27.72	-173.6	-20	-16	0.8
36831.5	14261	48.51	194.04	144.45	16.05	24.61	35.31	159.43	46.2	45.43	7.7	180.8	22.4	-4	164
18926.5	5147.01	-16.83	60.39	20.33	17.12	80.25	-175.48	-81.32	-16.94	104.72	13.86	-132	57.6	-74.4	-30.4
13385.2	5984.55	16.83	31.68	78.11	20.33	-17.12	-18.19	113.42	-71.61	79.31	83.93	5.6	64	-32	108.8
6453.27	4598.55	22.77	-30.69	151.94	62.06	19.26	-148.73	-119.84	168.63	102.41	-6.16	-136	-12	-13.6	28.8
147107	98777.2	412.83	6894.36	982.26	620.6	2280.17	968.35	834.6	110.11	812.35	464.31	6101.6	23628.8	10653.6	9212.8
102642	53667.9	161.37	2244.33	207.58	217.21	549.98	568.17	1568.62	179.41	967.12	435.05	1100	3215.2	1801.6	1932
19858	11478.1	61.38	171.27	39.59	54.57	-83.46	147.66	-10.7	-82.39	18.48	138.6	199.2	-11.2	3.2	164
92536.8	68324.9	327.69	9068.4	4669.48	906.29	2363.63	6594.41	2777.72	2689.61	1507.66	5703.39	5736	31175.2	16004.8	10926.4
23405.8	9732.69	-9.9	23.76	125.19	8.56	206.51	55.64	-69.55	121.66	92.4	-7.7	38.4	97.6	-56.8	168.8
20442	8204.13	34.65	65.34	31.03	98.44	-2.14	-110.21	-13.91	-35.42	87.78	-4.62	107.2	-40.8	40	306.4
125558	56729	197.01	6800.31	298.53	184.04	1883.2	815.34	1459.48	251.02	1583.12	770.77	4015.2	20908	9551.2	7902.4
44921.8	17378.5	96.03	202.95	150.87	124.12	77.04	32.1	9.63	264.11	146.3	100.87	126.4	96	-16	264.8
11316.5	3772.89	-24.75	96.03	115.56	-48.15	-53.5	-125.19	2.14	-82.39	67.76	86.24	104.8	71.2	-8.8	103.2
14234.1	10448.5	-9.9	75.24	-57.78	114.49	-64.2	83.46	-222.56	-25.41	80.85	-85.47	267.2	0.8	52.8	116
139502	136932	439.56	4728.24	1741.96	788.59	1407.05	877.4	1247.62	595.21	1255.87	838.53	6066.4	11125.6	5017.6	7580.8
145225	81462.1	355.41	1899.81	291.04	401.25	301.74	271.78	224.7	1044.12	751.52	332.64	1504.8	885.6	2521.6	3024.8
30740.3	12753.2	13.86	1.98	14.98	-111.28	126.26	253.59	-22.47	-11.55	16.17	-65.45	80	24	177.6	169.6
145334	128257	510.84	1981.98	1448.78	749	767.19	404.46	1627.47	165.55	1133.44	999.46	3220	1700	845.6	3152
11140.7	4709.43	-13.86	-23.76	63.13	-32.1	-31.03	-157.29	-140.17	-75.46	29.26	-92.4	-37.6	30.4	151.2	136
13812.9	9341.64	70.29	-98.01	-1.07	-20.33	8.56	-105.93	22.47	-170.94	-58.52	-65.45	158.4	44	-1.6	192
74569.4	16609.2	108.9	39.6	80.25	159.43	86.67	-34.24	240.75	25.41	110.11	133.21	165.6	24.8	-1.6	-137.6
6827.49	3860.01	63.36	145.53	34.24	-10.7	17.12	-14.98	99.51	-26.18	47.74	-62.37	33.6	37.6	-24.8	140.8
19470	5760.81	27.72	-74.25	11.77	-31.03	-29.96	-58.85	-190.46	-80.85	-106.26	-103.95	52.8	12	22.4	179.2
20635.6	10108.9	70.29	90.09	1.07	26.75	56.71	-26.75	96.3	-45.43	35.42	19.25	168.8	128.8	56.8	-24
91699.3	51155.3	197.01	451.44	267.5	260.01	376.64	238.61	135.89	104.72	816.97	506.66	631.2	511.2	260	732.8
54539.7	13638.2	59.4	219.78	43.87	131.61	86.67	-18.19	118.77	83.93	85.47	110.11	275.2	105.6	40.8	77.6
11176.4	5678.64	-17.82	50.49	48.15	74.9	56.71	-28.89	53.5	19.25	42.35	-17.71	235.2	31.2	-22.4	-72.8
17787.6	4970.79	13.86	-38.61	140.17	57.78	-63.13	172.27	-47.08	22.33	-26.95	84.7	228.8	53.6	104	132
22061.2	8637.75	42.57	-48.51	-26.75	68.48	84.53	-42.8	192.6	26.18	83.93	-67.76	-114.4	-20.8	85.6	-74.4
113136	42057.2	117.81	4191.66	2725.29	692.29	1091.4	6951.79	3342.68	3270.96	823.9	6970.04	2499.2	10180.8	7589.6	4476
33061	8458.56	56.43	-22.77	199.02	63.13	121.98	87.74	-36.38	208.67	35.42	-85.47	-79.2	-98.4	52.8	-161.6
10257.8	7660.62	29.7	-1.98	94.16	20.33	12.84	-33.17	-82.39	-15.4	35.42	-35.42	-24	61.6	96.8	-72
20097.7	6010.29	22.77	-68.31	94.16	11.77	-58.85	20.33	-2.14	-91.63	-116.27	32.34	-113.6	-59.2	25.6	-14.4
23323.9	12632.4	17.82	254.43	56.71	24.61	-37.45	-55.64	32.1	7.7	22.33	1.54	203.2	131.2	-36	215.2
15313	7266.6	34.65	71.28	59.92	68.48	92.02	34.24	40.66	-107.8	18.48	-115.5	146.4	170.4	-31.2	-96
13453.3	3436.29	20.79	32.67	102.72	-9.63	-12.84	-289.97	189.39	18.48	3.85	-126.28	147.2	77.6	39.2	24.8
30417.1	14096.6	-7.92	12.87	52.43	44.94	164.78	-25.68	-82.39	112.42	127.82	59.29	53.6	130.4	-51.2	48
165488	94102.5	493.02	2271.06	1410.26	527.51	853.86	623.81	1445.57	217.14	1034.11	782.32	2382.4	5047.2	2333.6	3682.4
11041.1	5386.59	-16.83	77.22	-28.89	58.85	-190.46	-52.43	-23.54	-10.78	-121.66	-20.79	-84.8	-124	-153.6	-41.6
38769	8526.87	-12.87	23.76	97.37	60.99	-95.23	-38.52	13.91	-63.91	-50.05	-95.48	-106.4	-11.2	240.8	-114.4
3956.04	4365.9	85.14	-41.58	47.08	-25.68	0	-56.71	39.59	6.93	60.06	-5.39	184	22.4	193.6	-212.8
76412.2	41652.3	107.91	4741.11	92.02	111.28	2819.45	3191.81	1122.43	1536.15	1327.48	2862.09	3982.4	19305.6	9970.4	6621.6
6902.82	3698.64	-31.68	19.8	-113.42	-31.03	-32.1	-26.75	-33.17	-19.25	117.81	-96.25	-29.6	83.2	-12.8	-4.8
28584.1	13043.2	19.8	20.79	-56.71	0	23.54	-113.42	-154.08	-31.57	108.57	13.09	-4.8	57.6	-59.2	89.6
68117.8	73323.4	211.86	3443.22	330.63	174.41	831.39	2872.95	1434.87	1274.35	974.82	544.39	2052	5228	3914.4	3713.6
Single Cells
Patient 11: Sarcoidosis
97613.1	64670.8	106.92	3010.59	1614.08	395.2	1305.2	3732.56	2007.2	1794.1	597.52	2937.55	4529.86	10354.5	6064.04	4184.63
17057	31612.7	10.89	834.57	200.72	685.36	443.04	449.28	716.56	456.61	1042.58	1471.47	2736.56	1462.29	744.18	1734.84
155951	180853	1229.58	6466.68	664.56	763.36	1531.92	895.44	4866.16	1887.27	7412.02	5031.95	18774.3	8963.34	3688.51	15040.8
18070.3	182132	826.65	4858.92	740.48	645.84	2243.28	3204.24	3560.96	1898.05	4211.13	2918.3	12168.4	7009.67	3538.41	9750.18
138738	149734	787.05	6950.79	542.88	539.76	1864.72	917.28	3557.84	1081.08	2883.65	2745.05	16311.9	16430.4	6988.34	12541.2
62651.1	162935	351.45	3389.76	407.68	432.64	656.24	191.36	2360.8	609.84	1956.57	2112.11	7681.96	3768.3	1399.88	6790.84
96458.9	156949	1103.85	5907.33	630.24	712.4	1445.6	563.68	3470.48	1481.48	4832.52	3337.95	13898.5	9373.35	3683.77	12138.4
133433	134606	600.93	3266.01	334.88	437.84	867.36	529.36	1764.88	573.65	2984.52	2354.66	9480	5359.36	2180.4	7197.69
124712	158145	1025.64	7742.79	1498.64	847.6	1631.76	827.84	5572.32	1764.84	4265.03	3367.98	22040.2	12121.8	4494.31	15283.3
26761.6	10147.5	9.9	167.31	1.04	37.44	131.04	-19.76	30.16	-49.28	22.33	36.19	346.02	99.54	-30.81	280.45
95102.9	90400.9	156.42	727.65	141.44	263.12	1651.52	365.04	2174.64	387.31	324.17	2988.37	5119.2	2627.54	831.87	1962.36
229226	170937	990	7024.05	560.56	705.12	1499.68	849.68	5461.04	1429.89	3951.64	3622.08	18938.7	10572.6	4594.64	14917.6
122981	149867	1007.82	5582.61	452.4	646.88	1437.28	486.72	4371.12	1211.98	3833.06	3448.06	17761.6	9768.35	3805.43	12896.8
201581	124794	630.63	4154.04	764.4	648.96	1106.56	638.56	3679.52	1170.4	3303.3	2576.42	11945.6	6005.58	2346.3	9111.07
108126	136313	711.81	4707.45	414.96	516.88	934.96	303.68	3274.96	870.1	3011.47	2632.63	13415.8	6575.17	2536.69	9562.95
72743.7	80122.7	178.2	3244.23	284.96	325.52	1282.32	583.44	1223.04	398.09	330.33	622.16	5014.13	11826.3	5599.52	4954.09
124005	144116	203.94	3252.15	828.88	565.76	1751.36	1886.56	3006.64	603.68	649.11	1490.72	13486.1	10105.7	4416.1	5822.3
190378	159037	851.4	5171.76	796.64	540.8	1129.44	352.56	3697.2	1450.68	3631.32	3035.34	13735.7	6659.7	2481.39	10826.2
156055	59138.6	221.76	1819.62	1434.16	487.76	892.32	4709.12	2203.76	1479.17	429.66	2735.81	4362.38	4808.73	3625.31	2729.45
198640	158044	599.94	4050.09	583.44	553.28	1094.08	464.88	3265.6	886.27	2306.92	1981.98	13988.5	6144.62	2215.16	8723.18
133941	172940	808.83	5358.87	529.36	490.88	1813.76	1880.32	3811.6	1685.53	3667.51	2717.33	14528.1	8167.81	3544.73	10009.3
147729	160359	480.15	4036.23	752.96	1728.48	1669.2	761.28	2255.76	788.48	2702.7	1841.84	13975.9	6091.69	2738.93	8144.11
10950.4	31097.9	36.63	-119.79	135.2	-72.8	11.44	-111.28	-107.12	23.1	-131.67	1.54	-97.17	-57.67	125.61	60.04
137875	150497	847.44	4919.31	364	488.8	1085.76	362.96	3807.44	996.38	3776.85	2500.19	12348.5	7548.45	3039.92	10546.5
80877.7	63701.6	148.5	3422.43	1313.52	3818.88	1954.16	816.4	2151.76	589.82	19227.7	9594.97	6640.74	3111.81	1701.66	8183.61
46924.9	74633.1	510.84	3287.79	699.92	1816.88	1555.84	638.56	1046.24	3551.24	3679.83	2127.51	2898.51	3431.76	1939.45	6054.56
112228	89541.5	167.31	3762.99	257.92	336.96	1959.36	6102.72	2860	2163.7	1338.26	3689.84	8474.33	13100.6	7295.65	5614.53
121768	194164	959.31	5708.34	430.56	632.32	945.36	483.6	3803.28	1276.66	4085.62	2833.6	14221.6	7732.52	3259.54	11067.1
246494	145437	838.53	4922.28	560.56	612.56	1459.12	626.08	3859.44	1027.95	3198.58	3484.25	15217.8	8346.35	3174.22	10403.5
202108	161394	759.33	4816.35	1205.36	656.24	1258.4	679.12	3713.84	987.14	2880.57	2818.97	13405.5	6892.75	2603.84	10071.7
131755	159553	996.93	7108.2	702	698.88	1605.76	758.16	4399.2	1506.89	3972.43	3101.56	16441.5	12425.9	4885.36	13112.4
92796	174261	948.42	5859.81	455.52	622.96	1251.12	465.92	4098.64	1221.22	4361.28	2808.19	15544	8921.47	3776.2	11069.5
203208	129593	774.18	4740.12	357.76	542.88	1378	1420.64	3679.52	1658.58	3742.97	3257.87	14504.4	6880.9	3189.23	10212.3
236165	140226	1068.21	6784.47	653.12	841.36	1474.72	668.72	4349.28	1565.41	4784.78	3990.14	16880.7	9073.94	3730.38	13303.6
5853.87	30694	150.48	717.75	107.12	241.28	177.84	494	-43.68	32.34	338.8	461.23	1036.48	574.33	357.87	1266.37
202252	105949	799.92	5544.99	949.52	626.08	1239.68	528.32	2957.76	891.66	3679.06	3036.88	12849.4	10385.3	4451.65	10150.7
38629.7	18091.3	67.32	158.4	94.64	-1.04	120.64	112.32	449.28	170.94	-55.44	204.82	921.93	313.63	190.39	560.9
50212.7	158324	596.97	4105.53	586.56	749.84	1075.36	540.8	2779.92	1280.51	3126.97	2349.27	9458.67	5857.85	2637.02	8339.24
152457	144159	887.04	5695.47	1781.52	900.64	1301.04	579.28	3313.44	2116.73	4113.34	3192.42	15489.5	9776.25	4100.1	11767.8
94736.8	163980	666.27	4182.75	621.92	600.08	977.6	487.76	2754.96	957.11	3314.85	2274.58	12626.6	6585.44	2661.51	8893.03
41726.3	201642	1188.99	6169.68	914.16	1130.48	1573.52	736.32	4503.2	1854.16	5148.22	3746.05	16598.7	8407.18	3388.31	12470.2
95516	142107	894.96	5411.34	912.08	608.4	1587.04	600.08	3284.32	1195.81	2986.83	2857.47	16439.1	9021.8	3518.66	10902.8
41591.9	17686.3	-24.75	448.47	136.24	131.04	37.44	-53.04	264.16	138.6	257.18	161.7	1034.11	498.49	265.44	417.91
183488	142706	688.05	4910.4	669.76	456.56	1086.8	673.92	3234.4	979.44	3207.05	2601.83	12174.7	6763.98	2800.55	9525.03
31177.7	129632	790.02	5764.77	1571.44	601.12	1786.72	1040	3777.28	2140.6	3723.72	3794.56	13936.4	12305	5256.66	12963.1
21030	125474	503.91	3130.38	386.88	524.16	958.88	478.4	1857.44	806.19	2736.58	1633.17	10687.9	4903.53	2084.81	6338.17
19096.6	38836.7	63.36	529.65	393.12	1253.2	788.32	174.72	762.32	86.24	77	237.93	2572.24	1149.45	452.67	1132.86
87349.6	171335	628.65	3332.34	409.76	423.28	1108.64	600.08	2819.44	555.94	3050.74	2102.87	9344.12	5864.17	2299.69	7432.32
30538.6	206480	1033.56	6259.77	652.08	664.56	1230.32	528.32	4541.68	1443.75	4031.72	3341.03	16621.6	8335.29	3234.26	13451.3
37778.4	42267.1	86.13	424.71	246.48	189.28	254.8	-26	723.84	24.64	110.11	482.02	2472.7	979.6	361.03	1324.04
129617	121801	707.85	4855.95	1004.64	587.6	1166.88	723.84	3826.16	1338.26	3142.37	2702.7	14535.2	7751.48	3551.05	9432.6
149671	146684	659.34	4735.17	588.64	430.56	986.96	329.68	3442.4	1155	2816.66	2491.72	12213.4	7247.46	2847.95	8468.01
144805	152447	876.15	4714.38	645.84	638.56	1083.68	682.24	2783.04	948.64	3833.06	2982.21	12190.5	6970.96	2874.02	10366.4
137012	115887	698.94	4435.2	1664	529.36	1165.84	609.44	3311.36	957.11	3236.31	2969.12	14441.2	8313.96	3092.85	9823.65
121170	169292	939.51	6029.1	548.08	652.08	1543.36	982.8	4651.92	1643.18	4159.54	3561.25	16309.6	10768.5	4393.19	13626.7
138223	157336	712.8	6147.9	491.92	710.32	1801.28	534.56	3693.04	934.78	2641.1	2119.81	15304.7	12918.1	5481.81	11705.4
99592.7	69604.9	144.54	2721.51	71.76	113.36	1579.76	2120.56	346.32	907.83	476.63	372.68	3370.93	9058.14	5003.07	4442.17
167700	159556	937.53	6677.55	911.04	769.6	1717.04	673.92	4681.04	1523.06	4170.32	3673.67	18199.2	10183.1	4581.21	13877.1
232646	164114	724.68	5067.81	1251.12	664.56	1237.6	200.72	3869.84	1426.81	3140.06	2735.04	13424.5	7148.71	2925.37	9747.81
138471	133986	599.94	4888.62	412.88	452.4	1110.72	610.48	2837.12	649.11	3484.25	2641.87	11135.8	9151.36	3715.37	8576.24
31678.3	165027	848.43	5293.53	384.8	612.56	1322.88	682.24	2851.68	1126.51	3804.57	2427.04	11132.7	8909.62	4140.39	9513.18
119673	154582	877.14	4626.27	610.48	614.64	1342.64	688.48	4478.24	1041.04	4689.3	3445.75	14216.8	7722.25	3239	10568.6
119687	143030	206.91	2246.31	1444.56	644.8	1088.88	572	2631.2	347.27	1959.65	1821.82	8123.57	6368.19	2705.75	4390.82
147622	209635	976.14	6584.49	503.36	894.4	2162.16	976.56	4309.76	1349.04	3941.63	3694.46	17279.7	15465.8	6353.97	14462.5
104665	150544	693.99	3775.86	416	517.92	1033.76	414.96	2886	818.51	2726.57	2430.89	13177.2	6553.84	2771.32	8851.16
34929.6	41350.3	245.52	1283.04	167.44	220.48	411.84	110.24	785.2	391.16	1181.95	592.9	2965.66	1191.32	658.86	3196.34
39616.3	101044	492.03	2582.91	411.84	458.64	784.16	169.52	1453.92	1141.91	3427.27	2170.63	6615.46	3101.54	1579.21	5187.93
67083.4	125227	671.22	4451.04	435.76	541.84	1108.64	384.8	3883.36	954.8	3398.01	2651.11	12639.2	7449.7	3107.07	9884.48
152060	116095	676.17	3897.63	329.68	442	856.96	412.88	2826.72	956.34	3311	2326.17	11364.2	5251.13	2316.28	8347.14
146047	162089	1112.76	7374.51	1120.08	971.36	1745.12	914.16	5445.44	1604.68	4466.77	3586.66	18051.5	10588.4	4396.35	15044.8
158226	169491	1014.75	6740.91	1171.04	615.68	1549.6	814.32	5349.76	1445.29	4887.96	4525.29	18286.1	9911.34	4104.05	14320.3
21305.4	205802	803.88	5044.05	599.04	750.88	1465.36	712.4	3200.08	826.21	3005.31	2268.42	11703.1	8654.45	3764.35	10104.1
72008.2	91591.8	551.43	3705.57	195.52	450.32	1053.52	470.08	2393.04	662.2	2135.98	2204.51	10422.5	8208.89	3321.95	7638.51
160510	133536	759.33	5065.83	903.76	708.24	1203.28	645.84	4149.6	1277.43	3829.21	3228.61	14160	8208.89	3334.59	10657.9
47837.8	152295	706.86	3892.68	491.92	692.64	1201.2	463.84	2981.68	949.41	3515.82	2468.62	10769.3	6071.15	2594.36	8453.79
119477	159746	835.56	5152.95	845.52	1153.36	1292.72	555.36	3758.56	1150.38	3441.9	2875.95	13167.7	6677.08	2913.52	11237
141545	132851	525.69	3633.3	573.04	410.8	889.2	281.84	3271.84	813.12	3200.89	2227.61	11266.2	5266.93	2288.63	7293.28
128627	138793	751.41	4564.89	320.32	374.4	1356.16	1241.76	3423.68	1047.2	2773.54	2761.99	13837.6	7406.25	3171.85	9337.01
173765	173865	835.56	5930.1	1102.4	593.84	1570.4	829.92	3390.4	1518.44	4179.56	3068.45	13967.2	9328.32	3851.25	11763.1
181503	133898	577.17	4572.81	431.6	438.88	1106.56	256.88	4333.68	830.06	2119.81	2484.79	13971.9	7851.02	3247.69	9598.5
113559	65116.3	114.84	4153.05	134.16	245.44	2439.84	4422.08	1783.6	1637.02	953.26	3866.94	6111.44	13556.4	6944.1	5211.63
61666.1	167706	756.36	4779.72	438.88	605.28	1352	640.64	2593.76	889.35	3017.63	2919.07	13042.9	9301.46	3958.69	9458.67
59107.3	142922	701.91	4077.81	395.2	538.72	854.88	369.2	3484	977.13	3180.87	2341.57	11442.4	6473.26	2750.78	8459.32
101679	128875	746.46	3950.1	536.64	566.8	1128.4	485.68	3934.32	972.51	3365.67	2485.56	13250.7	7243.51	2729.45	8905.67
173074	157212	804.87	4798.53	560.56	643.76	1052.48	565.76	3026.4	1545.39	3304.84	2427.81	12136.8	7244.3	2808.45	10912.3
130692	164329	683.1	4144.14	408.72	579.28	1003.6	304.72	3303.04	1319.01	2919.84	2366.98	12220.5	6154.1	2558.81	8264.19
161575	171447	664.29	4199.58	1798.16	761.28	1303.12	618.8	3349.84	850.08	2959.88	2986.06	11028.4	8182.03	3239.79	8481.44
49408.4	131990	262.35	3291.75	1501.76	496.08	1399.84	559.52	2463.76	331.87	846.23	1495.34	10550.5	11620.1	4779.5	6042.71
91556.7	164268	850.41	5156.91	1551.68	856.96	1386.32	1162.72	3074.24	1669.36	3563.56	4107.95	11442.4	9715.42	4420.84	10769.3
24784.4	13474.9	51.48	-63.36	153.92	59.28	71.76	23.92	12.48	33.11	286.44	140.14	571.17	179.33	28.44	161.95
116231	143832	695.97	5244.03	655.2	513.76	1907.36	1605.76	3886.48	4228.84	3756.06	3294.06	19052.4	9921.61	4506.95	10882.2
162680	143477	853.38	7660.62	542.88	770.64	1706.64	652.08	4313.92	1402.17	3840.76	3330.25	21172	15860	6676.29	15756.6
100398	151277	787.05	5516.28	451.36	517.92	1286.48	797.68	3667.04	1345.96	3228.61	2845.92	13811.6	8664.72	3445.19	10910.7
112789	117557	580.14	4278.78	333.84	425.36	833.04	295.36	3073.2	922.46	2691.92	1884.19	11493.7	6438.5	2541.43	8107.77
76546.6	116967	715.77	4553.01	1640.08	2776.8	16473.6	24065.6	3548.48	8620.15	8108.1	4324.32	4382.13	10065.4	12827.2	7645.62
77112	158207	857.34	4190.67	375.44	673.92	941.2	334.88	1721.2	1379.07	4064.06	1590.82	3833.08	3239.79	1687.44	9116.6
86356.5	132252	564.3	3209.58	314.08	582.4	767.52	437.84	2613.52	749.21	2302.3	1666.28	8908.83	4549.61	1887.31	6737.12
56854.7	76158.7	108.9	1232.55	2399.28	368.16	604.24	290.16	2403.44	418.88	219.45	2038.96	3081	3287.19	1532.6	1458.34
187300	153450	1025.64	5795.46	480.48	802.88	1430	703.04	3484	1020.25	4137.98	2947.56	17258.3	8988.62	3692.46	11717.3
30716.8	26338	55.44	89.1	82.16	4.16	138.32	-11.44	321.36	-16.94	66.22	66.22	791.58	353.92	154.05	500.07
Single Cells
Patient 12: Sarcoidosis
158352	112564	216.81	3529.35	1726.4	601.12	1785.68	810.16	1204.32	297.99	429.66	1013.32	5583.72	13712	6042.71	5427.3
209426	152526	700.92	3038.31	486.72	605.28	872.56	362.96	2208.96	833.14	3892.35	2739.66	7083.93	4181.47	1891.26	6469.31
33476.5	55145	130.68	1907.73	1513.2	6244.16	2836.08	560.56	1227.2	223.3	7172.55	3784.55	3421.49	1704.82	861.1	4227.29
104478	160540	150.48	1178.1	2185.04	674.96	631.28	226.72	1774.24	288.75	599.06	599.06	4633.35	3506.02	1350.9	2571.45
52164	127308	477.18	2378.97	264.16	432.64	786.24	422.24	1082.64	777.7	3808.42	2142.91	4624.66	3535.25	1519.17	4562.25
17517.9	14861.9	57.42	108.9	298.48	53.04	151.84	-70.24	-94.32	103.95	-157.38	-145.7	191.97	56.09	-56.33	-153.16
14840.8	139064	474.21	2897.73	336.96	526.24	967.2	473.2	1389.44	706.09	3277.12	2242.24	7013.62	5131.05	2345.51	5609
55729.6	242850	1127.61	4711.41	624	1044.16	1244.88	683.28	3080.48	1047.97	6388.69	3944.71	10138.9	5878.39	2637.81	9645.11
16162.7	26384.5	59.4	497.97	167.44	73.84	32.24	68.64	130	227.92	1624.7	711.48	658.07	654.12	356.29	863.47
77784.3	183064	824.67	3834.27	532.48	763.36	1360.32	485.68	1800.24	973.28	4532.22	2928.31	10363.2	7172.41	3107.86	8028.77
71800	156636	607.86	3680.82	1701.44	5810.48	3732.56	2727.92	1790.88	1476.09	4680.06	2320.01	10724.2	5417.82	4030.58	6408.48
88549.2	161866	507.87	2758.14	383.76	480.48	761.28	388.96	2091.44	553.63	2668.05	1729.42	7276.69	4805.57	2057.16	6143.83
6892.29	23087.8	17.82	-117.2	26	31.2	2.08	-174.24	-31.76	123.97	-58.71	38.5	88.48	33.18	30.81	-58.75
18378.9	231829	845.46	3915.45	492.96	760.24	1295.84	661.44	2958.8	944.79	5652.57	3173.17	9376.51	6030.07	2509.04	8329.76
4521.42	4770.81	14.85	85.14	-86.64	101.92	-47.12	-55.84	75.92	-26.28	289.52	151.69	289.14	150.89	199.08	305.73
127287	137336	216.81	1037.52	1926.08	903.76	930.8	318.24	3005.6	264.11	487.41	1422.19	5035.46	2264.93	879.27	1749.85
206245	249665	810.81	9490.14	2037.36	5314.4	6922.24	10240.9	4210.96	7482.09	11175.8	5560.17	12656.6	8351.88	17063.2	16111.3
121676	193957	548.46	3828.33	505.44	515.84	1524.64	428.48	1936.48	666.05	3223.22	1985.06	6917.24	8361.36	3699.57	6380.83
102523	200200	782.1	3244.23	448.24	603.2	1149.2	677.04	1961.44	656.04	5236	2721.95	7841.54	5221.11	2238.07	6707.89
110865	208059	928.62	4912.38	580.32	766.48	1698.32	593.84	2958.8	989.45	7356.58	3986.29	9322	9438.13	3875.74	9190.86
50339.1	187640	595.98	4734.18	421.2	656.24	2077.92	940.16	1955.2	769.23	3812.27	2724.26	8155.96	14047	6212.56	8496.45
23968.7	19555.5	17.82	174.24	223.6	62.4	240.24	-69.28	59.28	-119.11	65.45	57.75	739.44	298.62	71.1	188.81
206112	213079	733.59	4670.82	496.08	641.68	1389.44	850.72	2210	1101.1	5927.46	3354.89	9807.06	8136.21	3320.37	8643.39
71679.3	187941	655.38	3510.54	463.84	656.24	1086.8	1026.48	1525.68	837.76	5064.29	2594.13	3443.61	4235.98	2133.79	6594.13
144093	151483	370.26	1882.98	634.4	811.2	1122.16	507.52	572	870.87	1898.05	734.58	2127.47	4470.61	2127.47	2837.68
87804.8	169234	181.17	4613.4	1149.2	601.12	1821.04	884	1447.68	539	548.24	542.08	7329.62	16341.1	6782.94	6566.48
39993.8	37218.1	161.37	1621.62	508.56	1643.2	1103.44	344.24	1017.12	530.53	2115.19	1620.08	2609.37	2676.52	1274.27	3129.98
56918.7	230747	569.25	2668.05	498.16	637.52	1427.92	714.48	2071.68	583.66	3550.47	2598.75	4789.77	4101.68	2037.41	5514.2
5360.58	35565.8	-52.54	0.99	-48.08	-10.56	-9.6	-54.88	119.6	60.83	3.85	66.22	-180.3	-92.78	16.59	-0.42
47461.1	56070.6	107.91	985.05	1545.44	3235.44	1702.48	522.08	1199.12	284.9	1657.81	1557.71	3175.8	1317.72	726.01	2189.88
80059.6	140196	455.4	2910.6	406.64	479.44	960.96	216.32	856.96	497.42	3567.41	1559.25	2594.36	4278.64	1848.6	5570.29
160689	192260	583.11	4228.29	1246.96	2409.68	2345.2	965.12	1900.08	1778.7	5156.69	3515.05	7188.21	7622.71	4083.51	7839.96
66219.1	210639	1173.15	4690.62	660.4	846.56	1517.36	833.04	2853.76	1155.77	7653.8	4198.04	10178.4	6642.32	3141.83	9695.67
13876.9	70000.9	175.23	1367.19	203.84	453.44	552.24	289.12	1236.56	367.29	1800.26	938.63	3029.65	2074.54	1190.53	2257.03
65175.8	84931.1	167.31	3299.67	4155.84	944.32	1716	8536.32	3309.28	3411.87	863.94	7033.18	4431.11	13005.8	9008.37	4355.27
145702	200740	909.81	4724.28	708.24	827.84	1311.44	548.08	3660.8	1115.73	5321.47	3922.38	11895.8	8001.91	3383.57	9826.02
101979	56459.7	91.08	783.09	130	197.6	260	96.72	1008.8	100.1	33.11	604.45	2225.43	2639.39	981.18	1134.44
98102.3	170528	160.38	2105.73	1450.8	573.04	1154.4	565.76	2459.6	331.1	529.76	1114.96	6726.06	7846.28	3168.69	3779.36
14697.5	21262.2	112.86	137.61	-22.08	160.16	-14.4	80.08	358.8	130.9	-82.07	5.39	854.78	383.94	154.05	127.19
140062	165865	785.07	3489.75	406.64	624	1136.72	516.88	1995.76	914.76	4432.89	2755.83	7430.74	6204.66	2687.58	6596.5
127569	133321	428.67	2428.47	327.6	447.2	670.8	394.16	1928.16	214.83	2365.44	1532.3	5788.33	4803.99	1883.36	4744.74
43606.3	186702	593.01	2977.92	424.32	668.72	1166.88	446.16	2187.12	656.04	4805.57	2332.33	6698.41	4509.32	2129.05	6045.87
76272	80938.4	98.01	755.37	2972.32	763.36	486.72	2387.84	1837.68	1260.49	503.58	3220.14	2749.2	1312.19	1689.02	1306.66
9956.52	12883.9	-36.38	-10.12	9.36	40.56	-16.32	38.48	20.8	-35.04	-54.56	118.58	-187.98	-80.63	-15.41	199.87
29262.1	214041	946.44	4485.69	589.68	862.16	1526.72	663.52	3179.28	1248.94	6021.4	3629.01	10750.3	7455.23	3047.82	10100.9
107451	209560	710.82	5110.38	470.08	706.16	1869.92	640.64	2788.24	801.57	5333.79	2794.33	8705.01	12601.3	5342.77	9142.67
57468.7	221267	818.73	4015.44	468	817.44	1374.88	954.72	3154.32	1021.79	5641.02	3253.25	9401	6727.64	2839.26	8268.14
78821.9	204670	824.67	4838.13	488.8	789.36	1987.44	1589.12	2065.44	840.84	6417.95	3386.46	8663.14	11658	5075.75	8845.63
125953	186403	581.13	2886.84	508.56	575.12	915.2	392.08	1324.96	679.91	3836.14	2957.57	6426.65	5164.23	2235.7	5080.49
113639	194497	812.79	3684.78	550.16	792.48	1279.2	682.24	2746.64	733.81	5185.95	3462.69	8317.12	6406.11	2997.26	7350.95
110531	140605	232.65	2704.68	1544.4	732.16	1203.28	445.12	2047.76	319.55	553.63	1529.99	8148.06	7871.56	3056.51	4645.2
42836.8	158864	525.69	3383.82	515.84	847.6	1099.28	450.32	1653.6	763.07	2746.59	2059.75	7918.96	6704.73	2696.27	7134.49
38914.8	20457.4	-13.15	98.01	127.92	105.04	38.48	105.04	-7.68	-1.69	143.99	11.55	415.54	87.69	129.56	226.73
34502.8	50245.5	166.32	958.32	3599.44	793.52	704.08	7559.76	3060.72	3714.48	794.64	7307.3	2973.56	2556.44	4451.65	1857.29
181621	145594	194.04	2261.16	567.84	715.52	898.56	408.72	1291.68	55.44	203.28	639.1	5273.25	6654.17	2583.3	3055.72
46475.4	165166	601.92	2991.78	367.12	593.84	914.16	386.88	3200.08	509.74	3568.18	2594.13	7246.67	4243.09	2188.3	6816.12
9232.38	36279.5	-24.26	-57.59	182	71.76	-37.52	-150.16	-62.56	113.96	-104.51	-6.3	80.58	34.76	-115.87	-60.38
62671.3	74206.4	209.88	917.73	3949.92	903.76	586.56	3227.12	2333.76	1386.77	547.47	6150.76	1783.03	812.12	1745.9	1309.82
84006.7	160309	706.86	3131.37	380.64	556.4	807.04	552.24	2201.68	629.86	4620	2926.77	7389.66	5533.16	2478.23	6583.07
116898	90031.6	100.98	1104.84	132.08	132.08	267.28	653.12	809.12	339.57	304.15	642.18	2040.57	914.03	1354.06	1471.77
72432.6	52809.6	159.39	3107.61	4427.28	973.44	1142.96	3671.2	1366.56	2056.67	565.95	2876.72	4209.12	11028.4	6635.21	3856.78
85812.2	212231	889.02	4441.14	531.44	639.6	1236.56	1031.68	4113.2	1134.21	6111.49	3645.95	10875.9	6014.27	2641.76	10148.3
27866.4	36229.1	148.5	283.14	634.4	3128.32	1557.92	416	622.96	13.86	21.56	414.26	1737.21	907.71	420.28	752.87
144213	190813	253.44	1224.63	2732.08	898.56	820.56	470.08	3135.6	312.62	605.99	1315.93	4666.53	2926.16	1203.17	2366.05
41029.7	184896	757.35	4418.37	517.92	714.48	1518.4	612.56	2438.8	1051.82	4489.1	3012.24	8949.12	8950.7	4002.93	8273.67
138086	89422.7	146.52	712.8	3612.96	672.88	815.36	6600.88	2817.36	2979.9	420.42	5297.6	2055.58	1147.87	3676.66	1189.74
36882.5	214745	765.27	3837.24	3382.08	1725.36	1685.84	1014	3312.4	1054.13	4711.63	2780.47	4816.63	4530.65	2520.1	6854.04
115743	174889	680.13	5219.28	392.08	609.44	1596.4	723.84	1914.64	491.26	3934.7	2480.17	8483.02	12697.7	5260.61	9085.79
76168.4	100100	150.48	1741.41	121.68	287.04	569.92	210.08	1171.04	727.65	284.13	389.62	2404.76	3510.76	3102.33	2877.18
18698	65984.5	78.21	539.55	38.48	205.92	298.48	149.76	715.52	-47.49	78.54	381.92	2990.15	1452.81	447.14	910.87
174476	192031	711.81	3596.67	411.84	601.12	1199.12	204.88	1371.76	426.58	5053.51	1705.55	3828.34	7390.45	3581.86	7238.77
159601	178770	826.65	3547.17	472.16	617.76	1985.36	1573.52	3040.96	1272.81	5169.78	3068.45	8508.3	5176.87	2786.33	7110.79
23449.5	11376.1	60.39	83.16	93.6	164.32	124.8	-53.92	332.8	163.24	1184.26	530.53	342.07	242.53	56.88	546.68
13970.1	204456	836.55	4575.78	453.44	641.68	1353.04	488.8	2904.72	803.11	4591.51	3006.85	10067.8	7836.8	3355.13	8462.48
102605	161398	256.41	1897.83	1969.76	576.16	948.48	428.48	1582.88	124.74	2244.55	1512.28	6981.23	6230.73	2567.5	3628.47
95347.5	165394	223.74	1754.28	2328.56	900.64	942.24	730.08	2850.64	397.32	396.55	917.84	6144.62	5575.03	2161.44	3427.02
12795.6	4210.47	-41.43	-12.14	-65.44	63.44	-2.88	33.28	308.88	148.61	-57.48	-112.81	295.46	153.26	11.06	167.48
193777	210350	902.88	5337.09	475.28	710.32	1587.04	659.36	2736.24	768.46	6179.25	3757.6	10981	10538.6	4685.49	10903.6
3438.45	130507	451.44	2250.27	431.6	785.2	1052.48	654.16	810.16	806.96	3070.76	1365.98	5216.37	3241.37	1534.18	4529.86
106040	68907	102.96	326.7	144.56	241.28	516.88	3290.56	1146.08	1209.67	419.65	371.91	1347.74	993.82	1510.48	818.44
84656.3	181480	880.11	4044.15	1270.88	3319.68	2621.84	1064.96	1981.2	1139.6	9044.42	4440.59	8509.09	4837.96	2875.6	8139.37
58048.7	119179	673.2	3212.55	810.16	1938.56	1545.44	625.04	1487.2	1098.79	5359.2	3511.97	6821.65	4366.33	2396.07	5911.57
133901	179458	756.36	3176.91	417.04	692.64	1077.44	679.12	2750.8	1066.45	5122.04	3702.93	7213.49	5520.52	2607.79	7201.64
70333.1	220747	792	3469.95	366.08	773.76	1058.72	618.8	2493.92	709.17	4846.38	2875.95	7488.41	6047.45	2479.02	6325.53
53090.6	162767	274.23	1637.46	756.08	800.8	742.56	410.8	2325.44	567.49	599.06	1128.82	6651.8	3895.49	1512.85	2685.21
95691	214889	810.81	4083.75	573.04	867.36	1368.64	918.32	2660.32	953.26	5070.45	3495.03	10170.5	6767.93	2610.16	8170.18
24622.4	135791	195.03	1376.1	1263.6	497.12	733.2	409.76	1983.28	207.13	327.25	942.48	5548.96	4345.79	1725.36	2511.41
151651	216326	798.93	6206.31	504.4	740.48	2145.52	1145.04	2453.36	1125.74	5802.72	3146.99	10733.7	18655.8	8195.46	11355.5
20203.8	157263	717.75	3752.1	498.16	464.88	1269.84	586.56	2295.28	701.47	3966.27	2745.82	7821	7825.74	3284.82	7370.7
44064	178703	646.47	4271.85	566.8	702	1672.32	582.4	2024.88	806.96	4295.83	2283.82	7760.17	9166.37	4065.34	8058
36061.2	178456	753.39	4363.92	590.72	784.16	1414.4	546	2818.4	839.3	5453.91	2761.22	9113.44	6408.48	2928.53	8437.99
127901	75126.1	166.32	794.97	137.28	278.72	652.08	5828.16	1785.68	2320.01	553.63	689.92	1917.33	2037.41	3058.09	1267.16
102132	107414	617.76	2710.62	333.84	850.72	1005.68	508.56	1334.32	721.49	5169.01	3513.51	5827.83	3325.11	1881.78	4786.61
96473.4	203765	1131.57	5348.97	710.32	781.04	1478.88	785.2	4010.24	1251.25	6298.6	4467.54	15370.2	8315.54	3327.48	11466.1
140516	165678	835.56	3629.34	466.96	688.48	997.36	414.96	3346.72	938.63	6379.45	3987.83	9031.28	4435.85	1922.07	7632.98
8761.77	18586.3	-45.47	-3.05	-5.76	-1.92	-26.96	99.84	113.36	-20.44	82.39	-5.84	254.38	25.28	-89.94	-25.93
117510	89093.1	182.16	4001.58	3569.28	792.48	1571.44	3626.48	1762.8	1921.92	690.69	7171.01	4047.17	13931.6	7125.01	5183.98
117714	157856	613.8	3224.43	281.84	333.84	999.44	637.52	1916.72	870.1	3244.01	2220.68	7078.4	4957.25	2279.94	6519.08
34898	162142	175.23	4144.14	1181.44	522.08	1809.6	732.16	683.28	664.51	413.49	439.67	4448.49	14810.9	6646.27	6158.84
80750.5	32695.7	74.25	427.68	313.04	1315.6	795.6	236.08	997.36	11.55	204.05	644.49	1437.8	588.55	190.39	504.02
Single Cells
Patient 13: Sarcoidosis
122522	165142	881.1	5352.93	497.12	839.28	1856.4	1035.84	3464.24	1188.88	4266.57	2955.26	12046.7	12559.4	5231.38	10181.5
131705	142706	670.23	3869.91	422.24	743.6	1387.36	732.16	2042.56	844.69	2427.04	1560.02	9724.9	7622.71	3392.26	7926.86
209653	184580	967.23	5018.31	661.44	1096.16	1600.56	889.2	2665.52	1067.99	3799.95	2514.05	12423.5	9047.87	4037.69	9853.67
64753	145659	565.29	3625.38	506.48	761.28	1216.8	533.52	2818.4	843.92	2643.41	1945.79	8938.06	7802.83	3365.4	6540.41
237972	120877	585.09	5531.13	322.4	780	1847.04	773.76	2548	928.62	2908.29	2276.89	9930.3	15612	6844.56	9424.7
112776	119601	533.61	2922.48	427.44	643.76	1145.04	681.2	1716	902.44	3597.44	2144.45	7054.7	6137.51	2505.88	6695.25
173949	203706	986.04	5822.19	725.92	1027.52	1849.12	994.24	2601.04	1479.94	4904.9	2539.46	10664.2	11188.8	4879.04	11166.7
122085	163142	532.62	4653	532.48	715.52	1924	650	2082.08	646.8	2641.87	2119.04	8155.96	11292.3	4946.98	7941.08
27190.1	15663.8	61.38	93.06	91.52	169.52	169.52	30.16	-90.48	-63.91	0.77	6.16	1096.52	277.29	174.59	285.98
3384.18	142052	524.7	3766.95	567.84	726.96	1333.28	819.52	2419.04	612.92	3095.4	2012.01	7798.09	9037.6	3936.57	7414.94
36583.6	126986	564.3	3768.93	426.4	799.76	1249.04	497.12	2025.92	922.46	2545.62	2004.31	7404.67	9536.09	4149.08	7437.85
81257.6	120587	519.75	4631.22	328.64	617.76	1468.48	604.24	1701.44	733.04	3100.02	2025.87	7794.14	10280.3	4405.04	8091.18
11837.3	15518.2	38.61	211.86	134.16	178.88	171.6	194.48	135.2	36.96	465.08	329.56	1250.57	551.42	436.87	668.34
88959.9	183111	900.9	6968.61	539.76	949.52	2508.48	1088.88	2997.28	879.34	4346.65	2526.37	12752.2	19245.2	8772.16	11750.5
75969.9	147460	740.52	5400.45	492.96	683.28	1666.08	785.2	2672.8	733.04	2925.23	1851.08	11483.4	14565.2	6514.34	9990.34
23961.4	13795.7	37.62	226.71	196.56	189.28	161.2	78	210.08	26.95	388.85	186.34	1004.09	472.42	15.01	435.29
91639.4	128926	707.85	6305.31	554.32	747.76	1987.44	1010.88	2411.76	719.95	2964.5	2276.89	10856.2	17967.8	7505.79	10888.6
175655	141763	821.7	5375.7	591.76	933.92	2063.36	515.84	2441.92	1195.81	3715.25	2636.48	14713.8	12735.6	5474.7	10157.8
42594.7	94050	414.81	2419.56	919.36	2786.16	1893.84	939.12	1190.8	740.74	2219.14	1540.77	5371.21	3031.23	1705.61	4188.58
170159	135861	574.2	4688.64	509.6	1131.52	1720.16	711.36	2264.08	783.86	2749.67	1942.71	9173.48	12613.1	5264.56	8400.07
15552.8	35715.2	-49.5	174.24	-41.6	33.28	31.2	73.84	26	124.74	-50.05	-89.32	142.99	-75.05	-15.01	-36.34
37652	67345.7	129.69	1468.17	114.4	426.4	979.68	2430.48	3047.2	1948.1	763.07	7015.47	6052.98	3992.66	2909.57	2656.77
57595.1	57409.1	181.17	792	218.4	529.36	1411.28	666.64	2293.2	1298.22	477.4	7197.96	4858.5	2481.39	1227.66	1919.7
71849.4	170771	741.51	5135.13	512.72	1047.28	1814.8	722.8	2072.72	1161.93	3920.07	2443.98	9232.73	8882.76	3924.72	9188.49
22917.3	9408.96	50.49	18.81	15.6	6.24	-24.96	-125.84	-58.24	148.61	200.2	-127.82	338.12	245.69	129.56	188.81
109503	167671	772.2	4864.86	501.28	861.12	1573.52	715.52	2506.4	763.07	3494.26	2299.99	9386.78	10182.3	4298.39	8663.14
132450	135114	304.92	3836.25	1790.88	1046.24	1522.56	610.48	2517.84	324.94	672.98	1050.28	8853.53	11758.4	5198.2	5754.36
178019	139196	767.25	7603.2	451.36	848.64	2319.2	988	3114.8	843.15	3890.04	2562.56	11488.2	19387.4	8520.15	12553.1
73791.8	116940	612.81	3426.39	418.08	917.28	1262.56	609.44	2621.84	732.27	2357.74	1513.82	7922.91	6730.01	2927.74	6966.22
39995.4	142957	599.94	4540.14	448.24	646.88	1594.32	602.16	2390.96	793.1	2630.32	2032.03	9592.18	10751.1	4455.6	8308.43
62078.4	156175	716.76	5388.57	529.36	686.4	1664	499.2	2585.44	1089.55	3176.25	2698.85	10547.3	11627.2	4922.49	9625.36
6299.37	4202.55	13.86	3.96	-9.36	4.16	59.28	-117.52	-152.88	52.36	-66.99	-33.11	176.96	42.66	-12.64	197.5
104916	160719	771.21	5698.44	601.12	903.76	1856.4	612.56	3054.48	1071.07	3099.25	2229.15	10882.2	12997.1	5730.66	10517.3
122116	165905	875.16	8387.28	445.12	760.24	2418	965.12	3496.48	1225.84	4411.33	3235.54	14995	22907.6	10129.4	14833
147685	203713	770.22	7204.23	1820	5425.68	3857.36	1603.68	6852.56	1807.19	41443.7	19745.1	9388.36	12468.6	6098.01	15698.9
88887	94712.3	363.33	4468.86	290.16	657.28	1582.88	618.8	1690	354.2	1662.43	1093.4	6718.95	13078.5	5914.73	7284.59
91331.5	137547	852.39	4922.28	539.76	905.84	1737.84	816.4	954.72	1111.88	3296.37	1491.49	4762.91	9457.09	4128.54	9306.2
154456	159608	807.84	5775.66	498.16	741.52	1870.96	801.84	2998.32	1185.03	3918.53	2337.72	11129.5	12382.5	5267.72	9826.02
113609	125270	235.62	1587.96	1623.44	1006.72	978.64	269.36	3267.68	435.82	512.82	1733.27	6654.96	3400.95	1365.12	2862.17
67882.9	167054	837.54	7314.12	541.84	972.4	2830.88	955.76	3193.84	1285.9	4198.04	2927.54	11599.6	22033.1	9537.67	12610.8
127025	112652	607.86	4145.13	281.84	542.88	1438.32	786.24	2843.36	857.01	2908.29	2426.27	7704.87	9274.6	4349.74	8449.84
111959	176185	693.99	3532.32	464.88	735.28	1333.28	547.04	2221.44	645.26	2903.67	1796.41	8747.67	7157.4	3462.57	7221.39
8340.57	4624.29	-0.99	63.36	-5.2	167.44	63.44	4.16	281.84	150.15	137.83	-78.54	220.41	-57.67	75.84	221.99
158017	140836	721.71	4901.49	466.96	846.56	1384.24	732.16	3402.88	1365.21	3258.64	2166.01	10553.6	10520.4	4302.34	9401
13063.7	5247.99	23.76	192.06	12.48	125.84	20.8	-9.36	-6.24	145.53	173.25	141.68	583.02	440.82	127.19	408.43
22738.3	7476.48	-26.73	-47.52	78	69.68	-4.16	-137.28	-39.52	-0.77	-116.27	63.91	404.48	223.57	-65.57	132.72
117921	163581	838.53	3830.31	707.2	970.32	1423.76	820.56	2533.44	1071.84	3331.79	2350.04	9961.11	5738.56	2640.97	7408.62
147806	146433	561.33	3777.84	412.88	612.56	1346.8	570.96	2572.96	1068.76	3020.71	2674.98	8151.22	8693.16	3752.5	7769.65
137704	141246	523.71	5861.79	463.84	665.6	1978.08	799.76	2268.24	946.33	3554.32	2745.82	11241.7	17347.6	7501.84	10794.6
91105.6	128704	357.39	3551.13	382.72	801.84	1746.16	860.08	2696.72	501.27	2019.71	1671.67	8884.34	11080.5	4854.55	7244.3
17550.3	12228.5	54.45	224.73	-72.8	145.6	64.48	186.16	187.2	173.25	233.31	170.94	827.92	339.7	96.38	448.72
171178	150874	791.01	6317.19	518.96	750.88	2312.96	996.32	3107.52	896.28	3697.54	2423.19	11708.6	18136.8	7862.08	12374.6
172681	139606	732.6	4095.63	630.24	704.08	1583.92	637.52	2586.48	969.43	3518.13	2330.79	8343.98	8825.09	3705.1	7848.65
103988	155196	1077.12	7268.58	754	974.48	2553.2	1141.92	2787.2	1359.82	5023.48	2976.05	12979.7	21542.5	9019.43	13471.1
32826.1	125616	573.21	3527.37	495.04	677.04	1121.12	490.88	2381.6	1100.33	2735.81	2042.81	7570.57	7177.15	3168.69	6767.93
54848.3	130879	607.86	3493.71	526.24	745.68	1419.6	1205.36	2446.08	1029.49	3066.91	1824.9	8417.45	7376.23	3300.62	7167.67
55218.5	80765.2	152.46	8857.53	171.6	341.12	2472.08	4941.04	2741.44	4037.88	1755.6	10086.2	6855.62	27006.9	17960.7	12613.1
90511	156173	664.29	4301.55	485.68	843.44	1924	724.88	3087.76	1048.74	3313.31	2305.38	9302.25	10429.6	4685.49	7885.78
79363.8	125285	564.3	5674.68	483.6	700.96	1976	953.68	2931.76	762.3	2821.28	2102.87	11462.9	15104	6357.92	9977.7
84806.2	77619	422.73	4961.88	276.64	590.72	2050.88	652.08	567.84	907.06	1849.54	1004.08	4435.06	15240.7	6768.72	7393.61
186166	172410	943.47	5022.27	512.72	853.84	1640.08	1018.16	2435.68	1325.94	4468.31	2518.67	10435.9	7617.18	3533.67	9528.19
101299	128940	693.99	4093.65	517.92	743.6	1460.16	707.2	2151.76	730.73	2346.19	1790.25	9139.51	8283.15	3523.4	6698.41
95823.8	176477	891	5453.91	774.8	950.56	1665.04	732.16	2958.8	1218.91	3825.36	2627.24	13431.6	10072.5	4390.03	10971.5
98198.7	154448	830.61	6842.88	611.52	741.52	2388.88	1335.36	3369.6	1098.79	3892.35	2370.06	13659.1	17974.9	8093.55	11278
165584	141450	857.34	5200.47	733.2	1074.32	1602.64	877.76	1395.68	1076.46	4552.24	2095.94	5256.66	9288.82	4047.96	9942.15
137206	143690	554.4	4797.54	487.76	794.56	1401.92	737.36	3038.88	748.44	3100.79	2305.38	10616.8	10679.2	4951.72	8429.3
126281	164177	910.8	7251.75	971.36	1054.56	1937.52	1062.88	2708.16	1256.64	4087.93	2725.03	11286.7	14456.2	6185.7	14089.7
29554.5	9641.61	46.53	124.74	98.8	-44.72	38.48	67.6	143.52	3.85	152.46	116.27	658.07	326.27	-13.43	-16.59
83893.3	155941	880.11	5262.84	538.72	873.6	1717.04	704.08	3047.2	816.2	3762.22	2480.17	12056.2	11531.6	4396.35	9867.1
17612.6	8791.2	-0.99	49.5	52	54.08	107.12	142.48	268.32	64.68	-36.96	-0.77	440.82	70.31	48.19	270.97
118503	43053.1	106.92	522.72	219.44	323.44	287.04	240.24	1335.36	145.53	382.69	2063.6	2235.7	1488.36	698.36	515.87
105660	177243	693	7412.13	535.6	730.08	2731.04	1178.32	2879.76	1552.32	3636.71	2261.49	13669.4	24019.2	9771.51	13841.6
163718	161859	685.08	4815.36	586.56	932.88	1850.16	869.44	3216.72	825.44	3930.85	2821.28	9889.22	9729.64	4414.52	8993.36
98227.9	133530	534.6	3673.89	359.84	604.24	1112.8	791.44	2453.36	454.3	2623.39	1522.29	9382.04	8157.54	3604.77	7495.52
122033	143147	730.62	5728.14	668.72	931.84	1684.8	808.08	2776.8	1162.7	3438.82	2776.62	11406.8	13422.1	5549.75	10455.7
165387	135775	545.49	5221.26	479.44	686.4	1872	845.52	2355.6	1094.94	3037.65	2192.19	10291.3	14037.5	6060.88	9237.47
16856.1	17997.2	85.14	704.88	258.96	1007.76	528.32	277.68	590.72	271.04	1115.73	783.86	1080.72	1399.88	659.65	1708.77
16540.2	62251.2	206.91	6897.33	143.52	342.16	1848.08	6391.84	3416.4	6530.37	1919.61	11263.6	3690.09	12721.4	16148.4	10815.1
50815.4	130241	529.65	5922.18	475.28	888.16	2099.76	887.12	2460.64	697.62	3013.78	2276.89	10996.8	17970.1	7638.51	10386.9
149725	140524	857.34	4885.65	381.68	659.36	1775.28	692.64	3403.92	884.73	4241.93	2387.77	11420.2	9221.67	3980.81	9085.79
46594.4	154020	630.63	5474.7	511.68	854.88	1998.88	1168.96	2315.04	1292.06	3428.81	2487.1	9210.61	14470.4	6857.2	10200.5
155119	134986	583.11	6647.85	388.96	721.76	2357.68	988	2197.52	918.61	2790.48	2390.85	11556.9	19830.6	8780.06	11212.5
5907.33	13706.5	-28.71	-194.04	-66.56	-72.8	97.76	54.08	-94.64	-158.62	-46.2	-46.2	17.38	127.98	32.39	-120.08
84509.7	141452	635.58	4661.91	498.16	865.28	1384.24	793.52	2734.16	850.85	2597.98	2061.29	10364	10090.7	4538.55	8978.35
92581.4	160544	766.26	4390.65	693.68	992.16	1413.36	588.64	2719.6	989.45	3343.34	2438.59	10652.4	7859.71	3499.7	8276.83
145857	77219	144.54	1509.75	353.6	350.48	953.68	388.96	799.76	192.5	66.99	272.58	2887.45	6851.67	2902.46	2453.74
64769.2	147603	726.66	5212.35	494	913.12	1684.8	830.96	3554.72	1001	3699.85	2291.52	10281.1	10815.1	4755.01	8903.3
88227.6	116778	282.15	1348.38	1724.32	1129.44	892.32	455.52	3190.72	420.42	791.56	1297.45	3935.78	1786.19	720.48	2227.8
34215.2	121710	418.77	3250.17	368.16	702	1269.84	477.36	2328.56	381.92	2023.56	1651.65	7811.52	8191.51	3336.17	5539.48
121036	147288	519.75	5270.76	293.28	837.2	2400.32	562.64	2856.88	757.68	2792.02	2257.64	10594.7	12987.6	5871.28	9821.28
72032.5	96917	362.34	2792.79	453.44	532.48	1049.36	482.56	1609.92	303.38	1458.38	1241.24	7060.23	6201.5	2398.44	5705.38
73624.1	184840	1007.82	7563.6	469.04	884	1995.76	1057.68	4511.52	1485.33	5729.57	3833.06	13765.8	14579.5	6499.33	14090.4
68168	123624	577.17	2804.67	403.52	677.04	842.4	449.28	2163.2	859.32	2442.44	1454.53	7273.53	4996.75	2084.02	5433.62
83008.8	121755	559.35	2756.16	433.68	657.28	1126.32	416	2126.8	651.42	1935.01	1438.36	6434.55	4685.49	1704.03	5966.08
185762	149563	679.14	4221.36	614.64	796.64	1412.32	759.2	2855.84	861.63	3594.36	2376.99	9174.27	7036.53	3162.37	7609.28
67451.1	160593	764.28	5224.23	515.84	947.44	1703.52	635.44	2540.72	1203.51	3157	2018.17	12070.4	12976.5	5715.65	10811.9
91203.6	141106	522.72	3408.57	359.84	745.68	1077.44	598	2296.32	796.18	3092.32	1398.32	6134.35	3643.48	1708.77	7153.45
191861	110360	468.27	3724.38	485.68	596.96	1708.72	751.92	2312.96	1008.7	2282.28	1971.2	9367.03	11740.2	5056.79	8108.56
43620.9	140572	777.15	4389.66	667.68	1364.48	1725.36	819.52	1399.84	1461.46	5315.31	2939.09	5683.26	6488.27	3731.96	7746.74
29673.5	9208.98	12.87	297.99	-35.36	185.12	-132.08	13.52	89.44	23.1	73.92	77	674.66	214.88	-40.29	101.91
Single Cells
Patient 14: Sarcoidosis
59666.2	56079.5	132.66	3958.02	2979.6	645.84	1808.56	7713.68	1435.2	3148.53	520.52	3645.95	3855.99	14317.2	9371.77	4868.77
102664	63914.4	139.59	1765.17	48.88	300.56	678.08	214.24	546	52.36	382.69	304.92	3463.36	5178.45	2189.09	2780.01
21733.9	145337	517.77	2722.5	396.24	626.08	760.24	305.76	1926.08	922.46	2209.9	1687.07	10680	4542.5	1934.71	7106.05
60340.9	202142	734.58	4397.58	534.56	595.92	1009.84	670.8	1761.76	903.98	3157.77	1948.87	10195.7	4875.88	2024.77	9094.48
116848	171162	781.11	4509.45	495.04	711.36	1185.6	471.12	3647.28	1083.39	3677.52	2712.71	12838.3	6594.13	2627.54	10032.2
136440	176285	562.32	3321.45	579.28	429.52	790.4	463.84	2424.24	1123.43	1524.6	1795.64	10640.5	5476.28	2460.06	6906.97
48900.5	178210	724.68	4269.87	481.52	578.24	1155.44	786.24	3010.8	992.53	2427.81	1919.61	11847.6	7599.8	3197.92	8873.28
108576	72493.7	126.72	2483.91	2440.88	556.4	1145.04	5553.6	2929.68	2263.8	539.77	3907.75	5699.06	8091.18	5778.85	3659.28
44961.5	175543	687.06	4557.96	451.36	543.92	1269.84	544.96	3167.84	915.53	3025.33	2459.38	13455.3	7256.15	2676.52	8833.78
146670	133293	458.37	3238.29	396.24	349.44	2255.76	841.36	1603.68	957.11	1531.53	1275.89	7843.12	4924.07	1690.6	6117.76
101040	101735	178.2	911.79	465.92	338	528.32	234	1111.76	98.56	251.02	515.9	3031.23	2426.09	1238.72	1785.4
117247	56233	103.95	1203.84	197.6	258.96	2763.28	1958.32	1564.16	1382.92	746.13	3158.54	3212.93	2350.25	2813.98	2339.19
50505.1	126869	588.06	3796.65	690.56	421.2	1029.6	535.6	2622.88	739.2	2369.29	2728.88	12334.3	7030.21	2956.97	8110.93
27160.9	13164	37.62	8.91	-21.12	80.08	-9.6	28.08	-61.6	23.87	-61.63	-48.72	78.21	27.65	-92.78	11.06
86252	193626	611.82	3783.78	797.68	674.96	811.2	414.96	1812.72	745.36	2728.11	2013.55	9130.03	4596.22	2123.52	8020.87
142258	55463.8	100.98	1241.46	1460.16	517.92	481.52	2983.76	1695.2	1403.71	518.98	4113.34	2878.76	1343	1892.84	1919.7
143827	64891.5	99	581.13	49.92	272.48	1342.64	2379.52	862.16	1335.18	148.61	1948.87	3201.08	1800.41	1873.88	1030.95
45441.8	133547	640.53	2782.89	461.76	538.72	943.28	621.92	1444.56	887.04	2711.17	1916.53	7062.6	3987.13	1959.99	6052.98
78750.6	157778	614.79	3417.48	800.8	572	922.48	559.52	2136.16	1251.25	2747.36	1741.74	8458.53	4396.35	1921.28	7393.61
145440	148779	747.45	4331.25	438.88	481.52	1131.52	380.64	2679.04	1051.05	2889.81	2204.51	13138.5	6575.17	2502.72	10336.4
172990	148852	498.96	2688.84	365.04	618.8	971.36	651.04	1863.68	760.76	2423.19	1678.6	7811.52	4557.51	1756.17	5797.02
150619	107740	293.04	1545.39	724.88	522.08	664.56	348.4	1754.48	238.7	320.32	1212.75	7676.43	3495.75	1248.2	2716.02
60213	125952	227.7	882.09	193.44	324.48	306.8	582.4	884	228.69	391.16	641.41	3870.21	1605.28	1145.5	2007.39
158977	175188	440.55	2661.12	887.12	547.04	663.52	221.52	1945.84	619.08	1271.27	1356.74	6220.46	3758.03	1379.34	5229.8
11084	7759.62	40.59	65.34	34.32	138.32	-0.96	-130.96	-124.16	43.12	388.08	149.38	247.27	41.87	28.44	239.37
125548	74336.1	133.65	2156.22	1511.12	451.36	780	1303.12	1262.56	835.45	382.69	2471.7	3934.2	7314.61	3467.31	3152.1
122895	132733	571.23	2852.19	383.76	377.52	775.84	487.76	1683.76	900.13	2746.59	1504.58	7602.17	4432.69	1772.76	6156.47
22837.1	157698	560.34	3354.12	400.4	580.32	1047.28	471.12	1783.6	813.12	2240.7	1496.11	10317.4	4736.84	1815.42	7022.31
29066	166602	734.58	3956.04	445.12	450.32	1042.08	425.36	3138.72	946.33	2903.67	2177.56	12944.9	6265.49	2156.7	8595.99
15495.3	63132.3	161.37	1041.48	589.68	1938.56	1149.2	516.88	446.16	405.02	1823.36	1123.43	2733.4	1360.38	595.66	1894.42
23733	92098.7	256.41	1181.07	250.64	305.76	755.04	248.56	1415.44	195.58	277.97	524.37	5954.23	2400.81	1151.82	1926.02
105965	183424	755.37	4045.14	378.56	602.16	1159.6	483.6	2675.92	927.08	2869.02	2795.1	11182.5	5020.45	2136.16	7803.62
100174	74982.6	160.38	3005.64	161.2	220.48	1033.76	3938.48	1543.36	2362.36	774.62	5423.11	4443.75	8765.05	5943.96	4819
136621	104610	386.1	2712.6	412.88	279.76	657.28	217.36	1262.56	553.63	1009.47	1155	5537.9	4413.73	1689.81	5236.12
144258	223234	1079.1	5607.36	531.44	745.68	1142.96	666.64	3203.2	1261.26	5215.98	3488.87	14646.6	6966.22	3188.44	11411.5
82683.2	162798	693	4301.55	535.6	600.08	1308.32	653.12	2699.84	1319.01	2884.42	2255.33	12809.9	7456.02	3246.11	9254.85
19147.6	20210.8	32.67	584.1	95.68	15.6	329.68	287.04	351.52	-4.61	575.19	221.76	716.53	778.94	476.37	1284.54
67793.8	74698.5	245.52	2372.04	2451.28	484.64	943.28	5019.04	2193.36	2918.3	1145.76	5149.76	3025.7	6044.29	5672.2	3646.64
141188	179227	974.16	6155.82	390	620.88	1796.08	654.16	3529.76	1205.05	3538.15	2664.97	16871.2	11619.3	4551.19	11471.6
117900	65771.6	154.44	1006.83	1369.68	499.2	683.28	2354.56	1869.92	1142.68	504.35	3729.88	2095.87	3111.02	2081.65	1565.78
99042.8	73714.4	161.37	736.56	133.12	198.64	368.16	109.2	1385.28	30.8	182.49	535.92	4356.85	1794.88	653.33	1149.45
150305	145434	538.56	2997.72	431.6	529.36	720.72	683.28	1046.24	630.63	2154.46	1110.34	4237.56	2684.42	1149.45	6144.62
80238.6	75382.6	147.51	1873.08	170.56	388.96	775.84	4189.12	1260.48	1138.06	607.53	283.36	2859.8	6215.72	4076.4	2456.9
142091	169480	616.77	3075.93	396.24	553.28	1015.04	317.2	1926.08	921.69	2212.98	1446.83	8207.31	4939.87	2246.76	6030.86
31465.3	200434	640.53	3950.1	958.88	699.92	1249.04	362.96	2835.04	841.61	2691.15	2323.09	10801.7	6438.5	2913.52	8708.96
102213	77927.9	138.6	920.7	2114.32	630.24	882.96	10109.8	2377.44	3779.93	634.48	3694.46	1580	2211.21	4823.74	1294.81
55544.9	178707	682.11	3945.15	360.88	547.04	1084.72	576.16	2734.16	1061.83	3086.16	2515.59	11161.9	7692.23	3188.44	8164.65
90221.9	106552	198	1137.51	182	324.48	581.36	1440.4	2475.2	1651.65	551.32	9264.64	3170.27	1560.25	1805.15	1678.75
130192	169744	719.73	3889.71	529.36	492.96	925.6	353.6	3377.92	699.16	3582.81	2257.64	10605	5308.8	2612.53	8676.57
15893	192448	979.11	5325.21	481.52	710.32	1642.16	1297.92	2982.72	1399.86	3907.75	2420.11	14997.4	8475.12	3758.82	10221
4539.24	12673	0.99	-99	-54.88	-13.44	16.64	-57.76	-123.2	-23.36	83.93	-45.8	51.35	13.43	-209.07	-60.38
109041	160277	510.84	3482.82	536.64	464.88	998.4	412.88	2891.2	497.42	2025.1	1633.17	9045.5	5391.75	2578.56	6040.34
113295	79250.5	263.34	1633.5	195.52	217.36	400.4	323.44	1101.36	371.91	1361.36	1036.42	5633.49	3333.01	1389.61	3324.32
38173.7	162811	443.52	3168	446.16	459.68	795.6	412.88	1717.04	1114.96	1750.21	1692.46	10068.5	4510.9	2075.33	6803.48
127989	164462	301.95	1277.1	2481.44	808.08	598	313.04	2324.4	273.35	773.08	1000.23	6730.01	3133.14	929.04	3130.77
106888	160793	680.13	3525.39	709.28	620.88	1055.6	442	4057.04	790.79	3408.79	2976.05	12029.3	6898.28	3066.78	8049.31
16473	85799.3	340.56	2003.76	281.84	303.68	608.4	256.88	993.2	354.2	992.53	1044.89	6450.35	3064.41	1064.13	4031.37
177007	229530	1119.69	5556.87	693.68	719.68	1497.6	664.56	3603.6	1660.89	3916.22	3216.29	14433.3	7621.13	3585.02	12162
107941	137377	673.2	4056.03	243.36	542.88	1153.36	823.68	2354.56	626.01	1958.88	1432.97	11692	9153.73	4110.37	7569.78
103588	73975.8	167.31	4873.77	3880.24	834.08	1899.04	6180.72	1957.28	2587.2	1317.47	10020.8	5509.46	18606.9	10022.7	6209.4
119877	171720	417.78	3312.54	343.2	402.48	952.64	500.24	2375.36	728.42	1643.18	1768.69	8641.81	4478.51	1587.9	6471.68
76702.9	140568	514.8	3076.92	380.64	517.92	881.92	556.4	2883.92	667.59	1717.87	1268.19	8456.95	5127.1	1768.81	6518.29
113784	96062.7	113.85	1297.89	170.56	201.76	2605.2	1173.12	1780.48	528.22	241.78	1854.16	2313.91	4699.71	2012.13	1732.47
136048	176943	731.61	4149.09	435.76	507.52	919.36	219.44	2560.48	937.86	3247.86	2616.46	10630.2	5703.01	2522.47	8456.95
90869.9	199549	733.59	4493.61	1056.64	698.88	1234.48	504.4	3239.6	957.11	2848.23	2723.49	11119.2	5653.24	2313.12	9231.15
100761	206764	745.47	4855.95	1086.8	685.36	1315.6	535.6	3660.8	1447.6	3734.5	3116.96	14203.4	7921.33	3280.87	10097
206074	180072	708.84	4760.91	495.04	665.6	994.24	353.6	2949.44	738.43	2751.98	2010.47	10985	6115.39	2783.17	9557.42
148388	191180	828.63	4293.63	1619.28	823.68	1199.12	499.2	2459.6	1119.58	3761.45	2862.86	9888.43	5492.08	2388.96	8228.64
109900	75991.4	199.98	551.43	1901.12	480.48	239.2	230.88	1782.56	128.59	206.36	1365.21	3347.23	1364.33	433.71	1139.18
6187.59	6794.37	3.96	185.13	166.4	-3.84	-101.04	-114.56	174.72	80.08	180.18	162.47	353.92	313.63	132.72	343.65
25066.3	95044.9	371.25	2121.57	404.56	230.88	540.8	250.64	1629.68	492.8	1412.18	1285.9	5917.1	3142.62	1241.88	4600.17
95579.2	133600	663.3	4009.5	219.44	391.04	1061.84	556.4	2726.88	800.8	2744.28	2151.38	11865	5661.14	2285.47	7767.28
105716	167787	237.6	1450.35	2363.92	691.6	845.52	487.76	2015.52	553.63	531.3	1251.25	6405.32	4297.6	1809.89	2803.71
88703.1	66035	164.34	5187.6	4390.88	998.4	1877.2	8072.48	3008.72	3939.32	1149.61	11533.8	4821.37	17429.8	10447	6970.96
60689.2	136326	537.57	3143.25	1201.2	2882.88	2164.24	552.24	1538.16	669.9	3649.8	2192.96	6993.08	3462.57	2034.25	5453.37
62284.9	190911	791.01	4387.68	452.4	572	981.76	463.84	2800.72	1081.08	2544.85	2249.17	11878.4	5915.52	2456.9	8831.41
103191	178136	1014.75	5461.83	440.96	551.2	1246.96	682.24	3310.32	1965.81	5008.85	2670.36	14320.3	6774.25	2719.18	11402.9
118290	161604	522.72	2855.16	1085.76	3127.28	2348.32	790.4	1480.96	933.24	10979.4	5653.34	6171.48	3344.86	2204.1	7014.41
78254.1	180980	906.84	5070.78	956.8	830.96	1500.72	640.64	3572.4	978.67	3293.29	2977.59	15936.7	8753.2	3419.91	9975.33
103149	160683	645.48	3974.85	531.44	673.92	1312.48	846.56	2961.92	1213.52	2659.58	1918.07	12825.6	7042.85	2695.48	8278.41
44355.6	150755	470.25	3055.14	590.72	445.12	916.24	438.88	2088.32	582.12	1997.38	1534.61	9659.33	5318.28	2459.27	5831.78
12807.7	16988.4	24.75	224.73	88.4	227.76	35.36	-10.56	191.36	-51.64	151.69	62.37	601.98	346.02	-51.07	277.29
30355.6	176337	672.21	4182.75	446.16	531.44	929.76	528.32	2688.4	835.45	2706.55	1571.57	11883.2	5576.61	2145.64	8982.3
8178.57	169236	767.25	3156.12	1254.24	4089.28	2834	1176.24	1910.48	876.26	4075.61	2554.09	8886.71	4518.01	1980.53	7125.8
81146.6	158069	568.26	2671.02	294.32	402.48	718.64	236.08	1537.12	910.14	2293.06	1589.28	6899.86	3498.91	1542.87	5225.06
13267	150604	425.7	2423.52	362.96	508.56	731.12	433.68	1246.96	745.36	1613.92	1074.15	7269.58	3415.17	1417.26	4498.26
231978	180869	1222.65	5410.35	1328.08	710.32	1389.44	566.8	3944.72	1670.13	4005.54	3146.22	15073.2	7534.23	3099.17	11438.4
30702.2	197271	840.51	4044.15	1130.48	3636.88	2384.72	892.32	2304.64	1161.16	4769.38	3277.12	9913.71	4676.8	2230.17	7952.93
212089	147175	278.19	2017.62	2902.64	946.4	998.4	521.04	2411.76	505.89	904.75	970.97	7337.52	4883.78	1977.37	3630.05
9178.11	182155	556.38	2514.6	433.68	506.48	798.72	465.92	1449.76	595.21	1861.86	1295.91	7273.53	3550.26	1538.13	4973.05
76931.4	198605	692.01	3298.68	741.52	709.28	1204.32	563.68	2349.36	1058.75	3001.46	2353.12	9189.28	4691.81	2101.4	7303.55
119465	168753	584.1	4014.45	610.48	518.96	1012.96	656.24	2878.72	757.68	2366.98	1786.4	10144.4	5876.02	2298.11	7726.2
75853.3	182079	729.63	3384.81	1294.8	773.76	1231.36	602.16	2706.08	881.65	3277.89	3128.51	11889.5	5210.84	2381.85	7023.1
111391	181169	718.74	3667.95	1251.12	926.64	1152.32	351.52	2224.56	656.04	2772.77	2020.48	9905.02	5021.24	2474.28	7279.85
49665.2	117347	276.21	1954.26	1202.24	521.04	551.2	309.92	1296.88	387.31	819.28	757.68	4807.94	2663.09	1230.82	3509.97
151594	193313	745.47	4167.9	635.44	650	1064.96	538.72	2994.16	844.69	3004.54	2661.89	11567.2	5791.49	2136.16	8678.94
137498	144465	623.7	3496.68	310.96	410.8	824.72	400.4	2317.12	788.48	2061.29	1440.67	9830.76	6060.09	2561.97	7253.78
28149.9	214465	335.61	1798.83	1125.28	813.28	841.36	295.36	2945.28	480.48	551.32	796.18	8732.66	3735.91	1427.53	3765.14
67536.2	76906.2	109.89	1358.28	135.2	248.56	428.48	1908.4	974.48	1449.14	790.02	485.1	3454.67	1549.98	2452.16	2642.55
86781.8	156368	720.72	4721.31	352.56	620.88	1363.44	717.6	2684.24	908.6	2715.79	2259.95	13563.5	9262.75	3995.03	8267.35
Single Cells
Patient 15: Sarcoidosis
182510	139315	659.2	2933.44	287.7	447.3	677.25	325.5	352.8	985.77	2057.4	650.43	2045.08	2933.14	1530.94	5242.26
220180	165257	1010.43	5609.38	388.5	535.5	1400.7	547.05	715.05	1453.95	2858.49	1298.43	4417.34	9994.98	4288.6	9998.26
7530.6	10211.4	36.05	22.66	48.3	16.8	80.85	50.4	4.2	-4.86	82.62	44.55	53.3	15.58	-13.94	68.06
165421	167146	694.22	4194.16	693	399	1124.55	784.35	751.8	1766.61	1910.79	989.01	3284.1	7028.22	3424.32	7189.76
159171	146165	696.28	3540.11	334.95	358.05	1044.75	727.65	215.25	1176.12	1841.94	579.15	2820.8	7829.36	3640.8	5507.12
126161	176483	1722.16	5304.5	407.4	511.35	1098.3	948.15	762.3	2576.61	6423.3	2350.62	4099.18	4667.44	2493.62	9958.08
159399	153588	1121.67	4837.91	394.8	549.15	1394.4	481.95	762.3	1540.62	3492.72	1178.55	3694.1	7648.14	3693.28	8382.86
6062.28	9268.97	-9.27	28.84	139.65	38.85	31.5	240.45	-78.75	82.62	-130.41	-32.4	31.16	14.76	-26.24	75.44
84339.4	140577	1071.2	3106.48	389.55	386.4	1090.95	560.7	591.15	1790.1	3248.1	1526.04	3076.64	3568.64	1826.96	5973.7
156444	138284	728.21	4464.02	446.25	379.05	1138.2	432.6	420	878.85	2629.26	1255.5	3271.8	9202.04	4087.7	6646.1
9378.6	2539.98	36.05	2.06	6.3	7.35	71.4	-100.8	-40.95	-150.66	-8.1	113.4	7.38	113.98	79.54	109.06
167051	56434.7	310.03	352.26	116.55	276.15	827.4	344.4	429.45	515.97	588.06	3035.88	573.18	527.26	172.2	652.72
203332	173256	1059.87	3314.54	403.2	533.4	838.95	355.95	832.65	1926.18	3629.61	1246.59	2722.4	1822.04	1207.04	7482.5
197918	166693	1129.91	4076.74	520.8	531.3	955.5	715.05	674.1	1952.1	3491.91	1189.89	3600.62	2057.38	1392.36	8272.98
156633	174380	922.88	7486.04	389.55	644.7	2249.1	1055.25	826.35	1264.41	3042.36	880.47	5491.54	20097.4	9216.8	12200
152430	158069	750.87	2337.07	283.5	319.2	883.05	830.55	383.25	898.29	3456.27	1246.59	2144.3	2116.42	1338.24	4550.18
167956	162244	792.07	3184.76	445.2	420	1123.5	562.8	427.35	915.3	2249.37	781.65	2692.06	4613.32	2354.22	5797.4
147260	120580	611.82	2702.72	1313.55	425.25	995.4	449.4	600.6	863.46	1147.77	443.07	2444.42	7036.42	3326.74	4780.6
207073	103898	648.9	3606.03	890.4	1403.85	1278.9	844.2	604.8	1491.21	6663.06	3042.36	2886.4	1754.8	1743.32	6995.42
87539.8	198532	1768.51	5921.47	596.4	779.1	1245.3	766.5	1227.45	3382.56	6096.87	2087.37	5355.42	3765.44	1881.9	13427.5
33827.6	178099	1478.05	11262	395.85	718.2	3168.9	1111.95	903	2685.15	4877.82	1858.14	8238.54	22785.3	10760.9	19210.1
186045	165074	979.53	4482.56	422.1	490.35	1039.5	540.75	656.25	1541.43	3323.43	1453.14	3587.5	3243.92	1813.84	8865.84
152377	136713	983.65	3243.47	222.6	467.25	763.35	662.55	580.65	1435.32	3016.44	1162.35	2621.54	3652.28	1779.4	5963.86
157266	183900	879.62	3236.26	255.15	385.35	622.65	534.45	498.75	1601.37	2535.3	1048.95	2578.9	1927	1240.66	5560.42
225790	174909	996.01	5554.79	435.75	498.75	1565.55	840	779.1	2155.41	3429.54	1226.34	4443.58	9004.42	4314.84	10275.4
217639	185914	925.97	3583.37	667.8	327.6	714	571.2	814.8	2025.81	2975.13	1110.51	2839.66	2454.26	1302.16	6909.32
93666.7	160875	888.89	4678.26	388.5	395.85	1338.75	809.55	288.75	1509.03	2600.1	1046.52	3428.42	10418.1	4957.72	7454.62
124817	153638	832.24	5188.11	453.6	599.55	1580.25	1069.95	930.3	1531.71	3645.81	1368.9	3951.58	10715.8	4892.12	7969.58
61026	42230	184.37	998.07	110.25	165.9	1799.7	6028.05	2095.8	2912.76	481.95	4028.13	489.54	1002.04	3918.78	1721.18
177883	189588	1096.95	5485.78	388.5	628.95	1537.2	592.2	728.7	2557.98	3623.13	1294.38	4330.42	8947.02	4340.26	9885.1
167048	76076.8	390.37	883.74	664.65	288.75	343.35	244.65	957.6	257.58	436.59	689.31	936.44	1384.98	641.24	1439.1
245013	172522	1444.06	6241.8	453.6	516.6	1123.5	936.6	740.25	2723.22	4915.08	1506.6	4811.76	4392.74	2428.02	11362.7
73747	186953	1208.19	4941.94	563.85	538.65	1173.9	780.15	775.95	2477.79	3793.23	1540.62	3948.3	6481.28	3208.66	9401.3
160347	92924.5	465.56	825.03	905.1	602.7	571.2	220.5	614.25	507.87	620.46	413.1	812.62	814.26	291.92	1157.02
74000.6	142296	588.13	2478.18	234.15	456.75	831.6	280.35	607.95	880.47	2450.25	980.1	2291.9	1995.88	1232.46	5263.58
239093	178805	871.38	4451.66	477.75	456.75	1092	654.15	737.1	1593.27	2837.43	1100.79	3416.12	6003.22	3143.06	7846.58
19567.8	5999.75	22.66	-20.6	74.55	-79.8	42	-64.05	124.95	-82.62	-136.08	46.17	89.38	-60.68	19.68	60.68
180905	137137	544.87	4187.98	1926.75	556.5	1522.5	950.25	952.35	712.8	822.15	684.45	3307.88	13620.2	5863.82	6245.94
205712	186435	1576.93	5955.46	507.15	611.1	1226.4	357	966	2618.73	5257.71	1595.7	4618.24	3340.68	1865.5	12252.4
163679	140645	681.86	2790.27	266.7	340.2	772.8	573.3	553.35	1435.32	2400.03	696.6	2223.84	2153.32	1191.46	4997.08
199884	183650	1123.73	5211.8	712.95	817.95	1190.7	613.2	564.9	2194.29	3417.39	1705.86	4382.9	6324.66	2903.62	9852.3
152365	185286	1152.57	7326.39	446.25	564.9	2186.1	1000.65	651	1914.84	4084.83	1405.35	5993.38	18243.4	8344.32	12356.6
154860	115697	790.01	5091.29	279.3	263.55	1433.25	346.5	610.05	1605.42	2240.46	1007.64	3445.64	8324.64	3847.44	8233.62
61798	163176	862.11	3578.22	529.2	535.5	939.75	521.85	499.8	1496.88	2320.65	956.61	2940.52	4017.18	2207.44	6368.94
152951	45184	226.6	970.26	27.3	154.35	151.2	663.6	517.65	337.77	165.24	252.72	313.24	337.84	635.5	895.44
147623	170707	799.28	5520.8	273	381.15	1878.45	877.8	637.35	1306.53	2613.87	577.53	4375.52	14795.3	6909.32	9048.7
190984	166948	1065.02	7573.59	512.4	507.15	2123.1	1014.3	612.15	1987.74	4051.62	1220.67	5744.1	18340.9	8487.82	12156.5
106878	137643	804.43	4140.6	412.65	435.75	1480.5	724.5	612.15	1513.89	2749.95	821.34	3188.16	8611.64	4112.3	6901.12
19316.6	18771.8	37.08	-6.18	12.6	-73.5	-30.45	4.2	109.2	83.43	142.56	204.12	77.08	9.02	56.58	22.14
164370	201189	1044.42	6057.43	421.05	551.25	1646.4	703.5	792.75	2107.62	3892.05	1387.53	4901.14	12120.4	5747.38	10384.5
115849	66397.9	348.14	560.32	227.85	205.8	943.95	291.9	613.2	1157.49	437.4	4059.72	382.94	570.72	974.98	772.44
173959	172306	1063.99	4641.18	366.45	573.3	1228.5	745.5	452.55	1681.56	3957.66	1257.12	3565.36	4967.56	2652.7	8220.5
196804	100794	602.55	2183.6	1939.35	563.85	900.9	661.5	883.05	672.3	933.93	618.84	1822.86	6005.68	2814.24	3321.82
84663.6	152886	1125.79	4061.29	367.5	449.4	915.6	577.5	620.55	1498.5	3222.18	962.28	2936.42	3505.5	1772.02	7203.7
106611	135566	542.81	2023.95	417.9	334.95	589.05	312.9	412.65	942.84	2583.9	874.8	2048.36	1048.78	714.22	4014.72
106831	149776	646.84	2274.24	246.75	423.15	756	158.55	453.6	1146.15	2080.89	723.33	2045.08	2738.8	1358.74	4202.5
152636	133081	779.71	4476.38	508.2	390.6	1096.2	397.95	714	1648.35	2622.78	920.97	3338.22	6688.74	3093.86	7786.72
231428	94896	507.79	4072.62	858.9	340.2	1505.7	707.7	835.8	803.52	751.68	370.98	3065.98	14259.8	6037.66	5200.44
40430.9	132841	975.41	4613.37	247.8	415.8	1269.45	862.05	859.95	2071.98	3308.04	1060.29	3890.9	9290.6	4681.38	7940.88
96427.8	73234	306.94	934.21	142.8	152.25	340.2	488.25	170.1	844.83	354.78	267.3	619.92	427.22	1136.52	1432.54
77834.4	170060	863.14	2999.36	1489.95	578.55	1000.65	1002.75	699.3	1416.69	2805.84	1367.28	2491.98	5451.36	2651.88	5367.72
235954	147447	953.78	4877.05	581.7	556.5	1526.7	868.35	540.75	1431.27	3327.48	1181.79	3803.16	11001.9	4911.8	8250.02
192359	106461	819.88	2462.73	450.45	353.85	737.1	501.9	178.5	1359.18	2352.24	785.7	2065.58	1228.36	917.58	4596.1
111384	154242	896.1	3943.87	378	368.55	817.95	448.35	890.4	1505.79	3363.12	828.63	2771.6	4991.34	2633.84	6447.66
176744	170012	944.51	4345.57	815.85	421.05	1066.8	628.95	669.9	1926.99	2664.9	1019.79	3052.04	4464.08	2250.08	7465.28
245673	172625	983.65	3471.1	215.25	500.85	787.5	379.05	780.15	1581.12	2459.16	1091.07	3088.94	2824.08	1662.14	6922.44
68008.9	66269.2	301.79	3583.37	187.95	245.7	2898	5416.95	2028.6	2696.49	456.03	5254.47	2431.3	13445.5	7571.06	4346
12606.7	20715.4	24.72	31.93	-21	-40.95	35.7	22.05	5.25	-122.31	-58.32	60.75	81.18	31.98	-36.08	52.48
14228.8	10445.2	0	94.76	4.2	-64.05	-39.9	55.65	0	73.71	-119.88	51.03	20.5	22.14	-11.48	54.12
176692	213942	1181.41	5280.81	982.8	896.7	1993.95	1002.75	1123.5	1848.42	3039.12	1653.21	5045.46	11236.5	5360.34	9174.16
79684.1	153282	786.92	3779.07	269.85	319.2	1235.85	463.05	668.85	1161.54	2692.44	1091.07	3016.78	7965.48	3872.86	7269.3
120177	75153.9	425.39	522.21	257.25	298.2	982.8	1706.25	1071	1226.34	471.42	3957.66	631.4	1080.76	1268.54	879.86
104142	77790.8	1014.55	4502.13	890.4	2127.3	1260	588	1008	2152.17	7761.42	3146.85	3621.12	2117.24	1818.76	8822.38
39060	170433	1650.06	5410.59	658.35	645.75	1035.3	712.95	945	2521.53	6358.5	2743.47	4523.12	4167.24	2160.7	10361.5
197448	48983.7	257.5	282.22	2419.2	486.15	364.35	347.55	1251.6	751.68	593.73	4320.54	414.92	259.94	259.94	555.96
159104	161454	1005.28	3144.59	369.6	620.55	758.1	454.65	658.35	1740.69	3671.73	1155.87	2633.84	1725.28	1028.28	6299.24
182305	148307	821.94	2752.16	732.9	387.45	807.45	305.55	919.8	1645.92	2410.56	969.57	2665	4046.7	2053.28	6079.48
101708	85355.1	754.99	4756.54	930.3	2285.85	1613.85	791.7	1156.05	1792.53	5403.51	2233.17	3628.5	2005.72	1700.68	9578.42
147715	167108	967.17	4936.79	376.95	434.7	1082.55	677.25	575.4	1830.6	2873.88	1077.3	3824.48	5041.36	2492.8	9725.2
175412	157079	1646.97	7082.28	364.35	625.8	1722	867.3	873.6	2810.7	5548.5	2093.04	5682.6	10585.4	5198.8	13676.8
145685	151033	941.42	6770.19	630	653.1	2147.25	1015.35	718.2	1683.99	3826.44	1233.63	5269.32	17748.1	8127.84	11493.1
155319	138227	714.82	3920.18	273	477.75	1200.15	376.95	745.5	1027.89	2394.36	972.81	3017.6	7534.98	3587.5	5899.08
80271.2	141313	827.09	3045.71	446.25	441	575.4	218.4	520.8	1446.66	2089.8	755.73	2296.82	2245.98	1062.72	5987.64
161296	177440	651.99	3206.39	439.95	399	892.5	375.9	444.15	1394.82	2105.19	581.58	2674.02	4920.82	2236.96	6068
114699	119747	767.35	4221.97	2061.15	678.3	1325.1	750.75	558.6	631.8	1326.78	779.22	3492.38	12969.1	5623.56	6534.58
187871	168435	1792.2	8714.83	534.45	641.55	1749.3	509.25	1229.55	3647.43	7545.15	2971.08	6653.48	10528	5300.48	16969.9
154174	152246	1008.37	4098.37	1148.7	572.25	918.75	421.05	1218	1762.56	3852.36	2075.22	3113.54	4403.4	2237.78	8020.42
150472	141543	793.1	3407.24	210	338.1	956.55	568.05	702.45	1300.86	2724.84	954.18	2605.96	3589.14	1804	6263.98
129946	194457	1073.26	3967.56	361.2	604.8	1005.9	355.95	411.6	1828.17	3229.47	821.34	3398.9	4636.28	2398.5	7236.5
11509.7	21946.2	4.12	69.01	66.15	-65.1	67.2	102.9	33.6	-98.82	-29.97	-44.55	-20.5	70.52	95.12	-45.1
115902	159904	1030	4504.19	444.15	376.95	1789.2	1760.85	1624.35	2091.42	3944.7	2015.28	3747.4	4300.9	2414.08	8878.96
147455	104499	1008.37	5000.65	899.85	2283.75	1302	745.5	968.1	1951.29	6458.13	2187.81	3659.66	2199.24	1574.4	10241
184015	129583	1096.95	4548.48	349.65	556.5	1114.05	463.05	649.95	2065.5	3248.91	1548.72	3769.54	4710.9	2286.98	8855.18
123720	173191	1140.21	8285.32	804.3	652.05	2179.8	865.2	716.1	2144.07	4481.73	1566.54	6525.56	14745.2	7017.56	15319.2
105118	56547	337.84	587.1	159.6	238.35	402.15	126	54.6	383.13	319.95	81	663.38	720.78	856.9	842.96
200723	145174	738.51	3952.11	723.45	349.65	743.4	441	564.9	1510.65	2268	829.44	3136.5	4072.12	2277.96	6874.88
20802.6	5105.71	-14.42	-14.42	1.05	-39.9	38.85	-57.75	2.1	17.01	-96.39	-57.51	-24.6	39.36	-107.42	72.16
127200	203534	1017.64	4196.22	373.8	500.85	1063.65	644.7	621.6	2254.23	3200.31	1280.61	3701.48	4679.74	2437.04	8614.92
147309	53737.2	170.98	4417.67	3135.3	568.05	2163	8442	2127.3	3092.58	599.4	4493.07	2942.16	17491.4	11739.1	5940.9
231114	144965	991.89	4597.92	418.95	517.65	1095.15	614.25	781.2	2080.08	3291.84	1017.36	3908.12	6929.82	3668.68	8735.46
Single Cells
Patient 16: Behcets Disease
47634.5	47944.7	175.23	2815.56	3610.18	739.37	1281.86	6134.31	2052.26	2083.62	1777.93	5726.49	2088	10364	6885.6	4296.8
61713.1	23638.2	76.23	125.73	22.47	39.59	83.46	-17.12	211.86	294.91	100.87	-100.87	172	13.6	31.2	72.8
8165.61	3458.07	36.63	26.73	51.36	155.15	-43.87	-23.54	98.44	177.1	-10.01	-8.47	33.6	16	42.4	111.2
23012.9	5482.62	40.59	340.56	64.2	105.93	170.13	-58.85	169.06	72.38	136.29	-5.39	-21.6	50.4	10.4	165.6
8592.48	3245.22	-23.76	1.98	34.24	113.42	58.85	-37.45	-176.55	-90.86	39.27	-17.71	-91.2	-76	-61.6	-191.2
197787	154840	647.46	4845.06	1775.13	1386.72	1561.13	1641.38	2108.97	1666.28	8254.4	6704.39	3437.6	4698.4	3708.8	7326.4
30246.2	12562.1	-8.91	103.95	-43.87	81.32	185.11	218.28	-71.69	107.03	73.15	-37.73	29.6	88.8	-40	42.4
18608.1	7715.07	76.23	103.95	-16.05	65.27	84.53	9.63	-4.28	-118.58	9.24	-34.65	-65.6	63.2	60	-102.4
17719.6	8121.96	-30.69	-28.71	1.07	130.54	33.17	163.71	-7.49	31.57	10.78	-46.2	92.8	-98.4	-120.8	-216
144626	79098	285.12	3181.86	3875.54	644.14	409.81	480.43	2901.84	899.36	1539.23	5551.7	1096.8	811.2	1160.8	3131.2
58590.5	19503	61.38	90.09	35.31	71.69	66.34	-49.22	22.47	25.41	127.05	-60.06	189.6	-15.2	-28	138.4
25387	9356.49	73.26	-4.95	17.12	73.83	-79.18	129.47	104.86	29.26	-10.01	-119.35	72	20	-183.2	-8
48431.5	54941	132.66	881.1	456.89	313.51	403.39	331.7	312.44	215.6	488.18	294.14	821.6	634.4	439.2	1904
208802	119811	395.01	5601.42	391.62	500.76	1906.74	1778.34	640.93	740.74	735.35	388.85	4055.2	18213.6	8465.6	7628.8
28054.3	14335.2	-18.81	156.42	54.57	67.41	49.22	17.12	-94.16	131.67	81.62	-75.46	18.4	4.8	114.4	5.6
15184.3	19511.9	36.63	387.09	156.22	253.59	272.85	-93.09	36.38	32.34	84.7	0	260.8	320	97.6	461.6
53287.5	11149.4	82.17	65.34	111.28	82.39	143.38	-125.19	37.45	98.56	-178.64	28.49	310.4	113.6	41.6	-95.2
56248	28890.2	5.94	369.27	39.59	-26.75	111.28	-19.26	-85.6	-157.08	30.03	65.45	278.4	52.8	120	216.8
22163.2	8352.63	26.73	-165.33	-32.1	-16.05	-25.68	133.75	65.27	-197.89	-24.64	-3.08	73.6	191.2	98.4	71.2
156782	66033	297.99	801.9	214	204.37	665.54	302.81	826.04	328.02	197.89	1725.57	899.2	1707.2	706.4	1320
137263	74542	314.82	1478.07	159.43	311.37	2486.68	4300.33	1927.07	1829.52	689.92	3766.84	1431.2	4616	3244	1876.8
59670.3	19907.9	65.34	427.68	16.05	7.49	65.27	-43.87	171.2	-143.22	170.94	9.24	107.2	159.2	87.2	357.6
34043.5	14500.5	-17.82	180.18	-25.68	131.61	50.29	203.3	138.03	-27.72	-76.23	-0.77	303.2	117.6	47.2	614.4
29530.2	12735.4	61.38	21.78	22.47	8.56	-2.14	-124.12	332.77	-108.57	-83.16	70.84	167.2	76.8	-26.4	48.8
40217.3	16070.7	44.55	161.37	31.03	115.56	-27.82	46.01	20.33	-22.33	137.06	-63.14	177.6	7.2	26.4	184.8
173799	96380.5	260.37	4593.6	404.46	284.62	1078.56	1191.98	446.19	286.44	661.43	237.93	3067.2	13048.8	5792	5009.6
30873.2	5644.98	19.8	108.9	82.39	1.07	0	63.13	82.39	-189.42	16.17	-158.62	436.8	193.6	23.2	-59.2
177427	109396	481.14	6921.09	1142.76	470.8	2426.76	1518.33	506.11	415.03	647.57	625.24	5700	24660.8	11027.2	9404.8
10496.8	4502.52	13.86	-54.45	-13.91	-14.98	-169.06	-32.1	-128.4	-93.94	41.58	-87.01	183.2	-4	-64.8	-121.6
31354.3	9504.99	8.91	24.75	129.47	131.61	1.07	-28.89	-235.4	-87.78	-110.11	-53.13	36	32.8	29.6	80.8
26003.4	10937.5	-1.98	-132.66	19.26	40.66	-47.08	-18.19	53.5	-53.9	61.6	-173.25	-75.2	-107.2	68.8	-84
123702	68116	198	7421.04	131.61	285.69	3759.98	4071.35	1698.09	1065.68	626.78	3801.49	5288.8	30064	13932	9563.2
28533.9	12319.6	17.82	107.91	20.33	53.5	8.56	-84.53	119.84	-61.6	-106.26	-77	139.2	-28.8	74.4	88.8
30889.3	14535.2	32.67	153.45	50.29	145.52	82.39	-65.27	-9.63	147.07	134.75	-44.66	212	33.6	97.6	184
29206.2	15231.2	69.3	302.94	60.99	103.79	88.81	56.71	-18.19	-136.29	221.76	107.03	132.8	237.6	263.2	436
60775.9	57239.8	214.83	2645.28	774.68	235.4	949.09	858.14	277.13	241.01	115.5	271.81	2431.2	9070.4	4204.8	3223.2
123135	38928.8	186.12	487.08	3317	782.17	527.51	401.25	1795.46	527.45	353.43	5634.86	828	1252.8	778.4	541.6
95648	59987.1	87.12	10812.8	8.56	269.64	2564.79	2370.05	1442.36	803.11	1346.73	528.22	6384	36876	16971.2	12730.4
220435	91110.7	389.07	4758.93	3796.36	874.19	1796.53	2438.53	1183.42	1684.76	1760.22	8270.57	3916.8	14261.6	7584.8	6776.8
20345.6	11520.6	49.5	140.58	83.46	44.94	248.24	-27.82	-67.41	77.77	128.59	0.77	186.4	-101.6	42.4	260
55248.5	9241.65	30.69	692.01	759.7	34.24	373.43	2515.57	757.56	776.16	987.14	1621.62	260.8	285.6	1123.2	1270.4
6609.6	10819.7	69.3	155.43	3.21	75.97	38.52	143.38	55.64	199.43	-80.85	38.5	93.6	-16	117.6	237.6
21915.4	6915.15	19.8	6.93	27.82	31.03	97.37	402.32	74.9	6.16	25.41	66.22	43.2	165.6	230.4	52.8
32531.2	8480.34	112.86	205.92	-23.54	132.68	-10.7	86.67	108.07	-7.7	149.38	-27.72	-107.2	-120	86.4	-49.6
127267	45292.5	139.59	3266.01	218.28	84.53	795.01	1324.66	1855.38	2261.49	1088.01	9086	1580	7750.4	6417.6	4750.4
34766	16530	74.25	194.04	-94.16	78.11	200.09	-81.32	-8.56	157.08	-127.82	147.07	212	113.6	98.4	-68.8
22884.9	11811.7	73.26	37.62	17.12	142.31	-42.8	176.55	-154.08	-106.26	50.05	24.64	200.8	-37.6	-46.4	196
105821	74560.9	268.29	5686.56	71.69	216.14	1311.82	714.76	528.58	1438.36	793.87	387.31	3261.6	16195.2	10715.2	7916
25217.7	9198.09	104.94	99	115.56	-1.07	174.41	74.9	-7.49	-38.5	77.77	-21.56	-21.6	27.2	-96.8	188.8
20748.2	8249.67	-0.99	-38.61	27.82	110.21	167.99	20.33	-33.17	217.14	-86.24	3.08	140	-28.8	92	24.8
76084.1	45783.5	149.49	3738.24	3012.05	728.67	1585.74	2968.18	1608.21	1925.77	1305.92	6117.65	2891.2	14322.4	7680	5364.8
35243.1	7452.72	19.8	28.71	6.42	126.26	-4.28	-56.71	103.79	40.81	-73.15	-31.57	84	71.2	20	153.6
81927.5	35541	127.71	295.02	167.99	116.63	119.84	135.89	14.98	143.99	158.62	150.15	349.6	219.2	132.8	281.6
13447.6	7990.29	41.58	72.27	44.94	39.59	-33.17	8.56	-103.79	-61.6	-64.68	-154	51.2	112	74.4	159.2
48528.7	12400.7	77.22	78.21	-34.24	115.56	124.12	29.96	16.05	-1.54	-86.24	-37.73	32.8	96	40.8	-51.2
89151	27947.7	87.12	129.69	130.54	131.61	-22.47	147.66	18.19	-16.17	66.99	147.84	344	241.6	47.2	142.4
148870	80703.8	283.14	1910.7	1122.43	407.67	1058.23	543.56	496.48	267.19	397.32	754.6	1991.2	6624.8	3172.8	2922.4
21340.3	5749.92	44.55	0	26.75	99.51	-4.28	-11.77	-111.28	-70.07	-10.78	-46.2	136	150.4	-40.8	160
169022	85492.4	224.73	1098.9	350.96	185.11	692.29	157.29	1546.15	950.18	658.35	6161.54	1067.2	1028	1516	1465.6
24129.1	6237	-42.57	67.32	19.26	48.15	-46.01	-158.36	31.03	-93.17	-100.87	-103.95	94.4	-9.6	13.6	157.6
59299.3	19852.5	92.07	491.04	211.86	112.35	113.42	-103.79	-144.45	151.69	79.31	-86.24	409.6	106.4	82.4	1103.2
47055.3	27905.1	4.95	14.85	32.1	11.77	18.19	-78.11	97.37	106.26	34.65	-60.83	304	184	166.4	236
22208.6	6108.3	-3.96	2.97	-50.29	-54.57	-141.24	-191.53	-302.81	-226.38	-150.15	-188.65	-39.2	-44	44	-71.2
33989.2	13899.6	23.76	1.98	7.49	117.7	-156.22	-48.15	-71.69	98.56	-23.87	-30.03	4	1.6	37.6	-36.8
72620.5	31160.2	90.09	260.37	195.81	25.68	144.45	86.67	-26.75	361.13	123.2	77.77	314.4	269.6	144	778.4
42151.6	12213.6	92.07	63.36	124.12	13.91	53.5	67.41	-36.38	-105.49	-73.92	19.25	229.6	78.4	156.8	118.4
52117.8	18305.1	28.71	1345.41	-35.31	73.83	156.22	1.07	202.23	60.83	416.57	0	849.6	412	92	2676.8
29523.7	9697.05	22.77	64.35	28.89	-14.98	70.62	-72.76	151.94	107.03	103.95	147.84	151.2	90.4	185.6	60.8
39106	13434.3	37.62	-83.16	-38.52	39.59	-44.94	333.84	92.02	-29.26	22.33	84.7	175.2	120.8	167.2	275.2
19349.3	6721.11	26.73	216.81	94.16	0	123.05	47.08	6.42	196.35	-43.89	125.51	47.2	-48	-60	401.6
13429.8	11663.2	78.21	113.85	-49.22	114.49	16.05	36.38	33.17	-127.05	33.88	58.52	360	176	-44	139.2
33266.7	9600.03	31.68	-29.7	-26.75	105.93	13.91	52.43	-29.96	-93.17	166.32	-45.43	6.4	-144	-3.2	-169.6
17551.1	6610.23	6.93	90.09	-34.24	102.72	8.56	50.29	-68.48	-100.87	-75.46	-95.48	-115.2	-12.8	96	-112.8
97541	57674.4	173.25	931.59	242.89	136.96	471.87	288.9	174.41	115.5	182.49	199.43	900	1810.4	1025.6	1015.2
102927	56398.3	284.13	767.25	2972.46	495.41	679.45	2015.88	1898.18	1377.53	422.73	3995.53	563.2	616	1298.4	714.4
251362	221473	729.63	12641.3	3954.72	1371.74	5219.46	9991.66	3155.43	3790.71	2680.37	9549.54	11542.4	42883.2	22767.2	17643.2
16527.2	4733.19	22.77	-59.4	-32.1	72.76	-78.11	-33.17	150.87	53.9	-34.65	-46.2	1.6	108	115.2	-16
46348.2	15430.1	85.14	123.75	139.1	28.89	147.66	82.39	85.6	-90.86	34.65	1.54	192	120	74.4	120
28635.1	13166	39.6	8.91	133.75	102.72	28.89	-51.36	113.42	17.71	-17.71	109.34	127.2	69.6	-13.6	81.6
90866.6	27211.1	104.94	84.15	-101.65	69.55	131.61	-8.56	-13.91	59.29	138.6	113.96	272.8	-53.6	4	55.2
29600.6	7252.74	-15.84	108.9	-28.89	58.85	-51.36	-85.6	-108.07	16.17	16.94	80.08	8	-8	-90.4	202.4
4204.71	25587.5	17.82	52.47	68.48	144.45	132.68	200.09	-111.28	-30.03	-67.76	64.68	-24	-24	-21.6	151.2
126980	105386	504.9	10644.5	793.94	461.17	3190.74	1579.32	738.3	506.66	338.8	363.44	7920.8	41041.6	17510.4	13505.6
68718	47076.5	123.75	1298.88	713.69	131.61	479.36	636.65	94.16	451.99	216.37	545.16	1400	4274.4	2144	1678.4
135447	64246.1	259.38	383.13	43.87	260.01	1090.33	26.75	1882.13	445.83	301.07	3712.94	817.6	932.8	402.4	942.4
49010.7	12462.1	103.95	-6.93	56.71	60.99	112.35	-160.5	-24.61	-131.67	0	-107.03	308	57.6	114.4	96
95823.8	68485.2	245.52	718.74	251.45	340.26	236.47	171.2	103.79	277.97	402.71	580.58	1075.2	560.8	588.8	1083.2
161495	89168.3	218.79	7977.42	225.77	155.15	2745.62	5932.08	2461	1493.03	1315.16	847.77	4766.4	25553.6	13598.4	9844.8
95392.1	29293.1	123.75	248.49	286.76	123.05	32.1	5.35	104.86	-12.32	21.56	-23.87	249.6	201.6	39.2	72
55772.6	77476.4	275.22	648.45	1333.22	588.5	590.64	722.25	185.11	565.95	409.64	837.76	1545.6	766.4	728.8	1072
17585.1	10448.5	8.91	170.28	50.29	94.16	383.06	698.71	126.26	388.08	381.15	196.35	154.4	165.6	477.6	397.6
12835.3	5319.27	21.78	-129.69	8.56	56.71	85.6	21.4	4.28	-117.81	37.73	76.23	-68	-23.2	44	-16
21830.3	6546.87	6.93	-75.24	70.62	117.7	80.25	194.74	87.74	-40.04	77.77	9.24	6.4	16	-20	-182.4
37405.8	13611.5	0	157.41	135.89	-28.89	132.68	34.24	149.8	-22.33	-96.25	-6.93	68	220	-17.6	277.6
17430.4	33987.7	124.74	245.52	75.97	254.66	5.35	-14.98	78.11	-91.63	-0.77	-104.72	90.4	180	56.8	80
17753.6	11608.7	24.75	-67.32	-50.29	6.42	26.75	-261.08	6.42	36.96	2.31	-104.72	180.8	16.8	-77.6	99.2
34534.4	13933.3	25.74	-4.95	1.07	21.4	-69.55	26.75	-41.73	88.55	24.64	6.16	133.6	120	-32.8	260.8
25583.8	11481	14.85	57.42	70.62	32.1	11.77	-26.75	-107	-109.34	-36.19	-126.28	54.4	140.8	-65.6	-50.4
21538.7	3791.7	35.64	55.44	51.36	-24.61	179.76	80.25	107	256.41	137.06	11.55	-64.8	24.8	48.8	-25.6
22744.8	5730.12	39.6	38.61	-37.45	66.34	-33.17	67.41	-33.17	-3.85	53.13	40.04	264.8	161.6	89.6	158.4
Single Cells
Patient 17: Behcets Disease
97349.6	39367.3	139.59	1992.87	1836.65	425.1	1057.3	2284.64	994.08	753.92	311.6	3555.28	1586.4	7364.8	3904	2404
141612	68029.8	130.68	641.52	333.54	135.16	277.95	300.84	445.81	323.76	299.44	223.44	696	384.8	816.8	759.2
31885.6	15068.8	0.99	51.48	83.93	-6.37	46.87	22.89	-135.75	-8.12	66.12	40.28	217.6	147.2	152.8	128
9928	3933.27	20.79	-49.51	-36.94	-6.37	44.69	77.39	138.43	-103.88	-59.96	-65.88	13.6	16.8	-59.2	12
12526.4	2392.83	-13.15	-32.34	113.36	-29.48	69.76	28.34	-101.54	32.68	-41.44	29.64	-95.2	-16.4	38.4	100.8
108441	83928.2	250.47	4131.27	427.28	250.7	1936.93	1031.14	609.31	374.68	404.32	282.72	2750.4	14089.6	6697.6	5395.2
130939	60322.7	198	1402.83	2520.08	608.22	341.17	1220.8	1365.77	651.32	490.2	1988.16	732.8	456.8	1078.4	1132
129656	78147.6	160.38	4882.68	3074.89	596.23	1989.25	3883.67	1495.48	1213.72	351.88	2789.96	3151.2	16354.4	8868.8	5716.8
7821.6	8182.35	22.77	84.15	125.35	-33.12	28.34	-65.51	43.6	104.12	-12.32	37.24	28.8	-12	6.4	-48
84703.2	48304.1	143.55	2129.49	265.96	203.83	1569.6	3554.49	366.24	896.04	480.32	1592.96	1364.8	8070.4	4492	2700
26736.8	7707.15	9.9	66.33	140.61	7.63	93.74	136.25	-84.98	25.08	15.2	-97.2	183.2	36	142.4	-24.4
21767.2	8777.34	83.16	50.49	150.42	-17.47	148.24	21.8	93.74	152	69.92	-5.16	-54.8	40	-0.4	-40.4
6084	7350.75	-18.2	-44.46	-110.82	-50.77	112.27	-100.63	109	-116.2	158.08	-7.64	-97.6	-10.8	47.2	82.4
100216	98558.5	204.93	2181.96	2956.08	795.7	951.57	2898.31	1196.82	955.32	394.44	1638.56	1905.6	6827.2	4373.6	3077.6
197829	57383.4	221.76	3880.8	320.46	198.38	1796.32	2867.79	972.28	896.04	158.08	1881.76	2760.8	14273.6	7011.2	4661.6
97136.8	71038.4	119.79	4351.05	3319.05	945.03	1975.08	3949.07	1217.53	1393.84	469.68	3256.6	3702.4	17434.4	8962.4	5746.4
7002.4	20612.8	31.68	-77.79	58.86	68.67	-53.5	52.32	66.49	15.96	51.68	-141.88	70.4	6.4	-7.2	-11.2
148522	77531.9	265.32	3565.98	343.35	196.2	2468.85	4634.68	1505.29	1365.72	357.96	3422.28	2793.6	14469.6	8379.2	4482.4
156856	64606.4	188.1	3169.98	2922.29	572.25	1329.8	3785.57	1165.21	934.8	329.08	1716.84	2491.2	10425.6	5835.2	3674.4
5389.6	10159.4	11.88	73.26	-3.64	18.53	-22.02	-50.77	-125.56	91.2	136.8	-63.4	4	-104	47.2	-3.2
29426.4	8718.93	49.5	-16.18	130.8	163.5	92.65	-8.19	6.54	57	128.44	-87.08	-16	2.4	4.8	-87.2
17169.6	12600.7	65.34	2.97	99.19	2.18	-67.33	-6.37	43.6	-66.36	-80.68	15.96	39.2	85.6	76.8	54.4
217461	139321	426.69	4242.15	1437.71	845.84	1642.63	904.7	679.07	538.84	389.88	363.28	3714.4	14051.2	6144	5102.4
13055.2	9690.12	23.76	-33.35	9.81	65.4	13.08	94.83	78.48	-57.48	-45.64	-32.56	33.6	-63.2	56	-22.8
145767	143774	469.26	1021.68	2081.9	984.27	764.09	219.09	1227.34	139.84	446.12	642.96	1952.8	1441.6	811.2	1278.4
73458.4	66621.1	181.17	331.65	332.45	293.21	236.53	151.51	499.22	120.08	82.08	60.04	829.6	509.6	273.6	474.4
35105.6	100873	220.77	6936.93	607.13	389.13	2876.51	1601.21	209.28	158.84	464.36	188.48	4852	26417.6	11444	8502.4
34186.4	14423.3	16.83	315.81	34.88	4.36	1973.99	6402.66	804.42	1561.04	124.64	415.72	89.6	642.4	1788.8	374.4
172627	59863.3	193.05	445.5	392.4	280.13	1154.31	312.83	1193.55	579.88	327.56	3557.56	579.2	632	738.4	887.2
175861	133582	345.51	4278.78	1208.81	637.65	1951.1	1074.74	494.86	211.28	300.96	255.36	3615.2	16370.4	7084	5261.6
87923.2	44875.7	57.42	137.61	244.16	180.94	-41.49	-32.21	-176.33	60.8	101.84	103.36	210.4	247.2	116	328
112210	160417	279.18	3007.62	742.29	1027.87	1036.59	1667.7	2438.33	1798.92	5342.04	12515.7	1920	2156.8	3977.6	4544
58594.4	42326.5	83.16	296.01	100.28	232.17	92.65	313.92	368.42	114	225.72	27.36	391.2	212	-19.2	369.6
9968	8659.53	8.91	-16.18	34.88	18.53	-126.47	-138.48	63.22	-34.28	38	-110.28	243.2	9.6	167.2	169.6
33388	10595	60.39	-54.56	6.54	40.33	382.59	979.91	270.32	155.8	-53.28	117.8	-4	202.4	429.6	31.2
151126	67514	99	346.5	204.92	144.97	491.59	611.49	1009.34	783.56	151.24	1471.36	511.2	397.6	719.2	448
124364	129429	290.07	4027.32	1293.83	701.96	2017.59	954.84	232.17	172.52	436.24	170.24	2972.8	14964.8	6807.2	5496
8666.4	3799.62	-7.09	164.34	184.21	62.13	-62.78	-63.69	-40.58	-33.8	12.92	15.2	124	64.8	96.8	-80
14501.6	7520.04	-12.14	-62.64	208.19	-52.59	62.13	-267.86	97.01	1.52	-2.2	-57.48	19.2	72	-81.6	-62.8
157978	52935.3	182.16	607.86	2416.53	455.62	358.61	422.92	912.33	435.48	229.52	1929.64	488	773.6	598.4	671.2
29286.4	12306.7	14.85	193.05	-61.87	-44.22	-32.21	37.06	111.18	-33.04	22.8	26.6	135.2	32	-111.2	-51.2
25009.6	19072.3	76.23	18.81	50.14	29.43	125.35	-57.14	44.69	91.2	19.76	-74.76	182.4	104	63.2	191.2
125083	49590.1	184.14	980.1	213.64	228.9	221.27	466.52	397.85	489.44	490.2	1160.52	504.8	235.2	1580.8	1571.2
148479	94501.4	209.88	3738.24	431.64	325.91	2200.71	2093.89	994.08	612.56	382.28	1621.84	2909.6	14836	6797.6	4738.4
8960.8	4720.32	4.95	149.49	68.67	-39.67	1387.57	3813.91	840.39	1111.88	8.36	151.24	-9.6	504.8	1327.2	121.6
10689.6	3821.4	-17.19	64.35	75.21	-12.92	68.67	-135.75	156.96	62.32	-22.44	75.24	63.2	138.4	-72	-4.4
23873.6	13409.5	58.41	-4.06	166.77	27.25	-3.64	71.94	27.25	-9.36	-53.28	-43.16	80.8	86.4	115.2	-48
77096	78453.5	145.53	6144.93	383.68	203.83	2375.11	1052.94	621.3	250.04	350.36	250.8	4280.8	24024.8	10330.4	7902.4
88881.6	68739.7	162.36	3044.25	213.64	327	2333.69	4156.17	889.44	1499.48	355.68	1570.16	2284	11407.2	6394.4	3764.8
124676	46910.2	123.75	1835.46	1686.23	463.25	885.08	2731.54	1111.8	786.6	299.44	1926.6	1629.6	6829.6	3896.8	2478.4
136659	73079.8	254.43	1222.65	2548.42	740.11	682.34	337.9	825.13	380.76	347.32	2630.36	1400	4233.6	2119.2	1724.8
151168	130552	320.76	4816.35	1128.15	639.83	2006.69	817.5	494.86	342	172.52	135.28	4696	18591.2	7960	6456
132324	121098	280.17	353.43	1661.16	754.28	527.56	226.72	592.96	220.4	168.72	145.92	1236	718.4	252	676
88153.6	56025.1	97.02	1191.96	1854.09	469.79	611.49	3363.74	730.3	1174.96	372.4	2613.64	934.4	2835.2	2446.4	1269.6
65750.4	33770.9	78.21	292.05	222.36	165.68	138.43	-80.25	325.91	-49.84	416.48	113.24	546.4	340.8	49.6	670.4
24577.6	13378.9	62.37	80.19	30.52	3.27	130.8	-65.51	120.99	30.4	61.56	173.28	32	36.8	-25.6	125.6
130817	54196.6	139.59	3522.42	2327.15	654	1394.11	1989.25	635.47	860.32	202.92	2029.96	2520.8	12934.4	6821.6	4272
24181.6	11813.7	31.68	-39.41	184.21	-6.37	-60.96	42.51	19.62	-87.08	2.28	-10.6	166.4	-60	-10.8	54.4
20187.2	12270.1	15.84	198.99	10.9	-36.94	19.62	18.53	173.31	158.84	36.48	51.68	2.4	-88	50.4	8
10556	7677.45	11.88	88.11	-37.85	45.78	-5.46	-4.55	-26.75	35.72	-32.56	72.2	-172	-89.6	-58.8	58.4
22797.6	9760.41	99.99	151.47	114.45	5.45	51.23	67.58	8.72	-8.88	-60.44	58.52	31.2	102.4	12.8	180
145093	81820.5	234.63	538.56	262.69	172.22	260.51	295.39	306.29	71.44	215.84	38.76	588	373.6	200	956.8
48824.8	22077	126.72	91.08	81.75	101.37	118.81	-185.61	-26.75	-33.8	28.88	176.32	204.8	-36	155.2	134.4
15036.8	10529.6	27.72	130.68	17.44	13.08	-27.66	143.88	-179.06	68.4	-71.8	44.84	36	-56	69.6	23.2
9959.2	35973.6	14.85	6.93	35.97	71.94	38.15	80.66	19.62	-92.52	-14.04	-52.8	-101.6	24.8	38.4	64
14784	7501.23	37.62	54.45	9.81	55.59	-49.86	-13.83	9.81	-61.68	52.44	118.56	-4	76.8	-28	12.8
113562	53567.9	85.14	2551.23	234.35	138.43	547.18	437.09	864.37	122.36	661.96	291.84	1027.2	5244.8	2479.2	2620
87131.2	87805.1	131.67	2182.95	228.9	184.21	1480.22	2937.55	609.31	1112.64	699.96	2555.12	2241.6	8001.6	4547.2	2940.8
82133.6	92673.9	178.2	4388.67	2864.52	778.26	1869.35	6762.36	1646.99	1735.08	593.56	2474.56	3274.4	14288.8	9729.6	5922.4
154903	83934.2	209.88	3047.22	3026.93	742.29	1425.72	1817.03	1036.59	748.6	305.52	2998.2	2238.4	10788	5468	3903.2
39628.8	9522.81	3.96	-44.46	50.14	20.71	27.25	-44.22	105.73	-120.4	29.64	173.28	169.6	38.4	-54.8	-47.2
76125.6	112799	224.73	468.27	246.34	318.28	912.33	904.7	807.69	510.72	216.6	2938.92	1045.6	638.4	726.4	581.6
27809.6	11856.2	18.81	22.77	-9.1	58.86	10.9	-60.96	124.26	-35.52	-9.36	9.12	120.8	24.8	59.2	58.4
144649	57389.3	145.53	1372.14	2120.05	586.42	657.27	3228.58	933.04	1051.08	338.2	1493.4	1172.8	4884	3084.8	1909.6
10937.6	5016.33	24.75	24.75	141.7	114.45	65.4	-58.05	52.32	-108.56	98.8	61.56	-160.4	-128	14.4	-121.6
120892	79506.9	169.29	2964.06	357.52	219.09	1698.22	3190.43	1245.87	1127.08	709.08	2450.24	2180	10304.8	5574.4	3635.2
147968	48049.7	189.09	1526.58	1814.85	552.63	951.57	3533.78	1438.8	987.24	437	2319.52	1470.4	4713.6	3248	1864.8
31668	9494.1	11.88	-20.22	-57.14	10.9	41.42	10.9	-1.82	-115.72	-15.28	0.76	87.2	21.6	13.6	28
136208	58668.4	224.73	2693.79	1920.58	505.76	1055.12	4319.67	1689.5	1741.92	402.8	3078.76	2004.8	6420	5063.2	3508.8
7157.6	9003.06	-35.37	49.5	50.14	-81.16	38.15	-57.14	-61.87	-53.28	-5.92	21.28	19.2	24	-60	-86.8
17162.4	10252.4	84.15	-81.83	-38.76	-0.91	42.51	103.55	134.07	310.08	72.96	89.68	-14.8	7.2	-55.2	122.4
11116	6423.12	-10.12	8.91	122.08	14.17	10.9	-36.94	-39.67	-53.28	-33.04	-55.76	120.8	40.8	136.8	-33.6
129654	116672	176.22	2687.85	867.64	708.5	1763.62	478.51	596.23	291.08	298.68	98.04	2440.8	11086.4	5061.6	3752.8
55328.8	104487	193.05	487.08	385.86	212.55	1342.88	1675.33	837.12	510.72	176.32	1790.56	787.2	612.8	880.8	744
133366	70281.1	78.21	420.75	322.64	192.93	1239.33	44.69	848.02	222.68	44.84	1823.24	669.6	790.4	292.8	504.8
13284	7344.81	11.88	37.62	-98.81	238.71	-75.7	-52.59	-113.55	-37.24	78.28	-61.68	240	44.8	-25.6	101.6
165714	97011.1	132.66	4296.6	2505.91	671.44	1770.16	710.68	902.52	214.32	225.72	1402.96	2911.2	15496	6770.4	5052
136334	76108.2	159.39	3001.68	433.82	137.34	1930.39	4072.24	1147.77	1072.36	437.76	2028.44	2728.8	10385.6	6211.2	3591.2
51229.6	198158	173.25	1982.97	1067.11	2036.12	1297.1	981	879.63	690.08	5377.76	3104.6	1296.8	1112	1064.8	2482.4
12407.2	5539.05	-29.31	121.77	111.18	107.91	-10.01	4.36	-100.63	69.92	11.4	-20.72	-4	22.4	-90.8	4
96732	94453.9	294.03	4193.64	1516.19	610.4	1938.02	863.28	562.44	76	277.4	164.92	4841.6	15812.8	7076.8	5476
15174.4	22234.4	39.6	102.96	10.9	39.24	129.71	-100.63	165.68	-60.44	19	75.24	241.6	32.8	13.6	324.8
21180.8	9148.59	-2.04	42.57	81.75	61.04	-43.31	-82.07	70.85	-62.16	-45.64	19.76	50.4	53.6	16	33.6
5256	11186	-29.31	-46.48	-60.96	-6.37	11.99	-157.95	-67.33	79.8	-35.52	-14.04	205.6	132	55.2	68.8
106940	46606.2	151.47	2967.03	1824.66	461.07	1199	3968.69	1023.51	1576.24	808.64	2736	2101.6	8228	5993.6	4000
163653	88272.4	198.99	1275.12	3692.92	988.63	325.91	530.83	1297.1	253.08	385.32	2275.44	1020.8	1054.4	974.4	1223.2
81868	144042	396.99	2391.84	1496.57	598.41	1111.8	113.36	425.1	341.24	230.28	387.6	3164	7793.6	3540	3506.4
163805	81001.8	185.13	6896.34	499.22	309.56	4122.38	4112.57	1890.06	1375.6	391.4	2526.24	4798.4	28516.8	13116.8	8283.2
30072.8	106502	157.41	1573.11	297.57	368.42	688.88	1085.64	563.53	408.88	505.4	212.8	1134.4	3860	2000.8	1648
9246.4	9485.19	34.65	97.02	-130.11	85.02	-8.19	56.68	7.63	-87.84	-72.28	-93.76	85.6	-34.8	-51.2	-19.2
Single Cells
Patient 18: Behcets Disease
109202	81379	137.61	2581.92	2952.81	638.74	698.69	5077.22	1498.75	1748.76	468.16	3212.52	960	4026.4	3742.4	2518.4
66936	99629.6	202.95	329.67	325.91	300.84	1505.29	1771.25	1108.53	994.84	149.72	3293.08	332	829.6	1137.6	760
143216	54528.2	218.79	1000.89	2643.25	879.63	359.7	2733.72	1682.96	1054.12	571.52	3124.36	387.2	221.6	1010.4	1012.8
53951.2	89170.3	159.39	470.25	304.11	347.71	262.69	153.69	421.83	227.24	348.08	133.76	268	168	808.8	911.2
17159.2	7040.88	8.91	103.95	89.38	-17.47	-39.67	-116.28	-40.58	6.08	3.04	63.08	11.2	-57.6	-70.8	-94.8
138204	65079.6	190.08	2787.84	2631.26	838.21	1334.16	5707.24	1092.18	1526.84	508.44	2729.92	1654.4	9239.2	5619.2	3096.8
7696.8	13998.6	44.55	62.37	119.9	44.69	9.81	-16.56	35.97	-78.96	28.12	-11.08	163.2	52.8	-36	333.6
10480.8	5662.8	-3.05	13.86	-36.94	-50.77	-15.65	-100.63	-84.98	122.36	158.84	-39.72	24.8	8.8	-102.8	-70.8
116607	82844.2	322.74	785.07	238.71	401.12	424.01	124.26	570.07	47.88	262.96	142.88	643.2	1060.8	408	1289.6
89940.8	134413	230.67	5660.82	1015.88	603.86	2558.23	1016.97	384.77	199.88	253.84	169.48	4472	22833.6	10526.4	7520.8
111664	76774.5	132.66	2975.94	315.01	328.09	1738.55	3570.84	327	925.68	295.64	2107.48	2072	10946.4	5638.4	3572.8
23567.2	16965.6	15.84	92.07	94.83	31.61	143.88	50.14	-28.57	81.32	98.8	64.6	51.2	-54.8	18.4	95.2
240847	113748	218.79	1048.41	1571.78	598.41	679.07	558.08	537.37	330.6	240.92	247.76	1046.4	2459.2	1277.6	1601.6
10988	9292.14	10.89	82.17	112.27	34.88	942.85	3166.45	548.27	883.12	82.08	228.76	-8.4	152	1061.6	-8.4
134510	65756.8	162.36	2536.38	3264.55	668.17	795.7	2715.19	1122.7	1352.8	804.08	2859.12	720	2370.4	2990.4	2234.4
147791	81007.7	181.17	726.66	318.28	174.4	983.18	474.15	1469.32	620.92	302.48	3427.6	726.4	942.4	1436	993.6
146284	56618.1	197.01	2746.26	221.27	378.23	1466.05	2122.23	887.26	782.8	405.08	1987.4	1799.2	9967.2	5030.4	3164
211093	153520	292.05	2315.61	1246.96	752.1	1165.21	644.19	357.52	111.72	500.84	320.72	2120	9117.6	4178.4	3392.8
46759.2	18215	13.86	105.93	153.69	144.97	33.79	16.35	-48.95	-37.24	61.56	-35.52	30.4	76.8	55.2	-48
6958.4	11173.1	73.26	30.69	1.09	53.41	-9.1	119.9	18.53	132.24	-26.64	195.32	88	36	47.2	128
15399.2	9608.94	-3.05	-31.33	104.64	106.82	0	-154.13	-158.86	-52.8	-43.16	-14.8	6.4	18.4	51.2	46.4
17064	7616.07	33.66	-85.87	-20.2	-42.4	79.57	161.32	44.69	-80.68	-92.52	47.88	150.4	-63.2	76	85.6
72459.2	84154	174.24	1118.7	1910.77	4823.25	2488.47	1782.15	1146.68	805.6	3128.16	5591.32	627.2	986.4	1038.4	1717.6
5196	5498.46	13.86	130.68	128.62	102.46	-48.95	-60.96	18.53	-38	1.52	-97.2	89.6	-8.4	8	-0.4
139723	66685.4	185.13	71.28	142.79	231.08	831.67	329.18	1152.13	402.04	373.16	2773.24	396	360.8	273.6	231.2
105130	40425.7	182.16	2599.74	248.52	183.12	1942.38	1957.64	644.19	604.96	611.8	1855.16	2260	10986.4	5473.6	3594.4
78299.2	100051	239.58	1284.03	810.96	1894.42	909.06	467.61	355.34	338.2	3062.8	2017.8	688	664.8	922.4	1735.2
155574	110871	248.49	2247.3	2980.06	894.89	486.14	926.5	1265.49	519.84	691.6	1441.72	550.4	338.4	918.4	1936
38811.2	14447.1	-31.33	104.94	26.16	70.85	-1.82	29.43	7.63	-30.84	80.56	149.72	1.6	125.6	62.4	44.8
248686	115107	289.08	5858.82	465.43	535.19	2281.37	813.14	458.89	259.92	387.6	180.12	4000.8	22580	9897.6	7322.4
134020	64688.6	146.52	1575.09	2429.61	794.61	791.34	1343.97	861.1	788.88	395.96	2517.12	936.8	4767.2	2800	1803.2
57021.6	90459.3	197.01	1578.06	2233.41	607.13	609.31	3284.17	864.37	1285.92	323	2332.44	990.4	3629.6	2963.2	2098.4
8815.2	29408.9	50.49	405.9	276.86	99.19	135.16	-26.75	-79.34	-144.08	179.36	185.44	389.6	322.4	224	664
9813.6	6227.1	45.54	185.13	-9.1	47.96	-88.62	-161.59	-43.31	-122.12	-65.88	-2.96	-86.8	0.8	-16.4	-91.2
120641	76574.5	91.08	2407.68	2606.19	579.88	1137.96	2481.93	1080.19	1188.64	547.2	4030.28	1900	9344	4936.8	3000
16239.2	13867.9	25.74	-1.03	68.67	-31.3	-54.41	-86.8	-32.21	69.16	10.64	-7.64	184.8	55.2	-84	-24.4
7833.6	12829.4	13.86	89.1	52.32	81.75	125.35	33.79	-78.43	-59.2	127.68	33.44	150.4	146.4	56	169.6
142745	77283.4	186.12	2999.7	2324.97	599.5	1517.28	3077.07	713.95	1140.76	924.92	3505.12	2228	11773.6	6204.8	3949.6
16841.6	9836.64	13.86	149.49	170.04	51.23	32.7	-209.63	-80.25	-97.2	-2.2	-30.08	140	-12.4	-71.2	7.2
42581.6	31588.9	81.18	112.86	249.61	172.22	53.41	180.94	124.26	3.04	74.48	17.48	100	10.4	-86.8	209.6
84800	51805.7	196.02	3701.61	135.16	261.6	1837.74	1939.11	757.55	537.32	271.32	1676.56	2400	14963.2	6684	4913.6
9153.6	15129.2	14.85	129.69	-82.07	136.25	119.9	8.72	-40.58	124.64	66.12	22.8	132	-58.8	163.2	56.8
121560	146600	403.92	4974.75	1284.02	604.95	2272.65	1140.14	545	173.28	422.56	305.52	4742.4	19373.6	8572	6958.4
7988.8	6762.69	-26.28	32.67	-82.07	150.42	166.77	18.53	67.58	-74.76	76.76	79.8	40.8	-51.2	-35.2	100
127139	57482.4	131.67	1241.46	186.39	150.42	652.91	3709.27	1794.14	1516.96	323	7660.8	1132	4736.8	3709.6	1844
177609	94744	225.72	579.15	303.02	213.64	386.95	226.72	183.12	90.44	224.96	251.56	373.6	273.6	416.8	792.8
8931.2	7832.88	-25.27	105.93	-73.88	-16.56	-16.56	-38.76	-36.94	139.08	72.2	-44.4	80	42.4	-8.4	4
28457.6	19432.7	46.53	11.88	18.53	87.2	120.99	42.51	-30.39	-51.56	83.6	6.84	108	94.4	-55.2	185.6
10277.6	9039.69	-14.16	112.86	-149.58	35.97	34.88	114.45	-118.1	-69.32	41.04	46.36	114.4	14.4	-75.2	32.8
16268.8	8162.55	48.51	17.82	-56.23	-43.31	112.27	-44.22	79.57	-43.16	52.44	-69.32	109.6	93.6	-22.8	114.4
6420	5905.35	10.89	67.32	-109.91	37.06	4.36	99.19	90.47	-159.64	12.92	-87.08	14.4	-5.6	48	121.6
247138	161756	400.95	5487.57	2692.3	821.86	2339.14	4270.62	1964.18	1643.88	1182.56	3761.24	4412.8	18574.4	9785.6	6856
13017.6	7865.55	-24.26	89.1	21.8	-8.19	44.69	346.62	191.84	13.68	11.4	-2.96	-62.8	-26.8	204	24
39947.2	18805	-3.05	59.4	-121.92	113.36	-57.14	-6.37	-74.79	62.32	-61.68	-51.56	-20	41.6	-62.8	231.2
24425.6	12027.5	44.55	14.85	141.7	-39.67	83.93	58.86	71.94	51.68	105.64	-76	130.4	121.6	-36	-37.6
22319.2	12455.2	27.72	101.97	69.76	186.39	-36.94	-37.85	69.76	10.64	43.32	46.36	20	-42.8	16.8	-90.8
12004	5460.84	0	26.73	-90.44	16.35	204.92	-175.42	33.79	-78.2	106.4	13.68	138.4	57.6	78.4	-4
101560	56630	107.91	2750.22	2059.01	577.7	991.9	2326.06	331.36	821.56	377.72	3229.24	1823.2	10377.6	5426.4	3545.6
12420	9873.27	9.9	74.25	69.76	195.11	175.49	239.8	97.01	-8.12	18.24	259.16	92.8	55.2	208.8	10.4
160522	70830.5	260.37	453.42	1177.2	459.98	1250.23	-6.37	1389.75	212.04	357.96	3182.88	1436	1060.8	452.8	865.6
152891	61334.5	200.97	1984.95	2706.47	709.59	1352.69	2439.42	1488.94	760	723.52	3486.88	1658.4	7608	4192	2914.4
165408	68893.1	168.3	2392.83	232.17	280.13	1737.46	1424.63	814.23	500.08	259.16	1957.76	1516.8	8556	4263.2	2785.6
130077	80146.4	248.49	588.06	267.05	249.61	1571.78	2009.96	1067.11	867.16	373.92	1924.32	416	1905.6	1449.6	737.6
53868	44609.4	90.09	258.39	229.99	216.91	56.68	132.98	100.28	94.24	142.88	86.64	336.8	67.2	-13.6	408
22240	11879	26.73	146.52	-4.55	149.33	68.67	-38.76	-52.59	0.76	-90.04	119.32	36.8	32	126.4	69.6
8880	8853.57	50.49	136.62	52.32	23.98	14.17	-77.52	-109.91	40.28	37.24	-78.2	136	72.8	53.6	-0.4
60799.2	24506.5	26.73	235.62	279.04	3.27	163.5	21.8	10.9	-1.72	69.16	72.2	555.2	328	217.6	101.6
10104	30002.9	47.52	41.58	2.18	165.68	83.93	237.62	89.38	0.76	115.52	11.4	208.8	145.6	2.4	205.6
109613	55611.3	159.39	1198.89	2532.07	630.02	795.7	2028.49	963.56	1057.16	509.2	4762.16	1059.2	4848.8	2860	1644
118741	83571.8	198.99	726.66	434.91	488.32	1187.01	2358.76	368.42	719.72	221.92	66.88	553.6	596	780.8	637.6
6105.6	6898.32	21.78	-65.67	187.48	97.01	91.56	-79.34	141.7	-66.36	-56.24	40.28	71.2	-33.6	202.4	20
8772	4037.22	38.61	-62.64	-57.14	191.84	-36.94	122.08	144.97	64.6	127.68	12.16	2.4	35.2	-55.2	-108
9678.4	5576.67	0.99	25.74	62.13	65.4	15.26	71.94	142.79	11.4	-2.96	9.12	-16.4	-9.6	78.4	87.2
42156.8	13550.1	21.78	-84.86	111.18	79.57	0	116.63	-153.22	-47.36	-92.52	29.64	144	29.6	-31.2	-91.2
40819.2	26930	74.25	-59.61	90.47	110.09	83.93	64.31	-158.86	41.8	19.76	46.36	65.6	13.6	-17.6	248
93396.8	71677	183.15	3306.6	2117.87	545	1496.57	3236.21	1117.25	1425	454.48	3907.92	2296.8	12565.6	6757.6	4059.2
123899	87932.8	168.3	4250.07	2184.36	711.77	2021.95	4592.17	1715.66	1495.68	531.24	3971.76	2630.4	14612.8	7804.8	4911.2
28507.2	14820.3	29.7	-124.27	179.85	115.54	-54.41	-10.01	76.3	76.76	-19.48	40.28	93.6	146.4	-84	-7.2
24544.8	14828.2	33.66	-3.05	171.13	110.09	-91.35	23.98	16.35	38	72.96	22.04	180	-2.8	76	56.8
28486.4	58373.4	187.11	449.46	370.6	365.15	208.19	277.95	152.6	98.8	241.68	67.64	1338.4	593.6	282.4	707.2
116512	80767.2	210.87	3229.38	2421.98	711.77	989.72	5125.18	1632.82	2145.48	734.92	1637.04	1430.4	5938.4	6852.8	4355.2
142074	69653.4	221.76	272.25	308.47	213.64	825.13	765.18	891.62	354.92	151.24	1105.04	415.2	446.4	258.4	354.4
14144	7474.5	5.94	121.77	69.76	77.39	-31.3	343.35	107.91	49.4	125.4	35.72	-18.8	35.2	45.6	132.8
6424	13066	41.58	10.89	-63.69	23.98	61.04	-82.07	38.15	33.44	7.6	-88.32	167.2	148	149.6	89.6
31380.8	17542.8	11.88	113.85	-16.56	-7.28	115.54	249.61	99.19	-68.08	22.8	-45.64	81.6	43.2	99.2	70.4
20732.8	22728.4	39.6	230.67	192.93	136.25	-39.67	80.66	-245.66	101.84	28.88	-26.64	256	94.4	-63.2	72.8
126587	86752.7	163.35	2334.42	2275.92	566.8	898.16	3460.75	614.76	1093.64	732.64	1670.48	901.6	4285.6	3914.4	2997.6
14508.8	6832.98	59.4	-14.16	94.83	142.79	59.95	160.23	66.49	67.64	123.88	20.52	24	47.2	100	120
251925	163872	320.76	1346.4	1630.64	556.99	915.6	329.18	612.58	174.8	337.44	285.76	1360	3281.6	1614.4	1718.4
19825.6	14086.7	128.7	86.13	9.81	42.51	138.43	0	117.72	30.4	18.24	-57	135.2	84.8	34.4	93.6
94554.4	182823	284.13	1615.68	880.72	522.11	909.06	466.52	384.77	122.36	247.76	148.96	1364.8	3823.2	1903.2	1712
9740	12613.6	30.69	122.76	47.96	-36.94	90.47	110.09	-182.88	-193.44	123.12	-46.12	-74.8	76	-84	192.8
25342.4	7628.94	35.64	-6.08	-21.11	-7.28	16.35	42.51	74.12	23.56	33.44	84.36	-68.4	1.6	-119.2	71.2
39232.8	21800.8	72.27	230.67	118.81	1.09	119.9	3.27	-61.87	285.76	43.32	37.24	270.4	108	119.2	402.4
101172	73766.9	236.61	3217.5	124.26	352.07	2227.96	3085.79	679.07	797.24	497.04	1521.52	2132.8	12877.6	6934.4	4138.4
8444.8	6375.6	12.87	23.76	103.55	83.93	4.36	-2.73	76.3	32.68	0	-70.56	209.6	64.8	64.8	-144.4
17096.8	8788.23	35.64	143.55	9.81	47.96	59.95	100.28	119.9	-21.2	-11.84	-57	-67.2	-70.8	-15.2	132.8
94957.6	66872.5	106.92	3066.03	2188.72	582.06	280.13	821.86	1850.82	888.44	1209.16	3027.08	496	492.8	1857.6	3134.4
16614.4	15452.9	65.34	-106.09	123.17	-65.51	-27.66	-43.31	-39.67	92.72	-4.68	99.56	46.4	-20.4	-13.6	33.6
20164.8	8783.28	-1.03	170.28	-4.55	101.37	129.71	-13.83	-49.86	-161.36	-43.92	42.56	-72.4	20	-24	212
Single Cells
Patient 19: Behcets Disease
130496	157146	197.88	1790.1	1157.52	422.94	804.54	444.14	411.28	176.96	96.38	520.61	2811.78	6530.48	3290.66	2572.34
164001	187365	211.14	1721.76	2127.42	728.22	934.92	334.96	1071.66	356.29	584.6	355.5	3223.42	6640.36	2619.9	2768.32
181919	164966	493.68	3089.58	426.12	424	768.5	222.6	742	767.09	1820.16	899.02	4130.34	6186.9	2723.22	5938.44
98172.9	166137	307.02	1923.72	746.24	387.96	928.56	417.64	694.3	-59.96	285.98	477.16	3006.12	6657.58	3015.96	3065.16
210031	164343	523.26	2518.38	443.08	409.16	776.98	63.6	639.18	653.33	2229.38	811.33	3891.72	3827.76	1407.94	5244.72
123595	139030	494.7	2395.98	379.48	422.94	634.94	612.68	646.6	387.1	2253.87	1082.3	3437.44	3157	1589.98	4495.24
184589	143303	389.64	1821.72	322.24	380.54	436.72	66.78	617.98	592.5	1653.47	1041.22	2942.98	1785.14	892.16	3401.36
106167	56930.3	78.54	1284.18	2786.74	554.38	789.7	1764.9	984.74	983.55	554.58	4313.4	1689.2	5313.6	3242.28	2046.72
215763	195536	311.1	3087.54	2010.82	601.02	1166	558.62	1178.72	135.09	537.2	290.72	3847.44	10198.3	4856.86	3832.68
120988	158586	169.32	1440.24	2644.7	644.48	924.32	374.18	1239.14	374.46	383.94	442.4	3384.14	3611.28	1471.9	2074.6
104698	57072.1	137.7	1883.94	3120.64	698.54	895.7	2801.58	878.74	1037.27	1064.13	5591.62	1720.36	7540.72	4371.42	2515.76
83830.2	71552	106.08	425.34	149.46	89.04	266.06	147.34	65.72	359.45	48.19	38.71	1074.2	1396.46	557.6	817.54
46582.6	200912	575.28	4081.02	584.06	511.98	1333.48	747.3	1161.76	691.25	2283.89	1021.47	4920	8268.88	4028.66	7613.7
219587	165595	878.22	4633.86	383.72	522.58	1336.66	705.96	1019.72	1182.63	4250.2	1847.02	5036.44	8272.16	3842.52	8656.74
113034	124629	181.56	937.38	3158.8	875.56	737.76	1344.08	930.68	514.29	1576.84	3244.53	1405.48	794.58	742.92	1145.54
140760	222953	637.5	5973.12	530	451.56	2023.54	823.62	965.66	822.39	2727.87	1419.63	7242.24	16864.1	7473.48	9321.76
142090	195843	757.86	3422.1	612.68	473.82	926.44	508.8	1502.02	994.61	4055.86	1852.55	5255.38	5067.6	2651.88	7193.86
111921	72294.5	215.22	882.3	190.8	310.58	415.52	431.42	292.56	210.93	82.16	477.16	1112.74	2282.06	1237.38	1314.46
261413	180833	438.6	1960.44	5625.42	17896	7788.88	2032.02	2302.32	748.13	18975	8646.55	2245.98	1453.86	1216.88	5348.86
130938	216492	681.36	3784.2	400.68	652.96	972.02	462.16	806.66	955.11	2870.07	1058.6	5152.06	4978.22	2373.9	6718.26
207145	195667	1033.26	6834	508.8	607.38	1728.86	647.66	1439.48	1224.5	4520.38	1993.96	7867.08	12823.2	6188.54	11293.9
68005.1	173752	526.32	2681.58	364.64	467.46	630.7	380.54	687.94	705.47	2686	1069.66	4706.8	2329.62	1517	5689.16
95174.9	70506.5	104.04	1037.34	2174.06	455.8	658.26	4252.72	1595.3	1830.43	609.09	2825.83	1213.6	3675.24	3373.48	1363.66
112602	86351.2	143.82	1722.78	199.28	302.1	1005.94	3713.18	915.84	1775.92	2056.37	3786.47	2315.68	6432.9	4552.64	2713.38
118706	86283.8	147.9	565.08	5230.04	1106.64	751.54	4642.8	1526.4	1557.88	618.57	1987.64	1157.02	537.1	1983.58	870.84
91878.5	183962	508.98	4201.38	283.02	269.24	1144.8	625.4	810.9	958.27	2584.88	1489.94	5162.72	8884.7	4082.78	7179.1
86687.1	75423.9	119.34	1621.8	3045.38	708.08	924.32	3965.46	943.4	1528.65	970.12	3417.54	1587.52	5416.92	3903.2	2031.96
210976	200628	694.62	3627.12	608.44	534.24	935.98	772.74	1062.12	1121.8	3166.32	1416.47	5248.82	4110.66	2022.12	7127.44
132198	198896	666.06	3192.6	293.62	501.38	823.62	387.96	1016.54	827.92	3306.15	1459.13	3955.68	3860.56	1547.34	6207.4
124682	129535	246.84	791.52	204.58	371	437.78	444.14	421.88	255.96	1107.58	535.62	1867.14	1843.36	1118.48	1375.14
134514	183039	230.52	910.86	1436.3	760.02	545.9	371	1897.4	183.28	464.52	1001.72	3170.94	1640	710.12	1285.76
73494.1	166015	566.1	3279.3	288.32	284.08	907.36	296.8	700.66	857.94	2863.75	1224.5	3817.1	5068.42	2479.68	6332.04
76534.7	182541	196.86	7481.7	956.12	412.34	2729.5	1157.52	1060	375.25	560.9	492.17	6632.16	29243.7	12360.7	9576.78
118155	103408	135.66	2586.72	3540.4	764.26	1001.7	3924.12	1579.4	1771.97	532.46	4731.31	2678.12	9124.96	5503.02	2684.68
131425	236983	826.2	4452.3	557.56	620.1	1162.82	503.5	1026.08	1022.26	3574.75	1616.34	6074.56	7995.82	3525.18	7918.74
185026	191390	819.06	3803.58	500.32	551.2	807.72	443.08	1204.16	961.43	3799.11	1824.11	4991.34	4286.96	2098.38	7334.08
33057.5	158405	323.34	2148.12	420.82	267.12	663.56	292.56	721.86	455.04	1653.47	538.78	3825.3	3098.78	1721.18	4362.4
212711	180481	490.62	2835.6	586.18	413.4	778.04	337.08	922.2	480.32	1868.35	1391.98	3949.94	4774.86	2091.82	4897.04
152322	171308	860.88	4267.68	411.28	521.52	1098.16	520.46	735.64	972.49	3910.5	1712.72	5456.28	6191	3020.06	7873.64
124999	53854	97.92	1877.82	163.24	147.34	1606.96	2728.44	802.42	1382.5	556.16	2550.12	2252.54	7196.32	4320.58	2605.14
72450.3	167576	550.8	2873.34	929.62	375.24	581.94	275.6	1035.62	664.39	2699.43	1696.13	4112.3	2941.34	1312.82	5142.22
76215.7	77043.7	180.54	2025.72	150.52	291.5	1314.4	2498.42	905.24	1226.87	902.97	2696.27	2056.56	7382.46	4409.96	2891.32
148976	197446	971.04	4345.2	501.38	785.46	1085.44	305.28	1143.74	873.74	3605.56	1651.89	5967.14	6526.38	2988.08	8159
153090	170969	218.28	1390.26	2095.62	719.74	689	575.58	710.2	86.9	290.72	1021.47	2495.26	3963.88	1872.06	2256.64
40991	101225	597.72	2875.38	1123.6	2059.58	1489.3	915.84	1017.6	1170.78	5500.77	3016.22	2735.52	2525.6	2208.26	6077.02
161566	208608	880.26	4817.46	588.3	479.12	2291.72	2664.84	1344.08	1726.94	4138.02	2251.5	5914.66	6958.52	3762.16	8851.08
58364.3	168649	580.38	3100.8	465.34	448.38	927.5	266.06	800.3	735.49	2761.05	1236.35	4549.36	5468.58	2504.28	5927.78
37807.7	216697	798.66	5782.38	682.64	569.22	1813.66	836.34	1233.84	970.12	3532.88	1634.51	7657.16	15350.4	6528.84	10382.8
142438	170190	230.52	1310.7	2128.48	604.2	742	733.52	1018.66	312.84	503.23	501.65	2852.78	3464.5	1682.64	2060.66
109165	197926	630.36	4270.74	455.8	517.28	1140.56	467.46	816.2	1019.1	2697.85	1369.07	5459.56	8928.98	4223.82	7913
98002.3	104233	194.82	3054.9	4622.66	850.12	1563.5	4666.12	1432.06	2258.61	1207.91	6373.72	2941.34	10648.5	6593.62	4264
101785	191733	977.16	4986.78	560.74	599.96	1429.94	668.86	970.96	1548.4	3757.24	1700.87	6436.18	9846.56	4305	9440.66
104402	63256.3	105.06	1891.08	3808.58	695.36	1017.6	2948.92	1701.3	1489.94	706.26	4511.69	1993.42	7684.22	4480.48	2628.1
183973	189255	707.88	5924.16	422.94	362.52	1825.32	637.06	687.94	884.01	3476.79	1413.31	5912.2	14876.4	6998.7	9411.96
127493	136838	358.02	2089.98	356.16	376.3	549.08	378.42	783.34	563.27	1914.17	819.23	2939.7	1662.14	819.18	3056.14
110872	190796	585.48	2499	656.14	449.44	977.32	390.08	927.5	729.17	3047.82	1412.52	3885.98	3210.3	1481.74	5276.7
144646	212205	613.02	4519.62	424	500.32	1248.68	528.94	747.3	1027	3002	1267.95	5350.5	10717.4	4756	7682.58
29797.2	32250.4	94.86	173.4	125.08	134.62	-64.28	111.3	136.74	18.17	42.66	123.24	548.58	266.5	8.2	37.72
83003.7	208635	581.4	3916.8	467.46	500.32	1205.22	533.18	589.36	988.29	2740.51	1132.07	4743.7	6646.92	3170.94	7073.32
75772.1	146834	212.16	1486.14	2386.06	780.16	870.26	620.1	922.2	184.86	438.45	449.51	1539.14	3794.96	1533.4	2276.32
29593	133868	-23.52	173.4	74.2	74.2	1.06	-41.6	-58.64	29.23	127.19	11.85	2.46	151.7	24.6	213.2
95186.4	62091.5	53.04	722.16	2510.08	606.32	509.86	3050.68	2018.24	1339.84	410.01	5342.77	1476	1555.54	2109.86	920.86
107315	164183	724.2	2794.8	560.74	542.72	846.94	752.6	1247.62	756.82	3205.03	1611.6	4315.66	4919.18	2368.98	6681.36
162422	191470	649.74	3258.9	305.28	360.4	970.96	339.2	1086.5	981.18	2808.45	1298.76	4813.4	4678.1	2252.54	6058.98
71998.5	61607	107.1	1040.4	134.62	191.86	664.62	3117.46	590.42	1412.52	355.5	1493.89	1633.44	3316.08	2613.34	1686.74
129898	198110	257.04	2604.06	2513.26	771.68	1174.48	470.64	1394.96	194.34	866.63	795.53	4420.62	7312.76	3516.98	3575.2
190203	197328	622.2	3883.14	324.36	372.06	1186.14	444.14	1142.68	834.24	3456.25	1511.27	4842.92	6557.54	3223.42	7612.06
135544	118616	160.14	1560.6	219.42	206.7	288.32	450.5	725.04	1380.92	650.96	399.74	1121.76	420.66	3415.3	2802.76
54293.8	167288	628.32	4947	452.62	552.26	1381.18	732.46	934.92	959.06	3752.5	1389.61	5878.58	11003.6	5440.7	9169.24
60135.5	115776	125.46	1152.6	257.58	332.84	472.76	-79.44	143.1	446.35	349.18	191.97	1667.06	1936.02	1809.74	2037.7
42751.5	163742	228.48	1210.74	2760.24	629.64	1481.88	1353.62	1037.74	361.82	199.08	577.49	2459.18	3801.52	2121.34	2113.96
97452.9	81244	114.24	2835.6	3537.22	556.5	1264.58	5983.7	1513.68	2533.53	778.15	5666.67	2635.48	9617.78	6728.92	3546.5
94803.5	177975	463.08	3607.74	482.3	517.28	1054.7	504.56	619.04	596.45	1687.44	1023.84	4252.52	9313.56	3946.66	6053.24
202487	194613	485.52	3546.54	497.14	532.12	1091.8	405.98	809.84	737.07	2116.41	1207.91	3670.32	6992.96	3399.72	6288.58
105861	178676	826.2	4714.44	414.46	443.08	1126.78	489.72	1163.88	1244.25	4164.88	1947.35	6207.4	4172.98	1814.66	8883.88
106450	196926	517.14	2832.54	411.28	507.74	790.76	604.2	440.96	520.61	2114.04	935.36	4041.78	4474.74	1993.42	5380.02
123499	63857.1	136.68	2476.56	2789.92	581.94	1166	2147.56	1246.56	1325.62	1083.88	5591.62	1946.68	8629.68	4629.72	3175.04
170938	205809	618.12	5134.68	470.64	581.94	1756.42	886.16	944.46	826.34	2458.48	1357.22	6031.92	12845.3	5844.96	9078.22
231234	250318	601.8	4874.58	560.74	711.26	3219.22	4855.86	1421.46	2957.76	3020.17	4296.81	4022.1	8927.34	5482.52	8286.92
178337	67917.7	116.28	2056.32	2782.5	695.36	892.52	2467.68	858.6	1589.48	600.4	5276.41	1869.6	7529.24	4593.64	2924.94
142073	139455	202.98	698.7	352.98	432.48	427.18	131.44	124.02	418.7	287.56	137.46	1756.44	1327.58	457.56	1330.86
116608	60673.7	61.2	750.72	39.22	152.64	345.56	87.98	589.36	69.52	192.76	450.3	1087.32	2521.5	1154.56	1083.22
158786	120887	770.1	4074.9	352.98	454.74	935.98	410.22	766.38	755.24	3769.09	1772.76	4225.46	5636.68	2927.4	7203.7
106016	147077	534.48	2693.82	518.34	520.46	770.62	412.34	872.38	568.8	3154.47	1410.15	3547.32	2641.22	1394	5544.02
90644.4	160430	542.64	4358.46	636	537.42	1190.38	562.86	668.86	1004.88	2938.8	1327.99	4991.34	9213.52	4416.52	6766.64
76634.7	176638	341.7	1762.56	473.82	477	609.5	140.98	1080.14	364.98	1697.71	495.33	2801.94	1645.74	758.5	3875.32
84462.5	136253	139.74	3472.08	291.5	315.88	1281.54	585.12	631.76	336.54	105.86	325.48	3881.88	14537.8	6528.02	4809.3
59440.2	147294	585.48	2525.52	536.36	455.8	677.34	544.84	560.74	974.07	3053.35	1098.89	4053.26	2228.76	1014.34	5553.86
73714.7	155426	170.34	1279.08	1038.8	450.5	511.98	163.24	1079.08	-119.13	366.56	419.49	2250.08	3934.36	1776.94	2310.76
102744	62858.5	37.74	1420.86	2377.58	497.14	786.52	1898.46	1348.32	959.85	582.23	4736.05	1749.06	5804.78	3416.12	2429.66
60011.7	71605	99.96	2085.9	3784.2	947.64	591.48	4498.64	2065.94	3256.38	1222.13	5519.73	1655.58	783.1	5569.44	3367.74
67363.8	107515	178.5	2386.8	2461.32	6398.16	2969.06	751.54	1139.5	413.96	2399.23	1185.79	3021.7	1444.02	757.68	4411.6
128474	95234.3	113.22	1654.44	198.22	302.1	1751.12	3139.72	1073.78	1102.05	598.03	2491.66	2047.54	6806.82	3773.64	2675.66
103301	58832.6	31.62	1781.94	3257.38	696.42	977.32	4221.98	1334.54	1855.71	1087.04	4866.4	1641.64	6710.88	4359.12	2260.74
259815	203859	1088.34	9467.64	528.94	758.96	3092.02	1465.98	1590	1554.72	5936.85	2321.81	10387.8	24604.9	11284	16887.1
89946.6	158180	329.46	2025.72	392.2	344.5	573.46	214.12	510.92	617.78	1328.78	497.7	2653.52	2929.04	1555.54	3958.96
107828	195214	796.62	4476.78	499.26	550.14	1114.06	381.6	1207.34	1129.7	3940.52	1328.78	6306.62	7423.46	3436.62	8897.82
166229	155431	709.92	4842.96	429.3	365.7	1197.8	614.8	895.7	1060.97	3415.96	1425.95	5041.36	10810.9	5202.9	8193.44
197837	202887	379.44	2654.04	450.5	515.16	856.48	345.56	858.6	565.64	1624.24	795.53	3616.2	6095.88	2735.52	4929.02
11876.9	137219	234.6	1489.2	2587.46	3106.86	1693.88	574.52	1541.24	733.91	1030.95	928.25	2238.6	1074.2	793.76	2406.7
Single Cells
Patient 20: Behcets Disease
102860	60320.8	73.44	4333.98	294.68	103.88	2468.74	4174.28	1531.7	1802.78	921.14	4627.82	2888.04	16790.3	8407.46	5229.96
93871.1	170576	246.84	3586.32	2676.5	734.58	1475.52	593.6	550.14	108.23	415.54	513.5	2756.02	12979.8	6025.36	4303.36
250844	120736	131.58	2714.22	5321.2	1068.48	1782.92	12706.2	3198.02	5398.07	1848.6	13029.5	2470.66	7976.96	9440.66	3585.04
37875.8	16922.8	6.12	80.58	166.42	91.16	137.8	174.9	156.88	-74.95	144.57	133.51	197.62	95.12	227.96	111.52
89191.4	56985.4	81.6	1780.92	202.46	218.36	516.22	356.16	1018.66	140.62	357.08	630.42	1539.96	5102.86	2120.52	2127.08
147680	171317	651.78	2494.92	2138.02	643.42	896.76	532.12	1882.56	710.21	5965.29	3820.44	3817.92	4384.54	2325.52	5266.86
156141	179797	578.34	2610.18	593.6	363.58	957.18	581.94	888.28	707.05	4650.73	2071.38	3967.98	5739.18	2798.66	5399.7
123498	62478.1	127.5	2597.94	330.72	369.94	1475.52	4408.54	1417.22	1738.79	861.1	5734.61	2332.08	10286.1	5881.04	3366.1
134892	61222.4	64.26	1703.4	2906.52	514.1	992.16	6668.46	2324.58	2801.34	1115.48	9205.08	1427.62	5631.76	5141.4	1828.6
90523.1	48470.4	128.52	5070.42	4094.78	744.12	2047.92	5047.72	1503.08	2362.89	1132.07	10354.5	4034.4	21447.9	11821.1	7136.46
162631	46379.4	96.9	1493.28	3448.18	584.06	899.94	5590.44	2665.9	2692.32	868.21	10136.5	1170.14	5380.02	4930.66	2106.58
137993	63924.4	81.6	1894.14	87.98	42.4	784.4	6161.78	398.56	2315.49	248.85	1659	1284.94	6358.28	5063.5	2218.92
41470.7	43209.2	197.88	460.02	203.52	133.56	143.1	67.84	226.84	119.29	1358.01	688.88	657.64	387.04	318.16	1029.1
70578.2	37400.3	95.88	330.48	246.98	324.36	271.36	22.26	174.9	31.6	188.81	127.19	592.04	272.24	209.92	495.28
134065	225040	867	3092.64	1229.6	655.08	1189.32	643.42	1001.7	934.57	8598.36	4168.83	3918.78	4243.5	2251.72	5828.56
141192	95068.1	170.34	2047.14	3477.86	799.24	1011.24	4471.08	1523.22	2122.73	257.54	2466.38	1622.78	7407.88	5282.44	2833.92
108587	231849	1250.52	4375.8	1073.78	941.28	2085.02	1304.86	1839.1	1248.99	12542.8	5656.4	6021.26	8109.8	4153.3	9702.24
71360.5	210023	402.9	2373.54	1401.32	675.22	1352.56	596.78	825.74	425.81	2745.25	1753.01	2865.9	6542.78	3380.04	4693.68
94920.7	69175.4	45.9	454.92	97.52	277.72	209.88	231.08	690.06	244.11	125.61	229.89	1311.18	1688.38	997.94	910.2
136625	48569.3	78.54	2113.44	3206.5	661.44	884.04	3991.96	1133.14	1869.93	265.44	3235.05	1854.84	7864.62	5379.2	2539.54
23566	11084.3	-3.92	38.76	38.16	39.22	-125.86	-273.46	-11.28	263.86	483.48	553.79	33.62	-69.48	189.42	189.42
179116	203179	1001.64	3709.74	1139.5	887.22	1093.92	596.78	1711.9	931.41	10527.5	4220.18	4669.9	4897.86	2659.26	7279.96
114241	46192.7	63.24	2160.36	109.18	177.02	977.32	3878.54	599.96	1692.18	662.81	2580.14	1615.4	8541.94	5376.74	2673.2
69571.3	83981.7	218.28	936.36	361.46	220.48	379.48	10.6	289.38	251.22	1485.99	435.29	1323.48	2603.5	1222.62	1722
158013	212098	1234.2	3769.92	1623.92	921.14	1186.14	762.14	1848.64	1431.48	10638.9	4959.62	4666.62	4305	2089.36	7872.82
114686	66327.5	107.1	2151.18	114.48	201.4	1191.44	7324.6	1302.74	3077.05	1024.63	5545.8	1843.36	9065.1	7145.48	3126.66
52371.8	168471	222.36	2086.92	3209.68	950.82	1323.94	351.92	1370.58	205.4	466.1	1038.06	3079.1	7285.7	3184.06	2687.14
69325.3	156638	653.82	2385.78	1511.56	4530.44	2824.9	729.28	1379.06	524.56	8219.95	4237.56	3151.26	2350.12	1615.4	5206.18
126698	57009.8	126.48	2313.36	2643.64	727.16	768.5	5369.96	2174.06	2189.09	821.6	8073.01	1785.14	7389.84	5190.6	2690.42
120824	152452	251.94	1069.98	2639.4	629.64	729.28	430.36	853.3	354.71	638.32	775.78	2106.58	2933.14	1457.14	1790.88
28931.2	16090.5	23.46	83.64	209.88	131.44	614.8	1126.78	265	443.19	274.92	179.33	110.7	225.5	305.86	344.4
212163	250704	744.6	7934.58	924.32	710.2	2765.54	1822.14	2926.66	751.29	6237.84	3289.56	6642	24341.7	11083.9	11192.2
37345.3	23353.9	22.44	96.9	-32.08	68.9	66.78	-126.8	-60.52	-44.18	174.59	182.49	234.52	100.86	46.74	154.98
63617.2	221734	877.2	3072.24	1544.42	676.28	1029.26	504.56	1860.3	733.91	8495.66	4122.22	3832.68	3748.22	1983.58	5774.44
102571	73340	114.24	2328.66	177.02	257.58	2132.72	5403.88	1539.12	2254.66	1448.07	4864.82	1909.78	8815.82	6333.68	3287.38
127651	47940	91.8	3014.1	2196.32	508.8	1272	4938.54	1615.44	1991.59	809.75	8566.76	2080.34	10520.6	6519.82	3337.4
86754.4	74956.7	58.14	3923.94	166.42	249.1	2675.44	7179.38	1449.02	2624.38	1102.84	5774.9	3198.82	16727.2	9345.54	5237.34
111909	70579.9	111.18	2768.28	5024.4	916.9	1433.12	6414.06	2595.94	2984.62	1549.19	9985.6	2665	10738.7	7598.94	3759.7
88341.1	59870.9	78.54	2704.02	132.5	184.44	1578.34	3758.76	597.84	1745.9	594.87	2860.59	2179.56	11328.3	6247.58	3855.64
163556	150541	502.86	2310.3	1378	528.94	539.54	383.72	849.06	1098.89	7969.52	3605.56	2346.02	1463.7	1418.6	4843.74
98577.9	79888.4	143.82	2147.1	361.46	305.28	673.1	327.54	256.52	1075.19	1451.23	568.8	1774.48	3397.26	3958.96	3449.74
139299	62169	113.22	2027.76	3583.86	769.56	506.68	5682.66	2229.18	2980.67	809.75	3737.49	711.76	908.56	5988.46	2723.22
70911.1	114829	688.5	2919.24	795	751.54	874.5	433.54	993.22	742.6	6030.07	3385.15	2737.98	3102.88	2135.28	5000.36
57723.9	182721	208.08	1803.36	2264.16	853.3	905.24	373.12	1799.88	218.04	1874.67	951.16	3147.98	5989.28	2596.12	2938.88
114823	61836.5	97.92	1560.6	3415.32	621.16	901	6365.3	1828.5	3419.12	681.77	9930.3	1686.74	5776.9	5037.26	1897.48
134732	74787.4	127.5	414.12	302.1	369.94	2426.34	6416.18	2498.42	2690.74	813.7	6631.26	914.3	1410.4	2934.78	590.4
35524.9	47768.6	66.3	265.2	215.18	558.62	241.68	2.12	147.34	-9.73	158.79	129.56	657.64	407.54	-0.36	482.16
128415	216553	997.56	3356.82	1728.86	4193.36	3218.16	1058.94	1527.46	1485.99	9133.19	3859.15	5084	3298.04	2528.88	6710.06
10472.2	99212.3	329.46	981.24	458.98	332.84	435.66	368.88	651.9	361.03	3368.56	1561.04	1785.14	1178.34	782.28	2520.68
125868	193100	689.52	2586.72	2303.38	942.34	1013.36	468.52	1436.3	680.98	7262.47	4213.86	3869.58	3923.7	1860.58	4989.7
138874	55771.6	120.36	1465.74	2612.9	602.08	4322.68	13631.6	2945.74	4085.88	840.56	5640.6	1662.14	5407.08	6924.08	1551.44
100255	86343	185.64	5173.44	306.34	212	2863.06	9560.14	2404.08	6624.15	2686.79	6350.02	1668.7	4340.26	13999.9	7908.08
49706.8	148554	716.04	3062.04	967.78	1816.84	1619.68	823.62	1595.3	1063.34	10153.1	4657.84	3053.68	3051.22	2383.74	6163.12
3608.82	15808	27.54	40.8	254.4	51.94	98.58	62.54	1.06	109.02	-85.89	-7.31	35.26	52.48	-42.54	-27.3
103760	82003.9	161.16	4299.3	287.26	301.04	1649.36	2987.08	2320.34	2667.83	1205.54	12021.4	3085.66	15656.3	9802.28	6097.52
15482.4	10216.3	24.48	112.2	49.82	143.1	15.9	-67.1	-60.52	-70.9	195.13	116.13	211.56	-12.06	31.98	115.62
39740.5	181031	726.24	2713.2	1661.02	3919.88	2359.56	979.44	1591.06	678.61	8535.16	3682.19	3580.94	2397.68	1663.78	5775.26
102339	204742	921.06	3842.34	2072.3	924.32	1340.9	561.8	1364.22	1051.49	7106.84	3589.76	4883.92	5699	2669.92	7685.86
47461.6	196785	755.82	2681.58	632.82	795	1068.48	649.78	1388.6	502.44	7671.69	3491.8	3154.54	3050.4	1552.26	5177.48
[truncated: 20,441 more rows]
