# Supplementary material for: From Cellular Characteristics to Disease Diagnosis: Uncovering Phenotypes with Supercells
Source: PLoS Comput Biol. 2013 Sep 5;9(9):e1003215. doi: 10.1371/journal.pcbi.1003215 (PMC3763994; doi:10.1371/journal.pcbi.1003215)
Supplement: Dataset S3 — Multicolor flow cytometry (CD4+ T cells) from 22 patients labeled according to disease type or healthy status for a randomized single-cell subsample and for the different supercell sizes used in this paper. (XLS) [file pcbi.1003215.s003.xls]

## Sheet: Export Summary
	This document was exported from Numbers. Each table was converted to an Excel worksheet. All other objects on each Numbers sheet were placed on separate worksheets. Please be aware that formula calculations may differ in Excel.
	Numbers Sheet Name	Numbers Table Name	Excel Worksheet Name
	Sheet 1
		Table 2	Sheet 1 - Table 2

## Sheet: Sheet 1 - Table 2
FSC	SSC	IL23R	CD196	CD4	Viability	CD8	CD27	CD45	IL17A	CD197	CD3	IL22	CD62L	CD161	TNFA
Single Cells
Patient 1: Healthy
49570.9	50807.8	178.19	1786.02	2761.3	663.56	926.44	11632.4	2459.2	5051.97	982.53	9803.43	2072.14	5524.34	6816.66	1946.68
109794	48193.7	181.28	3007.6	3564.78	946.58	491.84	4396.88	2989.2	2304.45	936.36	5491.8	2125.44	1511.26	3111.9	2498.54
99626.5	38505.5	138.02	2015.71	3058.1	780.16	1428.88	14844.2	2978.6	5578.47	526.5	4682.61	2209.9	6879.8	8161.46	2510.84
83717.8	46213	141.11	889.92	2771.9	562.86	821.5	13263.8	2092.44	5392.17	613.17	5610.87	2208.26	1416.14	5417.74	1423.52
89349.1	49318.5	134.93	3064.25	4299.36	949.76	1775.5	14149.9	3379.28	6228.09	1354.32	7673.13	4485.4	9636.64	9772.76	3977.82
63363.7	66594.6	204.97	2202.14	3963.34	906.3	1524.28	15805.7	3839.32	6844.5	1220.67	10418.2	3553.88	7349.66	8984.74	3052.86
83575.8	47415	168.92	4648.39	4047.08	821.5	2259.92	10605.3	3026.3	5471.55	760.59	8933.49	5398.06	19253.6	13084.7	6456.68
116155	49616.1	170.98	2477.15	2248.26	509.86	1394.96	8494.84	2153.92	3780.27	726.57	6335.82	4107.38	9359.48	7272.58	3328.38
105352	43984.1	101.97	1590.32	2831.26	792.88	1040.92	7444.38	2187.84	3759.21	779.22	6848.55	3232.44	6641.18	6355	2691.24
104323	44454.8	187.46	555.17	3076.12	680.52	607.38	5774.88	3194.84	3034.26	387.99	6784.56	1712.16	1375.96	3094.68	935.62
73174.1	50946.9	146.26	1614.01	2810.06	524.7	1284.72	16461.8	2924.54	6650.91	716.04	7468.2	2127.08	3823.66	7749.82	1928.64
78125	58864.5	176.13	2319.56	3457.72	910.54	1330.3	13689.9	2247.2	5697.54	1089.45	5985.09	4406.68	7821.16	8748.58	3148.8
84908	45697	183.34	3286.73	3693.04	937.04	1877.26	10746.3	3399.42	4359.42	1222.29	10708.2	4634.64	12474.7	9385.72	4580.52
92154.7	50231	127.72	812.67	3958.04	783.34	853.3	9382.06	2375.46	4062.15	1073.25	5785.83	2469.84	1668.7	4413.24	932.34
127205	59426.9	202.91	1305.01	4671.42	1162.82	1252.92	10401.8	3148.2	4032.18	393.66	5076.27	1761.36	3885.16	5654.72	1619.5
104126	53129.5	126.69	3989.19	3784.2	811.96	1984.32	10877.7	3076.12	5040.63	1103.22	11752.3	4956.08	15040.4	9999.9	5329.18
62995.8	55571.6	176.13	3895.46	3880.66	850.12	2285.36	18147.2	2128.48	6579.63	1167.21	9056.61	4838	13703.8	12792.8	4874.9
82400.6	60274.6	230.72	2845.89	3661.24	997.46	1686.46	19217.8	4612.06	7448.76	1163.97	6318.81	3316.9	5213.56	10700.2	3296.4
132566	50168.2	311.06	3369.13	3297.66	914.78	1546.54	788.64	3646.4	483.57	426.87	6221.61	5257.84	15690.7	6438.64	5246.36
67605.7	69208.8	243.08	2950.95	4654.46	686.88	1385.42	14604.7	3617.78	6445.98	1040.04	7782.48	4152.48	8726.44	9416.06	4087.7
42766.9	48253.4	121.54	628.3	1633.46	417.64	489.72	7622.46	2664.84	3443.31	628.56	7970.4	1275.92	622.38	3384.96	681.42
62918.5	74636.9	157.59	1525.43	4917.34	1099.22	1133.14	16232.8	2927.72	6207.03	1709.91	10563.2	2819.16	3453.02	8082.74	1774.48
81904.2	46315	223.51	4371.32	4629.02	988.98	2082.9	13936.9	2949.98	5495.04	1915.65	8598.15	5274.24	15645.6	11890.8	5383.3
56046.5	53636.2	186.43	3019.96	2936.2	676.28	1355.74	8372.94	2656.36	3674.16	741.15	7145.01	4455.06	10686.2	7824.44	3977
48540.2	43740	108.15	846.66	2297.02	895.7	966.72	7757.08	1983.26	3829.68	819.72	5832.81	2527.24	2225.48	3613.74	1310.36
100075	62217.2	125.66	1045.45	3074	606.32	965.66	11672.7	2887.44	4898.07	778.41	6422.49	3164.38	2815.88	5445.62	1836.8
99754.2	48413.1	245.14	3058.07	3365.5	787.58	2147.56	17488.9	3393.06	7371.81	1171.26	7784.91	3794.14	9204.5	10993.7	3527.64
107271	47973.3	174.07	1771.6	4182.76	901	1371.64	16508.4	4505	6707.61	814.05	7673.94	2633.84	5009.38	8956.04	2045.08
67368	56560.4	157.59	3048.8	2847.16	825.74	1599.54	10053	2683.92	4575.69	1253.07	7436.61	5110.24	11407.8	8966.7	4369.78
98816.8	48618.1	179.22	1026.91	4795.44	1120.42	941.28	13709	3858.4	4881.06	690.93	7246.26	2993.82	1728.56	5778.54	1335.78
70172.8	60008.8	122.57	1528.52	3575.38	808.78	987.92	10181.3	3808.58	4315.68	1125.09	7613.19	2049.18	1425.16	4942.14	1930.28
50386.6	89274.2	287.37	8477.93	4382.04	1153.28	3484.22	5401.76	2611.84	2081.7	590.49	3816.72	8229.52	34501.5	15962.9	11017.5
97178.8	59659.7	166.86	3435.05	3440.76	835.28	1725.68	10714.5	1988.56	4493.07	1302.48	5440.77	3936.82	10991.3	9216.8	4280.4
62628.7	47917.7	131.84	3054.98	4255.9	1043.04	1709.78	13828.8	2659.54	5023.62	1141.29	7818.12	3579.3	11797.3	9840.82	3806.44
87404.5	45456	108.15	1876.66	2673.32	458.98	1156.46	10169.6	2174.06	4349.7	420.39	4402.35	2350.94	5665.38	6961.8	2264.84
100592	38401.5	175.1	2812.93	3911.4	966.72	1016.54	7817.5	5192.94	4334.31	1159.92	7749.27	1720.36	3806.44	7208.62	3621.12
71519.3	48476.9	153.47	616.97	2125.3	445.2	770.62	7590.66	1812.6	3269.97	619.65	4791.96	1589.16	1411.22	3936.82	899.54
83333	49857.2	155.53	2263.94	3047.5	721.86	1241.26	9066.18	2487.82	3958.47	747.63	6517.26	3284.92	7899.06	6757.62	2647.78
131241	62909.3	242.05	4893.53	4890.84	1131.02	2722.08	12256.8	4162.62	4231.44	362.88	4719.06	5394.78	19370.9	12926.5	6338.6
78811.3	41399.8	201.88	1759.24	4043.9	977.32	1216.88	7219.66	3021	3285.36	1092.69	9548.28	3357.9	7107.76	5333.28	2239.42
97817.2	63504.7	196.73	2429.77	3048.56	762.14	1193.56	17386.1	3578.56	6524.55	1933.47	10960.9	4628.08	6901.12	9051.16	3427.6
100935	54946.4	204.97	3668.86	3680.32	931.74	1897.4	11767.1	3145.02	4643.73	2028.24	8705.88	5049.56	12121.2	9524.3	4300.08
15183	50664.7	143.17	955.84	3542.52	1424.64	1076.96	11730	3952.74	5342.76	1271.7	12599.5	2008.18	969.24	5267.68	1197.2
134439	54583.8	224.54	976.44	5214.14	1216.88	1021.84	11385.5	3007.22	4993.65	807.57	6574.77	1771.2	2507.56	5496.46	1164.4
83186	81647.1	246.17	2419.47	4182.76	1102.4	1418.28	13086.8	2533.4	5418.9	325.62	5368.68	4081.96	6257.42	7522.68	2871.64
86184.8	49951.9	166.86	2152.7	3612.48	947.64	1194.62	10530	3031.6	4539.24	1971.54	6505.92	4017.18	6263.16	7114.32	2882.3
103344	57667.6	156.56	2241.28	4659.76	1066.36	1329.24	18230.9	5032.88	7123.14	970.38	5465.88	2749.46	1880.26	9258.62	2336.18
59474.5	49693.4	163.77	2539.98	5028.64	993.22	1489.3	12843	2992.38	5846.58	1626.48	13390.1	2978.24	9156.94	9232.38	3513.7
136545	48782.9	291.49	1744.82	5373.14	1203.1	1312.28	18479	3910.34	7899.93	1226.34	6592.59	1677.72	1070.92	8438.62	2009
87985.8	55045.3	64.89	2479.21	2927.72	730.34	1618.62	9889.8	1701.3	4080.78	782.46	4803.3	1810.56	9403.76	7869.54	3384.14
69097.6	74275.4	126.69	3622.51	5308.48	1157.52	2229.18	14593	5231.1	5800.41	580.77	5465.07	4964.28	12952.7	10673.9	4585.44
150105	58300.1	185.4	2176.39	5436.74	1369.52	1151.16	8682.46	3249.96	3538.89	89.1	3838.59	2783.08	5228.32	5663.74	2435.4
99552.6	62264.5	298.7	2820.14	6111.96	1433.12	2246.14	26086.6	4137.18	10455.5	2038.77	8724.51	4628.9	7692.42	14441.8	3434.98
69831.7	59211.6	188.49	4722.55	4037.54	742	2157.1	15888.3	3352.78	6384.42	948.51	7916.94	4564.12	17094.5	13429.1	5954.84
104011	51173.5	123.6	434.66	3918.82	1069.54	643.42	4535.74	2440.12	2030.67	244.62	4346.46	669.12	533.82	2177.92	419.02
105238	56696.3	193.64	1652.12	5083.76	1083.32	1150.1	13825.6	3072.94	5188.86	816.48	3863.7	2514.12	1357.1	6268.08	1526.02
75544.6	50244.4	106.09	3435.05	3177.88	694.3	1745.82	10154.8	2536.58	4110.75	945.27	7639.92	4331.24	14038.4	9498.06	4586.26
132841	59878	144.2	2256.73	5185.52	1333.48	735.64	5657.22	3587.04	2534.49	1334.88	5600.34	1480.1	701.1	3828.58	2378
69652.8	59084.9	123.6	4095.28	3023.12	766.38	1768.08	11060	2302.32	4347.27	1085.4	6149.52	4067.2	14928.1	10123.7	5161.08
88778.8	44346.7	126.69	2432.86	3222.4	795	1744.76	13448.2	2779.32	5832.81	976.05	6251.58	3136.5	9003.6	9487.4	3357.9
84577.9	46342.8	192.61	489.25	2318.22	593.6	505.62	4480.62	3513.9	1844.37	217.08	4344.03	2510.02	1159.48	2150.04	1003.68
99038.5	39807.4	192.61	2131.07	3110.04	668.86	1158.58	10738.9	2737.98	4916.7	848.88	9101.16	3133.22	7114.32	7151.22	2724.04
65100	59078.7	111.24	2880.91	3093.08	820.44	1609.08	12293.9	2638.34	5316.84	1248.21	10125	4806.02	9438.2	9421.8	3623.58
75658.8	55799.2	123.6	1824.13	4048.14	863.9	1174.48	9864.36	3069.76	4297.86	1068.39	8112.96	4315.66	5814.62	6527.2	2716.66
77563.9	55538.6	78.28	1859.15	3174.7	696.42	1390.72	10140	2471.92	4264.65	822.96	6155.19	3767.08	7443.96	6910.14	2640.4
44599	57786.1	155.53	522.21	3241.48	634.94	763.2	11237.1	1952.52	4705.29	584.82	4060.53	806.06	488.72	4755.18	783.92
85226.4	42698.7	37.08	1305.01	2612.9	511.98	947.64	6785.06	2121.06	2749.14	710.37	6970.86	1655.58	5147.96	4491.14	1995.06
111037	42903.6	145.23	1120.64	2321.4	623.28	787.58	7549.32	2166.64	3108.78	368.55	4765.23	1775.3	3376.76	4704.34	1503.88
39440.5	62265.6	169.95	2616.2	3776.78	860.72	1506.26	12394.6	2065.94	5391.36	1114.56	4023.27	4077.04	8834.68	8803.52	3088.12
103133	63016.4	163.77	1851.94	4043.9	797.12	1190.38	13182.2	2412.56	6360.93	817.29	8448.3	4410.78	5618.64	8134.4	2522.32
109166	50715.1	203.94	2859.28	3791.62	951.88	1666.32	12832.4	2678.62	5324.13	1253.07	9299.61	3096.32	9299.62	8940.46	3274.26
33347.2	102765	391.4	4997.56	3725.9	1010.18	1744.76	3075.06	4091.6	2128.68	1001.97	9358.74	5363.62	15104.4	8284.46	7006.9
65571.2	58657.5	79.31	661.26	2732.68	738.82	474.88	6298.52	2378.64	2528.82	409.05	3849.12	1334.96	618.28	2806.04	779
70059.4	45692.9	273.98	2175.36	2432.7	577.7	1001.7	12618.2	3186.36	5016.33	1052.19	4209.57	4059.82	1822.86	7727.68	2932.32
149858	47911.5	142.14	2595.6	5375.26	1108.76	480.18	398.56	3377.16	873.99	1260.36	4946.67	730.62	327.18	1375.96	2250.08
120692	57786.1	226.6	2068.24	4329.04	1089.68	1346.2	12626.7	3117.46	4412.07	1057.05	4573.26	1747.42	1062.72	5950.74	1980.3
88426.8	54813.5	124.63	2378.27	2303.38	537.42	1584.7	14166.9	3256.32	5912.19	923.4	7656.12	3898.28	8938	9151.2	3436.62
42373	56633.5	81.37	590.19	2012.94	514.1	447.32	6838.06	2572.62	3641.76	1094.31	8912.43	1268.54	679.78	2777.34	987.28
127150	53947.3	241.02	3692.55	2871.54	945.52	2570.5	28968.7	2326.7	11551.4	1144.53	8013.33	4191.02	13026.5	16567.3	4336.16
155613	60634	173.04	3343.38	5444.16	1303.8	1538.06	2474.04	2799.46	1685.61	771.12	6717.33	2646.96	11703	5943.36	4070.48
52825.9	66771.8	126.69	2934.47	3853.1	878.74	1388.6	10209.9	4589.8	3967.38	728.19	5844.96	3738.38	10318.9	8500.12	4128.7
64876.6	97473	216.3	2864.43	4049.2	813.02	1539.12	12593.9	3747.1	5107.05	868.32	7402.59	4006.52	8755.14	8427.14	3744.12
81131.4	60795.8	310.03	5380.72	4562.24	1062.12	2593.82	15234.3	2295.96	5390.55	560.52	2561.22	4514.92	17142.1	13795.7	6418.14
75784.8	59654.5	144.2	1464.66	3545.7	622.22	1479.76	27085.1	3821.3	10969.8	1010.07	6800.76	2116.42	2177.1	11302.9	1458.78
83622.8	44035.6	124.63	2527.62	2731.62	518.34	1440.54	8328.42	1937.68	3224.61	928.26	5746.95	3361.18	10117.2	7365.24	3623.58
74885.2	40123.7	119.48	811.64	2199.5	523.64	930.68	12412.6	2429.52	5137.83	784.89	7115.04	1874.52	2391.12	5606.34	1445.66
127457	40294.6	79.31	2247.46	4176.4	941.28	1109.82	371	2833.38	537.03	369.36	5054.4	1755.62	9025.74	3886.8	2908.54
102437	62205.8	295.61	10454.5	3698.34	832.1	4241.06	21615.5	1964.18	7318.35	638.28	3381.75	9055.26	40299.7	24376.1	12695.2
87906	66454.6	142.14	841.51	2703	564.98	742	10137.8	3991.96	4229.01	386.37	5162.13	2359.96	1671.98	4781.42	1220.16
89017.3	59277.5	214.24	2568.82	3986.66	978.38	1588.94	15721.9	3222.4	6341.49	1440.18	10559.2	4770.76	7857.24	10298.4	3585.04
113896	41071.2	175.1	1028.97	3693.04	844.82	932.8	4674.6	2471.92	2199.15	343.44	6413.58	1403.84	3191.44	3453.84	1064.36
84186.5	42436	157.59	2972.58	3449.24	692.18	1411.92	8972.9	2498.42	3952.8	1116.99	6774.03	3327.56	10309	7809.68	3815.46
23294.9	22367.5	75.19	329.6	1848.64	367.82	513.04	7097.76	1542.3	3229.47	769.5	7166.07	651.9	632.22	3166.84	519.06
128124	58568.9	236.9	809.58	5735.66	1293.2	832.1	6397.1	3577.5	2968.65	493.29	6271.83	1439.92	1008.6	2933.14	1068.46
88089.1	68230.3	162.74	3868.68	4085.24	954	1007	15826.9	4440.34	8639.46	2204.01	9004.77	2901.98	1410.4	11747.3	4888.84
129019	45382.8	138.02	1538.82	4320.56	864.96	622.22	6257.18	1957.82	3029.4	1018.17	6101.73	434.6	408.36	3296.4	1528.48
91820.4	42907.7	117.42	3689.46	3514.96	919.02	1772.32	11580.5	2409.38	5117.58	1048.14	6151.14	4300.08	12302.5	10040.1	4306.64
77051.5	38822.8	157.59	1742.76	2536.58	576.64	1104.52	9747.76	2085.02	3713.85	1096.74	4391.01	3545.68	5081.54	6086.86	2229.58
117891	69287.1	278.1	2658.43	4483.8	970.96	1274.12	11148	3946.38	4177.17	993.87	3989.25	2680.58	6606.74	7458.72	2786.36
41658.1	61675.4	185.4	1856.06	3292.36	737.76	767.44	8724.86	2731.62	4716.63	861.03	4489.02	1986.86	947.1	6389.44	2679.76
Single Cells
Patient 2: Healthy
39086.9	30828.9	72.1	698.34	2411.5	508.8	696.42	13640.1	2343.66	5012.28	671.49	4008.69	891.34	717.5	5848.24	538.74
12541.2	39849.7	86.52	612.85	4441.4	1209.46	643.42	12841.9	3947.44	5610.06	1219.05	9608.22	843.78	714.22	5055.3	754.4
101772	33820.1	150.38	1159.78	3513.9	649.78	1035.62	15609.6	3915.64	6502.68	1434.51	7538.67	882.32	2324.7	7120.06	1389.08
103882	74670.9	238.96	1745.85	5011.68	1235.96	890.4	431.42	4193.36	764.64	543.51	9159.48	3124.2	5243.9	2706	2362.42
126712	67407.3	169.95	619.03	3417.44	957.18	576.64	8443.96	5015.92	3798.09	644.76	9028.26	2117.24	1096.34	3539.12	931.52
45402	44148.9	156.56	678.77	2765.54	584.06	551.2	8523.46	1886.8	3837.78	1471.77	5772.06	994.66	641.24	3725.26	1023.36
44179.8	75008.7	103	615.94	3176.82	773.8	919.02	11550.8	4759.4	5090.04	479.52	7254.36	1080.76	903.64	5057.76	838.04
121409	37726.8	98.88	230.72	3300.84	775.92	316.94	773.8	1856.06	788.94	301.32	5007.42	602.7	1025	572.36	264.86
87675	65145.4	292.52	3894.43	5174.92	1106.64	2845.04	29675.8	4229.4	10992.5	1234.44	8048.97	4459.98	11462.8	16721.4	4599.38
85542.2	56252.4	175.1	1282.35	3466.2	817.26	1191.44	14940.7	3840.38	5792.31	1130.76	8526.06	2416.54	3413.66	7493.16	1798.26
130955	48533.6	235.87	1505.86	5330.74	1217.94	666.74	1627.1	3667.6	1794.96	735.48	5016.33	1111.92	484.62	2437.04	2312.4
101884	33649.1	105.06	166.86	2246.14	689	311.64	220.48	1226.42	124.74	268.11	5235.03	420.66	304.22	229.6	240.26
123514	54885.6	132.87	7284.16	4675.66	807.72	2878.96	17026.8	2676.5	7595.37	1528.47	3359.88	4441.12	24125.2	19380.7	9042.14
93761.6	40925	164.8	1393.59	3282.82	737.76	1212.64	10534.3	2151.8	3739.77	1134	3670.11	2602.68	3653.92	5121.72	1857.3
131547	53947.3	203.94	2500.84	5790.78	1351.5	1692.82	11919.7	2875.78	4920.75	545.94	7707.96	2685.5	8847.8	7793.28	2707.64
85367.5	47083.4	213.21	1259.69	4280.28	1055.76	1455.38	12911.9	2501.6	4676.13	643.95	4940.19	2447.7	3203.74	6024.54	1548.16
28026.6	36813.2	32.96	408.91	2774.02	634.94	371	5908.44	1974.78	2511.81	754.11	6388.47	830.66	544.48	2487.88	644.52
54786.5	67486.6	193.64	3353.68	2847.16	620.1	683.7	10376.3	3247.84	6606.36	1828.17	6160.86	1714.62	1003.68	10830.6	5128.28
89064.4	36766.9	30.9	3829.54	2726.32	578.76	1789.28	14172.2	2502.66	4894.02	600.21	6101.73	3471.88	14482.8	10944.5	4341.08
25468	35103.4	142.14	831.21	2689.22	670.98	639.18	9744.58	2907.58	4560.3	631.8	8389.98	1318.56	762.6	4344.36	1020.08
56077.6	50178.5	162.74	2283.51	4403.24	1089.68	1699.18	16422.6	1754.3	7114.23	1048.95	6019.11	1526.02	7329.16	10261.5	2710.92
68544.8	34117.7	141.11	3396.94	3653.82	718.68	1734.16	10096.5	1886.8	4135.86	1244.16	4972.59	3416.12	11749.8	8803.52	3862.2
75442.9	45358.1	141.11	2773.79	3758.76	859.66	1467.04	7782.52	1583.64	3353.4	581.58	5923.53	2856.88	10262.3	7680.12	3439.08
105659	48248.3	113.3	1406.98	6313.36	1314.4	945.52	7947.88	2778.26	4668.03	784.08	8900.28	903.64	948.74	5477.6	2030.32
78331.7	48914.7	163.77	3550.41	3797.98	678.4	1612.26	11532.8	2533.4	4739.31	999.54	7565.4	3927.8	11830.1	9418.52	4309.92
73019.5	68103.6	233.81	3735.81	3764.06	878.74	1604.84	18051.8	4009.98	8841.96	1938.33	6330.96	3854	7118.42	12780.5	4605.12
102006	39882.6	92.7	141.11	3220.28	947.64	320.12	19.08	1396.02	170.91	77.76	1697.76	975.8	462.48	318.16	683.88
91696.9	57416.3	155.53	2591.48	4400.06	895.7	1979.02	21503.2	3962.28	7530.57	1121.85	4891.59	3384.14	8636.24	11175.8	3321.82
129368	42229	206	2475.09	4180.64	869.2	1003.82	12693.5	2758.12	6381.99	1699.38	4257.36	1416.14	842.14	7638.3	2972.5
111140	43725.6	191.58	2872.67	3385.64	944.46	1025.02	15430.4	4214.56	6823.44	1512.27	8441.01	2470.66	1306.26	8653.46	2956.92
91000.6	78361.4	166.86	592.25	3135.48	945.52	518.34	2077.6	2567.32	2034.72	240.57	6690.6	2364.06	1046.32	1188.18	648.62
117568	49788.1	236.9	2908.72	4096.9	866.02	1843.34	11191.5	5208.84	4667.22	788.13	8185.86	3567	9622.7	8684.62	3524.36
43606.1	61423	74.16	950.69	2881.08	782.28	1034.56	9922.66	2636.22	3632.85	639.09	3888	1712.16	2261.56	4691.22	1380.06
93066.1	32085.5	138.02	2269.09	4289.82	854.36	1285.78	12117.9	2269.46	5135.4	543.51	6237	2496.08	8053.22	8237.72	2679.76
13114.1	38170.8	119.48	542.81	3483.16	930.68	738.82	7711.5	2644.7	3437.64	1089.45	8095.14	1616.22	1036.48	3628.5	993.84
162865	66210.5	112.27	1253.51	6327.14	1282.6	471.7	382.66	3299.78	685.26	717.66	3909.06	1076.66	596.96	972.52	1138.16
86665.3	40922.9	142.14	3088.97	3170.46	595.72	1689.64	8622.04	2268.4	3599.64	911.25	5836.86	3360.36	12582.9	8611.64	4399.3
82779.5	43880.1	145.23	2893.27	3942.14	851.18	1515.8	9856.94	4064.04	3476.52	703.08	6171.39	3585.86	10549.3	8147.52	3542.4
28950.6	83623.6	246.17	2556.46	5098.6	963.54	1407.68	22944.8	4571.78	9136.8	1203.66	5194.53	3124.2	2018.02	11604.6	3111.08
98346.4	47407.8	178.19	4173.56	3677.14	672.04	2003.4	13569.1	2533.4	5661.9	1799.82	8718.84	4106.56	15433.2	11653	5417.74
88576.3	72810.7	237.93	5054.21	5151.6	1052.58	1942.98	11603.8	3663.36	4774.95	817.29	5291.73	4370.6	14304.9	11241.4	6114.74
62364.1	89750.1	178.19	1137.12	4987.3	1136.32	403.86	216.24	3381.4	751.68	854.55	6974.1	2173.82	1024.18	1011.88	1607.2
138177	42253.7	195.7	768.38	4528.32	1065.3	749.42	7037.34	4017.4	2858.49	439.83	4790.34	1628.52	924.14	3289.02	938.08
65431	66475.2	129.78	3478.31	5488.68	1211.58	1631.34	16584.8	3675.02	7608.33	1086.21	4530.33	2426.38	5035.62	11619.4	4822.42
97359.4	40670.6	100.94	835.33	4665.06	906.3	345.56	251.22	2368.04	886.14	399.33	3939.03	1166.86	1079.94	1444.84	1631.8
107349	47537.6	184.37	1572.81	4428.68	890.4	734.58	8229.84	3474.68	4129.38	912.87	7455.24	2074.6	952.02	4127.06	1664.6
126772	40066	89.61	119.48	2828.08	555.44	110.24	74.2	2606.54	656.1	338.58	7525.71	892.98	484.62	97.58	410
59799.6	46411.8	172.01	2352.52	1195.68	405.98	487.6	563.92	1824.26	2058.21	953.37	2024.19	1487.48	780.64	3943.38	3343.14
63367.9	65469.9	191.58	993.95	4155.2	1038.8	626.46	322.24	2129.54	1257.93	558.9	7116.66	2889.68	3099.6	1063.54	1143.08
114129	37098.5	122.57	962.02	3122.76	682.64	576.64	4679.9	2252.5	1440.99	432.54	3868.56	1100.44	2312.4	2401.78	968.42
172567	60388.9	194.67	1154.63	4751.98	1090.74	554.38	257.58	2241.9	1133.19	869.94	6081.48	1170.96	537.92	2105.76	1716.26
81916	65374.1	222.48	2959.19	3638.98	862.84	1212.64	12706.2	2975.42	5210.73	710.37	5464.26	2748.64	5656.36	9436.56	4090.16
56642	60364.2	192.61	1003.22	2456.02	647.66	1048.34	21013.4	2916.06	8181	1482.3	9177.3	2003.26	1193.92	8901.92	1506.34
31313.5	25548.1	37.08	520.15	2072.3	345.56	478.06	9623.74	2558.84	4428.27	767.07	8690.49	539.56	482.98	4372.24	797.86
123464	55041.1	155.53	776.62	4101.14	1000.64	374.18	357.22	2941.5	944.46	655.29	5810.13	1257.88	549.4	1104.54	1061.9
45721.2	42206.3	180.25	627.27	2286.42	994.28	764.26	7506.92	1803.06	3687.12	629.37	6128.46	1220.98	761.78	3503.04	726.52
96318.6	37474.5	133.9	2332.95	3750.28	798.18	1478.7	14938.6	2588.52	6174.63	1118.61	10086.1	2808.5	6934.74	8692	2738.8
41502.7	46481.8	89.61	735.42	3086.72	658.26	762.14	10121.9	2575.8	4041.9	670.68	5482.08	755.22	619.1	4430.46	778.18
99089.8	45858.7	136.99	187.46	2745.4	657.2	280.9	76.32	2613.96	511.92	374.22	5671.62	1082.4	625.66	261.58	649.44
29992.2	46548.8	120.51	791.04	2257.8	442.02	393.26	3863.7	3858.4	2856.87	1356.75	10609.4	1120.94	692.08	2424.74	945.46
71059	45608.4	146.26	1671.69	2944.68	711.26	908.42	9090.56	2244.02	3920.4	1624.86	5931.63	2151.68	4644.48	5798.22	2155.78
32303.9	84331.2	259.56	4203.43	4374.62	825.74	1944.04	18394.2	3626.26	7486.83	1166.4	6549.66	4034.4	10821.5	13270.1	5736.72
60149	73763.4	193.64	3580.28	3578.56	852.24	1845.46	14063	2216.46	5949.45	836.73	6253.2	3486.64	12524.7	11171.7	4515.74
162271	48626.3	237.93	433.63	5469.6	1250.8	510.92	1882.56	4336.46	1296	366.12	4864.05	1107	1080.76	1215.24	562.52
98555.5	36015	139.05	2274.24	4608.88	1035.62	1311.22	10030.8	1975.84	4993.65	1129.14	7448.76	2877.38	8360.72	7808.86	2868.36
56630.3	33115.5	95.79	479.98	2831.26	572.4	456.86	4241.06	2162.4	2609.01	884.52	8474.22	773.26	395.24	2156.6	732.26
20060	34026.1	96.82	986.74	3140.78	890.4	709.14	7591.72	2981.78	3819.15	1424.79	9221.85	1165.22	768.34	3923.7	1358.74
149470	53662	164.8	2234.07	5639.2	1329.24	1054.7	13536.2	3669.72	7195.23	1417.5	8020.62	1057.8	791.3	9265.18	3343.14
55408.9	46034.8	213.21	2451.4	3124.88	742	1500.96	9237.9	2333.06	4051.62	763.83	6179.49	3160.28	9361.12	8153.26	3762.98
61024.3	56280.2	187.46	3039.53	3866.88	954	2266.28	18169.5	4016.34	6944.94	1423.17	9106.02	4714.18	10186.9	10588.7	3628.5
133212	35914	187.46	1923.01	3757.7	937.04	1108.76	5646.62	3523.44	2387.07	865.08	5273.1	2264.02	7198.78	4719.1	2535.44
81067.6	58119.8	241.02	4301.28	3608.24	820.44	2258.86	11088.7	2093.5	4367.52	1035.18	7880.49	4590.36	14873.2	10389.4	5044.64
42557.8	49477.1	111.24	1560.45	4031.18	680.52	1366.34	15683.8	2777.2	6138.18	417.96	4350.51	3239.82	4833.08	8410.74	2024.58
75208.6	60524.9	202.91	987.77	3488.46	803.48	1062.12	16342	2406.2	7703.91	1057.05	11507.7	818.36	1637.54	7179.1	874.12
119405	47133.8	150.38	1616.07	4535.74	1094.98	575.58	298.92	2396.66	1903.5	1063.53	6204.6	1445.66	653.54	3507.14	2959.38
21882	64783.9	151.41	667.44	3327.34	873.44	1217.94	15191.9	3238.3	5877.36	860.22	7645.59	756.86	776.54	6250.86	919.22
48762.8	58294.9	213.21	855.93	3948.5	867.08	885.1	13391	3803.28	5473.17	1797.39	9033.93	896.26	938.08	5546.48	1229.18
97337.5	43009.7	203.94	3276.43	3755.58	742	1933.44	15702.8	2573.68	6143.04	922.59	7519.23	3670.32	11846.5	11568.6	3658.02
108840	33561.5	174.07	612.85	3397.3	793.94	684.76	9403.26	2023.54	3903.39	320.76	3487.86	1603.1	2088.54	4708.44	1135.7
74884.3	36061.3	109.18	1941.55	2725.26	558.62	1302.74	10049.9	2217.52	4163.4	660.96	4420.98	2601.04	7061.02	7338.18	2637.94
39816.8	45974.1	111.24	881.68	3300.84	588.3	502.44	10624.4	3787.38	4492.26	811.62	6836.4	1634.26	1283.3	5433.32	1267.72
78818	51281.6	295.61	2402.99	3211.8	722.92	1321.82	13017.9	2645.76	5374.35	1108.89	6930.36	2842.12	7452.98	8706.76	3024.16
106922	50971.6	198.79	1696.41	4354.48	955.06	1871.96	21925	3194.84	8421.57	669.06	4479.3	2238.6	4122.96	11021.6	2440.32
84429.2	54904.2	131.84	900.22	3680.32	987.92	1092.86	12771.9	2890.62	5307.93	896.67	4735.26	2040.98	1480.92	6083.58	1366.12
107825	36132.4	46.35	3266.13	3288.12	779.1	1567.74	17537.7	4258.02	6552.09	775.17	8836.29	2126.26	10847	11391.4	3444
63435.1	63070	118.45	1846.79	3712.12	841.64	558.62	6687.54	3002.98	3647.43	810.81	3632.85	2382.1	1321.84	5177.48	2596.12
35373.2	34265	16.48	402.73	1288.96	430.36	223.66	5920.1	1055.76	3120.93	780.03	6112.26	723.24	537.1	2585.46	888.06
137116	49877.8	141.11	1502.77	4021.64	1180.84	1552.9	398.56	1752.18	844.83	482.76	6357.69	1975.38	6872.42	2801.94	1941.76
77821	37584.7	93.73	1661.39	3476.8	707.02	1179.78	12707.3	2920.3	4761.99	891.81	5865.21	2048.36	5780.18	7779.34	2300.92
109838	35458.8	148.32	739.54	4659.76	889.34	1003.82	14852.7	4110.68	6941.7	914.49	10223	710.94	1024.18	6135.24	756.04
98502.6	127490	317.24	2912.84	4254.84	1108.76	1405.56	12568.4	4208.2	5030.91	2088.99	8631.36	2981.52	2971.68	6780.58	3422.68
60131.4	70371.7	179.22	3187.85	3624.14	797.12	1715.08	12270.6	2675.44	5555.79	873.18	7148.25	3342.32	10319.7	9676.82	3882.7
14849.5	41181.5	168.92	1049.57	3239.36	622.22	1061.06	15713.4	2899.1	6458.94	1371.33	11087.3	1470.26	940.54	6356.64	1847.46
54815.9	48943.5	174.07	560.32	3308.26	742	532.12	7244.04	2219.64	3418.2	884.52	6624.18	1242.3	674.86	3229.16	867.56
218682	82663.7	283.25	1833.4	3699.4	1176.6	1097.1	517.28	2580.04	794.61	822.96	6246.72	2533.8	4770.76	2178.74	2173.82
118542	39418.1	166.86	1358.57	4326.92	898.88	937.04	7275.84	2623.5	3899.34	903.96	4754.7	976.62	707.66	5243.9	1929.46
90147.1	46262.4	89.61	3130.17	4015.28	920.08	1868.78	17284.4	2373.34	6424.11	970.38	5233.41	3424.32	10694.4	11132.3	3617.84
110614	70888.7	310.03	4763.75	5080.58	1265.64	2573.68	19898.3	3355.96	7249.5	1774.71	5061.69	4609.22	13525.9	14614	5827.74
80261.2	45641.4	144.2	1871.51	3831.9	814.08	1156.46	14925.9	4618.42	6254.01	1056.24	6840.45	2710.92	4837.18	8249.2	1994.24
33849.5	35986.1	59.74	788.98	3114.28	546.96	580.88	8064.48	2662.72	3691.17	1316.25	7773.57	528.08	479.7	3690.82	777.36
Single Cells
Patient 3: Healthy
105026	56221.5	194.67	1791.17	3782.08	853.3	1396.02	15957.2	3417.44	7021.08	1144.53	11665.6	3302.14	4766.66	8252.48	2335.36
89239.1	33430.7	192.61	632.42	2489.94	477	723.98	8607.2	2110.46	4100.22	819.72	4765.23	1504.7	1058.62	4066.38	738.82
42929	56959	145.23	2144.46	3599.76	739.88	1394.96	13314.7	3302.96	5312.79	946.08	8220.69	2911	6344.34	7720.3	2651.88
72675.1	66450.4	222.48	972.32	2600.18	623.28	1002.76	8224.54	2350.02	4203.09	708.75	6081.48	1329.22	2202.52	4211.52	1433.36
58944.5	32648.9	118.45	555.17	2654.24	562.86	488.66	8384.6	2221.76	3157.38	600.21	4663.98	1135.7	669.12	3269.34	520.7
66987.5	129353	508.82	5436.34	2362.74	753.66	592.54	735.64	1932.38	2742.66	9823.68	4450.95	6035.2	3102.88	6910.14	8937.18
117789	45130.5	217.33	584.01	2446.48	658.26	694.3	10640.3	2292.78	4075.11	662.58	4101.84	1416.96	829.02	4472.28	754.4
133405	36257	173.04	865.2	2641.52	689	929.62	14928	2008.7	5597.1	664.2	5173.47	1240.66	918.4	5857.26	856.08
66694.3	76474.4	155.53	672.59	3128.06	683.7	619.04	9039.68	1533.82	3767.31	667.44	4076.73	1627.7	896.26	4019.64	970.88
94276.6	91880.1	221.45	2921.08	4373.56	951.88	1105.58	7640.48	4483.8	3823.2	750.06	6434.64	2724.86	6562.46	7462.82	3854.82
89376.8	47266.7	215.27	1117.55	3034.78	742	947.64	9035.44	3077.18	3683.88	841.59	6083.91	1676.08	2424.74	4440.3	1323.48
159340	59912	163.77	315.18	4501.82	1046.22	330.72	309.52	2288.54	379.89	490.05	3987.63	1576.86	789.66	261.58	381.3
49661.6	46146.1	47.38	563.41	2115.76	642.36	536.36	7678.64	2006.58	3338.01	479.52	2907.09	698.64	661.74	3467.78	485.44
48236.2	57665.6	197.76	965.11	3143.96	727.16	752.6	9072.54	2812.18	3516.21	938.79	8618.4	2290.26	1997.52	4282.04	1712.98
101079	32421.3	165.83	1150.51	2467.68	579.82	1190.38	19398	2955.28	7871.58	714.42	6714.9	2710.1	1358.74	8271.34	1250.5
106507	40198.8	64.89	991.89	3922	819.38	696.42	7885.34	1709.78	4827.6	1247.4	4384.53	1542.42	2351.76	4339.44	1439.92
36593.8	47715.8	143.17	938.33	2357.44	903.12	605.26	6421.48	3400.48	3341.25	914.49	5511.24	1038.12	537.92	3642.44	1477.64
78706.3	40559.3	104.03	758.08	2957.4	594.66	742	7579	2290.66	3355.02	953.37	6000.48	893.8	593.68	3682.62	736.36
24782.5	65452.4	167.89	822.97	4574.96	1044.1	379.48	62.54	2303.38	632.61	487.62	5328.99	2160.7	874.94	834.76	955.3
195248	45094.4	115.36	2023.95	3556.3	663.56	520.46	6915.44	2541.88	4781.43	1402.92	6223.23	801.14	424.76	6474.72	3034.82
137085	38973.1	52.53	723.06	3106.86	709.14	893.58	11564.6	2335.18	5042.25	781.65	8688.06	1142.26	1157.02	4664.16	844.6
64321.3	49254.6	79.31	871.38	4001.5	787.58	778.04	9268.64	1859.24	3754.35	1100.79	4665.6	1222.62	2123.8	4377.16	1184.08
85213	54154.3	196.73	663.32	3657	792.88	840.58	11441.6	2820.66	5571.99	1138.05	9287.46	1058.62	669.94	4999.54	730.62
102111	59814.2	134.93	1150.51	5058.32	1176.6	829.98	11243.4	3473.62	4604.04	378.27	5193.72	1689.2	1037.3	5149.6	1445.66
33946.1	59155	164.8	965.11	3296.6	751.54	974.14	11709.8	2305.5	5482.89	1215	8823.33	2210.72	2327.98	5581.74	1347.26
52428.6	50567.8	71.07	1347.24	3295.54	699.6	1094.98	9865.42	2416.8	4096.17	1027.08	6222.42	2143.48	4227.92	5579.28	1831.06
88971.1	52247.8	164.8	704.52	3145.02	720.8	805.6	11069.6	2200.56	5412.42	930.69	6652.53	1558	787.2	4592.82	941.36
78337.6	54242.9	147.29	917.73	2801.58	588.3	659.32	9909.94	2308.68	4323.78	1047.33	6948.99	1201.3	1871.24	4960.18	892.98
73615.9	52361.1	143.17	591.22	3537.22	765.32	857.54	10574.6	1873.02	4756.32	1001.16	6739.2	2447.7	1325.94	4902.78	995.48
109880	35792.5	220.42	839.45	1934.5	552.26	753.66	13051.8	2637.28	5706.45	700.65	8575.47	1767.92	938.9	5612.08	1133.24
198378	54025.6	223.51	253.38	5523.66	1209.46	422.94	387.96	2445.42	402.57	264.87	4107.51	639.6	175.48	186.14	580.56
117627	70888.7	201.88	2250.55	4767.88	1047.28	1487.18	13878.6	3287.06	5945.4	1253.07	11425.9	3808.08	6788.78	8710.86	3174.22
70888.4	60589.8	76.22	707.61	2878.96	594.66	856.48	11693.9	2233.42	5203.44	870.75	4949.1	1453.04	976.62	5500.56	983.18
148127	63229.6	204.97	2257.76	4296.18	938.1	1174.48	12433.8	2684.98	5427.81	820.53	4355.37	2968.4	7997.46	8558.34	2895.42
115841	49654.2	204.97	980.56	3172.58	771.68	823.62	13585	2371.22	5367.87	710.37	8861.4	1442.38	1828.6	6182.8	1170.14
33075.8	44448.6	92.7	834.3	3301.9	791.82	677.34	7145.46	2717.84	3923.64	1164.78	9496.44	902.82	682.24	2937.24	997.94
53324.9	66319.6	118.45	948.63	2902.28	880.86	1237.02	12450.8	2400.9	5023.62	883.71	7164.45	1697.4	2019.66	6219.7	1390.72
63887	62697.1	228.66	680.83	2653.18	708.08	713.38	10222.6	2876.84	4362.66	624.51	8084.61	1123.4	801.96	4555.92	846.24
4520.88	41725.3	120.51	900.22	3236.18	567.1	1071.66	14021.7	3145.02	6019.11	1602.99	10565.6	1174.24	825.74	5773.62	1209.5
80501.4	40077.3	-2.91	172.01	1212.64	416.58	349.8	1047.28	1127.84	622.89	338.58	2498.04	168.1	327.18	642.88	405.9
83767.3	63862.1	182.31	1036.18	3170.46	590.42	782.28	10025.5	1826.38	3731.67	555.66	3445.74	1052.88	1107.82	4750.26	1086.5
80779.4	123769	499.55	4022.15	1830.62	975.2	997.46	510.92	1534.88	1612.71	10942.3	5358.15	7731.78	3635.06	3677.7	7663.72
63913.1	38834.1	133.9	410.97	2987.08	654.02	497.14	6711.92	1704.48	3338.01	764.64	6863.13	1375.96	679.78	3058.6	545.3
95303	81579.1	192.61	1317.37	5224.74	1213.7	1328.18	16174.5	3940.02	8136.45	1508.22	13665.5	1906.5	1413.68	7786.72	1503.06
182831	95068	278.1	1123.73	3452.42	903.12	1064.24	11684.4	2684.98	6130.08	959.85	7562.16	1330.04	1381.7	6705.96	1504.7
38509	65154.7	144.2	909.49	4077.82	816.2	848	11543.4	3245.72	5293.35	760.59	8984.52	2423.1	1161.94	5475.14	1102.9
41380.9	73255.7	277.07	1642.85	3990.9	773.8	188.68	271.36	3065.52	1729.35	891.81	4203.09	1774.48	542.02	2251.72	2624.82
86089.1	78956.7	263.68	783.83	2336.24	640.24	489.72	257.58	2390.3	605.07	485.19	3313.71	2194.32	1048.78	704.38	942.18
75655.4	32721	126.69	697.31	2517.5	932.8	761.08	9396.9	1632.4	3905.82	530.55	6166.53	1009.42	421.48	3732.64	640.42
95424.8	30691.9	148.32	448.05	2502.66	493.96	493.96	7971.2	1609.08	3217.32	662.58	5328.18	1213.6	650.26	3289.84	647.8
28745.6	47717.8	76.22	486.16	2605.48	644.48	616.92	9924.78	2857.76	3859.65	965.52	8324.37	1008.6	678.14	3778.56	734.72
80687.9	57408.1	130.81	1462.6	3688.8	745.18	1179.78	19756.3	2717.84	8321.94	1159.92	8693.73	1489.12	2955.28	9717	1905.68
62326.3	60643.3	135.96	860.05	3345.36	739.88	952.94	12121.1	2551.42	4705.29	695.79	6109.83	2151.68	2195.96	5687.52	1155.38
28715.4	39836.3	89.61	590.19	2786.74	686.88	615.86	7637.3	1843.34	3645	981.72	7166.88	1762.18	797.04	3591.6	1094.7
99998.6	70191.4	221.45	1351.36	2957.4	752.6	1182.96	13305.1	2620.32	5047.11	648.81	3587.49	3419.4	2036.06	6148.36	1516.18
150555	34634.8	159.65	453.2	3127	782.28	742	11549.8	2139.08	4814.64	341.82	4028.94	820	631.4	4527.22	446.9
29968.7	36125.2	60.77	606.67	2453.9	702.78	545.9	6951.48	2228.12	2690.82	925.83	5448.06	1180.8	467.4	3142.24	810.98
141418	37949.3	99.91	510.88	2405.14	485.48	637.06	7408.34	2338.36	3137.94	864.27	7025.13	1164.4	1157.02	3329.2	672.4
87053.4	77728.9	154.5	745.72	4448.82	1113	743.06	5950.84	2645.76	2672.19	265.68	3431.16	3144.7	2034.42	3188.98	1033.2
77552.2	55364.6	138.02	531.48	2659.54	493.96	664.62	9135.08	2435.88	4549.77	1082.97	13858.3	1039.76	610.9	4428.82	844.6
207063	49364.8	174.07	381.1	5155.84	1241.26	419.76	275.6	2092.44	537.84	405.81	5037.39	740.46	560.88	292.74	455.92
42218.4	72615	150.38	1992.02	3417.44	696.42	1117.24	11379.1	3629.44	4766.04	731.43	6177.87	3891.72	5629.3	6982.3	2506.74
68836.3	88236	156.56	2792.33	3490.58	854.36	1515.8	10975.2	3110.04	4331.88	601.02	4353.75	3772	8933.9	7592.38	3163.56
32505.5	41787.1	33.99	936.27	4049.2	633.88	884.04	11732.1	1852.88	4221.72	1005.21	6180.3	1582.6	2847.86	5520.24	1351.36
53855.8	46899	88.58	600.49	3192.72	716.56	1300.62	11272	1797.76	4642.11	851.31	5039.01	1220.98	1294.78	4983.96	859.36
224954	50452.5	104.03	500.58	6113.02	1110.88	412.34	225.78	2745.4	433.35	287.55	3447.36	604.34	257.48	177.94	583.84
73836.8	72677.8	194.67	1391.53	3353.84	813.02	577.7	9865.42	3668.66	4696.38	896.67	4567.59	2856.88	1439.92	5761.32	1959.8
95791.9	83020.1	155.53	2034.25	2696.64	655.08	1117.24	13713.2	2870.48	6262.92	1024.65	5812.56	2346.02	1754.8	8567.36	2801.94
89165.2	35597.8	76.22	421.27	2904.4	646.6	801.36	9832.56	991.1	3723.57	726.57	3083.67	1122.58	611.72	4634.64	756.86
114005	91919.3	123.6	631.39	3978.18	840.58	530	165.36	2524.92	279.45	117.45	2852.82	1591.62	1403.02	358.34	1027.46
52455.5	66854.2	128.75	563.41	2585.34	558.62	727.16	11554	2322.46	4529.52	861.03	6257.25	1813.02	1049.6	4924.92	1192.28
43711.1	58721.3	139.05	954.81	4309.96	811.96	746.24	12219.7	2710.42	4774.14	1154.25	6036.93	1696.58	1387.44	4970.84	1051.24
114330	58238.3	225.57	1440.97	3354.9	800.3	1314.4	12915	3544.64	4613.76	1471.77	7844.04	1764.64	3588.32	6341.88	1843.36
58174.2	56337.9	117.42	1966.27	2866.24	730.34	1037.74	11457.5	3269.04	4812.21	1243.35	9119.79	3019.24	5466.12	6921.62	2183.66
56280.8	50123.9	151.41	703.49	2499.48	602.08	768.5	9968.24	2233.42	4103.46	396.9	3259.44	1389.08	743.74	4720.74	831.48
85511.2	51562.8	106.09	1166.99	3101.56	698.54	1168.12	15110.3	2213.28	6735.96	754.92	6370.65	1517	3528.46	8115.54	1528.48
139804	56716.9	212.18	3070.43	4289.82	1032.44	1594.24	5480.2	2881.08	2419.47	913.68	5703.21	3056.14	11131.5	6401.74	3516.98
72546.6	44550.6	126.69	650.96	2961.64	619.04	530	6186.16	1939.8	3287.79	1125.09	6156	1795.8	1187.36	2639.58	970.06
42786.2	41088.8	116.39	515	2837.62	554.38	623.28	7574.76	2275.82	3137.94	492.48	4978.26	1787.6	767.52	3442.36	567.44
30059.4	47992.8	99.91	747.78	3941.08	906.3	788.64	11573.1	3441.82	5013.9	1594.08	13247.5	501.02	635.5	4564.94	1179.98
38317.4	47907.4	146.26	841.51	4867.52	1063.18	1105.58	17148.7	2600.18	6652.53	891.81	6107.4	1369.4	1026.64	7625.18	1343.98
55123.3	64835.4	135.96	752.93	3176.82	728.22	562.86	8878.56	2325.64	3578.58	633.42	6185.16	1134.06	951.2	4066.38	1036.48
61382.2	56768.4	173.04	1271.02	3493.76	859.66	780.16	12203.8	3025.24	5276.34	1088.64	8819.28	2105.76	3241.46	6094.24	1735.94
60217.9	69468.4	295.61	1565.6	2695.58	631.76	411.28	1014.42	1665.26	1409.4	557.28	1741.5	2034.42	1316.1	2340.28	2400.96
163419	52602.1	229.69	662.29	4670.36	1134.2	767.44	1316.52	1898.46	1113.75	572.67	4124.52	965.14	1645.74	1206.22	775.72
162942	128307	334.75	3700.79	4067.22	1092.86	2064.88	9022.72	5224.74	3871.8	1398.87	5405.94	3488.28	10635.4	8087.66	5033.16
43452.4	45501.3	256.47	1791.17	3731.2	899.94	1110.88	10624.4	3129.12	5152.41	1436.94	11805.8	4217.26	5881.04	6348.44	2520.68
43722	55340.9	141.11	928.03	2870.48	974.14	899.94	11300.7	3475.74	4914.27	1099.98	6632.28	1310.36	766.7	5735.9	1340.7
87991.7	54053.4	112.27	1506.89	3454.54	772.74	1198.86	12568.4	2095.62	5267.43	895.86	7545.96	1544.88	4093.44	6498.5	1763
92660.4	30279.9	149.35	543.84	3006.16	692.18	753.66	7159.24	1847.58	3124.98	592.11	4113.18	1693.3	790.48	3355.44	530.54
140858	70021.5	309	869.32	4947.02	1260.34	832.1	3735.44	3481.04	1637.01	449.55	4825.98	2092.64	1794.16	2404.24	1011.06
113661	40881.7	192.61	678.77	2638.34	554.38	454.74	3384.58	2228.12	1396.44	329.67	2146.5	1637.54	1501.42	2254.18	814.26
105892	56855	160.68	1145.36	3204.38	715.5	871.32	12116.9	3017.82	4339.17	651.24	4889.97	2044.26	2103.3	5657.18	1402.2
134382	55780.7	179.22	1332.82	3237.24	652.96	862.84	9118.12	2460.26	3964.14	958.23	7814.07	1268.54	4216.44	5430.86	1895.02
30656.6	46379.9	116.39	722.03	2575.8	543.78	516.22	7376.54	3028.42	3246.48	428.49	3778.65	1093.06	695.36	2970.86	1020.08
54352.2	45159.3	141.11	1414.19	3033.72	617.98	1010.18	14188.1	2214.34	5360.58	895.05	6839.64	1826.96	3218.5	6888	1401.38
75878	45298.4	182.31	1042.36	3046.44	639.18	867.08	11064.3	3401.54	5928.39	1218.24	11493.1	2100.02	1441.56	4798.64	1301.34
133761	50606	281.19	1354.45	3995.14	740.94	868.14	14156.3	3131.24	6182.73	491.67	7385.58	1943.4	2795.38	7082.34	1675.26
124331	59302.2	154.5	1194.8	3752.4	843.76	1133.14	12356.4	2824.9	4224.96	461.7	2971.89	2054.92	1354.64	6083.58	1511.26
73444.6	48347.2	89.61	551.05	3088.84	722.92	791.82	10292.6	2725.26	4425.03	740.34	8117.01	689.62	762.6	4712.54	512.5
Single Cells
Patient 4: Healthy
141587	54619.9	165.83	595.34	4726.54	938.1	634.94	2191.02	2282.18	1271.7	508.68	2790.45	1296.42	816.72	1192.28	583.02
116285	57786.1	227.63	2887.09	4550.58	997.46	1691.76	16069.6	2390.3	6798.33	1097.55	7878.87	3422.68	9224.18	10145	3477.62
103276	60524.9	312.09	3368.1	4642.8	1050.46	1771.26	11550.8	4761.52	5936.49	1534.95	11734.5	3282.46	7509.56	9498.88	4670.72
166989	48122.6	221.45	512.94	4676.72	806.66	303.16	182.32	2538.7	542.7	483.57	5277.15	625.66	501.84	213.2	589.58
160531	53537.3	132.87	3496.85	4341.76	786.52	2129.54	20584.1	3224.52	8174.52	1727.73	5945.4	3533.38	9395.56	12915.8	4533.78
78934	81786.1	150.38	1978.63	3980.3	924.32	969.9	11150.1	5301.06	6117.12	1103.22	8535.78	3226.7	2940.52	7117.6	2710.1
93308.9	47812.6	323.42	4489.77	3443.94	911.6	2880.02	10626.5	3334.76	4250.88	848.88	5758.29	4862.6	18141.7	11770.3	5671.94
144819	51150.8	110.21	1027.94	4866.46	1090.74	604.2	7538.72	3252.08	3813.48	929.88	9338.49	883.96	549.4	4226.28	1448.12
71489	68754.6	165.83	2559.55	4744.56	1018.66	1002.76	4068.28	3723.78	2029.05	848.07	5508	3555.52	6369.76	4395.2	2688.78
164569	51232.2	176.13	1164.93	4584.5	1119.36	477	5541.68	3081.42	2378.97	1022.22	6308.28	848.7	396.06	2609.24	1132.42
97502.2	44341.5	152.44	1439.94	2674.38	728.22	1248.68	10199.3	2321.4	3632.85	481.95	2881.17	1916.34	5032.34	6142.62	1870.42
195485	59252.8	310.03	462.47	5255.48	1000.64	280.9	434.6	2982.84	634.23	460.89	4740.12	891.34	423.12	234.52	445.26
125315	41315.4	134.93	471.74	3981.36	969.9	568.16	5327.56	2911.82	2283.39	626.13	3977.91	1002.04	624.84	2346.02	551.04
135515	36836.9	110.21	2842.8	3649.58	757.9	1073.78	645.54	2496.3	1117.8	1206.09	5905.71	2092.64	7728.5	4937.22	3721.98
46618.3	56958	44.29	527.36	2688.16	533.18	642.36	8930.5	2085.02	3859.65	822.15	5559.03	578.1	603.52	4025.38	674.86
141809	37391.1	101.97	2159.91	3357.02	550.14	1795.64	19696.9	4772.12	8156.7	1192.32	13126	2150.04	6534.58	10745.3	2813.42
118899	41582.1	78.28	1740.7	3114.28	610.56	1742.64	21919.7	3363.38	8040.87	569.43	4738.5	1548.98	4479.66	10096.7	1849.1
64357.4	41867.4	0	518.09	2878.96	619.04	568.16	6950.42	1905.88	2916	676.35	5982.66	487.9	320.62	2747	359.16
157305	56819.9	139.05	1116.52	4043.9	750.48	554.38	4019.52	2343.66	2240.46	937.98	5996.43	1742.5	788.02	2339.46	1500.6
92478.1	68100.5	272.95	1985.84	3421.68	897.82	1692.82	16149.1	4154.14	5719.41	680.4	9818.82	3526.82	5968.78	8191.8	2707.64
112279	78464.4	170.98	1852.97	4635.38	1001.7	975.2	5703.86	2537.64	2231.55	983.34	5175.9	359.98	472.32	2396.04	1681.82
35976.4	51764.7	172.01	1218.49	3701.52	1009.12	928.56	15949.8	3853.1	7363.71	1075.68	9877.95	1652.3	1046.32	6964.26	1874.52
206009	149140	306.94	2841.77	5260.78	1371.64	1363.16	7425.3	4659.76	4735.26	1308.96	7232.49	6709.24	3052.86	6247.58	4658.42
42984.5	38328.4	100.94	570.62	3132.3	655.08	701.72	6378.02	2514.32	3428.73	1504.17	10432.8	1563.74	714.22	3019.24	884.78
130638	49846.8	255.44	2283.51	3467.26	866.02	1624.98	9333.3	3107.92	3940.65	1067.58	6566.67	2707.64	8838.78	7274.22	3469.42
108671	75649.4	329.6	3109.57	3164.1	664.62	2166.64	29705.4	2759.18	11849.5	1300.05	6477.57	3920.42	7778.52	15644	3416.94
109741	41581.1	164.8	3263.04	4125.52	869.2	1645.12	17097.8	3728.02	6838.83	1572.21	9672.21	3281.64	9543.98	10968.3	3966.34
78619	43856.4	167.89	2512.17	3744.98	805.6	1757.48	15542.8	1842.28	5458.59	775.98	2371.68	2640.4	8509.14	9912.98	2956.92
63652.7	61958.6	158.62	559.29	2725.26	492.9	538.48	6302.76	1775.5	3075.57	503.01	4375.62	792.94	480.52	3507.14	880.68
100662	40344.1	133.9	2847.95	3288.12	624.34	1420.4	8920.96	2470.86	3843.45	1082.16	6528.6	3261.14	9926.1	7377.54	3475.16
156655	55310	198.79	3800.7	5214.14	1220.06	799.24	550.14	3847.8	635.04	1921.32	6478.38	1024.18	744.56	849.52	2979.06
86010.1	61435.4	217.33	4003.61	4243.18	816.2	2124.24	23215.1	4319.5	8184.24	1741.5	6567.48	5125.82	11747.3	13432.4	5177.48
109875	49054.8	273.98	6194.42	4108.56	873.44	2080.78	1106.64	3710	1478.25	942.03	9131.94	5803.14	21484	11568.6	8257.4
124610	69919.5	214.24	1811.77	4304.66	985.8	659.32	8362.34	3336.88	3623.13	1176.93	5392.98	2053.28	993.84	4389.46	2286.16
50552	35659.6	97.85	235.87	2787.8	704.9	297.86	6410.88	2107.28	2830.95	309.42	5667.57	810.98	466.58	2392.76	642.06
136884	46196.5	121.54	1521.31	4048.14	1049.4	1120.42	11343.1	2209.04	4381.29	528.93	4515.75	1462.88	4482.12	6792.06	2284.52
118453	51614.3	179.22	1257.63	4102.2	728.22	787.58	11001.7	3076.12	5137.83	1058.67	6057.18	1646.56	876.58	6829.78	2091
146768	76399.2	211.15	2961.25	5969.92	1340.9	2121.06	21218	2818.54	8571.42	1061.1	4301.91	3436.62	4743.7	11165.1	2978.24
74373.6	74091	216.3	2496.72	4078.88	801.36	1811.54	22314.1	3455.6	8596.53	1651.59	9293.94	2765.04	7493.16	12139.3	2912.64
112749	40928.1	75.19	2686.24	4359.78	990.04	1718.26	15398.6	1685.4	6012.63	958.23	5561.46	3346.42	10101.6	10411.5	3652.28
154692	41431.8	200.85	1469.81	4259.08	842.7	814.08	6301.7	2884.26	3025.35	954.18	7311.87	533.82	408.36	3399.72	1358.74
161241	46200.7	157.59	1526.46	4261.2	1053.64	818.32	3824.48	2917.12	1535.76	340.2	3509.73	1596.54	6305.8	4141.82	2441.14
166447	51805.9	172.01	2970.52	4988.36	980.5	352.98	299.98	4327.98	677.16	1087.02	7338.6	1580.96	715.04	833.12	2344.38
141249	44017.1	148.32	2378.27	4667.18	987.92	1675.86	19830.5	3523.44	7777.62	767.07	6083.91	1578.5	5361.16	10159.8	2441.14
130364	35347.5	91.67	3509.21	2540.82	540.6	1479.76	11012.3	1885.74	5152.41	797.85	10111.2	2885.58	12787.1	10018.8	3917.14
133916	39429.4	37.08	1505.86	3773.6	696.42	597.84	3875.36	3044.32	2361.15	918.54	5827.14	147.6	200.08	4186.1	2113.14
68259.2	39024.6	225.57	2467.88	3214.98	532.12	1279.42	13525.6	2780.38	4972.59	771.93	4143.15	4320.58	7342.28	8106.52	2756.84
106682	56928.1	221.45	4094.25	4966.1	1155.4	2170.88	14692.7	3249.96	5973.75	1462.86	11575.7	4450.96	15276.6	12192.6	5422.66
144580	35159.1	195.7	2149.61	4002.56	1030.32	1882.56	19239	3978.18	8071.65	924.21	7573.5	1554.72	7301.28	10506.7	2596.12
87980.8	44508.4	189.52	3930.48	4142.48	796.06	2129.54	15549.1	4077.82	6841.26	1602.18	12086	4054.9	12749.4	11444.7	4331.24
78002.4	52868.9	162.74	1513.07	2829.14	610.56	1067.42	12443.3	1814.72	4885.11	990.63	5934.87	2414.08	3742.48	6158.2	1961.44
115988	46532.3	130.81	1890.05	4040.72	749.42	1408.74	14976.7	2735.86	6638.76	1022.22	11642.1	1680.18	6065.54	8383.68	2547.74
110313	59534	246.17	2836.62	4747.74	967.78	957.18	15052	3470.44	6445.98	1427.22	6859.08	3692.46	2053.28	8224.6	3004.48
109636	45536.3	145.23	2666.67	3853.1	862.84	1786.1	13753.5	4399	5202.63	665.01	5762.34	3122.56	10902.7	9511.18	3816.28
61575.4	36689.6	119.48	627.27	2122.12	543.78	674.16	7671.22	3329.46	3841.83	595.35	7114.23	1743.32	897.08	3466.14	922.5
144552	39624.1	106.09	1592.38	4695.8	771.68	849.06	12374.4	1723.56	5367.06	639.09	4555.44	710.12	707.66	7275.04	1972.92
166996	46069.8	104.03	1873.57	5626.48	1235.96	793.94	13119.6	2486.76	5560.65	871.56	4414.5	548.58	650.26	6579.68	1797.44
155248	38798	93.73	261.62	3688.8	834.22	436.72	2665.9	2193.14	1223.1	456.03	5005.8	396.88	521.52	1158.66	254.2
112637	44171.6	169.95	864.17	3161.98	844.82	978.38	7613.98	2668.02	3405.24	654.48	6283.98	1617.04	1885.18	3715.42	1088.14
124497	51466	212.18	4140.6	4512.42	867.08	1092.86	6734.18	3767.24	3445.74	1116.99	6550.47	2624	7499.72	6984.76	4144.28
47770	68628.9	177.16	779.71	2853.52	735.64	892.52	14618.5	4246.36	5758.29	1294.38	7761.42	2586.28	1317.74	6083.58	1340.7
55935.6	34363.9	175.1	640.66	2333.06	499.26	445.2	8013.6	1626.04	3076.38	865.89	4009.5	1736.76	770.8	3602.26	1019.26
157145	73790.2	160.68	1032.06	4838.9	1179.78	506.68	2714.66	2323.52	1391.58	586.44	2863.35	1296.42	701.92	1392.36	1179.98
221485	108286	397.58	2428.74	3690.92	1200.98	1547.6	11826.4	4589.8	4763.61	1331.64	6513.21	3585.04	4463.26	7095.46	3326.74
59692.9	46273.8	40.17	391.4	2757.06	455.8	859.66	11063.2	1723.56	5275.53	1475.82	7227.63	1132.42	700.28	4766.66	1046.32
92581.4	52851.4	140.08	772.5	3630.5	811.96	731.4	9365.1	2775.08	3606.12	723.33	3698.46	3216.86	1804.82	4357.48	1242.3
81793.3	52008.8	164.8	3045.71	3645.34	726.1	1913.3	13774.7	3036.9	5311.17	825.39	7839.18	4042.6	12524.7	11030.6	4618.24
145797	51564.9	153.47	1651.09	4227.28	829.98	719.74	8491.66	2695.58	5000.13	1385.1	6403.05	1034.84	853.62	6765.82	2426.38
80727.4	49686.2	131.84	2147.55	3573.26	768.5	1422.52	13010.4	2700.88	5573.61	1435.32	7017.03	3988.48	6966.72	7886.76	2669.92
146456	49869.5	146.26	728.21	2989.2	756.84	464.28	239.56	1623.92	962.28	353.97	9770.22	782.28	2277.14	1000.4	774.08
126498	43470.1	142.14	3919.15	3589.16	681.58	1741.58	13124.9	3034.78	5512.86	831.06	6373.89	3439.08	11899.8	10649.3	4220.54
144004	36619.6	107.12	2287.63	2799.46	592.54	903.12	430.36	2292.78	724.95	500.58	6424.92	2039.34	8415.66	4319.76	2829
133379	45724.8	160.68	3298.06	3743.92	731.4	2027.78	13379.3	2544	5382.45	903.96	3542.94	3149.62	12058.1	10018.8	3900.74
98696.6	45962.7	148.32	1281.32	3702.58	659.32	871.32	5173.86	3652.76	2506.14	570.24	10415	2120.52	4012.26	4237.76	1764.64
134424	43987.2	209.09	2252.61	3461.96	962.48	1597.42	9782.74	2653.18	3811.86	1134	5073.84	2120.52	6170.5	6921.62	2833.92
115635	56407.9	223.51	3645.17	4617.36	1049.4	1806.24	7237.68	2973.3	3094.2	569.43	6009.39	4642.84	14038.4	8871.58	4655.96
128348	27896.5	103	1719.07	3012.52	779.1	1455.38	16174.5	2518.56	6072.57	902.34	6077.43	1586.7	5264.4	8820.74	2328.8
108394	49144.4	83.43	3722.42	3873.24	851.18	1587.88	15388	3052.8	6211.89	1811.97	7995.51	4274.66	14232.7	12125.3	4674.82
108641	58769.7	159.65	3737.87	4205.02	955.06	2023.54	7980.74	3547.82	3790.8	1030.32	5729.13	4075.4	14483.7	9057.72	5143.04
162786	45975.1	223.51	1383.29	4002.56	958.24	1263.52	15928.6	2182.54	6644.43	624.51	4482.54	298.48	503.48	6991.32	1430.9
134544	46453	133.9	3180.64	3478.92	818.32	1753.24	17694.6	3606.12	6862.32	1433.7	8653.23	3839.24	10352.5	11343.1	4042.6
115168	44804	149.35	2573.97	3682.44	787.58	1550.78	13857.4	3855.22	5039.01	563.76	8690.49	2510.84	8900.28	9137.26	3050.4
158444	32626.3	31.93	855.93	3626.26	802.42	715.5	7238.74	4412.78	3033.45	638.28	6472.71	919.22	2161.52	3858.1	1279.2
151409	55812.6	252.35	2713.02	4100.08	1075.9	1001.7	15133.6	4185.94	6895.53	1459.62	6615.27	2609.24	1940.94	8333.66	2841.3
116805	81267	231.75	3368.1	5486.56	1140.56	1207.34	9217.76	5710.22	6511.59	2243.7	16208.9	3232.44	4247.6	8295.12	4560.84
50700.7	41266.9	101.97	1216.43	3208.62	567.1	1000.64	13383.6	2934.08	5713.74	621.27	7232.49	2356.68	3236.54	6904.4	1589.98
145385	54808.4	249.26	1561.48	3947.44	836.34	1185.08	17356.4	3591.28	6226.47	1519.56	6779.7	3406.28	3337.4	8095.04	1903.22
94080.8	50415.4	140.08	1420.37	3089.9	725.04	1173.42	13910.4	2960.58	5018.76	925.83	4318.11	2865.08	3957.32	7411.98	1713.8
160852	42748.1	114.33	1331.79	3993.02	1010.18	1063.18	4685.2	3173.64	2616.3	629.37	7278.66	933.98	3773.64	3685.08	1637.54
140301	47092.6	42.23	2728.47	4743.5	858.6	1581.52	11152.3	3607.18	4575.69	451.17	6936.84	1622.78	8402.54	8919.96	2906.9
166680	61782.5	258.53	1391.53	6276.26	1234.9	1017.6	6896.36	3243.6	3120.93	1011.69	5925.96	1233.28	761.78	4088.52	1691.66
127625	66058	280.16	2227.89	5133.58	1014.42	1443.72	17478.3	3363.38	6572.34	705.51	8929.44	2551.84	6163.94	9364.4	2477.22
83191.1	61413.8	201.88	1799.41	4821.94	1018.66	892.52	9638.58	2963.76	5001.75	763.02	4659.93	2114.78	1804	5982.72	2526.42
109166	53927.7	191.58	1916.83	3523.44	912.66	749.42	11105.6	4785.9	4968.54	1164.78	7835.94	2597.76	3006.12	7311.94	2778.16
69489	49686.2	75.19	327.54	2532.34	558.62	546.96	5733.54	3377.16	2948.4	578.34	7700.67	947.1	340.3	2924.12	441.98
115370	35294	110.21	3731.69	3456.66	775.92	2335.18	19756.3	2818.54	7799.49	947.7	7143.39	2679.76	14007.2	13967.1	4359.12
100171	54791.9	195.7	2868.55	4203.96	964.6	1908	23234.1	4520.9	9061.47	1088.64	10548.6	3071.72	9680.92	12770.7	3223.42
58322.9	44810.2	125.66	499.55	2323.52	507.74	480.18	4486.98	2181.48	2689.2	902.34	6689.79	695.36	356.7	2345.2	892.98
97232.5	51748.2	228.66	2851.04	2481.46	694.3	1253.98	14429.8	2369.1	6081.48	1118.61	5388.12	2871.64	5687.52	9907.24	4128.7
37800	40684	114.33	737.48	3124.88	658.26	643.42	7963.78	2406.2	3384.99	930.69	7465.77	1665.42	843.78	3394.8	941.36
Single Cells
Patient 5: Healthy
119654	50182.6	100.94	474.83	2789.92	627.52	499.26	9265.46	2748.58	3704.13	788.13	5520.15	1361.2	909.38	3935.18	683.06
94511.8	58975.7	212.18	1083.56	3849.92	817.26	1212.64	11028.2	1725.68	4130.19	669.87	5303.07	3319.36	2686.32	5749.84	1253.78
57970.9	43375.4	92.7	472.77	3218.16	902.06	581.94	4613.12	2369.1	2229.12	883.71	5669.19	920.04	680.6	1936.02	625.66
85162.6	101165	277.07	1492.47	2715.72	680.52	972.02	11176.6	3706.82	5224.5	1014.12	9453.51	2448.52	3713.78	6261.52	1946.68
61817.3	70264.5	224.54	2369	3964.4	829.98	1223.24	10689	2924.54	4874.58	1099.98	6821.01	3267.7	7099.56	7115.14	2962.66
36409	30443.7	25.75	179.22	2158.16	732.46	362.52	5720.82	3243.6	3188.97	1217.43	11681	924.14	491.18	2407.52	579.74
53014.1	50997.4	203.94	1328.7	3027.36	730.34	1121.48	7504.8	1513.68	2767.77	1199.61	6693.84	2587.92	3533.38	4455.06	1953.24
78749.2	41810.8	134.93	382.13	2456.02	409.16	418.7	5160.08	3408.96	2807.46	1044.9	10926.9	604.34	362.44	2105.76	601.06
96447.1	73328.8	213.21	2176.39	4370.38	878.74	1135.26	11727.8	2604.42	4893.21	1670.22	9317.43	3179.96	6326.3	7049.54	3127.48
87041.6	54530.3	229.69	1363.72	2838.68	596.78	928.56	15162.2	2654.24	6069.33	481.95	6237.81	1771.2	2669.1	7144.66	1687.56
85103.8	59124.1	48.41	550.02	3688.8	736.7	596.78	7938.34	2011.88	4024.89	1248.21	9977.58	1077.48	661.74	3606.36	777.36
98064.1	67969.7	172.01	1272.05	3402.6	806.66	713.38	3784.2	3918.82	2022.57	450.36	5861.97	2656.8	3177.5	2897.06	1696.58
84644.3	59686.4	186.43	984.68	3008.28	659.32	650.84	10597.9	2564.14	4548.15	762.21	7034.85	2015.56	1305.44	4555.92	984.82
109964	53565.2	131.84	3457.71	4097.96	781.22	1844.4	11524.3	3624.14	5143.5	1680.75	10858	3717.88	12633.7	10393.5	5035.62
80795.4	77201.6	196.73	828.12	4542.1	917.96	828.92	11045.2	2167.7	4479.3	1173.69	7544.34	2384.56	1271.82	5233.24	1235.74
159055	49756.2	175.1	1072.23	3867.94	821.5	601.02	9391.6	2536.58	3850.74	1263.6	8614.35	2309.12	1922.08	4256.62	1260.34
54227.9	54064.7	61.8	678.77	3538.28	841.64	637.06	8570.1	3175.76	4005.45	1414.26	8637.84	1762.18	1086.5	3967.16	912.66
125656	109033	253.38	2855.16	4114.92	962.48	1120.42	727.16	2191.02	698.22	822.96	5377.59	4237.76	11753.9	5202.9	4059
134349	49346.3	201.88	1295.74	3472.56	731.4	912.66	10304.3	3021	5075.46	1313.01	10982	2565.78	3959.78	5580.1	1964.72
138550	52451.7	173.04	649.93	3028.42	789.7	763.2	11686.5	2511.14	4203.9	470.61	4753.89	1612.94	1580.14	5313.6	1051.24
27891.4	28451.7	71.07	513.97	2352.14	894.64	589.36	7026.74	2194.2	2618.73	660.96	6586.92	1211.14	642.06	3329.2	615
42776.2	41127.9	65.92	409.94	3658.06	775.92	478.06	4842.08	1651.48	2498.85	396.9	5076.27	395.24	1015.98	2586.28	602.7
73752	58752.2	117.42	497.49	2943.62	735.64	888.28	9376.76	2219.64	3728.43	1386.72	4021.65	1849.1	884.78	4257.44	988.92
61533.4	68265.3	216.3	916.7	3107.92	791.82	1014.42	7287.5	1955.7	2681.1	426.87	3650.67	1374.32	1485.02	3617.84	1168.5
46117.7	68911.1	256.47	1301.92	3929.42	827.86	1038.8	13076.2	2017.18	5532.3	1285.47	4854.33	3183.24	1638.36	5812.98	1697.4
84966	66934.6	168.92	3543.2	3468.32	958.24	1685.4	6084.4	2737.98	3189.78	771.12	3409.29	2845.4	13245.5	8613.28	4685.48
72050.2	55124.6	133.9	1488.35	3412.14	807.72	802.42	7772.98	2613.96	4383.72	1517.94	7364.52	2468.2	4533.78	5021.68	2122.98
126802	60784.4	210.12	1755.12	4714.88	1029.26	1234.9	15608.5	4209.26	6082.29	1016.55	6377.94	2811.78	2917.56	8758.42	2512.48
63881.2	51650.4	259.56	853.87	2990.26	818.32	680.52	8158.82	4890.84	3324.24	1504.98	8737.47	2596.12	1269.36	3576.84	1081.58
128674	38534.4	107.12	1873.57	2653.18	516.22	787.58	6365.3	1936.62	3205.98	1377.81	9161.91	2912.64	6818.3	5302.94	2471.48
121619	64931.2	210.12	2259.82	5088	1064.24	1429.94	15373.2	3180	7706.34	1289.52	10679	3335.76	5795.76	8446	2542.82
69792.2	47543.8	169.95	1394.62	2777.2	767.44	1013.36	14509.3	3857.34	6380.37	1029.51	7255.98	1847.46	1366.12	6997.88	1890.1
144026	55713.7	209.09	1076.35	2630.92	665.68	877.68	10776	3014.64	4185.27	547.56	6047.46	2172.18	1999.16	5027.42	1394
99124.2	43550.5	89.61	491.31	2958.46	739.88	572.4	5521.54	2088.2	2869.02	754.11	8385.12	983.18	550.22	2405.88	504.3
84698	81035.2	259.56	4200.34	4162.62	982.62	2115.76	13960.2	2811.12	4760.37	587.25	5243.13	5017.58	17144.6	12527.1	5742.46
117332	50889.2	179.22	547.96	3173.64	649.78	615.86	6709.8	2095.62	2725.65	767.88	5706.45	1513.72	722.42	3220.96	779
124418	41285.5	144.2	965.11	3235.12	725.04	764.26	9499.72	2711.48	4689.9	1461.24	10901	2652.7	2788.82	5192.24	1234.92
101403	57950.9	203.94	1196.86	4016.34	773.8	1052.58	10544.9	3274.34	4530.33	1359.99	7758.99	2584.64	3283.28	5404.62	1508.8
108295	48167.9	206	1456.42	4256.96	866.02	1253.98	9945.98	3435.46	4407.21	1410.21	10952	2736.34	5007.74	5879.4	2203.34
103654	52379.6	216.3	774.56	3086.72	818.32	712.32	9067.24	2712.54	3937.41	1211.76	8841.15	2778.98	1299.7	4169.7	1179.16
156653	35333.1	250.29	654.05	2580.04	647.66	589.36	7584.3	1303.8	3105.54	250.29	2658.42	1775.3	1213.6	3376.76	902
32458.4	54089.4	156.56	959.96	2968	1017.6	1018.66	12794.2	3826.6	5910.57	905.58	6475.14	2036.88	1090.6	5790.84	1559.64
93518	50303.1	123.6	624.18	3318.86	906.3	822.56	7922.44	3022.06	3230.28	1056.24	6691.41	2307.48	949.56	3610.46	1198.84
106557	58467.9	149.35	1133	3324.16	819.38	807.72	9494.42	2651.06	4511.7	1296.81	9262.35	2981.52	2510.84	4749.44	1316.1
89830.4	55152.4	132.87	887.86	3631.56	532.12	984.74	12201.7	2332	4828.41	719.28	8057.88	1646.56	1381.7	5241.44	931.52
109548	61570.3	154.5	798.25	4361.9	852.24	831.04	9600.42	3155.62	4439.61	995.49	8117.01	2113.96	1663.78	4531.32	1122.58
62277.6	51747.2	149.35	633.45	3964.4	962.48	762.14	8799.06	3547.82	4630.77	1324.35	14100.5	1492.4	810.98	4404.22	1024.18
135209	39252.3	120.51	1894.17	2835.5	546.96	1245.5	9005.76	4059.8	3371.22	712.8	7326.45	2748.64	7119.24	6136.06	2494.44
61038.6	53684.6	189.52	681.86	3188.48	813.02	683.7	8878.56	2668.02	4292.19	1692.09	9821.25	1394	743.74	4006.52	876.58
92353	52223.1	233.81	481.01	4128.7	1017.6	498.2	362.52	1993.86	405.81	358.83	4028.94	1989.32	886.42	588.76	1034.84
80640	52357	156.56	2472	3270.1	640.24	1137.38	6255.06	2602.3	2447.01	1143.72	6418.44	3577.66	9588.26	6783.86	3468.6
52207.7	51145.7	142.14	629.33	2264.16	508.8	472.76	5880.88	2835.5	2589.57	973.62	6745.68	979.9	578.92	2291.9	540.38
93324.8	63419.2	147.29	1454.36	4712.76	927.5	992.16	9756.24	3057.04	4659.93	1861.38	8512.29	2830.64	4284.5	5998.3	2012.28
44917.3	20272.5	91.67	557.23	1575.16	607.38	469.58	3071.88	2289.6	1497.69	537.84	3519.45	772.44	476.42	1357.92	485.44
42310	73964.3	293.55	1423.46	3482.1	866.02	978.38	12093.5	2209.04	5183.19	1602.99	6279.93	3238.18	2906.08	5818.72	2181.2
132566	58429.8	230.72	1452.3	4546.34	729.28	1109.82	12996.7	2970.12	5171.85	847.26	9709.47	3133.22	3869.58	6470.62	2081.98
161887	43149.8	189.52	1494.53	4099.02	899.94	996.4	10956.2	2795.22	4614.57	1580.31	8201.25	3308.7	5129.1	6816.66	2100.02
59976	69252.1	191.58	1035.15	3643.22	697.48	816.2	11738.4	3088.84	5651.37	1277.37	10529.2	1940.12	1078.3	4888.84	1276.74
141429	73828.3	218.36	2095.02	3678.2	957.18	1449.02	10455.8	2674.38	4746.6	1330.83	10977.9	3331.66	6933.1	6854.38	2890.5
91782.6	57724.3	206	2080.6	4103.26	888.28	1216.88	11337.8	2577.92	4928.04	1254.69	7176.6	3176.68	6906.86	7929.4	2751.1
104445	43786.3	132.87	1093.86	3068.7	683.7	732.46	7043.7	2650	3397.14	1382.67	7622.1	2537.08	3314.44	4389.46	1833.52
92116.9	65141.3	156.56	783.83	4124.46	815.14	689	10271.4	2477.22	5122.44	1215	8917.29	1017.62	883.14	4538.7	733.08
105950	74839.8	260.59	1954.94	3625.2	797.12	1363.16	16512.7	3710	7034.85	1563.3	8030.34	3342.32	4492.78	8274.62	2316.5
74357.6	54434.5	170.98	1010.43	3781.02	774.86	823.62	6989.64	2576.86	3039.12	1490.4	6733.53	2457.54	2186.12	3989.3	1207.86
121374	50263	145.23	1327.67	4192.3	832.1	1032.44	8529.82	2807.94	3322.62	1057.86	6003.72	2674.02	3914.68	5056.12	2008.18
158994	45719.6	182.31	1095.92	3811.76	672.04	574.52	8531.94	2276.88	3082.05	1359.18	7301.34	2441.14	2865.9	4200.04	1288.22
118117	39375.9	70.04	1074.29	3330.52	770.62	891.46	5699.62	1843.34	2346.57	799.47	5015.52	1594.08	3607.18	3895.82	1619.5
97507.2	73232	224.54	1229.82	3875.36	813.02	1402.38	23360.3	4240	9238.86	1291.95	8503.38	3023.34	2529.7	10332.8	1846.64
81685	43381.5	163.77	2309.26	2998.74	843.76	1447.96	9515.62	2403.02	3991.68	816.48	7720.11	3691.64	8752.68	7331.62	3251.3
39569.9	68576.4	132.87	893.01	4213.5	837.4	818.32	10243.8	2016.12	4238.73	1602.18	6077.43	2747	1679.36	4997.08	1621.96
126480	56187.5	134.93	1473.93	3944.26	942.34	1089.68	10053	2996.62	4196.61	1640.25	10451.4	2540.36	4384.54	5967.14	2321.42
85161.7	40935.3	179.22	691.13	2780.38	537.42	816.2	9700.06	2487.82	4578.93	976.86	7446.33	1708.88	888.88	4403.4	631.4
100062	59889.3	96.82	708.64	4235.76	938.1	622.22	12116.9	2404.08	3869.37	921.78	6199.74	2562.5	1627.7	4765.84	1101.26
62815.2	84862.7	178.19	1027.94	3677.14	934.92	897.82	10841.7	3000.86	4036.23	541.08	3544.56	2787.18	1939.3	5318.52	1353.82
120009	57546.1	149.35	637.57	3252.08	717.62	637.06	7447.56	1492.48	3389.04	1140.48	5274.72	2568.24	1250.5	3885.98	922.5
156145	62972.1	181.28	1335.91	3077.18	632.82	1373.76	19470.1	3813.88	8215.02	844.83	9880.38	3279.18	4209.88	8765.8	1732.66
51352.6	50810.9	93.73	345.05	2882.14	697.48	287.26	172.78	1446.9	417.96	408.24	3490.29	937.26	558.42	274.7	561.7
157328	62024.5	266.77	1094.89	4913.1	1008.06	1060	11301.7	4473.2	5374.35	565.38	6943.32	2651.06	1539.14	5171.74	1641.64
105316	65836.6	269.86	1020.73	4545.28	861.78	820.44	10723	3595.52	4597.56	507.06	7489.26	2669.92	1423.52	5229.96	1348.9
71379	47605.6	70.04	781.77	3440.76	1094.98	829.98	11306	2283.24	4924.8	1043.28	8732.61	1206.22	774.9	4180.36	1316.1
59178.8	46939.2	164.8	3077.64	2995.56	496.08	1159.64	8451.38	1981.14	3396.33	861.84	4514.13	3298.86	9878.54	7572.7	3643.26
85991.6	54032.8	132.87	1303.98	3632.62	683.7	1035.62	12017.2	1511.56	5092.47	795.42	6038.55	2829.82	3299.68	6318.1	1862.22
59908.8	39588.1	66.95	387.28	2151.8	483.36	382.66	6064.26	2559.9	3397.95	997.92	9296.37	690.44	482.98	2624.82	699.46
80987.8	51605.1	161.71	1409.04	3590.22	863.9	875.56	7489.96	2575.8	3655.53	1288.71	9760.5	2636.3	4582.98	5038.08	1920.44
116819	71056.6	220.42	605.64	3985.6	982.62	860.72	8835.1	2619.26	4047.57	1006.83	5703.21	1900.76	1079.94	3873.68	979.9
83723.6	60120.1	176.13	2176.39	3478.92	781.22	1243.38	10308.5	2529.16	4497.93	1364.85	6078.24	3011.86	7767.04	7075.78	3078.28
73404.2	81111.5	247.2	1313.25	3850.98	909.48	1203.1	14134	2642.58	6100.92	938.79	8366.49	2570.7	1792.52	6847	1989.32
85081.9	76881.3	206	1624.31	2736.92	595.72	1419.34	16064.3	2179.36	6185.97	569.43	4129.38	2164.8	4650.22	8564.08	1832.7
99995.3	45207.7	168.92	2116.65	4731.84	877.68	1251.86	12849.3	2689.22	5860.35	1462.86	6710.85	3325.92	6193.46	7833.46	2487.88
54348.8	41918.9	117.42	814.73	3400.48	608.44	684.76	9338.6	3190.6	4650.21	752.49	7895.07	1129.96	788.02	4346	867.56
83176	65160.9	268.83	1086.65	3937.9	858.6	766.38	10600	2162.4	4310.82	870.75	6912.54	2951.18	1963.08	4841.28	1507.16
118369	42735.7	183.34	2066.18	3548.88	668.86	1216.88	9208.22	2799.46	4395.06	836.73	8349.48	3062.7	5808.88	6206.58	2279.6
36052	55692.1	160.68	1455.39	3063.4	731.4	945.52	8253.16	2081.84	3278.07	1260.36	6958.71	2561.68	4108.2	5103.68	1836.8
144035	72058.8	226.6	3101.33	3903.98	850.12	1828.5	5321.2	4020.58	2521.53	788.94	9274.5	4505.08	10549.3	6786.32	4062.28
145504	70905.2	285.31	3017.9	4073.58	979.44	1887.86	13246.8	3661.24	4440.42	815.67	4898.88	4127.88	10395.1	9398.84	3777.74
86796.4	65803.6	151.41	1124.76	3211.8	731.4	844.82	7562.04	2213.28	3804.57	2984.04	9310.95	2181.2	2718.3	4414.88	1687.56
125579	52413.6	267.8	1067.08	3869	816.2	1085.44	11225.4	2082.9	4519.8	1443.42	6642	3134.04	3578.48	5780.18	1771.2
58775.6	56172.1	191.58	2305.14	3678.2	909.48	1206.28	9563.32	2602.3	4440.42	1095.12	6175.44	2979.88	6792.88	6564.92	2888.04
73724.3	52248.8	158.62	778.68	3325.22	810.9	731.4	12501.6	2525.98	5769.63	841.59	9749.16	1449.76	810.98	5262.76	932.34
177059	38725.9	148.32	1194.8	4380.98	860.72	1009.12	10710.2	3052.8	4932.09	994.68	9257.49	2254.18	3680.98	5833.48	1284.94
Single Cells
Patient 6: Healthy
75493.3	49110.4	141.11	502.64	3086.72	718.68	793.94	9460.5	2350.02	4004.64	665.01	9289.08	1442.38	917.58	3962.24	737.18
19918.1	42566.8	124.63	631.39	2687.1	823.62	572.4	4295.12	3320.98	3145.23	1489.59	14645.6	1138.98	724.06	2232.04	940.54
93482.8	54580.7	264.71	1837.52	3178.94	746.24	1319.7	12320.4	2345.78	4894.02	929.07	5424.57	2868.36	4599.38	7074.14	2227.12
112878	53855.6	147.29	1917.86	3781.02	849.06	1305.92	13787.4	1755.36	4915.08	931.5	7307.82	1555.54	6907.68	8390.24	2346.84
58207	59068.4	203.94	1151.54	3055.98	690.06	1220.06	16046.3	2704.06	6255.63	888.57	6740.01	2794.56	1562.92	6992.96	1270.18
67932.5	40802.4	82.4	249.26	1904.82	654.02	573.46	5597.86	2654.24	2603.34	991.44	6245.91	396.06	414.92	2390.3	538.74
54030.5	44728.8	88.58	756.02	2275.82	567.1	736.7	10806.7	3061.28	4393.44	1095.93	8236.89	1505.52	687.16	4640.38	946.28
59394.7	67214.7	247.2	2037.34	3079.3	644.48	1455.38	7770.86	3080.36	3224.61	916.92	7585.65	2351.76	6871.6	5845.78	3034.82
98965.4	40946.6	145.23	1281.32	2620.32	481.24	1047.28	8143.98	2276.88	3717.9	859.41	4530.33	2840.48	3494.02	5353.78	1944.22
89797.7	42826.4	158.62	3621.48	4443.52	1021.84	1668.44	9073.6	1599.54	3275.64	1018.17	7861.05	3835.96	13159.4	9127.42	4427.18
146258	48043.3	80.34	1210.25	3327.34	822.56	997.46	10604.2	2359.56	4537.62	763.02	9141.66	2730.6	3785.94	6017.98	1876.98
192609	75568	279.13	3167.25	3689.86	749.42	1151.16	3581.74	3252.08	1612.71	553.23	4296.24	4113.12	10762.5	6062.26	4008.98
102426	64526.4	130.81	1059.87	3501.18	700.66	843.76	9339.66	2080.78	4396.68	1864.62	8084.61	2428.02	2397.68	4748.62	1309.54
29025.4	36282.8	138.02	680.83	2452.84	516.22	580.88	7371.24	2788.86	4070.25	1867.05	11787.1	1432.54	819.18	3592.42	881.5
56957	48782.9	133.9	621.09	2779.32	908.42	983.68	8293.44	2428.46	3513.78	1138.86	8206.11	1673.62	969.24	3414.48	943.82
141482	37226.3	188.49	551.05	2138.02	563.92	456.86	2345.78	3697.28	1624.86	1391.58	12676.5	1817.12	696.18	1215.24	1066
165444	51727.6	202.91	667.44	2782.5	699.6	642.36	8045.4	1332.42	3566.43	355.59	2254.23	2068.04	783.1	3777.74	958.58
45811.1	29196.4	78.28	421.27	2536.58	511.98	293.62	4276.04	2562.02	2299.59	893.43	9699.75	831.48	592.86	1796.62	613.36
96055.7	57370	200.85	711.73	2585.34	436.72	887.22	13177.9	2668.02	4642.11	631.8	4242.78	2860.16	1858.12	5922.04	1348.08
52746.1	68308.6	202.91	2657.4	3272.22	583	1734.16	13230.9	3156.68	5184	1301.67	5785.02	4358.3	9747.34	9627.62	3648.18
90762	56121.6	111.24	1773.66	3558.42	739.88	1293.2	16114.1	2982.84	5861.16	1299.24	6094.44	3999.96	5990.1	8350.06	2448.52
85719.5	52610.3	141.11	605.64	2740.1	966.72	691.12	8663.38	2159.22	4189.32	878.04	7315.11	633.86	586.3	3472.7	630.58
121789	55833.2	168.92	1429.64	4038.6	871.32	1102.4	16351.6	4390.52	5448.06	1714.77	11673.7	2418.18	3009.4	7268.48	1574.4
53713	38519.9	92.7	437.75	2371.22	486.54	233.2	4980.94	2212.22	2856.87	1011.69	8580.33	920.04	505.94	2259.92	961.86
66638.9	56759.2	196.73	476.89	2139.08	523.64	293.62	100.7	1596.36	289.98	362.88	2404.08	1863.86	734.72	200.08	452.64
116856	38985.5	48.41	1954.94	3238.3	603.14	1191.44	7386.08	2272.64	3017.25	1931.04	7303.77	2679.76	7607.14	5972.88	2987.26
103120	61037.8	138.02	962.02	2674.38	577.7	660.38	10593.6	2487.82	4625.1	1637.82	6120.36	2904.44	1658.04	4550.18	1325.94
67978.7	38350	117.42	691.13	2889.56	833.16	869.2	9909.94	3286	4862.43	852.93	8345.43	1552.26	1142.26	4910.98	1164.4
55698.7	123937	261.62	1681.99	3404.72	765.32	944.46	7129.56	2182.54	3286.98	771.12	4635.63	1746.6	1004.5	3603.08	2036.06
60119.6	36844.1	132.87	946.57	3312.5	1017.6	356.16	9479.58	4126.58	4677.75	2304.45	17080.5	1393.18	816.72	4081.14	1378.42
81269.2	47090.6	29.87	629.33	2627.74	585.12	339.2	6173.44	2100.92	2511	661.77	5458.59	463.3	882.32	3112.72	679.78
51119	73199	228.66	1177.29	2469.8	626.46	496.08	395.38	2981.78	1501.74	869.94	7300.53	725.7	392.78	1975.38	1908.14
131076	49706.8	211.15	1147.42	2770.84	727.16	1071.66	8334.78	2174.06	3939.84	1191.51	6021.54	2302.56	3216.04	4846.2	1615.4
116018	52195.2	142.14	2373.12	3952.74	832.1	1306.98	9507.14	2474.04	3724.38	1448.28	7639.92	3695.74	8325.46	6692.02	2941.34
63516.6	41402.9	111.24	517.06	2774.02	644.48	517.28	8563.74	2793.1	4599.18	1425.6	11223.4	1166.04	758.5	3430.88	796.22
121111	55100.9	148.32	2882.97	3340.06	826.8	1336.66	10356.2	2017.18	4026.51	1502.55	5779.35	2824.08	9369.32	8080.28	3695.74
48574.7	47436.7	120.51	456.29	2379.7	416.58	549.08	5791.84	2343.66	3127.41	928.26	7142.58	1048.78	626.48	2832.28	812.62
24711.1	33362.7	140.08	558.26	2215.4	591.48	485.48	4335.4	3385.64	2467.26	1298.43	7950.15	1252.14	660.92	2033.6	796.22
55015.8	58480.3	215.27	676.71	2727.38	655.08	951.88	9099.04	2279	3499.2	1051.38	7050.24	1911.42	1297.24	4204.96	961.86
63811.4	38887.7	74.16	368.74	2574.74	544.84	271.36	2811.12	2110.46	1502.55	387.18	6202.17	909.38	718.32	1665.42	720.78
41972.3	62208.9	165.83	888.89	2602.3	442.02	872.38	8346.44	3322.04	3291.84	533.79	3894.48	3160.28	1501.42	3617.84	1492.4
97120.8	60396.1	233.81	1271.02	2750.7	730.34	896.76	7569.46	1856.06	3542.94	1097.55	4192.56	2015.56	3419.4	4817.5	2064.76
35558.9	35953.2	148.32	714.82	3130.18	1025.02	826.8	10231.1	3353.84	4727.16	1329.21	10850.8	1160.3	824.1	4868.34	1343.98
86046.2	47382.1	146.26	478.95	2530.22	492.9	568.16	7921.38	2152.86	3293.46	790.56	6847.74	1192.28	668.3	3211.12	644.52
17749.2	31508.7	110.21	721	2390.3	616.92	535.3	5572.42	3351.72	2830.95	1341.36	7501.41	984.82	560.06	2428.84	960.22
37743.7	29621.8	17.51	602.55	2658.48	645.54	584.06	6644.08	2493.12	3026.16	1174.5	8240.13	957.76	551.04	2875.74	861
113787	93602.3	192.61	1669.63	3618.84	1013.36	947.64	11529.6	3917.76	4820.31	758.97	4970.16	3553.88	1698.22	6298.42	2532.16
74220.7	37064.6	165.83	547.96	2695.58	874.5	720.8	6899.54	2326.7	3708.18	1291.14	12730	1628.52	813.44	3171.76	1175.06
64670.8	25537.8	40.17	408.91	1987.5	542.72	763.2	5253.36	2131.66	2161.89	547.56	4112.37	1485.84	783.92	2473.12	905.28
26049.2	31203.8	74.16	665.38	2709.36	891.46	511.98	6076.98	2046.86	2851.2	710.37	7389.63	1279.2	729.8	3066.8	1061.08
154368	39758	106.09	1093.86	2330.94	548.02	902.06	7257.82	1253.98	3005.91	774.36	3342.87	1918.8	2843.76	4400.94	1282.48
115148	86385.1	156.56	1469.81	3296.6	835.28	894.64	12593.9	3129.12	5232.6	1394.01	3593.97	2260.74	1322.66	6291.04	1886
50083.3	35456.7	110.21	591.22	2035.2	482.3	454.74	7394.56	2236.6	3330.72	1032.75	11547.4	1252.14	865.92	3330.02	777.36
92368.1	44230.3	194.67	1014.55	3177.88	743.06	1071.66	10048.8	2510.08	3684.69	1166.4	6523.74	3020.06	3175.04	5423.48	1479.28
173043	61791.8	288.4	2429.77	4206.08	1072.72	941.28	8710.02	2870.48	4164.21	1121.04	5712.12	3182.42	3783.48	6471.44	3052.86
104123	57315.4	160.68	1226.73	2286.42	400.68	1274.12	24735.1	2099.86	8534.16	767.07	4566.78	2162.34	1567.84	10811.7	1299.7
107916	54101.8	189.52	1052.66	2958.46	626.46	961.42	12007.7	1538.06	4727.97	1121.85	4985.55	2159.88	2633.02	5727.7	1530.12
119157	64048.5	237.93	3148.71	3662.3	846.94	1601.66	13980.3	2748.58	5858.73	932.31	7404.21	4492.78	10391.9	9642.38	3932.72
28358.4	48642.8	190.55	599.46	2790.98	691.12	655.08	7671.22	2942.56	3939.03	1095.12	10528.4	1481.74	999.58	4004.88	1061.9
79545.5	47610.7	188.49	1356.51	2093.5	586.18	836.34	6848.66	1647.24	2510.19	525.69	2686.77	1788.42	3358.72	4245.14	1612.94
39049.9	32513	85.49	341.96	952.94	284.08	500.32	4243.18	1847.58	2097.9	417.15	3618.27	757.68	455.92	2077.06	473.14
30954.8	35195.1	67.98	607.7	2324.58	1041.98	714.44	5354.06	2984.96	3650.67	1364.04	13889.9	1186.54	605.16	2601.86	1153.74
57500.5	30662.1	80.34	420.24	2492.06	530	437.78	3102.62	2780.38	2553.93	867.51	8776.35	852.8	516.6	1405.48	916.76
68445.7	43555.6	90.64	634.48	1976.9	373.12	505.62	7582.18	2499.48	4134.24	1132.38	10242.5	738	283.72	3232.44	1040.58
143221	41306.1	129.78	4451.66	3355.96	655.08	2107.28	9850.58	1758.54	3229.47	864.27	6671.97	4757.64	17540.6	10825.6	5801.5
116804	46052.3	270.89	1239.09	2708.3	610.56	783.34	10296.8	2504.78	3686.31	700.65	4105.89	2018.84	2526.42	5389.04	1480.92
54574.8	101838	213.21	1526.46	2789.92	735.64	504.56	592.54	2940.44	1015.74	966.33	4993.65	2611.7	2683.04	1745.78	1740.86
81040.7	32654.1	107.12	437.75	1952.52	446.26	507.74	6214.78	2744.34	3131.46	1254.69	8112.15	1203.76	669.12	2956.92	804.42
50624.3	50303.1	165.83	770.44	2567.32	654.02	703.84	9865.42	3636.86	3824.82	1333.26	8415.9	1285.76	794.58	4159.04	1110.28
97104.8	44737	123.6	321.36	2053.22	535.3	331.78	4408.54	1690.7	1979.64	468.99	4927.23	501.02	329.64	1661.32	464.12
121813	58025.1	158.62	1772.63	3339	801.36	1144.8	12649	2538.7	5247.99	913.68	7406.64	3094.68	6359.92	7322.6	2668.28
69076.6	104023	270.89	2418.44	3290.24	928.56	1054.7	14303.6	3050.68	5526.63	1208.52	5592.24	3635.06	2477.22	7758.84	2808.5
52646.2	29034.7	164.8	568.56	2460.26	669.92	659.32	5903.14	2654.24	3140.37	1189.08	10270	1775.3	1025	2984.8	658.46
58905	39562.3	76.22	670.53	3032.66	673.1	803.48	8576.46	2470.86	3728.43	1189.89	9119.79	1097.16	819.18	3909.76	976.62
91494.5	41934.4	144.2	2907.69	3040.08	789.7	1386.48	9024.84	1769.14	3655.53	703.08	3198.69	3242.28	9683.38	7565.32	3265.24
55507.2	33652.2	65.92	390.37	2788.86	738.82	434.6	3737.56	3547.82	1814.4	621.27	8367.3	1398.1	855.26	1535.86	1092.24
184514	73886	313.12	6871.13	4075.7	896.76	2655.3	3399.42	3255.26	1135.62	430.92	4397.49	6282.02	26222	12623.1	8357.44
90362.2	32935.3	158.62	378.01	2038.38	675.22	468.52	5955.08	2108.34	3102.3	751.68	6718.14	1051.24	568.26	2912.64	537.1
147213	29626.9	69.01	3787.31	2880.02	598.9	1646.18	9958.7	1579.4	3895.29	1027.89	5022	2761.76	13844.9	9896.58	4537.06
76468.6	45176.8	145.23	670.53	2418.92	522.58	648.72	10896.8	2341.54	4939.38	1249.02	8966.7	1249.68	869.2	5161.9	1068.46
58152.4	89089.8	270.89	6490.03	3724.84	850.12	2658.48	8195.92	2749.64	3276.45	385.56	3001.86	5840.86	25309.3	13905.6	8317.26
88510	43016.9	77.25	2584.27	2859.88	596.78	1210.52	10309.6	2417.86	4433.13	1150.2	8108.91	2860.16	8653.46	8186.88	3120.92
38725.7	30144	139.05	690.1	2915	827.86	498.2	5651.92	3367.62	2941.11	1611.09	13268.6	1145.54	556.78	2613.34	974.16
90566.3	41148.5	119.48	816.79	2825.96	620.1	829.98	9388.42	2245.08	4089.69	1183.41	9054.99	1822.86	1496.5	4560.84	1132.42
113025	37641.3	196.73	2160.94	3124.88	696.42	1118.3	10523.7	2633.04	4555.44	1491.21	9169.2	2623.18	7277.5	6782.22	2555.94
106269	39537.6	139.05	1994.08	3196.96	662.5	1005.94	9683.1	2688.16	3568.05	610.74	5388.93	2227.12	6385.34	6460.78	2302.56
176640	59710.1	210.12	775.59	3111.1	849.06	473.82	1693.88	2238.72	1033.56	549.18	3952.8	1421.06	722.42	767.52	621.56
77883.1	35094.2	9.27	519.12	1610.14	303.16	276.66	2794.16	2294.9	1043.28	352.35	3423.06	355.06	682.24	1090.6	490.36
65764.4	30527.1	45.32	323.42	2046.86	524.7	283.02	2655.3	3027.36	2092.23	1223.91	10585.1	791.3	259.12	1167.68	703.56
48653.6	29482.7	24.72	401.7	2149.68	526.82	524.7	4072.52	2069.12	1988.55	1318.68	7951.77	343.58	415.74	1665.42	564.98
107224	47291.4	181.28	2010.56	3336.88	851.18	1175.54	8608.26	3034.78	3902.58	903.96	8678.34	2520.68	5590.76	5643.24	1882.72
69296.6	42951	114.33	790.01	2512.2	556.5	678.4	11802	2838.68	4399.92	1095.93	4786.29	1913.06	996.3	4938.04	1070.92
52978.8	47345	161.71	677.74	3102.62	542.72	800.3	12791	2560.96	5299.83	1070.01	4541.67	1381.7	632.22	5656.36	779.82
58501.8	42526.6	122.57	459.38	2735.86	615.86	786.52	8056	2451.78	4037.04	1634.58	11014.4	1552.26	821.64	3608.82	1038.12
77343.8	54899	116.39	1535.73	3608.24	999.58	968.84	9442.48	2477.22	4208.76	1176.12	5523.39	2782.26	4653.5	5899.9	2167.26
20984	35581.3	159.65	638.6	2446.48	1028.2	862.84	5694.32	2911.82	3747.87	1987.74	12721	945.46	520.7	2625.64	1207.04
89896	63181.2	155.53	2754.22	2829.14	695.36	1631.34	10407.1	2375.46	3965.76	924.21	4778.19	3882.7	10315.6	8413.2	3485
51739.8	29475.5	97.85	546.93	2139.08	810.9	451.56	3776.78	2833.38	2561.22	1173.69	9163.53	859.36	535.46	1719.54	792.94
104252	54458.2	128.75	1502.77	3237.24	763.2	1078.02	8080.38	2235.54	4039.47	1611.9	9568.53	3194.72	5731.8	5489.9	2308.3
66806	45607.4	97.85	559.29	2646.82	604.2	519.4	7298.1	3092.02	3827.25	1333.26	10269.2	1016.8	625.66	3019.24	1188.18
Single Cells
Patient 7: Healthy
99198.1	54198.6	149.35	2226.86	3825.54	731.4	1669.5	13785.3	4167.92	5746.95	1136.43	11425	3264.42	6647.74	7926.94	3003.66
129204	48466.7	182.31	914.64	3139.72	838.46	982.62	11498.9	2325.64	6137.37	671.49	8558.46	1800.72	1342.34	5915.48	901.18
107251	47920.8	248.23	913.61	2799.46	782.28	841.64	11968.5	2822.78	5635.98	1185.03	9275.31	2779.8	1538.32	5321.8	1305.44
158225	52370.3	278.1	1659.33	3910.34	868.14	1215.82	7589.6	3498	3437.64	613.17	5433.48	2594.48	6065.54	5685.06	2442.78
127581	45470.4	190.55	467.62	2032.02	505.62	548.02	8885.98	1310.16	3197.88	161.19	1734.21	1339.88	973.34	3687.54	656
221831	206905	598.43	2587.36	4247.42	1330.3	1971.6	9802.88	5432.5	5056.02	2003.94	18289.8	7445.6	6387.8	5926.96	3967.16
107207	62086.3	231.75	566.5	2695.58	731.4	642.36	6011.26	1817.9	2899.8	522.45	3197.07	2482.96	1136.52	3338.22	954.48
116640	38896.9	188.49	229.69	1968.42	573.46	399.62	21.2	1665.26	434.16	366.12	3203.55	678.14	492.82	214.02	436.24
80013.4	23974.3	179.22	895.07	2191.02	556.5	1172.36	22833.5	1333.48	8190.72	1035.99	5154.03	1799.08	1061.08	9433.28	1131.6
100006	43114.8	210.12	742.63	3035.84	764.26	752.6	8667.62	2161.34	3470.85	537.03	4138.29	2089.36	1506.34	4192.66	994.66
111629	32789	122.57	238.96	1874.08	375.24	474.88	4818.76	1594.24	2158.65	535.41	3104.73	1351.36	831.48	2288.62	538.74
37837	53045	79.31	644.78	2650	609.5	503.5	6004.9	3620.96	3102.3	673.92	8261.19	877.4	470.68	2488.7	899.54
120225	29670.2	108.15	508.82	2053.22	418.7	475.94	5610.58	1579.4	2719.98	824.58	6484.05	1507.98	808.52	2665	699.46
37090.2	34570.9	151.41	795.16	2005.52	584.06	446.26	5735.66	1768.08	3074.76	1159.11	4922.37	2050	980.72	2830.64	1350.54
112316	37116.1	149.35	2953.01	4364.02	903.12	1800.94	9788.04	2736.92	4470.39	1432.08	8553.6	3562.08	11322.6	8594.42	3877.78
130262	39330.6	224.54	733.36	2489.94	624.34	491.84	8138.68	1653.6	3333.96	768.69	4246.02	1970.46	1020.08	3432.52	1079.12
29711.6	54381.9	132.87	848.72	1703.42	560.74	707.02	7462.4	2380.76	2856.06	676.35	3280.5	2038.52	1028.28	3601.44	1845.82
165030	63256.4	333.72	419.21	4884.48	987.92	462.16	729.28	3638.98	976.86	554.04	7344.27	1804	981.54	917.58	743.74
85879.9	60230.3	196.73	2292.78	3116.4	808.78	1219	12615.1	2417.86	5951.07	914.49	5895.18	4387	7857.24	8648.54	3026.62
152378	53550.7	200.85	591.22	2994.5	729.28	419.76	4240	2464.5	2237.22	260.82	4247.64	555.14	724.06	2143.48	497.74
70070.3	96975.5	245.14	2361.79	3122.76	902.06	756.84	465.34	2599.12	1061.91	1097.55	4755.51	2913.46	3026.62	3735.1	3482.54
126070	34817.1	158.62	427.45	2968	595.72	749.42	6177.68	1382.24	2970.27	740.34	3765.69	1268.54	956.94	3226.7	775.72
27254.6	52890.5	110.21	900.22	3546.76	1021.84	960.36	11926.1	2223.88	4904.55	1125.09	5985.09	1472.72	917.58	5129.1	1107.82
129913	30055.4	167.89	1136.09	3434.4	723.98	1404.5	25813.1	1841.22	10017.3	1402.92	8076.51	1020.9	1110.28	10415.6	775.72
68404.6	42735.7	165.83	862.11	1805.18	791.82	503.5	189.74	1194.62	527.31	467.37	2496.42	2528.06	992.2	961.04	1493.22
140402	76901.9	243.08	1044.42	4744.56	1055.76	1275.18	10253.4	2435.88	5316.84	1227.15	8468.55	1951.6	2499.36	5644.88	1375.14
17110.8	79794.1	243.08	2212.44	3609.3	930.68	838.46	11424.7	4046.02	5759.91	1175.31	6070.14	2998.74	1646.56	7222.56	3321.82
46621.7	86327.4	245.14	1067.08	3032.66	740.94	1066.36	16997.1	4115.98	7895.07	1206.9	10334	2647.78	1408.76	7390.66	1307.08
29647	37831.9	143.17	586.07	2273.7	691.12	548.02	9403.26	2203.74	3890.43	1709.1	7453.62	550.22	333.74	3653.1	912.66
140009	51020	70.04	2854.13	2732.68	589.36	1546.54	13151.4	3978.18	5491.8	570.24	6722.19	2985.62	10199.2	9434.1	3635.88
80099	22775.4	60.77	737.48	2158.16	519.4	722.92	6185.1	2286.42	2833.38	1808.73	9759.69	609.26	507.58	2492.8	582.2
128012	25588.3	150.38	450.11	2284.3	465.34	399.62	6765.98	1260.34	2617.11	586.44	5978.61	1218.52	650.26	2434.58	777.36
103585	42517.4	255.44	568.56	2662.72	560.74	889.34	7130.62	2411.5	3018.87	1067.58	7379.91	2453.44	1219.34	3292.3	1061.08
52936.8	42463.8	192.61	679.8	2426.34	536.36	634.94	7828.1	2971.18	2947.59	499.77	3479.76	2139.38	1153.74	3600.62	1039.76
107937	63606.6	201.88	5385.87	3839.32	999.58	2328.82	9641.76	4300.42	4038.66	693.36	7040.52	6167.22	20096.6	12559.9	6936.38
131185	61177.9	203.94	673.62	3889.14	864.96	782.28	9192.32	2618.2	4263.03	681.21	6186.78	1489.94	844.6	4742.88	1340.7
67176.5	26795.5	129.78	577.83	2068.06	604.2	513.04	3514.96	1493.54	1526.04	846.45	4406.4	885.6	421.48	2086.9	1004.5
36013.3	39831.1	187.46	704.52	2423.16	871.32	1203.1	9014.24	2422.1	3833.73	1292.76	6934.41	1169.32	966.78	3671.96	1179.98
78648.4	47877.5	98.88	500.58	1812.6	566.04	562.86	5799.26	1950.4	2499.66	443.88	3572.91	660.92	437.06	2937.24	693.72
107466	101947	238.96	1058.84	3871.12	855.42	795	9935.38	3265.86	4280.85	475.47	4781.43	1844.18	1009.42	5159.44	1785.96
226218	148698	448.05	2803.66	3417.44	991.1	1689.64	7533.42	4130.82	3402	678.78	3934.98	6517.36	7233.22	6372.22	3766.26
132954	56438.8	139.05	387.28	3848.86	966.72	425.06	111.3	2978.6	867.51	488.43	4956.39	883.96	383.76	411.64	567.44
105833	36686.5	151.41	502.64	1845.46	530	326.48	4273.92	1425.7	1992.6	429.3	4254.12	1395.64	756.04	2218.1	967.6
130950	34037.4	183.34	594.31	3410.02	815.14	537.42	7991.34	2192.08	3329.91	903.96	6417.63	1756.44	1179.16	3043.84	417.38
54610.9	62445.8	288.4	996.01	2123.18	555.44	800.3	7041.58	1450.08	2557.98	458.46	3159	3019.24	1569.48	3315.26	1345.62
124078	51112.7	129.78	1336.94	3239.36	834.22	923.26	11893.2	3297.66	4779.81	878.85	7741.17	2054.92	3734.28	6013.06	1848.28
58509.4	36465.1	109.18	437.75	2104.1	347.68	550.14	5714.46	1486.12	2817.99	947.7	4678.56	1748.24	849.52	2804.4	1134.06
143564	37638.3	163.77	1061.93	4369.32	1001.7	1107.7	10155.9	2447.54	4086.45	1075.68	6610.41	1460.42	2328.8	4639.56	1208.68
123651	38747.6	267.8	657.14	2279	541.66	626.46	7664.86	2147.56	3540.51	581.58	4166.64	1669.52	796.22	3224.24	758.5
120007	38567.3	180.25	638.6	2515.38	571.34	760.02	7365.94	1522.16	2869.02	746.82	7053.48	1908.14	988.92	3444	912.66
91766.6	53231.4	158.62	2666.67	4701.1	1027.14	1699.18	12203.8	2675.44	5330.61	1106.46	9313.38	3380.04	8821.56	8320.54	2862.62
145646	50639.9	236.9	750.87	3994.08	1062.12	695.36	545.9	2501.6	1251.45	678.78	5089.23	888.06	601.06	1818.76	1274.28
63355.3	51092.1	144.2	745.72	2859.88	733.52	684.76	9099.04	2797.34	4514.94	639.09	5294.16	2523.14	1792.52	4069.66	1140.62
61346	56474.9	94.76	1070.17	3704.7	739.88	821.5	7928.8	2218.58	3934.98	997.11	9563.67	1742.5	1623.6	4049.16	1141.44
76987.7	61817.5	239.99	984.68	2130.6	652.96	563.92	4061.92	2366.98	1836.27	518.4	3542.13	3184.06	1667.88	2546.92	1289.86
85011.4	43871.8	229.69	723.06	2527.04	613.74	768.5	8703.66	2872.6	4103.46	771.12	8305.74	2083.62	1111.92	4581.34	1014.34
40509	68964.7	124.63	460.41	2993.44	683.7	598.9	8090.98	3204.38	3643.38	920.97	8906.76	698.64	690.44	3658.84	963.5
118497	29394.1	182.31	335.78	1928.14	555.44	274.54	4649.16	1553.96	2099.52	721.71	6792.66	1135.7	620.74	2170.54	595.32
64155	45235.5	166.86	1254.54	2820.66	595.72	765.32	6771.28	1798.82	3041.55	481.95	3376.89	1963.08	3391.52	4346.82	1490.76
129582	53706.3	157.59	1174.2	3967.58	901	984.74	11839.1	3155.62	4979.88	1605.42	11136.7	2163.98	3079.1	6450.94	1712.98
126517	40288.4	236.9	524.27	3155.62	735.64	905.24	8415.34	1653.6	3886.38	1201.23	4881.87	1908.14	1231.64	3752.32	607.62
122946	37975.1	114.33	1117.55	2560.96	655.08	924.32	6962.08	2021.42	3353.4	1353.51	6016.68	1397.28	3094.68	3926.98	1166.86
60783.2	41731.5	126.69	697.31	2207.98	692.18	468.52	7626.7	3959.1	3208.41	635.04	5713.74	903.64	720.78	3489.92	733.9
110117	34049.7	121.54	725.12	3032.66	617.98	760.02	7987.1	2758.12	3589.92	1155.06	6821.82	1534.22	872.48	3444	831.48
92830.9	58150.7	175.1	621.09	3021	522.58	577.7	5937.06	2470.86	2941.11	1111.32	8173.71	2479.68	1269.36	2940.52	1009.42
78539.2	60282.8	219.39	2121.8	3358.08	843.76	1455.38	11401.4	2323.52	4780.62	848.88	8259.57	2956.1	7498.9	7332.44	2977.42
157507	35051.9	175.1	508.82	2304.44	601.02	561.8	8607.2	1884.68	3526.74	993.06	6492.15	1020.9	680.6	3653.92	477.24
66805.2	50461.8	160.68	1923.01	3548.88	762.14	1194.62	10619.1	2814.3	4403.97	1437.75	10303.2	2786.36	6087.68	6773.2	2487.88
101126	45201.6	119.48	437.75	3194.84	704.9	596.78	7194.22	1304.86	3515.4	794.61	5187.24	297.66	426.4	3175.04	450.18
192570	55293.5	219.39	423.33	3247.84	939.16	550.14	2140.14	3411.08	1142.1	264.06	4708.53	1003.68	406.72	872.48	535.46
55384.6	44249.8	141.11	991.89	3031.6	532.12	676.28	9905.7	1982.2	4487.4	1423.98	9055.8	1756.44	922.5	3989.3	1095.52
57157.8	31107	51.5	369.77	1215.82	486.54	395.38	4223.04	1441.6	1833.84	358.83	5326.56	281.26	177.94	1707.24	510.86
113917	50667.8	151.41	722.03	3493.76	782.28	920.08	11386.5	2535.52	4888.35	1149.39	7782.48	2375.54	1935.2	5420.2	1220.98
137042	54439.6	151.41	851.81	3913.52	806.66	833.16	6316.54	2605.48	3148.47	611.55	5340.33	1572.76	1438.28	3053.68	974.16
118747	41561.5	160.68	757.05	3208.62	705.96	858.6	9344.96	1698.12	3834.54	863.46	1901.07	1403.84	697	4182.82	608.44
113682	46139.9	95.79	624.18	2067	749.42	788.64	6428.9	1507.32	2893.32	959.04	4147.2	1550.62	1175.88	3076.64	855.26
56469.8	20443.4	89.61	503.67	1648.3	405.98	420.82	4719.12	1717.2	2578.23	664.2	6705.99	884.78	594.5	2050.82	605.16
34569.4	53590.9	180.25	905.37	3079.3	980.5	912.66	8385.66	2860.94	3917.97	1221.48	10632.1	1560.46	877.4	3963.06	945.46
60309.5	109956	248.23	3657.53	4039.66	964.6	1881.5	11222.2	2669.08	4346.46	572.67	4141.53	4807.66	12901.9	9404.58	4582.98
90730.1	46076	301.79	760.14	2211.16	567.1	946.58	12146.5	2465.56	5592.24	845.64	6554.52	1958.98	1044.68	5439.06	1099.62
89666.6	55303.8	127.72	399.64	2938.32	771.68	536.36	8098.4	2352.14	4073.49	1127.52	7871.58	646.98	673.22	3462.04	560.06
181773	53145.9	237.93	2309.26	4485.92	937.04	1158.58	1601.66	3917.76	1321.11	532.17	8100.81	3021.7	7789.18	3812.18	2817.52
29075.8	74528.7	182.31	2033.22	4091.6	887.22	1313.34	13124.9	4083.12	6190.02	831.87	9023.4	2597.76	5813.8	7554.66	2316.5
32070.4	51105.5	118.45	596.37	1285.78	534.24	881.92	13272.3	1586.82	5413.23	1065.15	6756.21	955.3	676.5	5717.86	1078.3
42477.1	49726.3	136.99	2430.8	3218.16	634.94	1312.28	11028.2	2882.14	4375.62	1143.72	9383.85	3385.78	9665.34	8528.82	3695.74
71144.6	67519.6	253.38	2968.46	3142.9	626.46	1522.16	12645.8	3653.82	5356.53	1248.21	5667.57	5894.98	9639.92	9272.56	3954.04
129184	24705.6	93.73	430.54	2492.06	586.18	498.2	5390.1	1391.78	2068.74	626.13	4005.45	1038.94	684.7	2116.42	613.36
139976	49848.9	309	1031.03	2616.08	599.96	868.14	8743.94	3083.54	4084.02	723.33	5567.94	3214.4	1394.82	3996.68	1118.48
148943	28042.8	64.89	215.27	1444.78	434.6	299.98	5027.58	1054.7	1960.2	596.97	3913.92	811.8	553.5	2264.02	402.62
118135	34570.9	107.12	558.26	2214.34	533.18	495.02	5951.9	1406.62	2708.64	933.12	5576.04	1666.24	876.58	2630.56	838.04
130807	72204	249.26	1007.34	4112.8	960.36	595.72	1259.28	3006.16	1512.27	408.24	3882.33	2296	989.74	2437.86	1786.78
173841	50792.4	182.31	1428.61	4196.54	955.06	720.8	2652.12	2374.4	1128.33	475.47	4499.55	1381.7	4721.56	2739.62	1607.2
141652	38295.4	152.44	580.92	2592.76	686.88	672.04	7477.24	1910.12	3675.78	773.55	6854.22	1135.7	673.22	3366.1	706.84
58277.5	55776.6	203.94	854.9	2376.52	598.9	542.72	7345.8	4082.06	3853.17	954.99	9423.54	1528.48	923.32	3225.88	1175.88
112583	39631.3	118.45	739.54	2743.28	775.92	558.62	8048.58	2246.14	3362.31	1082.97	7503.84	1840.08	1164.4	3612.1	820.82
176206	44247.8	187.46	612.85	1581.52	478.06	467.46	4482.74	1833.8	1501.74	183.87	2161.89	1556.36	715.86	1974.56	371.46
125449	80620.2	232.78	1236	2415.74	772.74	454.74	5531.08	2670.14	2447.82	795.42	4790.34	2716.66	1279.2	3307.88	1735.12
56990.6	47778.6	112.27	1060.9	2619.26	577.7	1043.04	9156.28	2311.86	3972.24	814.86	5729.13	3039.74	4171.34	5161.08	1965.54
132229	32633.5	108.15	830.18	3014.64	771.68	661.44	4644.92	1492.48	1734.21	200.07	2867.4	1148	2535.44	2684.68	1032.38
71048	49895.3	182.31	1520.28	2368.04	975.2	747.3	377.36	3751.34	1674.27	1146.96	9936.27	3600.62	1784.32	1919.62	2104.94
Single Cells
Patient 8: Healthy
47122.3	64302.9	163.77	878.59	2867.3	485.48	637.06	3697.28	1293.2	1602.18	233.28	2613.06	1529.3	1343.98	2220.56	1391.54
44034.5	32067	141.11	648.9	2728.44	663.56	596.78	9246.38	2326.7	4795.2	750.87	8060.31	1248.04	738	4026.2	554.32
118555	30693	115.36	1266.9	2581.1	541.66	748.36	6226.44	1449.02	3142.8	878.85	5780.16	2016.38	4008.98	4273.84	1635.08
178967	37110.9	121.54	868.29	3808.58	697.48	535.3	6373.78	3591.28	3338.01	565.38	5222.88	597.78	326.36	4437.02	1549.8
155180	47523.2	108.15	1039.27	3327.34	738.82	545.9	5088	3559.48	2158.65	301.32	3604.5	1568.66	2588.74	3082.38	1092.24
117764	42418.5	145.23	4128.24	3875.36	866.02	1971.6	13273.3	3095.2	5499.9	480.33	5273.1	3695.74	14972.4	11150.4	4938.04
48786.4	47868.2	123.6	923.91	2036.26	568.16	628.58	7187.86	3615.66	3343.68	962.28	6893.1	815.9	358.34	3110.26	1220.98
42543.5	48020.7	83.43	595.34	2887.44	719.74	787.58	9288.78	2604.42	3903.39	804.33	7280.28	1174.24	746.2	4186.92	823.28
98982.2	48609.8	223.51	3178.58	4252.72	938.1	1515.8	7325.66	3593.4	3218.94	758.97	6756.21	4619.88	13676.8	8726.44	4622.34
65353.7	40257.6	78.28	197.76	1955.7	429.3	408.1	4696.86	1687.52	2135.16	528.93	6807.24	457.56	383.76	2236.14	458.38
182479	41292.7	108.15	1803.53	4397.94	923.26	1293.2	9799.7	2065.94	4155.3	435.78	5134.59	1342.34	7138.92	6801.9	2459.18
88964.4	71270.9	167.89	2341.19	3396.24	810.9	1232.78	16140.6	3593.4	6045.03	661.77	4472.82	4866.7	6622.32	9229.1	3406.28
49164.4	71197.7	143.17	3401.06	3501.18	860.72	1414.04	8153.52	2491	2890.08	594.54	2238.03	4887.2	12188.5	7936.78	4319.76
159683	26866.5	124.63	3476.25	2846.1	752.6	1734.16	15441	3041.14	5410.8	814.86	5655.42	2579.72	12246.7	10769.9	4249.24
179422	44111.8	142.14	1131.97	4603.58	1128.9	596.78	705.96	2943.62	640.71	357.21	3198.69	1200.48	3895	1833.52	1382.52
111616	39559.2	136.99	1547.06	2423.16	614.8	1162.82	12477.3	1848.64	5434.29	349.11	2543.4	1597.36	4969.2	6643.64	1907.32
97825.6	53680.5	245.14	1768.51	3418.5	817.26	1305.92	12196.4	3189.54	3960.09	551.61	3116.88	2355.86	5548.12	6837.16	2129.54
60702.6	43836.8	159.65	1778.81	2706.18	713.38	1162.82	14306.8	2882.14	5606.01	1045.71	6008.58	2511.66	4902.78	7364.42	2514.94
135443	44466.1	162.74	1658.3	3368.68	790.76	1170.24	14516.7	3755.58	5934.06	1123.47	6503.49	1761.36	3771.18	7909.72	1879.44
42171.4	40103.1	104.03	690.1	3193.78	737.76	679.46	8867.96	1942.98	4267.89	1007.64	8513.91	1335.78	998.76	3936.82	1091.42
113963	46331.5	188.49	2077.51	3583.86	822.56	1403.44	10920.1	2203.74	4734.45	1473.39	7474.68	3398.9	7790.82	7918.74	3086.48
90157.2	58804.8	139.05	845.63	4313.14	966.72	527.88	3657	3261.62	2149.74	757.35	5405.94	3387.42	2227.12	2362.42	1389.08
116564	53026.5	193.64	2530.71	4101.14	815.14	844.82	12827.1	3719.54	7236.54	1305.72	4842.18	1826.96	1199.66	9395.56	3525.18
106314	82678.1	216.3	985.71	3855.22	1022.9	474.88	468.52	4411.72	918.54	573.48	6728.67	1885.18	633.04	686.34	1261.16
151134	45300.4	177.16	2994.21	4352.36	1001.7	1826.38	13060.3	2873.66	5968.89	1061.91	9230.76	3316.9	10394.3	9535.78	3598.16
39528.7	34562.7	27.81	646.84	3017.82	817.26	656.14	6232.8	1700.24	3421.44	1202.04	6631.47	1091.42	698.64	3106.98	792.94
147928	41092.9	147.29	1001.16	2757.06	561.8	761.08	10120.9	1652.54	4262.22	549.18	7660.17	2232.04	2357.5	5226.68	1548.16
35837.8	20915.2	69.01	655.08	1893.16	550.14	610.56	6279.44	1972.66	2664.09	1124.28	6856.65	1092.24	545.3	2545.28	1127.5
93246.7	57526.5	192.61	1592.38	2646.82	508.8	765.32	8090.98	1491.42	3590.73	656.1	3895.29	2825.72	4428.82	4901.96	2236.96
46765.3	34345.3	61.8	333.72	1918.6	429.3	248.04	3662.3	1802	2091.42	487.62	5859.54	640.42	267.32	1908.14	363.26
81595.1	63272.9	161.71	1257.63	3128.06	738.82	1012.3	10177.1	1882.56	4737.69	900.72	5704.02	2793.74	3773.64	5831.02	1649.84
185583	44779.2	131.84	1714.95	3589.16	850.12	988.98	16105.6	2436.94	6872.04	980.1	5473.98	594.5	1994.24	9207.78	2141.02
43078.6	50618.3	229.69	1439.94	3458.78	763.2	695.36	6618.64	1416.16	2506.14	750.87	4510.89	2584.64	2975.78	3859.74	1418.6
75091.8	50182.6	139.05	1754.09	2615.02	836.34	1186.14	7152.88	1515.8	3597.21	873.18	6290.46	2653.52	6416.5	5413.64	2468.2
95987.6	40289.5	172.01	2234.07	2713.6	660.38	1619.68	16192.6	3269.04	6027.21	437.4	2758.05	2178.74	5921.22	8978.18	2098.38
29169	31521.1	98.88	973.35	1537	488.66	403.86	4491.22	2248.26	2554.74	1470.96	5316.03	979.08	554.32	2535.44	1220.16
46601.5	47639.6	114.33	1085.62	2643.64	522.58	751.54	14508.2	2905.46	5970.51	916.11	6086.34	3123.38	1790.88	6538.68	1384.98
117140	45854.6	151.41	2743.92	3269.04	760.02	1478.7	8747.12	1768.08	4161.78	784.08	7028.37	3618.66	9867.06	7528.42	3681.8
154763	40953.8	152.44	1256.6	4797.56	1116.18	1133.14	14629.1	3061.28	5644.08	780.84	4706.91	1635.9	3158.64	6871.6	1366.94
94872.1	52866.8	191.58	809.58	2710.42	640.24	769.56	6031.4	1785.04	2302.02	392.85	3431.97	2139.38	1968.82	3630.14	1066.82
111353	64804.5	181.28	1767.48	3487.4	879.8	1179.78	8326.3	3052.8	3453.03	860.22	6493.77	3407.1	5632.58	5229.14	2701.08
107529	40776.7	157.59	994.98	3755.58	981.56	1325	10547	2307.62	4491.45	1021.41	7200.9	1116.02	2262.38	5077.44	1459.6
98608.4	47781.7	124.63	1797.35	3072.94	692.18	1412.98	15516.3	2902.28	6197.31	562.95	5513.67	2815.88	6453.4	8470.6	2406.7
30975.8	25597.6	89.61	553.11	2379.7	952.94	656.14	7412.58	2370.16	3487.86	850.5	8251.47	624.84	493.64	2981.52	849.52
59992.8	73372.1	190.55	1542.94	3279.64	967.78	864.96	2947.86	2337.3	1291.14	589.68	2293.11	1528.48	5356.24	3344.78	2058.2
41081.9	41526.5	128.75	361.53	2548.24	730.34	383.72	7699.84	2832.32	3768.12	730.62	12756.7	718.32	470.68	3140.6	467.4
49626.4	45363.3	66.95	1147.42	3199.08	642.36	642.36	10663.6	2559.9	4450.95	896.67	6855.84	1813.02	1583.42	4801.1	1429.26
161829	36832.8	167.89	1816.92	4011.04	737.76	1117.24	10781.3	3271.16	5682.96	744.39	11947.5	1595.72	6253.32	7190.58	2456.72
159503	31779.6	109.18	977.47	3547.82	807.72	689	9724.44	1949.34	4139.1	339.39	3755.16	815.9	587.12	5172.56	918.4
102635	52449.7	109.18	2179.48	2775.08	722.92	981.56	1772.32	2445.42	679.59	177.39	3392.28	2676.48	8037.64	3671.14	2910.18
122303	54665.2	202.91	4034.51	3883.84	1070.6	2430.58	15808.8	2484.64	5918.67	1397.25	7077.78	4745.34	15441.4	12505.8	5604.7
60107.9	28325	64.89	552.08	1817.9	479.12	804.54	9775.32	2258.86	4377.24	737.91	7876.44	979.9	730.62	4179.54	839.68
104830	46393.3	112.27	891.98	3074	780.16	551.2	3604	2876.84	2294.73	459.27	5257.71	1542.42	1576.04	2791.28	1266.9
76750	49536.8	94.76	1325.61	3288.12	687.94	758.96	8562.68	1736.28	3190.59	815.67	2963.79	2567.42	3780.2	5265.22	1728.56
55536.6	26871.7	28.84	217.33	2120	493.96	255.46	3943.2	1489.3	2064.69	421.2	4754.7	492	349.32	1798.26	549.4
56359	18363.9	99.91	261.62	1691.76	290.44	416.58	4131.88	1555.02	2057.4	219.51	4477.68	409.18	335.38	1585.88	419.02
35769.7	26991.2	61.8	611.82	2308.68	523.64	528.94	6470.24	2724.2	3701.7	1084.59	11224.2	949.56	546.94	2751.1	1051.24
65414.2	34603.9	107.12	366.68	2262.04	515.16	530	6119.38	1325	2787.21	909.63	7257.6	650.26	467.4	2614.98	537.92
48398.3	57034.2	113.3	727.18	2846.1	710.2	817.26	10300	2452.84	4371.57	487.62	2809.89	1828.6	1134.88	5059.4	830.66
105257	55408.8	186.43	2890.18	4353.42	649.78	1746.88	13881.8	2709.36	5533.92	2231.55	8061.12	3720.34	9124.96	9493.14	3991.76
68016.5	21987.4	82.4	277.07	1537	418.7	395.38	6096.06	1477.64	2794.5	489.24	5376.78	271.42	369.82	2364.88	563.34
126046	57864.4	174.07	2009.53	3478.92	801.36	1160.7	13288.2	3030.54	5826.33	917.73	6333.39	2926.58	5780.18	8181.96	2532.98
65368	30676.5	101.97	417.15	2499.48	745.18	369.94	4006.8	1274.12	2207.25	626.94	5399.46	1075.84	431.32	1731.02	757.68
120779	34084.8	160.68	1177.29	3553.12	696.42	957.18	8810.72	3033.72	3241.62	828.63	5120.01	1882.72	3576.02	5409.54	1309.54
103341	41817	118.45	2633.71	3105.8	589.36	1250.8	8154.58	1396.02	3572.91	952.56	4988.79	3497.3	9207.78	6986.4	3115.18
30455.9	36462	73.13	443.93	2298.08	607.38	484.42	6686.48	2273.7	2872.26	719.28	5305.5	1092.24	572.36	3131.58	675.68
61617.4	52460	130.81	1035.15	2934.08	581.94	686.88	7165.6	1864.54	3304.8	889.38	5996.43	2948.72	3126.66	4196.76	1435.82
132344	43950.1	179.22	1541.91	2606.54	737.76	1003.82	9381	3347.48	3551.04	807.57	7957.44	2483.78	5058.58	5796.58	1863.86
52741.1	38980.3	131.84	574.74	3319.92	993.22	753.66	12282.2	2106.22	5050.35	1241.73	7714.44	1219.34	921.68	4864.24	1012.7
43067.6	53091.3	170.98	436.72	2055.34	390.08	414.46	4358.72	2179.36	2160.27	476.28	5827.14	391.96	349.32	2201.7	676.5
112500	52978.1	145.23	2575	3543.58	810.9	1107.7	5959.32	3193.78	2864.16	665.01	5891.13	4251.7	7219.28	6315.64	3545.68
27133.7	56847.8	177.16	739.54	2202.68	541.66	405.98	758.96	1923.9	440.64	522.45	2378.16	1280.02	705.2	791.3	1171.78
81225.5	53379.8	185.4	2135.19	2719.96	705.96	1126.78	8579.64	2073.36	4435.56	1322.73	5265.81	3152.9	7026.58	6758.44	2935.6
152125	43940.8	130.81	4430.03	3684.56	880.86	1664.2	5226.86	2575.8	2030.67	389.61	3363.93	3608.82	17101.1	9798.18	5379.2
150697	43353.7	82.4	1105.19	4470.02	974.14	969.9	12413.7	2750.7	4993.65	720.9	6807.24	1444.84	1981.12	5884.32	1489.94
118800	45248.9	90.64	781.77	3087.78	481.24	1226.42	18651.8	3888.08	7912.89	823.77	8453.97	1574.4	1125.04	8085.2	944.64
134571	39604.5	162.74	711.73	2904.4	593.6	1152.22	12249.4	2505.84	5068.98	1010.88	4727.16	1976.2	2266.48	5537.46	964.32
35572.3	70243.9	214.24	455.26	2356.38	549.08	330.72	12.72	2286.42	379.89	395.28	2042.01	2049.18	927.42	282.9	767.52
103559	62709.5	233.81	548.99	2348.96	510.92	455.8	6099.24	1687.52	2716.74	342.63	2580.66	1438.28	880.68	2883.12	1082.4
56227.1	76431.1	140.08	1980.69	4325.86	972.02	1632.4	21625.1	2495.24	8287.11	1256.31	3576.96	3492.38	4928.2	10710	2264.02
70975	88814.8	212.18	1157.72	3445	897.82	551.2	5221.56	3021	3007.53	907.2	6230.52	2950.36	1358.74	2836.38	1273.46
115787	41759.3	222.48	937.3	3361.26	827.86	669.92	7149.7	1418.28	2841.48	915.3	4015.17	1972.1	1965.54	3799.88	1227.54
176319	62539.5	246.17	1511.01	3424.86	836.34	820.44	387.96	2666.96	548.37	217.08	3636.09	2139.38	5033.16	1972.1	1406.3
121441	79543.8	258.53	618	3543.58	951.88	695.36	4001.5	2852.46	2081.7	209.79	4362.66	2092.64	1178.34	2316.5	918.4
103023	36801.9	174.07	754.99	3236.18	766.38	954	8046.46	1719.32	3613.41	810	6638.76	2068.86	2220.56	4332.88	1141.44
140163	32002.1	125.66	672.59	3724.84	770.62	878.74	17897	2414.68	6759.45	590.49	5361.39	989.74	1135.7	7733.42	922.5
167489	54801.2	227.63	1866.36	3629.44	1017.6	964.6	395.38	3089.9	339.39	814.86	3415.77	3211.12	7244.7	2949.54	2453.44
60269.2	43435.1	77.25	614.91	2351.08	497.14	607.38	11051.6	2491	4732.02	605.88	6826.68	642.06	621.56	4847.02	507.58
229494	80899.3	158.62	2725.38	5610.58	1210.52	1970.54	17987.1	5487.62	7343.46	700.65	9910.35	3242.28	8775.64	10328.7	3165.2
52870.4	38426.2	97.85	678.77	2679.68	603.14	860.72	11609.1	2461.32	4900.5	2044.44	6697.08	1476.82	872.48	5107.78	1204.58
81316.2	59363	84.46	635.51	3562.66	726.1	491.84	3514.96	2414.68	1439.37	199.26	3530.79	2120.52	1048.78	1954.06	845.42
52820	64897.2	200.85	741.6	2558.84	631.76	451.56	67.84	2020.36	405	353.97	2751.57	3444.82	1650.66	650.26	1109.46
116305	35159.1	113.3	585.04	3186.36	797.12	500.32	5349.82	2969.06	2200.77	399.33	2804.22	1107	651.08	2632.2	501.84
148638	51103.4	155.53	551.05	4839.96	1133.14	437.78	3234.06	2263.1	1544.67	106.92	3677.4	1201.3	528.08	1420.24	258.3
38570.3	28887.4	25.75	342.99	2353.2	1011.24	434.6	3423.8	1716.14	1908.36	453.6	4369.95	775.72	300.94	1622.78	395.24
21414.1	44032.5	93.73	1162.87	3105.8	581.94	651.9	11102.4	4413.84	4284.09	751.68	5022	2933.96	1275.92	4610.04	1486.66
163125	43031.3	141.11	612.85	4400.06	1241.26	697.48	3936.84	2431.64	1690.47	434.97	4799.25	658.46	1100.44	1658.86	587.94
64484.3	89896.3	226.6	1625.34	4174.28	1029.26	1179.78	7621.4	3093.08	3139.56	848.88	8314.65	3916.32	5546.48	5110.24	2620.72
45019.8	37197.4	152.44	656.11	2765.54	642.36	413.4	6259.3	2486.76	3201.12	751.68	11712.6	1303.8	451	2562.5	765.06
39041.5	42669.8	149.35	779.71	2274.76	580.88	531.06	7376.54	1920.72	3705.75	1162.35	9002.34	1519.46	1059.44	3775.28	649.44
Single Cells
Patient 9: Sarcoidosis
213042	84630.1	260.37	2157.21	3960	740.3	761.2	5739.8	1959.1	2003.04	1106.82	3901.56	3630.4	1678.4	3039.2	2191.2
145548	64389.6	208.89	2193.84	4233.9	931.7	572	2268.2	2495.9	1034.28	1355.64	5463.12	3438.4	1521.6	1369.6	2007.2
142648	59076.3	241.56	2949.21	3949	759	1339.8	6092.9	2239.6	2322.84	761.28	6001.32	5172	10043.2	6541.6	3901.6
166786	70450.4	262.35	8329.86	3328.6	873.4	3742.2	4904.9	2150.5	2090.4	683.28	3839.94	8954.4	33902.4	15668	10656.8
171926	81552.2	227.7	1781.01	4076.6	970.2	1105.5	503.8	1441	663.78	308.88	3765.06	4968	7064	3207.2	2611.2
177313	65542	320.76	3839.22	3627.8	976.8	2009.7	7392	3197.7	3105.18	1042.08	5305.56	5838.4	15388	9248.8	5431.2
87001.2	55983.5	210.87	2965.05	4186.6	874.5	1150.6	6958.6	1734.7	2801.76	860.34	5034.9	4788.8	9707.2	7336	3664.8
180275	58719.9	176.22	1789.92	3032.7	645.7	731.5	5243.7	2047.1	2241.72	719.94	4229.94	3402.4	1778.4	3099.2	1751.2
124366	49325.8	125.73	5384.61	3406.7	852.5	2044.9	7585.6	1945.9	3013.14	638.82	4104.36	8155.2	21991.2	12552	6656.8
103302	50369.2	234.63	2098.8	2663.1	575.3	470.8	614.9	1790.8	627.12	625.56	4004.52	3806.4	4500.8	2513.6	2635.2
136112	58089.2	227.7	3103.65	3412.2	786.5	1510.3	6289.8	2368.3	2192.58	1262.04	6325.8	4696	11917.6	7114.4	4092.8
152320	42937.3	214.83	6470.64	3495.8	841.5	2596	6824.4	2031.7	2207.4	1012.44	3052.92	5624	19349.6	10558.4	7148.8
150552	80438.5	297	5042.07	4394.5	866.8	1107.7	5203	2277	3658.2	1930.5	5970.12	5200.8	8876.8	9372	6940.8
140360	33832.3	185.13	1199.88	1805.1	364.1	798.6	433.4	1870	279.24	514.8	1623.18	18347.2	7285.6	2350.4	1922.4
129866	63019.4	287.1	3263.04	4888.4	1009.8	1798.5	6943.2	2362.8	2491.32	1847.82	8208.72	5397.6	13285.6	8872	4658.4
138994	80122.7	261.36	2613.6	4545.2	972.4	1543.3	719.4	1600.5	483.6	434.46	1772.94	5262.4	11851.2	5472	3728
100994	48912.9	227.7	3402.63	3136.1	683.1	1533.4	5564.9	1867.8	2532.66	1116.18	3749.46	5193.6	11787.2	7628.8	4200
128196	60829.6	234.63	4227.3	3403.4	592.9	1965.7	5805.8	2252.8	2476.5	661.44	3556.8	5497.6	15800.8	9556	5296.8
103159	49993	157.41	2670.03	3335.2	614.9	1325.5	6755.1	2026.2	3154.32	841.62	7425.6	4241.6	10510.4	7072.8	3608.8
174720	64861.8	198.99	719.73	4040.3	825	653.4	327.8	1982.2	468	743.34	3428.88	4068	2816.8	1261.6	1330.4
175665	70246.4	231.66	2777.94	4030.4	908.6	1051.6	3537.6	5249.2	1667.64	740.22	5391.36	4881.6	9247.2	5973.6	3683.2
140881	77202.2	389.07	2634.39	3466.1	817.3	1057.1	2542.1	1725.9	2169.18	666.9	4553.64	4744.8	9660.8	6446.4	3745.6
159796	86363.6	206.91	2655.18	4514.4	1005.4	993.3	660	1291.4	426.66	387.66	2262	5283.2	9646.4	3673.6	3055.2
189554	59338.6	247.5	3996.63	3786.2	806.3	1717.1	8716.4	2060.3	3474.12	1281.54	6105.06	5599.2	14394.4	10066.4	4887.2
118467	48615.9	127.71	2610.63	3053.6	655.6	1013.1	3735.6	1383.8	1996.02	932.1	6966.96	4778.4	11102.4	6072	3650.4
166758	50670.2	263.34	2562.12	3700.4	847	1406.9	6569.2	2178	2327.52	1376.7	4359.42	3927.2	8151.2	5609.6	3018.4
180965	61756.2	204.93	1402.83	3539.8	808.5	458.7	347.6	1931.6	418.08	588.12	2511.6	3173.6	1447.2	632	1273.6
159360	50177.2	165.33	1375.11	2307.8	555.5	456.5	2853.4	1193.5	1358.76	327.6	2150.46	2639.2	3092.8	2562.4	1474.4
146919	71736.4	324.72	3192.75	3963.3	712.8	1318.9	1703.9	3132.8	1288.56	733.98	5895.24	4723.2	9830.4	5432	4276.8
92693.6	43109.6	182.16	583.11	2326.5	421.3	448.8	3478.2	1835.9	1195.74	534.3	4123.08	2380.8	2045.6	1819.2	1004
146527	63971.8	237.6	1796.85	4213	760.1	584.1	4339.5	2426.6	1772.94	819.78	4605.9	3770.4	1944.8	2720.8	1959.2
172968	70021.7	229.68	378.18	4247.1	914.1	366.3	548.9	1171.5	620.1	298.74	2660.58	4272	1916	650.4	846.4
112887	53031.3	218.79	5245.02	2968.9	737	2020.7	7326	2489.3	2825.16	921.96	5922.54	7109.6	19176	11534.4	6807.2
164515	75144	293.04	3564	3791.7	917.4	1581.8	7673.6	2058.1	2884.44	1059.24	6796.14	6369.6	14979.2	9503.2	4728
125631	66615.1	209.88	2068.11	3441.9	716.1	997.7	4239.4	2299	1251.9	776.1	3870.36	4868.8	6846.4	4152.8	2524.8
108101	53281.8	249.48	2800.71	4065.6	979	1505.9	6099.5	3201	1986.66	766.74	5803.98	4332	10363.2	6576.8	3577.6
118734	61152.3	170.28	754.38	4140.4	825	624.8	4140.4	2461.8	1619.28	632.58	4516.98	3746.4	2358.4	2492	1143.2
117498	46333	163.35	2176.02	3316.5	695.2	1048.3	3621.2	1719.3	1716	1000.74	6812.52	3499.2	8619.2	5292	3151.2
186800	58676.3	296.01	844.47	4491.3	959.2	561	609.4	2035	627.12	591.24	3384.42	3200.8	1459.2	781.6	880.8
112199	78057.5	253.44	1802.79	3479.3	822.8	1078	5183.2	2247.3	2145	1101.36	5899.92	4756.8	5691.2	4868.8	2577.6
107878	41788.9	155.43	3070.98	2099.9	441.1	1159.4	4675	1027.4	1717.56	945.36	3201.12	5896	13168.8	6860	4362.4
128884	64186.7	187.11	520.74	4781.7	1038.4	618.2	223.3	2168.1	330.72	445.38	3371.16	3174.4	1685.6	620	670.4
127382	72161.1	217.8	2925.45	4934.6	927.3	1576.3	7536.1	3074.5	3010.8	833.82	5934.24	4791.2	10407.2	7094.4	3399.2
139976	125545	205.92	3500.64	2824.8	722.7	1358.5	7247.9	2399.1	2986.62	1766.7	4259.58	4032	9276	7194.4	4609.6
112620	60462.3	250.47	6222.15	3225.2	553.3	2561.9	7340.3	1989.9	2914.08	769.08	5289.96	7124	22620	12075.2	7948.8
170759	67116.1	223.74	3079.89	3619	764.5	1423.4	4994	3128.4	1938.3	579.54	6415.5	4588.8	11938.4	7176	3884.8
131472	46509.2	143.55	2582.91	2911.7	557.7	873.4	4291.1	1410.2	2084.94	972.66	5186.22	4611.2	9999.2	5973.6	3807.2
145832	70940.4	243.54	5299.47	4495.7	874.5	2164.8	5974.1	1573	2368.08	904.8	3038.88	6593.6	20571.2	11016	6705.6
130329	58722.8	215.82	1981.98	2795.1	567.6	1031.8	4988.5	1997.6	1746.42	324.48	1913.34	3646.4	6515.2	4710.4	2451.2
135623	57588.3	219.78	4143.15	4403.3	933.9	1467.4	1816.1	2777.5	817.44	995.28	4651.92	6115.2	16687.2	7518.4	5574.4
144258	64948.9	224.73	5126.22	3690.5	636.9	1982.2	2258.3	2751.1	900.12	1233.18	4075.5	6730.4	20863.2	9622.4	6585.6
127990	66228	183.15	2838.33	4062.3	875.6	1646.7	11546.7	2447.5	4385.16	873.6	6167.46	4596	8149.6	8390.4	3276
123757	57970.4	204.93	3086.82	2450.8	651.2	1313.4	6026.9	2391.4	2158.26	606.84	5921.76	4402.4	11053.6	7142.4	3596.8
115359	62053.2	234.63	3046.23	5149.1	1053.8	1424.5	10833.9	2988.7	3603.6	995.28	5772	5047.2	9543.2	7896	3563.2
151794	41302.8	213.84	5189.58	3903.9	754.6	2277	7482.2	2665.3	2889.9	679.38	4697.16	5998.4	18410.4	11191.2	6453.6
141748	80510.8	266.31	3358.08	4145.9	874.5	1914	7250.1	2273.7	3175.38	1028.04	4503.72	6408.8	13912	8669.6	4655.2
117968	58746.6	184.14	4003.56	4188.8	737	1757.8	6293.1	2194.5	2570.1	1195.74	8248.5	5008	14609.6	8174.4	5074.4
135765	58642.7	261.36	1480.05	2592.7	557.7	926.2	473	1832.6	270.66	226.98	2036.58	4246.4	6394.4	2620.8	2225.6
161714	53702.6	273.24	1624.59	2673	532.4	891	2242.9	1067	841.62	1290.9	1448.46	4093.6	6792.8	3614.4	2736.8
100495	38637.7	234.63	1624.59	2968.9	627	771.1	3384.7	1545.5	1692.6	347.1	2839.98	3313.6	5359.2	4085.6	2028.8
161022	57120	205.92	3220.47	2686.2	525.8	1149.5	4534.2	1111	1862.64	643.5	3583.32	5348.8	13795.2	7812	4529.6
145080	71083	205.92	523.71	2497	620.4	458.7	302.5	1685.2	365.04	273.78	2862.6	4694.4	2232	833.6	743.2
142319	47369.5	236.61	1818.63	2516.8	739.2	970.2	3725.7	1157.2	1872	1024.92	3964.74	4056	7132.8	4749.6	2864.8
182387	66290.4	288.09	692.01	3529.9	749.1	651.2	3451.8	1338.7	1511.64	364.26	3088.02	3987.2	2158.4	2275.2	959.2
158149	50956.3	148.5	1819.62	2987.6	551.1	597.3	4901.6	2171.4	1801.02	628.68	2994.42	2823.2	2414.4	3103.2	1590.4
119711	67752.6	232.65	6851.79	4930.2	856.9	897.6	4180	2887.5	4013.88	2287.74	3786.12	4508.8	6280	10041.6	7964.8
99552.9	68592.1	190.08	5074.74	4330.7	926.2	2142.8	6065.4	2300.1	2733.9	875.94	5106.66	10689.6	20357.6	11004	6051.2
158605	74679.7	392.04	2721.51	4360.4	983.4	1337.6	5654	2074.6	2414.1	915.72	5166.72	4989.6	9356	6219.2	3584
133234	38152.6	151.47	2025.54	2217.6	518.1	649	4183.3	1252.9	1568.58	492.96	2889.12	2978.4	4528.8	3965.6	2224
142700	64994.5	206.91	2502.72	4132.7	771.1	1265	10015.5	2630.1	3970.98	1517.1	8033.22	4691.2	8835.2	7675.2	2993.6
141804	64249	218.79	2598.75	2324.3	555.5	1509.2	4673.9	2851.2	2413.32	678.6	3779.88	22375.2	13898.4	6828.8	3997.6
44357.1	60969.2	146.52	2510.64	3281.3	698.5	1146.2	5899.3	1756.7	2566.2	3130.92	4921.02	5226.4	9203.2	6680.8	3719.2
78795.4	74092.6	245.52	3285.81	3161.4	697.4	1182.5	4834.5	1755.6	2003.82	319.8	2174.64	5665.6	12848	7488	4293.6
119432	40905.8	147.51	2631.42	2567.4	641.3	1039.5	3771.9	1377.2	2098.98	881.4	6611.28	5242.4	11048.8	6140.8	3607.2
139293	65491.5	157.41	1602.81	3719.1	708.4	675.4	2744.5	1359.6	1727.7	694.98	4855.5	5332	2216.8	2458.4	1887.2
127274	69892	331.65	3626.37	4305.4	1078	1947	6483.4	2214.3	2350.92	1464.06	5685.42	5808	13586.4	8020.8	4912.8
112632	64266.8	212.85	3001.68	3593.7	991.1	1492.7	6091.8	2401.3	2381.34	886.08	7422.48	4656	11167.2	6393.6	3680.8
181836	62215.6	277.2	3939.21	3883	724.9	1892	9667.9	2888.6	3166.02	1921.14	7651.8	6000.8	15199.2	10462.4	5276.8
205653	74405.4	291.06	7750.71	4032.6	763.4	3175.7	1705	2347.4	390.78	354.9	2948.4	9158.4	32189.6	13761.6	10208
33650.3	46235	303.93	1244.43	3858.8	1697.3	739.2	501.6	1650	456.3	17251.3	5819.58	3752.8	1900.8	805.6	4052.8
164681	51210.7	181.17	2991.78	4172.3	856.9	1482.8	6229.3	2415.6	2290.08	1133.34	6622.2	4273.6	10662.4	6568	3628
130356	61643.3	212.85	4171.86	3589.3	699.6	1952.5	7536.1	2246.2	2478.06	618.54	6697.08	5694.4	15009.6	9355.2	5265.6
193326	57460.6	204.93	823.68	3421	709.5	389.4	2555.3	1870	1278.42	561.6	7554.3	3201.6	1282.4	1423.2	1168.8
193861	69044.6	260.37	2044.35	3394.6	886.6	609.4	2563	1699.5	1180.92	694.2	1545.96	3710.4	1789.6	1948	1842.4
117739	50382.1	205.92	3714.48	3919.3	783.2	1606	4200.9	1797.4	1400.1	1067.82	4856.28	4979.2	14856.8	8008.8	4874.4
128884	64186.7	187.11	520.74	4781.7	1038.4	618.2	223.3	2168.1	330.72	445.38	3371.16	3174.4	1685.6	620	670.4
117781	59993	184.14	4122.36	3342.9	764.5	1259.5	3265.9	1215.5	1659.06	1212.12	6446.7	5228	16325.6	8822.4	5154.4
140940	52552.2	225.72	2506.68	2432.1	635.8	1505.9	3666.3	1749	1310.4	422.76	1648.92	4946.4	11395.2	6500	3567.2
224177	66101.3	276.21	3189.78	4653	1014.2	455.4	1092.3	2851.2	964.08	1482.78	5518.5	3121.6	1613.6	1887.2	3240.8
156558	73872.8	294.03	996.93	4370.3	943.8	881.1	4954.4	2569.6	2200.38	1103.7	5099.64	4163.2	1838.4	2796	1450.4
92624.7	76881.4	152.46	4259.97	4027.1	808.5	1617	8191.7	2713.7	3376.62	1071.72	5362.5	5646.4	12652.8	9315.2	5026.4
74242.8	71093.9	224.73	5479.65	3658.6	865.7	2191.2	7441.5	2284.7	2700.36	662.22	4293.9	7675.2	22441.6	12774.4	7224.8
121276	58808	186.12	1789.92	2711.5	618.2	920.7	3704.8	2753.3	1422.72	1194.96	4903.86	3686.4	5275.2	3638.4	2316
168403	83612.4	372.24	10018.8	3751	822.8	2792.9	10532.5	2460.7	5648.76	2263.56	5989.62	8942.4	27465.6	20255.2	12123.2
132214	68947.6	195.03	4386.69	3894	958.1	1996.5	8509.6	1820.5	2825.16	1382.16	5602.74	5594.4	15896.8	9681.6	5421.6
149898	51134.5	196.02	3225.42	3074.5	723.8	1360.7	5002.8	2416.7	1980.42	1896.96	6387.42	8299.2	12642.4	7400	4358.4
139071	50042.5	265.32	4531.23	4611.2	936.1	1975.6	5683.7	2316.6	1891.5	486.72	4013.88	5635.2	15765.6	8424	5116
172737	61283	229.68	4007.52	4123.9	805.2	2021.8	8906.7	2165.9	3387.54	2543.58	7684.56	4917.6	13839.2	9584.8	5087.2
160189	85396.4	253.44	2122.56	4497.9	836	1269.4	10274	3378.1	3793.14	1230.06	6307.86	4623.2	5247.2	6854.4	2975.2
60484.8	75431.1	216.81	3429.36	4097.5	906.4	870.1	1983.3	2302.3	1262.82	1299.48	4323.54	9048.8	7828.8	4412	3720
Single Cells
Patient 10: Sarcoidosis
92824.4	58845.6	164.34	5030.19	4131.27	839.95	813.2	6676.8	2841.92	4326.63	1518.44	4891.81	1296.8	4585.6	8797.6	5917.6
91841	69582.1	241.56	740.52	3736.44	964.07	531.79	316.72	1735.54	851.62	542.08	5754.21	969.6	724	742.4	1323.2
117640	47158.7	134.64	3571.92	3504.25	663.4	1015.43	5909.61	2508.08	3916.22	1765.61	7275.73	1516.8	3869.6	8106.4	4841.6
104908	44377.7	118.8	538.56	3203.58	671.96	387.34	286.76	1235.85	766.15	379.61	3555.09	614.4	421.6	842.4	916.8
97586.4	49296.1	233.64	2296.8	4143.04	938.39	215.07	866.7	2284.45	556.71	1056.44	3408.02	700	384	704	2027.2
75736.6	41802.8	183.15	1109.79	3531	781.1	490.06	4749.73	1825.42	2721.18	977.13	5553.24	668.8	565.6	3588	1462.4
126342	59306.9	276.21	5760.81	5097.48	1007.94	2076.87	5415.27	2076.87	1914.99	294.14	3098.48	4316.8	22351.2	11585.6	7501.6
113308	62769	238.59	1204.83	4747.59	936.25	375.57	613.11	1522.61	1098.79	701.47	6168.47	675.2	272.8	1423.2	1100
128135	53039.2	180.18	3415.5	4199.75	908.43	749	2026.58	3446.47	719.95	1524.6	2942.94	511.2	592	1376.8	2708.8
158583	60090	224.73	10058.4	5271.89	934.11	2669.65	9038.29	2891.14	3820.74	2456.3	7005.46	4463.2	23180	16313.6	11328
86102.2	41671.1	109.89	5349.96	3618.74	777.89	1706.65	3492.48	1292.56	1944.25	1406.79	4936.47	3999.2	19645.6	10572	6191.2
97491.6	52853.1	193.05	4505.49	3389.76	695.5	1434.87	7012.78	2505.94	3595.13	759.99	9272.34	3696	15776.8	10585.6	5712.8
179417	67898.2	242.55	244.53	2607.59	761.84	329.56	123.05	1110.66	261.03	275.66	2753.52	843.2	583.2	336.8	566.4
122675	60279.1	174.24	2429.46	3962.21	666.61	231.12	434.42	2798.05	550.55	1047.2	4248.86	885.6	464	708	1925.6
146951	63545.1	294.03	824.67	3160.78	688.01	505.04	487.92	1193.05	627.55	298.76	2211.44	877.6	696.8	793.6	1272
99459.9	58679.3	238.59	2587.86	3039.87	594.92	265.36	1568.62	3277.41	1776.39	1093.4	2873.64	973.6	774.4	3750.4	3153.6
107319	51734.4	191.07	7141.86	5184.15	1048.6	2682.49	5962.04	2329.39	2746.59	1024.1	10390.4	4521.6	26460.8	13355.2	9028
89684.8	66707.2	199.98	4610.43	3017.4	759.7	385.2	1258.32	2609.73	1321.32	1717.87	3056.13	1172.8	472.8	2440	4060
122774	62269	201.96	492.03	3701.13	909.5	616.32	246.1	1859.66	696.08	743.05	3706.78	1226.4	691.2	1048	1304
115896	64103.5	240.57	424.71	3417.58	720.11	161.57	197.95	1291.49	455.84	231.77	3527.37	922.4	470.4	341.6	649.6
93627.1	58117.9	165.33	360.36	2807.68	581.01	308.16	176.55	716.9	275.66	408.1	2765.07	829.6	1214.4	788	655.2
123148	68608	247.5	7746.75	4033.9	889.17	2622.57	6392.18	3185.39	2802.03	1793.33	4999.61	4778.4	23271.2	13816.8	9864
86742.9	31901.8	168.3	1994.85	2015.88	547.84	688.01	4324.94	2225.6	1980.44	332.64	4998.84	844.8	5044.8	4092.8	2718.4
115522	60900.8	280.17	945.45	4151.6	964.07	516.81	7053.44	3626.23	3104.64	833.14	4777.08	1280	1773.6	3672	1056
83428.4	61906.7	245.52	1486.98	2954.27	664.47	352.03	401.25	1805.09	464.31	900.9	2315.39	687.2	342.4	554.4	1693.6
92629.2	55780.6	222.75	7589.34	3838.09	831.39	2568	6001.63	2630.06	2681.14	1298.99	7343.49	5494.4	28188.8	14645.6	9475.2
103423	58619.9	168.3	6371.64	4169.79	1018.64	1429.52	6644.7	2962.83	3852.31	2219.91	3928.54	2573.6	10697.6	10038.4	7147.2
106317	58119.9	164.34	3419.46	4925.21	883.82	1392.07	8145.91	2254.49	3134.67	442.75	5248.32	2346.4	10548.8	7610.4	3725.6
107311	62298.7	283.14	6531.03	4033.9	789.66	1276.51	5714.87	2217.04	3625.16	1988.91	3407.25	2424.8	8807.2	10283.2	7381.6
121826	75057.8	293.04	934.56	3709.69	902.01	615.25	385.2	1835.05	719.18	303.38	3059.98	890.4	468	1199.2	1382.4
107660	44845	220.77	1155.33	3056.99	516.81	110.21	355.24	2493.1	627.55	650.65	4060.21	632.8	475.2	380	1260.8
154111	52334.4	173.25	3267.99	4165.51	817.48	514.67	1847.89	2099.34	1539.23	1476.09	4924.15	768	2500	3059.2	3085.6
82262	55566.7	181.17	738.54	3400.46	756.49	505.04	4929.49	3858.42	2314.62	455.84	7320.39	1057.6	641.6	2464.8	994.4
101399	55800.4	210.87	678.15	4241.48	850.65	800.36	5008.67	3941.88	1833.37	218.68	4556.86	980	651.2	2281.6	1047.2
80518.9	62042.3	278.19	8680.32	4273.58	929.83	3245.31	3152.22	1819	1339.8	626.78	3845.38	7036	37544.8	17163.2	11926.4
120621	47807.1	180.18	1559.25	4055.3	1026.13	479.36	497.55	2436.39	612.15	772.31	2306.92	932	482.4	568	1665.6
95329.7	48641.7	173.25	4164.93	3541.7	841.02	1656.36	4176.21	1090.33	1824.13	1091.86	6491.1	3576	18076.8	9511.2	5934.4
118931	56656.7	215.82	858.33	3315.93	667.68	633.44	2879.37	2738.13	1707.09	749.98	4983.44	705.6	420.8	1733.6	1211.2
150488	56917.1	188.1	2047.32	4147.32	941.6	172.27	333.84	2137.86	270.27	907.06	3659.81	542.4	468.8	700.8	2202.4
156379	62540.3	234.63	3154.14	4479.02	1017.57	243.96	566.03	2773.44	1015.63	1289.75	4271.19	1017.6	631.2	1749.6	3304.8
97426.8	53512.5	294.03	2955.15	2597.96	812.13	1160.95	5292.22	2350.79	2353.89	1014.86	5177.48	2553.6	11955.2	7708.8	4025.6
74166	49381.2	217.8	2831.4	3666.89	761.84	977.98	2924.31	1621.05	2042.81	717.64	3440.36	2083.2	7989.6	5845.6	3674.4
100310	57979.4	199.98	2243.34	3360.87	751.14	461.17	474.01	2504.87	478.94	782.32	2664.2	820	488.8	640.8	1945.6
86663.5	60390	208.89	2148.3	2828.01	517.88	460.1	3757.84	1135.27	1657.81	911.68	4265.8	507.2	348	1692	1753.6
102940	57911	231.66	1668.15	1822.21	496.48	555.33	1075.35	868.84	770	901.67	2259.95	1469.6	2149.6	2319.2	2291.2
78595.1	53040.2	219.78	634.59	3320.21	730.81	425.86	300.67	1649.94	800.03	240.24	3689.84	813.6	486.4	271.2	715.2
189777	80440.5	124.74	4641.12	3811.34	745.79	1473.39	3265.64	2243.79	2122.12	1770.23	9474.85	3245.6	14380.8	7924.8	5997.6
131686	56743.8	223.74	3201.66	3300.95	902.01	1327.87	2147.49	2938.22	924.77	659.89	3752.98	2588.8	11504.8	6046.4	3862.4
63694.4	68721.8	245.52	3525.39	2625.78	682.66	442.98	3892.66	15496.8	1908.06	1399.86	8289.82	1151.2	760.8	2923.2	3540
103840	46131	173.25	4776.75	3587.71	799.29	1785.83	4357.04	2693.19	1970.43	992.53	4959.57	3740	18351.2	10068	6664
109039	45512.3	95.04	4060.98	2000.9	446.19	1243.34	1097.82	1657.43	472.78	226.38	2015.09	3345.6	18161.6	7686.4	5602.4
121093	59171.3	123.75	3667.95	3239.96	823.9	1443.43	3167.2	1158.81	1693.23	921.69	4750.13	3117.6	13424	6972	4797.6
114894	41753.2	147.51	2776.95	2999.21	530.72	471.87	697.64	2958.55	1094.17	1136.52	3392.62	580	536.8	2315.2	2944.8
116647	55932	219.78	1503.81	3811.34	786.45	640.93	6981.75	2698.54	2849	1074.15	8393	945.6	604	3204.8	1851.2
85283.3	41968.1	128.7	6262.74	2541.25	459.03	2026.58	5366.05	2707.1	1647.8	467.39	4577.65	3980.8	22844	11644	8532.8
58276.3	52249.2	219.78	2122.56	2979.95	673.03	980.12	523.23	858.14	184.8	237.16	2385.46	1795.2	8291.2	3448	2768
77411.7	48003.1	173.25	3545.19	2376.47	576.73	481.5	3504.25	2897.56	3996.3	1452.22	8121.19	1540.8	3051.2	7160	4998.4
88928.3	43277.9	185.13	1251.36	2398.94	367.01	287.83	284.62	2759.53	375.76	543.62	3465.77	688	458.4	504	1156
130737	30024.7	107.91	2131.47	2343.3	538.21	817.48	4605.28	2096.13	1607.76	332.64	3716.79	1248	6115.2	4982.4	3016
105958	63317.4	145.53	1254.33	4396.63	1014.36	390.55	570.31	3612.32	480.48	632.17	4797.87	856	555.2	516	1422.4
138402	69474.2	343.53	2408.67	4787.18	842.09	918.06	2200.99	2887.93	1586.97	1399.86	3911.6	1102.4	1103.2	2580	2740
158921	63882.7	229.68	774.18	3887.31	816.41	731.88	368.08	1633.89	857.78	306.46	4099.48	1152	932.8	1196	1624
99909.5	39238.6	148.5	2935.35	3480.71	744.72	1232.64	4910.23	3324.49	1708.63	295.68	4928.77	1791.2	9472.8	6046.4	3298.4
110043	72837.3	306.9	9480.24	4319.59	919.13	2667.51	5944.92	2548.74	2174.48	1531.53	4235.77	5480	30317.6	15431.2	10820
103292	56417.1	160.38	5167.8	3360.87	680.52	1776.2	2677.14	2296.22	1412.18	572.88	4930.31	3468	17747.2	8670.4	6519.2
85369.1	59900.9	349.47	4158	4665.2	891.31	619.53	5693.47	3967.56	4059.44	2047.43	9358.58	991.2	596.8	6500.8	4926.4
96386	53281.8	242.55	367.29	2625.78	593.85	207.58	306.02	1278.65	473.55	475.09	4736.27	590.4	493.6	377.6	737.6
97435.7	49686.1	216.81	2488.86	3992.17	858.14	315.65	367.01	2106.83	466.62	962.5	2175.25	740	462.4	736.8	1849.6
114406	33425.4	201.96	1430.55	2258.77	563.89	364.87	350.96	1793.32	421.96	675.29	3103.1	344	415.2	533.6	1140.8
98308.1	54092.6	140.58	5486.58	3208.93	620.6	2226.67	7480.37	3082.67	2805.88	1258.18	7662.27	4548	22414.4	12683.2	7444.8
103690	47941.7	154.44	3798.63	2821.59	656.98	1152.39	2773.44	2463.14	1384.46	1091.86	4923.38	2731.2	12268	6538.4	4600
90781.6	51730.5	174.24	5204.43	3173.62	579.94	1659.57	5189.5	2348.65	2708.09	1478.4	5099.71	3369.6	16364	11930.4	7396.8
145516	48582.3	194.04	2340.36	2228.81	393.76	1096.75	4535.73	1503.35	1661.66	222.53	2758.91	1846.4	8219.2	5404	2833.6
103685	69745.5	333.63	3129.39	4073.49	799.29	929.83	766.12	1923.86	630.63	1039.5	2729.65	1638.4	6157.6	2883.2	3604.8
97744.3	52418.5	210.87	6789.42	4518.61	736.16	1526.89	5064.31	4048.88	2377.76	1889.58	5979.82	2540	10540.8	8600.8	7736.8
137348	46107.3	136.62	3026.43	3437.91	629.16	1381.37	480.43	1422.03	515.13	337.26	2686.53	2117.6	10455.2	4618.4	3639.2
71298.6	61809.7	228.69	4367.88	3782.45	857.07	1492.65	2836.57	1556.85	1985.06	1242.01	5757.29	3769.6	17679.2	9372.8	6120.8
90749.2	54256	193.05	1750.32	3854.14	816.41	446.19	227.91	2422.48	405.79	784.63	3502.73	836.8	505.6	479.2	1479.2
132040	57231.9	300.96	7535.88	4253.25	878.47	2015.88	2745.62	2685.7	1553.86	1458.38	6113.03	4088.8	21508	11670.4	8875.2
130482	54654.9	263.34	763.29	3448.61	719.04	615.25	319.93	1447.71	745.36	578.27	3620.54	653.6	571.2	862.4	964
95962.3	72528.4	243.54	4497.57	3863.77	868.84	545.7	5110.32	2563.72	3524.29	2363.13	5917.45	1272.8	1255.2	7487.2	5849.6
153466	61881.9	244.53	15300.5	4798.95	681.59	3475.36	5879.65	3214.28	4889.5	3300.99	5423.11	7154.4	37956.8	26131.2	20015.2
94619.3	42152.2	83.16	665.28	2658.95	413.02	408.74	3843.44	2293.01	1315.93	196.35	5348.42	767.2	1431.2	2290.4	878.4
146836	66976.5	331.65	611.82	3045.22	691.22	472.94	-19.26	1380.3	441.21	485.87	4277.35	849.6	466.4	201.6	980
78487.4	55434.1	125.73	3654.09	2947.85	645.21	1454.13	5914.96	3305.23	2070.53	527.45	4984.21	2744.8	11890.4	7723.2	4556.8
83695.7	53583.8	191.07	4971.78	3449.68	757.56	1496.93	5092.13	2735.99	2349.27	1022.56	5021.17	3474.4	16649.6	9792.8	6503.2
123953	44788.6	220.77	3030.39	2599.03	490.06	1651.01	4840.68	2396.8	1993.53	1161.93	5928.23	2246.4	10567.2	6120.8	3976
95119.1	71175.1	349.47	755.37	3684.01	802.5	603.48	690.15	1792.25	301.07	431.97	2298.45	1116.8	729.6	856.8	1080.8
109510	51399.8	151.47	6343.92	2331.53	618.46	1303.26	2468.49	2160.33	1594.67	1284.36	6172.32	2434.4	12586.4	7455.2	6743.2
68415	50506.8	136.62	5120.28	3476.43	667.68	1547.22	6665.03	2929.66	3244.01	1242.78	6571.18	2979.2	14217.6	9468.8	5936
103762	75173.7	259.38	280.17	2508.08	577.8	474.01	282.48	1558.99	561.33	300.3	4724.72	972	515.2	536	909.6
119478	43001.6	99.99	3107.61	2619.36	570.31	546.77	778.96	2319.76	583.66	758.45	2788.94	1372.8	5181.6	2376	2982.4
117982	67850.6	267.3	1423.62	3006.7	863.49	589.57	1978.43	3098.72	1352.12	401.94	4050.2	1853.6	4664	2931.2	1943.2
112168	47635.8	293.04	5565.78	4441.57	1014.36	2278.03	6644.7	3217.49	2764.3	1189.65	7953.33	4490.4	18236.8	11007.2	7480
96412.7	45133.1	174.24	4220.37	2334.74	705.13	1669.2	4588.16	2689.98	1899.59	437.36	4464.46	3249.6	14641.6	8242.4	5160
83157	46901.2	238.59	2273.04	3228.19	678.38	987.61	6240.24	2898.63	2377.76	472.01	6014.47	1502.4	5462.4	5731.2	2684
80249.9	37235.9	150.48	1607.76	2876.16	508.25	663.4	3253.87	1720.56	1417.57	541.31	3613.61	1335.2	5812.8	3764.8	2214.4
116980	59226.8	231.66	4760.91	3407.95	702.99	2074.73	7969.36	1491.58	2676.52	496.65	4280.43	3379.2	17490.4	10933.6	6158.4
129694	48217	230.67	1621.62	3717.18	940.53	627.02	1277.58	1859.66	461.23	752.29	2403.94	260.8	479.2	784.8	1373.6
153105	56083.5	270.27	4955.94	4274.65	878.47	1240.13	4589.23	2630.06	2541.77	1662.43	4168.78	2057.6	9256.8	8929.6	6508
Single Cells
Patient 11: Sarcoidosis
227966	93430.3	126.72	528.66	884	368.16	396.24	1425.84	1366.56	1463	1583.12	2372.37	1857.29	838.19	949.58	903.76
82457.2	83656	287.1	2319.57	3097.12	856.96	1279.2	13980.7	3416.4	5293.75	893.2	3884.65	6665.23	4609.65	6907.76	3419.12
180658	71550.3	116.82	2028.51	1910.48	448.24	1070.16	1176.24	2907.84	670.67	290.29	3922.38	5248.76	7426	3419.91	3091.27
109446	67813	99.99	1836.45	1060.8	357.76	867.36	6552	1745.12	3163.16	857.78	4216.52	3608.72	4709.19	4886.15	2743.67
149788	61750.3	171.27	2498.76	1557.92	451.36	1034.8	2349.36	2041.52	1304.38	388.85	3154.69	3833.87	9315.68	4961.99	3368.56
80704.4	106115	135.63	914.76	3185.52	808.08	499.2	427.44	2654.08	255.64	763.84	3367.21	4484.04	1813.84	793.95	1550.77
140161	71740.4	173.25	2841.3	3662.88	847.6	1341.6	9432.8	2459.6	3793.02	832.37	6319.39	5368.84	7626.66	7936.34	4209.91
228861	58286.2	232.65	859.32	1706.64	533.52	576.16	386.88	1792.96	602.14	423.5	2983.75	5961.34	2491.66	1160.51	1869.14
148315	81649.3	160.38	689.04	1674.4	514.8	353.6	220.48	2147.6	137.83	429.66	2245.32	3184.49	1426.74	550.63	1203.96
100570	50970.2	144.54	2178.99	3021.2	700.96	1016.08	7525.44	1879.28	3246.32	1252.02	5125.12	3664.81	4894.05	5284.31	2847.16
100065	111637	267.3	3751.11	2137.2	520	1389.44	9154.08	2993.12	3654.42	1310.54	3233.23	7264.84	10314.2	8042.99	5396.49
110843	59726.7	95.04	1664.19	1104.48	353.6	634.4	2761.2	1095.12	1612.38	670.67	4957.26	2908.78	5429.67	3454.67	2696.27
79807.7	87283.4	168.3	2061.18	3813.68	941.2	1454.96	9656.4	3751.28	3716.02	886.27	4805.57	5305.64	7463.13	7323.3	3176.59
158609	80881	280.17	1556.28	1758.64	626.08	938.08	2515.76	2385.76	1411.41	277.97	3993.99	4068.5	4773.18	2870.07	2370.79
139058	76153.8	177.21	2383.92	2961.92	1085.76	1317.68	3387.28	2018.64	1586.2	781.55	2975.28	4347.37	7420.47	4333.94	3424.65
108051	64970.7	213.84	2163.15	1528.8	505.44	849.68	4516.72	1290.64	3893.12	1403.71	2347.73	3697.2	6088.53	4697.34	2685.21
253429	234028	490.05	5604.39	4890.08	1438.32	2238.08	4177.68	5053.36	2273.04	1323.63	7528.29	11808.9	14886	7681.96	7807.57
115675	63691.7	176.22	2652.21	2889.12	531.44	1256.32	7327.84	2782	2849	810.81	7685.37	7046.8	9291.19	5932.11	4010.83
141475	163908	624.69	6482.52	3621.28	1260.48	2009.28	5278	4464.72	3073.07	2959.11	8463.84	15112.7	15856.9	8276.04	11025.2
88226	93707.5	204.93	958.32	2285.92	676	633.36	366.08	3660.8	559.79	610.61	3970.12	4713.14	2348.67	1168.41	1964.73
102452	94277.7	205.92	1697.85	1541.28	539.76	660.4	494	2973.36	850.08	636.02	2922.15	5474.7	3178.96	2299.69	2996.47
156421	70928.5	139.59	2010.69	1360.32	335.92	1063.92	4092.4	2428.4	1731.73	576.73	3227.84	4194.9	7393.61	4810.31	3273.76
63163	47007.2	140.58	2920.5	1267.76	354.64	1222	3408.08	1639.04	1995.84	1108.03	5870.48	4811.89	11538	6212.56	4623.87
90722.4	89115.8	169.29	2952.18	5394.48	1061.84	1259.44	8871.2	3440.32	3168.55	614.46	4851.77	5507.88	8440.36	7178.73	4242.3
123297	61442.4	261.36	1818.63	1523.6	392.08	951.6	8655.92	2186.08	3433.43	986.37	2731.19	4056.65	4387.66	5821.51	2678.1
140438	65573.6	187.11	2012.67	2250.56	598	885.04	4017.52	1613.04	2417.03	1037.19	4132.59	3509.97	4351.32	3261.91	3201.08
153935	64884.6	150.48	2409.66	1825.2	483.6	1113.84	5182.32	1669.2	2536.38	1101.87	9055.97	3318	8634.7	5571.08	3126.03
155078	79240.6	108.9	827.64	5325.84	1110.72	709.28	2471.04	3050.32	1396.78	538.23	5168.24	3789.63	1701.66	1580.79	1443.33
76957.3	55723.1	113.85	2358.18	3348.8	705.12	1164.8	4032.08	1840.8	1863.4	674.52	4896.43	5176.08	9542.41	5868.91	3665.6
117682	67715	156.42	4302.54	2972.32	569.92	1484.08	7087.6	2566.72	2545.62	1185.03	4761.68	6500.12	11274.1	7700.13	5854.69
88512.8	79399	221.76	3606.57	2525.12	691.6	1384.24	6236.88	3042	2705.01	989.45	4788.63	5808.87	10907.5	7865.24	5752.78
22372.2	53322.4	140.58	1457.28	3448.64	970.32	829.92	347.36	1921.92	1854.16	1452.99	6085.31	6751.34	3128.4	1683.49	2849.53
87936.8	47322	204.93	1301.85	1867.84	574.08	559.52	4607.2	1418.56	1919.61	338.8	2249.94	2584.88	2691.53	3220.04	2189.88
113087	71719.6	210.87	1893.87	748.8	368.16	712.4	3350.88	1986.4	1436.82	846.23	2966.04	3818.86	5213.21	3277.71	2677.31
138775	79694	202.95	2316.6	2397.2	556.4	889.2	7705.36	2367.04	3209.36	899.36	4342.8	3886.01	2195.41	5696.69	3561.32
72495	74237.1	124.74	2768.04	1873.04	470.08	1288.56	5736.64	1620.32	2326.17	1091.86	5340.72	4857.71	9002.05	5673.78	3503.65
118346	57123	127.71	3091.77	2051.92	574.08	1208.48	4379.44	2388.88	1898.05	1188.11	7006.23	4487.2	10472.2	6078.26	4734.47
142511	43896.6	110.88	2194.83	1929.2	383.76	1229.28	3034.72	1731.6	1284.36	1095.71	3607.45	4908.27	10089.9	5259.82	3510.76
223831	55918.2	218.79	3210.57	2028	645.84	1252.16	3495.44	1400.88	1622.39	495.88	2062.06	2818.72	11066.3	6548.31	4540.92
72922.7	93803.5	215.82	2285.91	4977.44	1129.44	1148.16	3798.08	2896.4	1485.33	332.64	3470.39	6632.05	6613.09	4232.03	3737.49
79257.7	61099.8	97.02	4016.43	3827.2	741.52	1895.92	4594.72	1530.88	2041.27	1359.82	5746.51	6015.85	16281.1	8719.23	5453.37
202370	207799	942.48	5159.88	4638.4	1508	1638	3715.92	4392.96	2267.65	3450.37	4657.73	14383.5	10035.4	5190.3	10677.6
141463	59046.6	185.13	2962.08	1722.24	497.12	1231.36	4851.6	2959.84	2266.11	926.31	8637.86	6422.7	8802.97	5372.79	4196.48
128420	48127.9	131.67	1675.08	1624.48	407.68	956.8	5918.64	2149.68	2677.29	661.43	5057.36	3758.03	4564.62	4481.67	2441.89
71922.3	137262	718.74	4790.61	1830.4	678.08	1342.64	1005.68	3106.48	1513.05	3106.95	4535.3	10788.2	7209.54	3163.16	9632.47
241659	214430	880.11	7592.31	3565.12	1419.6	2617.68	5758.48	5082.48	3818.43	4871.79	8350.65	15425.5	18546.8	9945.31	13979.8
162185	81049.3	247.5	2598.75	1733.68	546	1328.08	9511.84	2346.24	4038.65	847	7507.5	4838.75	7586.37	7070.5	3468.89
64461.4	39666.3	77.22	3976.83	2806.96	540.8	1547.52	4921.28	1841.84	1864.94	893.97	2389.31	10870.4	14479.1	7890.52	6082.21
93871.7	44598.5	76.23	2290.86	1549.6	410.8	1067.04	3192.8	2470	1776.39	859.32	7272.65	4979.37	9916.08	5785.96	3788.05
135710	76789.4	264.33	2961.09	2022.8	532.48	1356.16	3250	2321.28	1465.31	699.93	4100.25	4780.29	9273.81	5236.12	4554.35
152009	62211.6	170.28	2274.03	2728.96	681.2	1108.64	6718.4	3114.8	3122.35	538.23	5184.41	4720.25	7157.4	5844.42	3572.38
155205	70135.6	170.28	3656.07	2031.12	757.12	1702.48	3369.6	2039.44	1355.2	528.99	2825.13	5029.14	13251.5	7243.51	5110.51
180698	75986.5	201.96	1871.1	2073.76	544.96	832	3334.24	2611.44	1373.68	306.46	3833.83	3841.77	5356.99	3347.23	2842.42
133847	61427.5	162.36	751.41	4544.8	846.56	517.92	2642.64	3068	1851.08	581.35	4260.41	3533.67	1575.26	1887.31	1521.54
121361	60327.6	114.84	2003.76	2380.56	578.24	1000.48	5700.24	1678.56	2091.32	924	5456.99	4079.56	6363.45	4780.29	3062.04
188817	69280.2	208.89	785.07	2628.08	797.68	447.2	20.8	2631.2	465.85	356.51	3067.68	2527.21	1166.83	447.93	1317.72
135764	75146.9	141.57	882.09	1341.6	352.56	464.88	3394.56	1654.64	1690.92	434.28	3152.38	3742.23	1478.09	1749.06	1789.35
162915	47756.6	104.94	1893.87	1861.6	344.24	944.32	3811.6	2229.76	1319.78	633.71	4140.29	5256.66	8088.81	4766.07	2803.71
146047	64587.6	81.18	1907.73	1312.48	451.36	950.56	4066.4	2588.56	1540.77	701.47	3429.58	4883.78	6036.39	3865.47	3148.94
78972.6	92564	206.91	2803.68	4610.32	1001.52	1164.8	513.76	3247.92	894.74	818.51	5798.1	5563.97	10025.9	4224.92	4006.88
60425.2	40153.4	101.97	1783.98	950.56	393.12	784.16	3084.64	1877.2	1907.29	1019.48	5278.35	7790.98	5348.3	3813.33	3155.26
171414	71803.7	122.76	3801.6	2672.8	601.12	1862.64	5867.68	1371.76	2594.9	798.49	6297.06	4168.04	12863.6	7869.19	5392.54
156590	61123.6	223.74	2529.45	1287.52	475.28	1172.08	5637.84	2882.88	2872.87	2166.01	4195.73	5056.79	7121.06	5191.88	3780.15
260071	218129	504.9	7332.93	5036.72	1617.2	2928.64	6774.56	4792.32	3169.32	1525.37	5232.15	16447.8	21078.8	10977.8	11350.7
98459.5	68885.2	154.44	1453.32	1537.12	372.32	1002.56	4697.68	2378.48	2402.4	1131.9	4705.47	4690.23	3890.75	3607.93	2366.05
77205.1	62166.1	207.9	1245.42	1359.28	291.2	869.44	10035	2302.56	4893.35	839.3	4960.34	2830.57	2620.43	5591.62	1783.82
86523.4	95773.6	178.2	986.04	1827.28	561.6	667.68	2872.48	1957.28	1222.76	1653.19	2852.08	3519.45	1768.02	2095.87	1733.26
52674.3	77715	194.04	994.95	1671.28	473.2	490.88	208	1939.6	338.03	502.04	2565.64	5217.16	2050.84	747.34	2016.08
132003	53562	163.35	917.73	4174.56	733.2	487.76	3313.44	1940.64	1469.16	548.24	3527.37	4486.41	1764.07	2586.46	1544.45
163021	52709.6	126.72	1270.17	936	310.96	719.68	7081.36	1684.8	2530.22	797.72	3512.74	3414.38	3220.83	4239.14	1827.27
248448	207750	879.12	6604.29	4077.84	1537.12	2005.12	5114.72	5164.64	4201.89	3505.81	6429.5	14622.1	12194.4	7799.67	13452.9
96730.2	80968.1	263.34	4668.84	3453.84	936	1876.16	11523.2	3631.68	4673.9	1463	4595.36	7461.55	14817.2	10399.6	5637.44
120769	77112.1	221.76	3660.03	3744	929.76	1602.64	8301.28	2726.88	3472.7	1003.31	6813.73	5635.07	11636.7	8603.1	5016.5
73814.5	55868.7	100.98	1216.71	1428.96	414.96	719.68	4771.52	1289.6	1576.19	881.65	2802.03	2704.17	3261.91	3104.7	1820.16
114422	72938.2	214.83	2878.92	2532.4	661.44	1229.28	3818.88	2683.2	1959.65	877.03	5861.24	5216.37	9606.4	5800.18	4233.61
56973	40981.1	75.24	3692.7	2838.16	733.2	1275.04	3254.16	1844.96	1367.52	989.45	2652.65	11773.4	12784.6	6049.03	5713.28
87213.5	62490.8	96.03	2125.53	2370.16	523.12	1063.92	3996.72	1725.36	2323.09	978.67	5689.53	3779.36	8192.3	5420.19	3832.29
46740.2	45060.8	75.24	1547.37	2800.72	1257.36	1128.4	4028.96	1913.6	1915.76	1031.03	3405.71	8166.23	5341.19	3607.93	3149.73
230694	224009	780.12	6812.19	3560.96	1326	2579.2	4573.92	4217.2	2788.17	3110.8	4888.73	12544.4	15405	8163.86	11453.4
248115	228927	934.56	5819.22	1695.2	1033.76	2038.4	3949.92	4556.24	3092.32	3608.99	8423.03	15032.1	12131.2	6615.46	11511.9
184318	188917	962.28	7387.38	2025.92	968.24	2071.68	4075.76	5266.56	2335.41	4706.24	4959.57	17754.5	14340.9	7279.06	13837.6
126217	47932.8	86.13	1706.76	2299.44	517.92	726.96	4839.12	1968.72	2124.43	818.51	6530.37	3588.97	6916.45	4688.65	2955.39
99724.8	74155	133.65	3593.7	3224	791.44	1656.72	5262.4	2522	2822.82	1472.24	9699.69	6380.04	13859.8	7939.5	5111.3
85378.9	57815	157.41	1249.38	852.8	297.44	595.92	3616.08	1339.52	2112.88	792.33	6185.41	3179.75	3006.74	2996.47	2663.88
90589.6	71026.6	188.1	2765.07	2178.8	635.44	1397.76	9337.12	2269.28	3990.14	1077.23	5791.94	4438.22	8242.86	7841.54	4105.63
111202	67105.2	193.05	881.1	2735.2	673.92	520	180.96	2158	432.74	359.59	2865.94	6882.48	3019.38	1340.63	2324.97
127495	53535.2	184.14	2917.53	2353.52	504.4	1281.28	3338.4	1208.48	1461.46	594.44	3260.95	4215.44	9972.17	5333.29	4661
153739	60672.2	129.69	1168.2	3519.36	845.52	605.28	4198.48	2887.04	2299.22	656.81	6796.79	5144.48	2428.46	2748.41	1812.26
237244	198121	1040.49	8574.39	2839.2	1190.8	2621.84	6195.28	5796.96	3978.59	4382.84	6309.38	17989.9	19628.3	10535.4	14743.8
103324	58478.3	109.89	1826.55	1480.96	377.52	673.92	4113.2	2251.6	1995.84	736.89	4682.37	3783.31	5606.63	3794.37	3310.1
174504	62240.3	185.13	3630.33	3706.56	781.04	1240.72	5393.44	1859.52	2072.84	1024.87	8141.21	3500.49	12350.9	7675.64	4288.12
165337	87985.3	150.48	3266.01	2080	509.6	1576.64	2387.84	2043.6	1051.05	648.34	3324.86	4818.21	12108.3	5714.86	4770.81
138615	71616.6	146.52	3566.97	2165.28	663.52	1578.72	3599.44	3042	1500.73	693.77	4136.44	7763.33	12751.4	6793.21	5320.65
19186.5	52419.5	198	1615.68	1064.96	313.04	830.96	7106.32	2448.16	2884.42	992.53	4911.83	7507.37	3946.84	4048.75	3051.77
49753.4	68062.5	80.19	1450.35	1687.92	429.52	679.12	5654.48	1641.12	2346.96	621.39	3873.87	1980.53	4014.78	4108.79	1838.33
147147	67219	64.35	1650.33	1017.12	362.96	768.56	4825.6	1692.08	2286.9	1275.12	5798.1	4375.81	4379.76	3521.03	3325.11
103551	69074.3	183.15	1682.01	1152.32	552.24	632.32	6874.4	2761.2	2393.16	902.44	4265.8	4783.45	3281.66	3929.46	3165.53
84852.4	71657.2	211.86	3778.83	3584.88	719.68	1500.72	5622.24	2886	2311.54	743.82	3958.57	5275.62	12284.5	7260.1	5665.09
112969	49059.4	132.66	3392.73	2787.2	628.16	1549.6	6217.12	1810.64	2395.47	930.93	5075.84	4102.47	11566.4	7464.71	4721.83
93706.5	65492.5	101.97	2883.87	2181.92	540.8	916.24	3824.08	3071.12	1596.98	584.43	3342.57	8028.77	8788.75	4936.71	4121.43
Single Cells
Patient 12: Sarcoidosis
97639.8	108171	306.9	7728.93	4957.68	974.48	2019.68	17382.6	3589.04	8398.39	2520.98	7316.54	4597.01	13936.4	19657.6	11508.7
88883.7	54674.7	204.93	3223.44	4563.52	994.24	1620.32	7581.6	3031.6	3773.77	1903.44	13015.3	2488.5	11003.1	7622.71	4018.73
123559	78520.9	216.81	1100.88	3618.16	700.96	695.76	689.52	2489.76	1171.94	821.59	4548.39	2723.13	1016.73	2402.39	2579.35
71498.7	64648	226.71	2566.08	3502.72	854.88	1054.56	3108.56	1905.28	1797.18	944.02	6541.15	3068.36	9656.17	5405.97	3926.3
111293	69854.4	126.72	3544.2	4274.4	826.8	1808.56	4556.24	2748.72	2591.82	606.76	7556.78	4692.6	13543.8	7617.18	4541.71
126888	56563.7	87.12	2419.56	4115.28	772.72	1238.64	4155.84	2367.04	1964.27	1144.99	9926.84	4399.51	9969.01	5376.74	3642.69
105614	53152.1	101.97	2873.97	4052.88	855.92	1693.12	4353.44	1519.44	1647.8	621.39	7304.99	3857.57	12258.4	6924.35	4450.07
79834.4	54972.7	113.85	4122.36	4290	852.8	1587.04	4381.52	2274.48	2724.26	1086.47	9373.98	3959.48	13659.1	8900.93	6103.54
81304.6	64736.1	44.55	742.5	2799.68	591.76	370.24	1991.6	1844.96	927.08	310.31	3552.78	1671.64	2188.3	1577.63	991.45
123689	69836.6	167.31	1807.74	3507.92	687.44	1079.52	3953.04	1825.2	1847.23	324.17	5681.06	2576.98	7263.26	4550.4	2682.84
93101.4	84409.4	246.51	1676.07	5131.36	1077.44	498.16	419.12	2144.48	1912.68	1174.25	7420.49	2223.06	1050.7	3306.94	3491.01
25789.6	56127.1	115.83	2714.58	4447.04	837.2	1555.84	6666.4	2504.32	3005.31	1396.01	8827.28	4040.85	10337.1	7167.67	3973.7
92458.3	80232.6	208.89	6237.99	4897.36	1094.08	2400.32	9873.76	2645.76	3555.09	1238.93	5316.08	6361.08	20344.9	14433.3	9329.11
48756.3	89757.4	222.75	2383.92	3762.72	787.28	767.52	7081.36	2697.76	3769.92	853.16	5929.77	2967.24	2507.46	6599.66	4124.59
89072.5	56220.1	137.61	2612.61	3377.92	744.64	1413.36	5573.36	2380.56	2165.24	910.14	8185.1	3407.27	8761.1	7140.02	4235.19
102128	62870.9	169.29	3717.45	4855.76	1167.92	1701.44	3780.4	1416.48	2110.57	860.09	7455.14	2941.17	13554.8	7408.62	5060.74
104498	57984.3	186.12	2670.03	4579.12	745.68	276.64	589.68	2716.48	2788.17	1200.43	7066.29	1643.99	738.65	5628.75	4830.85
182892	63816.4	170.28	4721.31	5097.04	1285.44	1862.64	6792.24	2428.4	4061.75	1228.92	4756.29	5331.71	14327.4	10873.6	7283.01
76353.8	83300.6	162.36	3547.17	4398.16	905.84	1644.24	7852	2297.36	3210.13	735.35	4015.55	4069.29	13208.8	8833.78	4807.15
110655	79930.6	232.65	3006.63	4961.84	1162.72	975.52	8796.32	2991.04	4679.29	1439.9	4198.04	2834.52	2533.53	7935.55	4539.34
128367	109278	415.8	3229.38	5143.84	1509.04	2188.16	4713.28	1515.28	2560.25	1093.4	6171.55	4226.5	11195.9	6901.44	4356.06
178771	73596.6	69.3	1938.42	4281.68	905.84	425.36	748.8	2013.44	1671.67	959.42	4535.3	1626.61	729.17	3882.06	3150.52
133232	69504.9	123.75	1222.65	3412.24	720.72	600.08	113.36	1914.64	1135.75	747.67	5428.5	2922.21	1423.58	2066.64	2121.15
166980	58942.6	124.74	4903.47	4785.04	1094.08	1804.4	10335.5	2626	4928.77	693.77	6008.31	4475.35	14379.6	11933.7	5808.08
85786.3	85001.4	109.89	2800.71	4435.6	804.96	1343.68	9741.68	2872.48	3663.66	1062.6	7035.49	6071.94	9739.91	7881.83	3848.88
166490	66875.5	165.33	1704.78	3427.84	711.36	962	9679.28	1768	3826.9	696.08	4956.49	3024.91	4816.63	5653.24	2817.14
132827	76116.1	169.29	4129.29	3667.04	730.08	1054.56	811.2	2603.12	1977.36	1069.53	6682.83	3168.69	8377.16	7108.42	5809.66
83021.8	73727.3	62.37	1846.35	3671.2	659.36	780	5699.2	2618.72	2876.72	473.55	6275.5	3659.28	6115.39	5173.71	2738.14
78302.7	72605.6	152.46	950.4	3452.8	748.8	515.84	2280.72	2039.44	1422.19	571.34	3783.78	3179.75	1388.82	1590.27	1646.36
144735	104812	143.55	3350.16	6064.24	1326	600.08	8114.08	2375.36	5654.11	1898.82	8464.61	2909.57	1470.19	10249.5	4913.8
109856	83993.6	180.18	3929.31	5988.32	1338.48	1747.2	10730.7	2912	5099.71	977.9	6230.07	3989.5	10420.1	11166.6	5992.94
130904	101232	159.39	3552.12	4334.72	1016.08	1821.04	9686.56	3932.24	3649.03	642.18	4368.98	5131.05	13199.3	9550.31	4500.63
79348.4	90023.7	89.1	2906.64	4258.8	976.56	1294.8	8674.64	3158.48	4047.89	1382.15	7377.37	4387.66	5161.07	6708.68	4676.01
133831	65090.5	139.59	3697.65	3815.76	681.2	1751.36	6286.8	2128.88	2775.85	887.04	8568.56	4488.78	13714.4	8259.45	4483.25
96505	54248	202.95	1985.94	3478.8	803.92	952.64	5571.28	1686.88	2684.22	1269.73	4894.12	2689.95	7069.71	5277.2	3063.62
104688	72430.4	138.6	582.12	3139.76	750.88	386.88	1705.6	2067.52	1121.89	227.92	4154.15	1692.18	857.94	796.32	1085.46
98468.5	69627.7	136.62	1969.11	4282.72	873.6	820.56	579.28	1451.84	495.88	348.81	3173.94	1687.44	6124.08	3396.21	3433.34
55335.2	189151	293.04	5134.14	3383.12	1459.12	2222.48	1080.56	3320.72	1190.42	10681.4	5854.31	9168.74	14559.7	6687.35	9365.45
74912	79766.3	208.89	1420.65	3696.16	845.52	872.56	6150.56	2513.68	2590.28	3367.98	4369.75	3397.79	1811.47	3456.25	2580.93
80197.3	89203.9	147.51	6963.66	4475.12	896.48	2366	8251.36	3529.76	5624.08	1775.62	7643.02	7092.62	18594.2	16308	10371.9
92475.3	92163.1	151.47	2492.82	4039.36	877.76	822.64	7548.32	1688.96	4239.62	1417.57	3942.4	1871.51	1004.88	7222.18	4080.35
57731.1	66232	215.82	2682.9	4644.64	948.48	1150.24	10728.6	3296.8	4653.88	1548.47	6089.16	5574.24	5387.8	8506.72	4702.87
131423	67427.9	189.09	2553.21	3385.2	861.12	1020.24	5753.28	2273.44	3408.79	1015.63	4730.11	2427.67	4567.78	6346.86	3765.93
73859.9	94621.2	153.45	5477.67	4429.36	874.64	2447.12	4284.8	2335.84	1359.05	285.67	4579.19	5693.53	21939.9	10467.5	6575.17
157772	70295.9	266.31	3124.44	3350.88	789.36	1421.68	7819.76	2254.72	3139.29	583.66	4413.64	2495.61	9203.5	6857.2	4222.55
157577	64284.7	178.2	4298.58	3329.04	811.2	1822.08	6954.48	2681.12	3367.21	838.53	7863.24	5029.93	16761.4	10690.3	5807.29
48879.4	105035	170.28	972.18	6111.04	1287.52	771.68	7272.72	2208.96	2597.98	495.88	5621.77	2456.9	1222.13	3103.12	1205.54
94851	79378.2	187.11	2235.42	4429.36	966.16	940.16	6858.8	2741.44	3811.5	872.41	6357.12	2371.58	3282.45	5985.04	2896.14
99656.7	65753.8	99	2451.24	2332.72	607.36	1101.36	5881.2	1526.72	2044.35	339.57	3123.89	2225.43	8210.47	5976.35	2905.62
126909	80346.4	114.84	4113.45	4636.32	1096.16	1783.6	10425	3984.24	4817.12	1171.94	10234.1	4500.63	10900.4	10871.2	5548.96
100141	52563.1	12.87	2146.32	3157.44	644.8	981.76	3332.16	1597.44	1760.99	555.17	6090.7	2202.52	7988.48	4766.86	2601.47
87686.6	44331.2	94.05	1469.16	3877.12	748.8	924.56	3410.16	1833.52	1687.07	442.75	4050.97	1423.58	4856.92	3108.65	1899.16
121080	260580	822.69	7032.96	4329.52	1302.08	2657.2	8129.68	4598.88	3498.88	4292.75	5950.56	13068.2	17692.8	10217.1	11563.2
112312	66149.8	129.69	2367.09	4871.36	998.4	1182.48	6174.48	3215.68	3056.9	1231.23	9466.38	4487.99	9356.76	6577.54	3668.76
90242.1	75192.5	142.56	4677.75	3553.68	730.08	2203.76	4561.44	2120.56	2383.92	769.23	7151.76	4356.06	15861.6	8964.13	6079.05
71255.7	78669.4	198.99	4322.34	4629.04	1030.64	1827.28	4992	2858.96	2345.42	912.45	8352.96	4825.32	16705.3	9084.21	5959.76
95991.5	64410.4	141.57	2962.08	3255.2	648.96	1179.36	6281.6	1996.8	3450.37	903.98	4928.77	2681.26	7255.36	7531.86	4307.87
85387	63788.7	53.46	2398.77	3999.84	850.72	1237.6	3756.48	1895.92	1888.81	846.23	6284.74	4096.94	10195	5948.7	3611.88
55048.4	96947.7	185.13	4393.62	4647.76	1210.56	1352	11445.2	2675.92	5468.54	1489.18	4519.13	4152.24	7778.34	11523.7	6274.18
94799.2	63810.4	111.87	3576.87	4248.4	660.4	1728.48	3849.04	1832.48	1924.23	703.78	9613.45	3295.09	14526.5	7573.73	4688.65
102471	55238	130.68	2995.74	2834	559.52	1149.2	6261.84	2440.88	2733.5	672.21	4091.01	3342.49	10701.3	7426	4524.33
88054.3	48273.4	109.89	3293.73	2695.68	600.08	1289.6	3845.92	1870.96	1544.62	739.97	5251.4	3526.56	12081.5	6361.87	4822.95
152254	45840	100.98	2055.24	3346.72	698.88	1030.64	3126.24	1905.28	1990.45	797.72	9497.95	2558.02	7647.2	4575.68	2556.44
25473.7	95215.2	198.99	1734.48	4697.68	1028.56	688.48	7675.2	1783.6	3747.59	699.93	3209.36	2022.4	1270.32	5582.93	2556.44
116812	71209.7	154.44	2977.92	4859.92	1056.64	796.64	11172.7	3363.36	6580.42	1071.07	6735.19	2174.87	1499.42	9977.7	4343.42
223623	81243.4	97.02	556.38	3523.52	695.76	355.68	177.84	2424.24	426.58	281.05	4259.64	2230.17	1088.62	293.88	814.49
111257	74986.6	192.06	1987.92	2606.24	657.28	1159.6	4010.24	2297.36	1986.6	431.2	5172.09	3867.84	7309.87	5083.65	2922.21
92149.6	103881	164.34	3988.71	4101.76	895.44	2081.04	11545	2283.84	5302.22	1050.28	5588.66	4328.41	13768.9	11448.7	5709.33
153770	63001.6	82.17	2302.74	3765.84	693.68	1174.16	3918.72	1205.36	1265.88	782.32	6086.08	1999.49	7726.99	4465.08	3078.63
74526.5	64889.6	181.17	2406.69	2964	683.28	1016.08	4760.08	1570.4	2381.61	703.01	4282.74	3239.79	8811.66	6135.93	3151.31
91926.9	60003.9	72.27	1147.41	1941.68	439.92	488.8	3839.68	1326	1754.06	257.95	2975.28	1587.11	3242.16	2812.4	1222.13
155073	63934.2	230.67	2701.71	3840.72	864.24	1069.12	14854.3	3369.6	6756.75	1155.77	10681.4	3071.52	2256.24	8750.83	3716.95
130390	66526	178.2	8054.64	3392.48	815.36	3123.12	2680.08	2986.88	1437.59	490.49	5135.13	7286.17	33962.1	15236.7	11381.5
59577.9	98495.1	122.76	2254.23	3831.36	777.92	975.52	596.96	1407.12	517.44	206.36	3623.62	4029.79	8312.38	3933.41	3518.66
123133	78053.6	149.49	5283.63	5317.52	1139.84	2051.92	4254.64	2309.84	1399.09	502.81	4767.07	5741.72	23087.8	11477.1	7142.39
177912	81527.5	166.32	2039.4	4935.84	1078.48	1460.16	12818	3496.48	4807.11	800.8	6273.96	3125.24	6211.77	7429.16	2757.89
106461	63565.9	169.29	1281.06	3389.36	989.04	886.08	7469.28	2109.12	2706.55	403.48	3405.71	2535.11	4407.41	5250.34	1835.96
87036.1	72693.7	122.76	1168.2	3744	781.04	708.24	9056.32	1594.32	3577.42	599.06	5585.58	1098.1	2676.52	4514.06	1750.64
106412	62392.8	99	2019.6	2233.92	497.12	1060.8	3830.32	1185.6	1300.53	1017.17	4473.7	2719.97	8456.16	5157.91	3528.14
73711.6	73678.8	112.86	3110.58	4561.44	840.32	1226.16	5047.12	2656.16	2333.1	1323.63	6867.63	4822.16	11744.1	7173.99	3897.07
127836	87227.9	249.48	4299.57	4095.52	958.88	1702.48	11426.5	3643.12	5306.84	1148.84	6632.78	4551.98	11148.5	11990.6	6504.86
111182	66356.7	89.1	2307.69	4784	845.52	1077.44	6495.84	2397.2	2754.29	971.74	6997.76	3389.89	8253.13	6014.27	3618.99
48041.9	69338.6	137.61	1635.48	4238	746.72	497.12	3335.28	1686.88	2690.38	903.98	4579.19	1983.69	972.49	4094.57	2405.55
67300.5	24353	56.43	503.91	1690	325.52	338	2559.44	1005.68	1365.21	392.7	3946.25	2199.36	1493.1	1615.55	928.25
15615.2	85176.6	196.02	3366	5166.72	1097.2	1279.2	5332.08	3210.48	2996.84	888.58	5024.25	3927.88	9179.01	7364.38	5420.98
123372	75746.9	145.53	2950.2	3653.52	777.92	1498.64	3979.04	1891.76	2865.17	696.85	8484.63	2596.73	11577.5	7049.96	4179.1
121727	214686	676.17	4620.33	3308.24	1217.84	1859.52	8014.24	4457.44	4463.69	4134.9	10792.3	9923.98	9791.26	7260.1	8930.16
97621.2	82885.8	106.92	883.08	4069.52	611.52	522.08	1948.96	3585.92	1201.2	1060.29	5950.56	2020.82	2023.98	1485.99	1172.36
101512	78159.5	144.54	1685.97	2757.04	671.84	430.56	3479.84	1943.76	2286.9	1678.6	4066.37	2102.98	1168.41	4338.68	3058.88
123757	98793.1	169.29	1814.67	3071.12	757.12	925.6	5921.76	3032.64	2373.91	1623.16	5919.76	4407.41	6034.81	4961.99	2523.26
154780	106989	156.42	920.7	4786.08	1180.4	592.8	4099.68	3198	2212.98	744.59	7849.38	2765	1390.4	2464.8	1249.78
71319.7	108792	258.39	2125.53	5176.08	1180.4	1071.2	668.72	2924.48	780.01	199.43	3620.54	4211.49	8086.44	3877.32	3047.82
80286.4	55182.6	94.05	3669.93	3214.64	624	1557.92	5373.68	2374.32	2360.05	693	4626.16	4891.68	14063.6	7896.05	4867.19
146906	70341.5	145.53	3587.76	4516.72	887.12	1638	7292.48	2601.04	2990.68	861.63	6980.05	3953.95	11759.9	8100.66	4623.08
112891	66685.4	165.33	2713.59	4647.76	973.44	1449.76	4130.88	2148.64	1783.32	696.85	6537.3	4238.35	10350.6	6209.4	4036.11
119187	53992.6	54.45	467.28	4475.12	965.12	416	4189.12	3110.64	2052.05	298.76	4977.28	1696.92	1034.11	2319.44	814.49
157166	86488.4	203.94	1568.16	5052.32	1310.4	801.84	4044.56	2134.08	2648.8	1078.77	6602.75	2633.86	1219.76	4131.7	2648.87
57257.3	56292.4	100.98	1661.22	3560.96	789.36	940.16	4143.36	2103.92	1806.42	855.47	9139.13	3706.68	7448.91	4661.79	3031.23
149609	82068	196.02	1315.71	3302	737.36	735.28	3312.4	2648.88	1580.81	363.44	7106.33	2746.04	3780.15	3172.64	1824.11
134686	52442.3	84.15	2061.18	3655.6	740.48	996.32	7377.76	2300.48	2981.44	570.57	7607.6	3462.57	7025.47	5816.77	2556.44
Single Cells
Patient 13: Sarcoidosis
88599.4	74645	99.99	600.93	3979.04	972.4	376.48	171.6	3237.52	661.43	454.3	5034.26	2780.8	1291.65	566.43	1269.53
183027	98002.1	322.74	2135.43	7393.36	1679.6	1244.88	730.08	3947.84	1350.58	1041.81	8469.23	4593.06	3269.81	2264.93	2981.46
77676.6	59364.4	226.71	2993.76	4119.44	923.52	1762.8	11414	2174.64	4370.52	660.66	3485.79	6998.61	10904.4	9014.69	4179.89
114878	56896.3	126.72	3091.77	1946.88	529.36	1700.4	13979.7	2234.96	5352.27	742.28	7368.13	6727.64	10716.4	9573.22	4341.05
79592.2	70131.6	160.38	1042.47	4533.36	1219.92	755.04	682.24	4290	362.67	516.67	5138.98	6835.87	3680.61	1320.09	2581.72
66981.3	80577.1	105.93	606.87	3139.76	911.04	605.28	350.48	2711.28	267.19	349.58	2746.59	2176.45	1019.89	338.91	961.43
94358.5	42130.4	197.01	2056.23	2093.52	539.76	869.44	7510.88	2100.8	3203.2	677.6	4527.6	3535.25	5290.63	5999.26	3025.7
106394	55992.4	191.07	3051.18	3529.76	947.44	1795.04	9187.36	2355.6	3437.28	759.22	3401.09	4841.12	10084.4	8468.01	4701.29
115982	56032	134.64	1367.19	4871.36	1155.44	893.36	3750.24	3604.64	1657.04	564.41	4574.57	4446.12	2291	2324.97	2227.01
210597	54171.8	167.31	2149.29	5056.48	1194.96	1321.84	826.8	1844.96	555.17	510.51	4258.1	4434.27	9194.02	4152.24	3287.19
57325.3	65902.3	223.74	4940.1	4691.44	1084.72	2308.8	9579.44	2535.52	4027.87	1430.66	9613.45	5029.14	17426.6	11029.2	6466.94
146471	70252.4	192.06	984.06	5264.48	1249.04	622.96	520	2574	580.58	770.77	2887.5	5140.53	2159.07	1182.63	2203.31
261809	213840	1208.79	6399.36	4296.24	1947.92	2675.92	1451.84	5767.84	2294.6	4687.76	5398.47	14650.6	12786.2	6820.07	12870.7
88813.3	43263	206.91	3698.64	2423.2	799.76	1514.24	9516	2416.96	4228.07	816.2	4020.94	5558.44	10356.9	8699.48	5464.43
122494	64360.9	89.1	854.37	3018.08	830.96	588.64	513.76	1905.28	824.67	405.79	5255.25	3125.24	1759.33	1113.11	1286.91
103870	153811	530.64	3714.48	4646.72	1379.04	1600.56	1317.68	3699.28	1555.4	1943.48	6673.59	7280.64	9009.95	4422.42	6617.83
193343	202178	687.06	6891.39	4226.56	1677.52	2630.16	4424.16	5295.68	2930.62	2899.82	7263.41	12631.3	16895.7	8943.59	11570.3
163839	55664.7	163.35	1596.87	4215.12	1022.32	739.44	420.16	2650.96	1109.57	584.43	5636.4	3577.91	2100.61	2087.18	2386.59
130956	71920.5	92.07	619.74	3391.44	971.36	641.68	390	2357.68	536.69	273.35	2845.92	3623.73	1557.09	853.2	1203.96
100234	55872.6	154.44	5932.08	4354.48	1115.92	2163.2	11670.9	3076.32	4598.44	1651.65	7189.49	5373.58	16393.3	13460	8670.25
230614	178517	642.51	5109.39	2347.28	1424.8	1931.28	4503.2	4022.72	3040.73	2851.31	4923.38	10125.4	11298.6	6841.4	9270.65
43879.3	68613.9	174.24	1003.86	2375.36	845.52	510.64	515.84	2424.24	391.16	247.17	3479.63	3316.42	2420.56	1222.92	1610.02
215965	168333	628.65	3119.49	4415.84	1549.6	1406.08	1069.12	3549.52	2202.2	2970.66	8041.11	9111.86	6128.03	3043.08	6662.86
151660	81871	177.21	1059.3	3985.28	1051.44	770.64	367.12	2147.6	454.3	463.54	4659.27	4183.05	2297.32	912.45	1478.09
135813	77525.9	242.55	3923.37	4493.84	1095.12	1914.64	8258.64	3454.88	3231.69	378.07	3682.14	5794.65	13644.9	8604.68	5298.53
254522	188590	808.83	7001.28	4481.36	1849.12	2555.28	1374.88	5422.56	1801.8	2821.28	6601.21	14872.5	18682.7	8666.3	11650.9
191209	58956.5	132.66	1973.07	3908.32	1112.8	637.52	434.72	2951.52	800.8	622.16	3009.93	4281.01	2303.64	2603.05	3160.79
77815.9	89703.9	100.98	946.44	2408.64	575.12	455.52	402.48	2530.32	390.39	234.85	2776.62	2569.87	1207.91	1196.06	1920.49
231941	152608	368.28	5451.93	5509.92	2147.6	2689.44	7114.64	5959.2	2968.35	1294.37	5773.46	11914.8	21213.9	11385.5	8433.25
75031.1	80455.3	203.94	1478.07	3729.44	1044.16	967.2	427.44	2934.88	729.96	438.13	4252.71	3328.27	4442.96	2262.56	2298.9
172667	54043.1	192.06	1185.03	2242.24	804.96	750.88	5052.32	1976	2817.43	469.7	4164.93	3161.58	2406.34	3117.34	1828.06
188922	168552	551.43	4263.93	3157.44	1584.96	2058.16	530.4	4240.08	1206.59	2099.02	3967.81	9111.07	12745.9	5955.81	7640.09
191073	165929	716.76	5852.88	2156.96	1226.16	2467.92	7223.84	4207.84	3437.28	3045.35	4443.67	11887.1	15156.9	9161.63	9769.93
106164	72558.1	181.17	968.22	4219.28	1037.92	782.08	710.32	2537.6	607.53	455.07	5734.19	3573.17	2543.8	1281.38	1567.36
45097.6	42352.2	132.66	2003.76	2187.12	617.76	1010.88	6010.16	1810.64	2236.08	570.57	5254.48	2987.78	7162.93	5330.92	2649.66
131306	41969.1	126.72	635.58	2688.4	790.4	235.04	429.52	1121.12	763.07	259.49	2499.42	963.8	349.97	1166.83	1160.51
231056	180076	661.32	4436.19	4121.52	1337.44	1504.88	957.84	5514.08	1054.13	3104.64	5390.77	10797.7	9047.08	4065.34	9061.3
72893.5	59716.8	35.64	2436.39	2182.96	604.24	1231.36	11341.2	2136.16	4322.78	354.97	4043.27	3083.37	8677.36	8492.5	3539.99
95524.9	66768.6	54.45	729.63	2808	661.44	587.6	346.32	3066.96	308	532.07	3267.11	4033.74	1805.94	561.69	1319.3
44802.7	84968.7	284.13	3112.56	2970.24	962	1144	738.4	4602	1727.11	995.61	6273.19	11027.6	5969.24	5548.96	5142.9
27839.7	46751.8	152.46	1760.22	4287.92	1042.08	1029.6	7731.36	3397.68	3655.96	1121.89	6885.34	2480.6	2366.84	5083.65	2798.18
109111	60351.4	167.31	2674.98	2378.48	859.04	1359.28	4402.32	2018.64	1698.62	525.14	4882.57	4331.57	9292.77	5352.25	3794.37
98094.2	70045.5	119.79	916.74	2279.68	745.68	820.56	1274	2384.72	606.76	278.74	3136.21	3341.7	1677.96	916.4	1724.57
170898	71642.3	166.32	1464.21	4741.36	1160.64	1134.64	457.6	2098.72	430.43	503.58	4299.68	4081.93	4790.56	1821.74	2507.46
122101	154378	259.38	7995.24	4233.84	1538.16	3529.76	8079.76	4046.64	3701.39	1462.23	5144.37	13222.2	30829	16210.8	12165.2
141040	51534.4	120.78	3210.57	2167.36	674.96	1569.36	12396.8	2713.36	4372.06	479.71	7210.28	4378.18	10116	8419.03	4053.49
113583	48627.8	148.5	4513.41	2388.88	593.84	2164.24	9327.76	2400.32	4123.35	802.34	5247.55	4800.83	15795.3	10706.9	5644.55
96437	43365	136.62	491.04	2679.04	968.24	572	568.88	1976	512.05	250.25	3500.42	2382.64	1103.63	526.93	805.01
97670.6	62219.5	140.58	4602.51	4841.2	1145.04	2320.24	7500.48	3453.84	2402.4	752.29	7441.28	6011.11	19547.8	10798.5	6945.68
165028	66035	144.54	741.51	4392.96	1200.16	631.28	439.92	1703.52	477.4	534.38	4189.57	2311.54	1306.66	587.76	1345.37
102357	61562.2	178.2	3100.68	4162.08	843.44	1051.44	2986.88	4194.32	2937.55	1113.42	9353.19	3862.31	6400.58	6328.69	4553.56
80443.5	79521.8	192.06	4114.44	3815.76	1098.24	2187.12	13173.7	2696.72	5441.59	1039.5	6046.04	4396.35	13423.7	11625.6	5386.22
125820	66800.2	206.91	1682.01	4088.24	1269.84	1077.44	4186	2630.16	2663.43	816.2	6407.94	1576.05	853.2	4901.95	2849.53
126742	57575.4	149.49	1811.7	4205.76	941.2	1163.76	617.76	2293.2	706.86	490.49	4331.25	3769.09	6489.06	2831.36	2887.45
258332	165469	846.45	7926.93	4196.4	1691.04	3085.68	12110.8	5074.16	4623.85	3280.97	5843.53	14539.2	22500.8	14421.5	12354
136912	194067	918.72	10573.2	3286.4	1486.16	3889.6	15862.1	4220.32	6248.55	3938.55	7025.48	13140.9	30292.6	18578.4	16520.5
89351.9	33496.6	121.77	951.39	1933.36	739.44	578.24	2089.36	1842.88	1586.2	891.66	3396.47	5142.9	1928.39	2051.63	1989.22
54241.6	71794.8	126.72	657.36	2927.6	856.96	350.48	330.72	2237.04	518.21	233.31	3081.54	4550.4	2052.42	697.57	1791.72
93771.3	61046.4	147.51	2700.72	3185.52	839.28	1033.76	4696.64	2015.52	2506.35	868.56	2772	2304.43	4826.11	6116.97	3968.17
217022	66563.6	279.18	4833.18	3489.2	1130.48	2139.28	1372.8	3616.08	1406.79	516.67	7098.63	9029.7	19214.4	9499.75	7542.92
165494	144705	328.68	3337.29	4539.6	1675.44	1674.4	906.88	3523.52	901.67	1104.18	5412.33	10031.4	8362.94	3765.14	5250.34
77206.8	63822.3	119.79	707.85	4195.36	964.08	476.32	148.72	1913.6	301.07	635.25	3020.71	2390.54	1508.11	706.26	1587.9
44998.7	66256.7	225.72	1642.41	2773.68	757.12	876.72	6452.16	3144.96	3460.38	698.39	8496.95	7407.83	3644.27	4566.99	2509.04
156808	58262.5	126.72	1161.27	3693.04	889.2	640.64	383.76	1997.84	752.29	475.09	6675.9	2425.3	3185.28	1531.81	1880.2
130331	51460.2	156.42	2491.83	3107.52	704.08	620.88	6517.68	2863.12	4621.54	1443.75	7857.08	2342.35	1200.8	6643.9	4046.38
96241	55590.5	150.48	3835.26	2608.32	839.28	1841.84	10182.6	2423.2	4229.61	1114.19	6282.43	4875.09	11430.5	9730.43	5249.55
16494.8	54939.1	180.18	1386	4328.48	1233.44	807.04	574.08	2950.48	733.04	489.72	3562.02	10344.3	4115.11	1913.38	2686
81022.7	59317.8	134.64	2363.13	3208.4	686.4	1057.68	6177.6	3063.84	2312.31	513.59	3970.89	3945.26	5416.24	5568.71	3360.66
164906	140155	411.84	8250.66	5072.08	1995.76	3802.24	7660.64	5254.08	2825.9	1777.16	5492.41	16266.1	27615.2	13870	12087
163933	80016.8	140.58	1235.52	2483.52	744.64	849.68	541.84	1613.04	993.3	272.58	4124.12	3537.62	3020.17	1330.36	1904.69
109944	90568.2	219.78	845.46	3407.04	985.92	683.28	174.72	2593.76	216.37	411.95	2865.94	3769.09	1862.03	672.29	1738.79
57050.7	60757.3	123.75	1968.12	3036.8	689.52	990.08	739.44	2671.76	515.13	331.87	4697.77	3359.87	8113.3	3356.71	3096.8
92399.9	56979.4	99	1079.1	5289.44	1135.68	814.32	3781.44	3113.76	1951.95	559.02	5473.16	3596.87	2172.5	2387.38	1663.74
89789.3	47688.3	134.64	1951.29	2337.92	652.08	1165.84	6241.04	2451.28	2182.95	602.14	3472.7	3092.85	5603.47	4879.83	2897.72
217859	192778	875.16	8768.43	4810	1750.32	3098.16	13272.5	6113.12	5755.75	4720.87	6421.8	18269.5	20538.4	14908.9	14010.7
77712.2	76971.5	260.37	1801.8	3548.48	981.76	560.56	487.76	2017.6	752.29	636.79	2540.23	3716.16	1794.88	1905.48	3087.32
103462	56453.8	86.13	1726.56	2101.84	555.36	265.2	444.08	3091.92	244.86	600.6	3546.62	3852.83	1613.97	867.42	3524.19
103907	59512.9	111.87	828.63	2898.48	803.92	359.84	399.36	3698.24	469.7	189.42	3463.46	3887.59	1733.26	727.59	1399.09
213172	204015	867.24	7752.69	2671.76	1530.88	2980.64	6858.8	6004.96	3289.44	3786.86	5522.44	15939.8	19859	11353.9	13798.1
46899.8	67470.5	141.57	980.1	4048.72	1239.68	657.28	355.68	2119.52	257.18	438.13	4161.08	3327.48	1437.8	463.73	1753.8
82941.6	57526.9	166.32	864.27	2372.24	648.96	587.6	5992.48	2831.92	2333.87	468.16	4349.73	2060.32	1339.05	2659.93	1134.44
249430	182636	723.69	4772.79	3654.56	1610.96	2066.48	781.04	4805.84	1635.48	2899.05	8359.12	11588.5	12366.7	5621.64	8877.23
80495.4	51550.3	113.85	1582.02	2649.92	625.04	1057.68	6606.08	2243.28	3435.74	557.48	5746.51	3513.92	4662.58	4855.34	2500.35
125944	206388	494.01	5969.7	7424.56	2529.28	3136.64	18736.6	6737.12	8040.34	2084.39	7897.89	11640.7	11614.6	14340.9	8769.79
98385.8	55382.6	162.36	4828.23	3617.12	910	2038.4	9666.8	2288	4139.52	847	5194.42	5023.61	16658.7	11413.1	6345.28
146362	65784.5	165.33	926.64	5093.92	1287.52	426.4	305.76	2097.68	658.35	455.07	2954.49	3054.93	1283.75	1249.78	1811.47
114496	48811.9	85.14	2013.66	3640	936	844.48	3569.28	2723.76	2806.65	762.3	5518.59	3072.31	3894.7	5444.68	3358.29
22985.4	84548	218.79	3728.34	3812.64	942.24	1486.16	9199.84	3799.12	5088.16	1918.84	6598.9	5676.94	6015.06	10035.4	5943.96
151984	46762.7	216.81	1259.28	2657.2	848.64	870.48	8234.72	2982.72	2561.02	649.88	4459.07	2593.57	1617.13	4235.98	1653.47
143257	91987.8	267.3	1069.2	4356.56	1160.64	790.4	321.36	2232.88	806.96	372.68	3556.63	3838.61	2064.27	846.09	1712.72
167348	66865.6	198	4001.58	4467.84	1180.4	2488.72	1203.28	3488.16	817.74	743.82	5658.73	6590.97	17026.9	7092.62	5983.46
97353.1	71559.2	217.8	6485.49	2738.32	808.08	2762.24	11332.9	1966.64	5630.24	993.3	3432.66	6880.9	25873.3	17051.4	9255.64
92955.6	84082.7	145.53	1598.85	4696.64	1326	1178.32	680.16	2596.88	604.45	621.39	5656.42	5347.51	4926.44	1950.51	2811.61
144386	59926.7	192.06	3413.52	2623.92	700.96	1229.28	5720	2977.52	3246.32	1540.77	5184.41	4590.69	8292.63	8740.56	5469.96
139002	51827.5	145.53	669.24	3389.36	970.32	687.44	354.64	2872.48	465.08	473.55	4275.04	5079.7	2056.37	859.52	1553.93
112053	52212.6	138.6	2082.96	2459.6	474.24	1231.36	5646.16	1537.12	2181.41	846.23	4054.82	3617.41	7036.53	5616.11	3469.68
122717	47204.2	141.57	6902.28	3875.04	854.88	3081.52	14187.7	2977.52	5431.58	587.51	6083	7008.88	26246.2	16661.9	9250.9
59330.9	91965.1	178.2	2551.23	3240.64	780	556.4	751.92	4800.64	2149.84	1305.92	6534.22	4134.86	1892.84	3986.34	4571.73
258622	208602	917.73	5697.45	3413.28	1583.92	2524.08	1280.24	4209.92	1399.09	3856.16	8992.06	14703.5	14182.9	6405.32	10749.5
150561	184816	647.46	8819.91	4507.36	1477.84	3560.96	5328.96	4910.88	3121.58	2912.91	7700	14457.8	32050.3	15863.2	14531.3
Single Cells
Patient 14: Sarcoidosis
244259	246651	1044.45	7323.03	3950.96	1595.36	2522	11345.4	4788.16	6510.35	4860.24	8573.18	15682.3	11501.6	11682.5	12756.1
138466	67444.7	62.37	1057.32	1263.6	298.48	530.4	2026.96	1061.84	674.52	167.09	2010.47	2175.66	4085.09	2552.49	1540.5
137738	48333.8	168.3	1277.1	2618.72	755.04	896.48	3351.92	1046.24	1528.45	353.43	2129.82	1833.59	5262.19	3418.33	1919.7
40921.2	71445.3	86.13	2962.08	3700.32	672.88	1358.24	7362.16	1764.88	2931.39	551.32	5757.29	2593.57	10078	7799.67	3970.54
85335.1	90066.2	157.41	3613.5	2843.36	695.76	1505.92	6195.28	2358.72	2008.93	485.87	3749.13	4954.88	12206.3	7566.62	4855.34
64987.1	89432.6	222.75	2232.45	1332.24	494	1106.56	818.48	1647.36	786.17	311.08	2253.79	6212.56	9729.64	4321.3	3951.58
79086	95878.5	99.99	908.82	3755.44	856.96	476.32	144.56	2178.8	562.87	612.92	5011.16	2755.52	1358.8	827.13	1279.8
123243	57812	203.94	2385.9	1887.6	509.6	1038.96	3700.32	2864.16	2216.83	564.41	4838.68	4123.01	8149.64	5767	3934.2
184768	91645.3	189.09	810.81	4351.36	939.12	561.6	234	2558.4	414.26	414.26	3761.45	2828.99	1320.09	711.79	1049.12
64024	60557.3	120.78	1909.71	1992.64	535.6	995.28	4961.84	1130.48	2123.66	349.58	2474.78	2613.32	6643.9	4800.04	2520.89
119151	59030.7	64.35	2570.04	2066.48	475.28	1450.8	5190.64	1866.8	2316.16	738.43	3556.63	3481.53	9335.43	5848.37	3917.61
100996	83947.1	85.14	669.24	2344.16	680.16	393.12	2903.68	1448.72	1541.54	859.32	4448.29	3273.76	1467.03	1710.35	1624.24
44435.8	137088	447.48	4685.67	1888.64	1295.84	956.8	1097.2	2097.68	2131.36	7442.82	3503.5	8523.31	4428.74	5336.45	8808.5
107895	51086	102.96	2049.3	1589.12	605.28	980.72	869.44	1263.6	528.99	203.28	2408.56	3160.79	8178.87	4025.84	3024.91
96729.4	91383.9	238.59	993.96	3701.36	803.92	514.8	2748.72	1548.56	1372.91	429.66	2581.04	2879.55	1305.87	2810.03	2396.86
77993.3	99704.9	141.57	918.72	2458.56	575.12	500.24	978.64	2435.68	838.53	352.66	2879.8	3533.67	3096.01	1523.91	1397.51
105615	58099.1	76.23	3039.3	1232.4	281.84	1526.72	6420.96	1290.64	1952.72	326.48	2336.18	2940.38	10785.1	6801.11	3479.16
81626.1	171187	641.52	4265.91	1714.96	730.08	1405.04	1590.16	3436.16	1585.43	1860.32	3404.94	11217.2	8307.64	4269.95	7546.08
102591	61130.5	86.13	2405.7	1672.32	374.4	840.32	5096	1752.4	2595.67	729.19	5651.8	3503.65	7798.88	5407.55	3257.17
162154	57064.6	142.56	1757.25	4000.88	858	794.56	1110.72	1120.08	363.44	597.52	3860.01	4023.47	5279.57	2738.14	2412.66
92726.4	68387.2	161.37	906.84	2751.84	678.08	558.48	2915.12	1731.6	1804.11	709.17	4258.1	2677.31	1256.1	3045.45	1695.34
85788.7	72969.9	131.67	1013.76	2992.08	742.56	93.6	292.24	1213.68	806.96	623.7	3954.72	1798.83	1016.73	1553.14	1768.81
81187.9	85198.4	142.56	800.91	3658.72	830.96	434.72	298.48	1348.88	496.65	331.1	4531.45	2948.28	1318.51	728.38	1478.09
119681	61677	183.15	2381.94	4176.64	776.88	1062.88	8681.92	2527.2	3453.45	935.55	4627.7	4017.94	5446.26	5684.05	3483.11
223295	228512	775.17	6511.23	3038.88	1202.24	2790.32	7318.48	3938.48	3138.52	3381.07	5400.01	12460.7	19038.2	10325.3	11784.4
236833	254349	767.25	5049	3019.12	1019.2	1759.68	4375.28	4344.08	2926.77	3341.8	5031.18	11820	9688.56	6899.07	9679.87
38865.4	140544	463.32	3767.94	2225.6	743.6	1118	647.92	2199.6	1275.89	2305.38	3057.67	7448.12	7433.11	3531.3	7522.38
55652.7	67969.4	106.92	3334.32	2598.96	670.8	1360.32	6111.04	2217.28	2849	599.83	5202.12	3687.72	11455	7155.03	4816.63
136701	71682.9	143.55	2794.77	2467.92	620.88	1009.84	5651.36	2472.08	2582.58	831.6	4998.07	4584.37	8473.54	6699.2	4074.03
117057	63243.2	75.24	944.46	2034.24	566.8	662.48	4838.08	1492.4	2035.11	492.8	3143.14	2279.15	2482.97	3188.44	1489.15
79366.2	86832.9	113.85	1813.68	2889.12	776.88	968.24	3924.96	1131.52	1780.24	371.91	2120.58	3706.68	5451	3717.74	2701.01
91521.9	63118.4	145.53	1467.18	2046.72	439.92	575.12	3401.84	2136.16	1848	903.21	3473.47	3510.76	1537.34	3817.28	2520.89
109833	192889	724.68	5677.65	4208.88	1404	1866.8	6595.68	5048.16	3356.43	3685.22	4798.64	14506	8887.5	6495.38	11445.5
59910	68623.8	171.27	773.19	2303.6	636.48	552.24	3260.4	1989.52	1395.24	419.65	2750.44	2855.85	1707.19	2560.39	1290.86
99028.2	91307.7	154.44	5366.79	3194.88	796.64	2257.84	6809.92	2185.04	2759.68	1131.9	5671.82	5876.02	20152.9	10574.9	7571.36
165612	88150.6	210.87	4333.23	3696.16	893.36	1849.12	754	1986.4	376.53	528.22	2414.72	5669.83	19139.3	8629.96	5838.89
106708	87718.9	46.53	1393.92	1316.64	379.6	762.32	565.76	1727.44	636.02	250.25	2378.53	1918.12	4773.97	2097.45	2072.96
118275	60922.6	132.66	650.43	2284.88	517.92	377.52	1111.76	1285.44	674.52	452.76	2775.08	1506.53	818.44	971.7	847.67
82270.1	108173	196.02	3181.86	1606.8	465.92	1483.04	10289.8	2163.2	4217.29	889.35	5892.04	4477.72	8607.05	7623.5	4345
74405	81029.5	249.48	6184.53	2652	735.28	2499.12	6950.32	2433.6	3175.48	967.12	2981.44	10130.2	22226.7	12418.8	8242.86
69467.2	58963.4	101.97	3548.16	3367.52	741.52	1472.64	4101.76	1544.4	2334.64	549.01	5949.79	3428.6	15853.7	8720.02	4886.94
163767	224968	1348.38	5881.59	3019.12	1332.24	1886.56	1356.16	4256.72	2139.83	4877.18	4429.81	15268.3	8802.18	4190.95	12572.9
86487.8	72603.6	173.25	3344.22	3429.92	694.72	1300	5018	1742	2513.28	1121.89	8677.9	3444.4	11725.2	7213.49	4352.9
40628.8	56807.2	144.54	953.37	3349.84	801.84	279.76	2374.32	1785.68	1483.79	394.24	2538.69	1670.06	817.65	2186.72	1760.91
206387	146646	269.28	6050.88	4249.44	1031.68	2428.4	5515.12	2902.64	1987.37	647.57	4074.84	9300.67	21488	10954.9	7982.95
29928.7	68664.4	174.24	712.8	1326	291.2	292.24	78	1982.24	258.72	269.5	2387.77	2644.13	1358.01	343.65	1346.16
100356	76380.5	58.41	1030.59	2973.36	645.84	608.4	6301.36	1233.44	2566.41	375.76	3033.8	2183.56	3210.56	4091.41	1732.47
100300	98101.1	223.74	6693.39	3898.96	830.96	2747.68	1136.72	2758.08	1027.95	880.11	7562.94	8102.24	26455.5	11457.4	9655.38
130441	70955.3	65.34	816.75	3779.36	849.68	592.8	200.72	1987.44	231.77	553.63	3317.16	2647.29	1309.03	825.55	1525.49
137284	67243.8	72.27	1993.86	1954.16	563.68	1153.36	7006.48	1567.28	2618.77	598.29	5325.32	2657.56	7587.16	6052.19	2640.18
102775	75866.7	151.47	247.5	2500.16	735.28	234	281.84	2126.8	472.78	312.62	2746.59	2041.36	872.16	543.52	545.1
84871	68974.3	136.62	2099.79	1428.96	469.04	840.32	2631.2	1736.8	1329.79	806.96	3694.46	4279.43	5431.25	3517.87	3545.52
51305.4	55116.3	34.65	3157.11	1125.28	325.52	851.76	4985.76	1432.08	2262.26	893.2	2675.75	3006.74	9064.46	6637.58	3848.88
78370.7	77008.1	209.88	2052.27	2744.56	678.08	853.84	1228.24	1063.92	800.8	509.74	2510.97	3771.46	9369.4	4175.15	3765.93
97996.2	74263.9	106.92	1993.86	2240.16	598	895.44	4942.08	2826.72	2310	602.91	3936.24	3201.08	5555.28	5373.58	3339.33
55698	54546	124.74	1567.17	2449.2	511.68	453.44	5520.32	1889.68	2268.42	835.45	5152.07	3577.91	2286.26	4272.32	2659.14
107781	67851.6	147.51	1192.95	2648.88	707.2	387.92	386.88	2286.96	616	672.21	5048.12	3957.9	1775.92	985.92	1913.38
195672	54577.7	239.58	3284.82	2233.92	741.52	1260.48	950.56	1781.52	1205.05	364.98	4383.61	4921.7	13519.3	5734.61	4336.31
56670	76655.7	106.92	1726.56	3736.72	776.88	899.6	6123.52	2622.88	2884.42	963.27	5863.55	4826.11	5230.59	4635.72	2644.13
114435	67721.9	133.65	2182.95	1969.76	398.32	945.36	4282.72	981.76	2181.41	573.65	3305.61	3388.31	6613.09	4999.91	2822.67
97625.2	77764.5	90.09	2031.48	2163.2	510.64	782.08	388.96	2195.44	234.08	472.78	2673.44	3236.63	6420.33	2612.53	3152.89
120565	62310.6	35.64	3632.31	2246.4	470.08	1402.96	5360.16	1355.12	2556.4	702.24	3421.11	3957.11	8292.63	7102.1	4447.7
97115.8	74186.6	127.71	738.54	1338.48	422.24	666.64	5487.04	2331.68	2591.05	600.6	4770.92	2408.71	1102.05	2620.43	776.57
108518	96303.2	48.51	760.32	1303.12	456.56	408.72	209.04	2089.36	515.9	511.28	2515.59	4075.61	1910.22	743.39	1291.65
208645	221777	868.23	5626.17	2848.56	1045.2	1809.6	4253.6	4768.4	3361.05	4737.81	11780.2	11738.6	9615.09	5900.51	11187.2
187150	186248	280.17	3703.59	5190.64	1497.6	1658.8	823.68	3252.08	685.3	907.83	3545.85	9838.66	11647.8	4866.4	6191.23
80144.6	95582.5	194.04	1020.69	1562.08	450.32	534.56	3787.68	1387.36	1540	435.82	1938.86	2844	2114.83	2712.86	1828.85
194087	235459	802.89	5163.84	4381.52	1475.76	1816.88	2321.28	4843.28	1817.97	2673.44	7515.97	14785.6	11488.2	6433.76	10450.9
64544	57782.3	83.16	551.43	2530.32	620.88	223.6	94.64	2359.76	229.46	428.12	2831.29	2850.32	1166.04	552.21	1150.24
126595	58997.1	78.21	3142.26	1612	418.08	1581.84	6621.68	1502.8	2957.57	301.84	3002.23	2982.25	11524.5	7609.28	3804.64
103926	65755.8	179.19	2593.8	2223.52	485.68	1229.28	4892.16	1710.8	2377.76	866.25	3761.45	3818.07	7882.62	5751.2	3476
25091.4	84470.8	178.2	3396.69	3240.64	816.4	1556.88	10102.6	3023.28	4472.16	965.58	7563.71	6028.49	10936	9942.15	4756.59
240576	242947	989.01	5254.92	2540.72	1124.24	1694.16	12727.5	4518.8	5148.99	4009.39	6047.58	14473.6	7503.42	8031.93	10733.7
148444	152436	377.19	8595.18	6224.4	1502.8	3623.36	17657.1	4759.04	8597.82	1623.16	11518.4	11403.6	28486.6	19551.7	11841.3
259420	241087	835.56	6555.78	2711.28	1177.28	2118.48	2182.96	3852.16	1660.89	3618.23	4693.15	14577.9	16880.7	7704.87	11761.5
110426	75733	52.47	2574	2848.56	661.44	1467.44	3696.16	1441.44	1496.11	301.84	2808.19	3223.2	9649.06	5526.84	3957.11
131221	50974.1	155.43	3529.35	3140.8	790.4	1858.48	7562.88	1962.48	3267.11	607.53	4380.53	4786.61	13486.9	9198.76	5148.43
125764	233196	876.15	6150.87	2122.64	1009.84	2010.32	3750.24	4410.64	2607.22	3841.53	4633.09	17915.6	13276.7	6945.68	12199.2
129133	70209.8	127.71	3284.82	2579.2	639.6	1769.04	6562.4	2539.68	2866.71	580.58	6084.54	4618.34	11879.2	7438.64	4511.69
140652	43815.4	185.13	2888.82	2655.12	538.72	1251.12	5100.16	2206.88	2165.24	560.56	5567.1	4785.03	9441.29	5872.86	3778.57
127214	67984.3	189.09	4853.97	2992.08	743.6	2400.32	6067.36	2202.72	2336.95	1011.01	3846.92	4398.72	18960	10154.7	6504.07
100358	67640.8	122.76	1834.47	1144	377.52	788.32	3949.92	2838.16	1527.68	200.2	2945.25	3829.13	5581.35	3995.03	2403.18
158775	79869.2	179.19	3151.17	1775.28	450.32	1341.6	4704.96	2529.28	2102.1	457.38	4402.09	4963.57	11586.1	6288.4	4707.61
97680.3	82084.9	144.54	3755.07	3450.72	811.2	1895.92	9217.52	3094	3535.84	703.01	8192.8	4251.78	14009.1	9625.36	5315.91
98082.1	57910.1	120.78	2823.48	2017.6	499.2	1276.08	5751.2	1203.28	2226.84	338.03	2639.56	3005.95	10619.2	6618.62	3909.71
94887.4	211689	843.48	5432.13	1540.24	833.04	1542.32	841.36	3445.52	1511.51	3335.64	4063.29	14089.6	8705.01	3662.44	11000
36428.1	71304.8	157.41	2810.61	2215.2	716.56	881.92	383.76	1453.92	408.1	603.68	2130.59	3332.22	6158.05	3096.01	4387.66
167841	255475	793.98	6562.71	2924.48	1033.76	2245.36	6116.24	4883.84	2795.1	2952.95	6420.26	13813.1	15629.4	8509.88	11436
248859	223111	449.46	8378.37	6701.76	1853.28	3288.48	1550.64	4395.04	1747.9	1364.44	5530.91	14092	26036	12644.7	11038.7
207149	244909	932.58	6751.8	3934.32	1490.32	1968.72	1744.08	6996.08	2782.01	3635.17	9248.47	17973.3	9456.3	4395.56	12331.9
82939.9	57802.1	47.52	3062.07	2310.88	541.84	1234.48	1670.24	1830.4	1128.05	408.87	6394.85	3728.8	11784.4	5736.98	3982.39
96054.7	60352.4	138.6	4463.91	3510	786.24	1719.12	5167.76	2632.24	1958.88	480.48	8429.96	5076.54	17068.7	9386.78	5822.3
114263	112800	161.37	1745.37	1668.16	428.48	970.32	4666.48	2392	2621.08	677.6	4362.82	4526.7	5232.96	4475.35	2729.45
64270.3	80091	191.07	1310.76	3783.52	858	818.48	4675.84	2381.6	1926.54	729.96	4611.53	5174.5	2377.9	2806.87	2005.02
132240	64896.5	239.58	2307.69	1244.88	349.44	650	6015.36	2166.32	2825.13	647.57	3812.27	3284.03	4339.47	5198.2	3088.11
76622.8	83222.4	123.75	2443.32	2295.28	452.4	1131.52	5637.84	2947.36	2065.14	1142.68	4930.31	4687.07	7079.19	4822.95	3347.23
108767	63738.2	168.3	1415.7	2979.6	697.84	757.12	2628.08	1620.32	1368.29	622.93	3482.71	3340.12	3841.77	2923	2209.63
106823	72687.8	170.28	3386.79	4179.76	989.04	1595.36	8818.16	2683.2	3308.69	816.97	5514.74	5367.26	9472.1	7937.13	4134.86
121503	62864	174.24	2270.07	2135.12	612.56	994.24	3280.16	1901.12	1522.29	887.04	3225.53	3725.64	7319.35	4457.97	3144.2
132416	55928.1	203.94	3549.15	2619.76	538.72	1266.72	3381.04	1803.36	1638.56	367.29	3763.76	4691.02	13072.9	7632.98	4934.34
Single Cells
Patient 15: Sarcoidosis
233407	219825	1096.95	5275.66	3228.75	1287.3	1938.3	2416.05	1209.6	2860.92	3849.12	2950.02	3757.24	7612.06	4113.12	8332.02
117532	34548.3	202.91	493.37	2428.65	390.6	306.6	4910.85	1445.85	2173.23	724.95	3191.4	470.68	286.18	2412.44	530.54
106589	54937.1	293.55	320.33	2344.65	561.75	383.25	352.8	764.4	669.87	134.46	3681.45	268.96	227.96	123.82	481.34
130074	31960.9	167.89	808.55	1215.9	330.75	424.2	5005.35	2311.05	2493.18	460.89	4335.12	388.68	364.08	2708.46	888.06
143397	55147.2	217.33	1039.27	2829.75	578.55	418.95	1708.35	1815.45	1210.14	497.34	6556.14	751.12	1968	1581.78	965.96
113610	47607.6	201.88	3649.29	3361.05	589.05	1318.8	5506.2	2318.4	3102.3	1523.61	8433.72	1771.2	9548.08	7822.8	4559.2
141254	57995.2	219.39	570.62	2416.05	537.6	294	87.15	851.55	947.7	544.32	4006.26	338.66	393.6	1093.06	1056.16
148053	38699.2	262.65	2367.97	1954.05	329.7	1090.95	4465.65	1662.15	1648.35	1115.37	3980.34	1775.3	8397.62	5551.4	2933.14
144096	61263.4	340.93	1574.87	4065.6	854.7	888.3	731.85	1730.4	858.6	561.33	6426.54	1296.42	5911.38	3084.84	2026.22
152058	27165.2	311.06	1842.67	3592.05	847.35	1204.35	2752.05	1987.65	1196.37	647.19	4563.54	1568.66	7379.18	4236.94	2465.74
93402.1	25057.8	125.66	1851.94	2305.8	445.2	796.95	3211.95	853.65	1778.76	482.76	4359.42	1369.4	7079.88	4336.16	2509.2
168957	28908	209.09	1089.74	1821.75	304.5	697.2	5153.4	1320.9	2619.54	529.74	3282.12	497.74	1334.96	2881.48	943
111170	35083.9	169.95	1062.96	1451.1	392.7	435.75	1141.35	1457.4	925.02	503.01	2367.63	426.4	115.62	1116.02	1007.78
173088	47214.2	209.09	922.88	2693.25	596.4	229.95	450.45	2417.1	507.06	584.82	4639.68	405.08	346.86	558.42	946.28
146173	31559.2	233.81	1779.84	2644.95	568.05	679.35	3887.1	1506.75	2396.79	793.8	5950.26	1365.3	5738.36	4263.18	2184.48
127818	46302.6	282.22	2256.73	2220.75	542.85	1324.05	6313.65	2563.05	2293.11	669.06	4948.29	1638.36	8113.08	5962.22	3000.38
102806	66952.1	211.15	2570.88	5854.8	1122.45	450.45	2083.2	1964.55	2540.16	1647.54	7153.11	660.92	631.4	3763.8	3167.66
123930	42311.4	195.7	1706.71	1401.75	348.6	729.75	4167.45	1190.7	3572.1	2555.55	4065.39	1149.64	4488.68	3924.52	2164.8
217899	144326	235.87	679.8	3395.7	555.45	294	193.2	1623.3	596.97	174.96	2379.78	296.02	153.34	148.42	600.24
188184	35938.8	238.96	813.7	4049.85	809.55	479.85	2576.7	837.9	1522.8	592.11	2735.37	518.24	745.38	2082.8	1215.24
84389.8	38644.6	198.79	1753.06	1807.05	471.45	301.35	357	1134	639.09	657.72	2743.47	491.18	250.1	1316.92	1703.14
126713	30731.1	131.84	3461.83	1813.35	332.85	1443.75	4023.6	1424.85	2079.27	620.46	4876.2	2443.6	13097.9	7411.16	4602.66
191873	32171	287.37	1221.58	3101.7	512.4	427.35	5055.75	716.1	2176.47	755.73	2896.56	286.18	285.36	2562.5	923.32
178564	68764.9	380.07	819.88	2551.5	593.25	435.75	414.75	1696.8	488.43	558.9	3494.34	757.68	1082.4	595.32	1044.68
159524	59085.9	241.02	1964.21	3463.95	794.85	816.9	381.15	1665.3	916.11	557.28	6156.81	1375.14	5246.36	2797.84	2494.44
112374	27154.9	158.62	960.99	1341.9	374.85	504	3246.6	794.85	1978.83	605.88	2435.67	616.64	1901.58	2514.94	861
138675	42618.3	224.54	1675.81	2113.65	450.45	943.95	4546.5	1295.7	2003.94	990.63	3567.24	1196.38	5327.54	4053.26	1966.36
177577	34184.7	183.34	3083.82	2861.25	479.85	1180.2	3343.2	1113	1270.89	354.78	3968.19	2054.92	11422.6	6116.38	3635.06
171122	61683.6	338.87	3916.06	4799.55	1012.2	1668.45	711.9	1107.75	764.64	468.18	5233.41	2890.5	14597.6	6671.52	4671.54
120061	39559.2	257.5	1290.59	2727.9	585.9	325.5	1900.5	1098.3	1621.62	494.1	3479.76	376.38	299.3	3046.3	1857.3
31674.7	34068.3	196.73	1286.47	2521.05	704.55	770.7	5256.3	1635.9	2011.23	598.59	4879.44	1116.02	4148.38	3822.02	1785.14
113818	25572.8	280.16	992.92	1585.5	379.05	756	5547.15	1373.4	2212.11	498.96	3368.79	815.9	2409.16	3248.84	1117.66
119897	65782	286.34	1309.13	3665.55	807.45	396.9	206.85	2042.25	931.5	868.32	4646.16	549.4	298.48	492	1348.9
116275	55022.6	329.6	1433.76	3369.45	814.8	757.05	7709.1	2250.15	3249.72	873.99	4858.38	575.64	500.2	3881.88	1271.82
169887	34227.9	310.03	246.17	3189.9	690.9	376.95	177.45	1115.1	786.51	622.08	6754.59	496.92	268.14	273.06	638.78
234463	69079	335.78	2044.55	4567.5	893.55	1040.55	4216.8	1962.45	1846.8	574.29	4662.36	1462.88	6631.34	4414.88	2660.9
68745.6	102985	634.48	3781.13	1971.9	678.3	789.6	728.7	564.9	2170.8	10631.2	4221.72	2402.6	1837.62	2587.1	8154.08
117209	31424.3	266.77	1393.59	2856	494.55	813.75	2228.1	917.7	1666.17	1559.25	5815.8	1079.94	4018	2938.88	2142.66
172160	39396.5	298.7	358.44	4027.8	854.7	441	740.25	1253.7	707.94	234.9	4553.82	365.72	300.94	441.98	408.36
92543.6	58764.6	179.22	531.48	2566.2	577.5	367.5	1338.75	1782.9	848.07	396.9	5192.1	337.84	423.94	907.74	476.42
103589	36931.7	250.29	1823.1	2920.05	626.85	810.6	2461.2	1416.45	1740.69	947.7	9036.36	1271.82	5794.94	3808.08	2041.8
201492	54570.4	278.1	315.18	1439.55	316.05	362.25	137.55	1077.3	549.99	431.73	3218.94	436.24	323.9	428.86	442.8
74408.9	45608.4	281.19	1862.24	1633.8	492.45	841.05	10568.2	1866.9	4101.03	1344.6	4779	917.58	2733.06	5771.98	1916.34
117730	44317.8	266.77	187.46	3706.5	957.6	417.9	284.55	1076.25	513.54	468.99	5159.7	328	367.36	182.04	357.52
257883	180652	1164.93	6704.27	2953.65	1031.1	2295.3	5010.6	2212.35	4047.57	6550.47	9474.57	5046.28	14842.8	9017.54	10760.9
128545	51931.6	147.29	2519.38	3011.4	439.95	872.55	4950.75	1896.3	1995.84	668.25	5315.22	1762.18	8172.94	5776.08	2884.76
89735.5	33103.2	112.27	2215.53	1923.6	367.5	683.55	3033.45	966	1197.18	611.55	3717.09	1630.16	8222.14	5047.1	2592.02
137592	42794.4	144.2	1081.5	2009.7	439.95	589.05	4669.35	1690.5	2693.25	655.29	5859.54	902	3444	3539.12	1506.34
160454	35767.8	163.77	405.82	4109.7	688.8	284.55	862.05	2110.5	1063.53	865.08	5503.14	267.32	188.6	546.94	549.4
234914	124996	186.43	713.79	1745.1	455.7	405.3	3563.7	1489.95	1420.74	745.2	4141.53	416.56	301.76	1840.08	970.06
123537	39423.2	234.84	1037.21	1669.5	370.65	678.3	3572.1	1274.7	1588.41	473.85	4206.33	1066	3978.64	3429.24	1583.42
139493	56634.5	353.29	697.31	2573.55	565.95	385.35	417.9	1172.85	841.59	555.66	5268.24	574	2244.34	1043.86	779
121243	41250.5	414.06	1426.55	2945.25	620.55	1041.6	5466.3	1328.25	1765.8	872.37	5502.33	959.4	2538.72	2967.58	1588.34
73383.2	79462.4	410.97	3558.65	2068.5	631.05	490.35	438.9	1174.95	1492.83	16937.9	6904.44	1094.7	1162.76	2832.28	7151.22
72821.3	31420.1	194.67	1396.68	1912.05	511.35	698.25	3951.15	907.2	1763.37	655.29	5325.75	989.74	4702.7	3682.62	1856.48
130533	36581.5	173.04	2140.34	2977.8	525	829.5	2076.9	1124.55	1103.22	736.29	3043.17	1415.32	6879.8	4129.52	2855.24
101514	34214.5	166.86	1845.76	2270.1	423.15	778.05	3017.7	1417.5	1718.82	875.61	5045.49	1150.46	5251.28	3841.7	2179.56
109509	35365.1	275.01	1754.09	3046.05	554.4	843.15	3843	723.45	2005.56	913.68	4485.78	1324.3	6036.84	4239.4	2292.72
127555	46388.1	247.2	1836.49	2840.25	525	988.05	7669.2	1852.2	3666.87	932.31	8396.46	1152.1	4998.72	5676.04	2112.32
122543	43053	256.47	1110.34	1513.05	488.25	596.4	5380.2	1628.55	3455.46	941.22	3572.91	571.54	528.08	3850.72	1592.44
138030	42781	306.94	1791.17	1707.3	448.35	863.1	3424.05	1478.4	1834.65	675.54	2938.68	1181.62	4613.32	3738.38	2576.44
109037	48599.5	255.44	941.42	1598.1	350.7	689.85	3801	1296.75	2165.13	806.76	4829.22	700.28	2520.68	2877.38	1390.72
219902	67489.7	439.81	646.84	2921.1	748.65	355.95	238.35	1019.55	773.55	724.14	6607.98	789.66	627.3	348.5	1467.8
130613	28458.9	199.82	1100.04	1657.95	413.7	443.1	1659	709.8	758.16	370.98	2182.14	587.12	2417.36	1655.58	1341.52
125247	28264.2	99.91	2788.21	3279.15	783.3	1147.65	3174.15	1257.9	1780.38	549.99	6420.06	1798.26	9976.12	5535.82	3535.84
105669	29217	96.82	1713.92	1696.8	414.75	772.8	4088.7	703.5	1688.85	472.23	2431.62	1245.58	6810.1	4570.68	2241.88
94012.8	39401.6	132.87	1698.47	2548.35	696.15	761.25	5891.55	1208.55	2869.83	789.75	6038.55	1198.84	5681.78	4726.48	1973.74
122610	60415.7	346.08	3276.43	2809.8	630	1555.05	9598.05	2128.35	3795.66	665.82	5601.96	2361.6	11975.3	8780.56	4311.56
124825	41952.9	151.41	2026.01	2633.4	448.35	1000.65	5559.75	1582.35	2916.81	630.99	4829.22	1427.62	6803.54	5174.2	2678.94
159401	37867.9	267.8	1541.91	2276.4	582.75	1128.75	4613.7	1673.7	2059.83	742.77	3951.18	1241.48	5057.76	4473.92	2081.16
130176	46233.6	305.91	2385.48	2711.1	584.85	960.75	3828.3	1228.5	1747.98	533.79	6228.9	1784.32	8651.82	5778.54	3055.32
85544.8	31509.8	303.85	1237.03	2054.85	480.9	496.65	1734.6	1468.95	835.11	312.66	4414.5	1020.08	3927.8	2591.2	1480.92
130910	50344.3	271.92	925.97	1746.15	573.3	804.3	7251.3	1494.15	3011.58	852.93	6887.43	753.58	1719.54	3895	942.18
123062	33802.5	317.24	1563.54	2558.85	583.8	946.05	4815.3	816.9	1685.61	699.03	3508.11	1284.12	4943.78	4134.44	1840.08
56656.3	38050.3	349.17	2130.04	3403.05	686.7	807.45	7624.05	1709.4	3677.4	1327.59	4022.46	1389.9	4183.64	5864.64	2962.66
102372	50226.9	140.08	1818.98	1749.3	301.35	900.9	8418.9	2656.5	3346.92	1392.39	5677.29	1098.8	4541.16	5800.68	2444.42
178799	39212.1	267.8	2519.38	1992.9	605.85	1100.4	5158.65	1431.15	2161.89	1023.84	3760.02	1596.54	8911.76	5674.4	3393.98
117627	58958.2	242.05	2584.27	2607.15	579.6	980.7	1830.15	1755.6	977.67	441.45	3407.67	1761.36	8659.2	4621.52	3057.78
114728	58286.7	290.46	1746.88	4402.65	985.95	836.85	6995.1	2004.45	2818.8	730.62	4177.17	997.12	3396.44	4787.16	2330.44
131619	42008.6	144.2	1655.21	2007.6	508.2	928.2	6659.1	1981.35	2899.8	917.73	8508.24	1087.32	5363.62	5318.52	2131.18
152489	30061.6	247.2	1259.69	1549.8	285.6	699.3	4611.6	889.35	2207.25	827.01	2806.65	1002.04	4214.8	3812.18	1417.78
115230	35379.5	159.65	2462.73	3011.4	615.3	995.4	5045.25	1005.9	2212.11	833.49	3948.75	1581.78	7683.4	5726.06	2683.04
192367	52062.4	263.68	543.84	3320.1	714	301.35	286.65	1072.05	848.07	223.56	4171.5	493.64	214.02	432.96	660.1
135119	41929.2	197.76	2083.69	2933.7	563.85	1075.2	4392.15	1433.25	2117.34	1074.87	8414.28	1754.8	8784.66	5734.26	3166.84
163239	49742.8	229.69	2150.64	3857.7	773.85	932.4	6062.7	1849.05	2201.58	665.82	4722.3	1731.84	7548.92	5839.22	2475.58
121058	42825.3	267.8	2017.77	2381.4	418.95	748.65	3624.6	1859.55	2055.78	936.36	6145.47	1476	7222.56	4591.18	2508.38
159957	61151.1	327.54	309	3081.75	737.1	315	443.1	855.75	372.6	367.74	4003.83	570.72	383.76	188.6	551.86
71862	34095.1	249.26	1556.33	1203.3	239.4	568.05	3567.9	636.3	1451.52	803.52	4060.53	1133.24	4673.18	3608.82	2312.4
184940	63317.2	312.09	1507.92	2630.25	658.35	654.15	1249.5	1258.95	942.84	522.45	3359.88	1120.12	3983.56	2214	1822.86
125177	39626.2	187.46	1222.61	2071.65	540.75	680.4	4007.85	958.65	1775.52	736.29	6439.5	1099.62	4439.48	3787.58	1835.16
79291.8	33963.2	180.25	694.22	1957.2	368.55	205.8	2455.95	1510.95	1519.56	694.17	2907.09	151.7	205.82	2268.94	1109.46
115188	46330.4	242.05	2088.84	2585.1	740.25	1086.75	1462.65	1226.4	590.49	302.13	2530.44	1639.18	7544	3922.88	2707.64
107571	45064.6	266.77	3710.06	1367.1	456.75	1797.6	4533.9	1837.5	1887.3	660.96	3255.39	2498.54	13120	7453.8	4979.86
87101.3	45267.5	265.74	1401.83	1888.95	521.85	844.2	4984.35	1453.2	2205.63	607.5	3348.54	1104.54	4938.86	4276.3	2023.76
107543	55270.8	418.18	594.31	3027.15	634.2	526.05	424.2	431.55	523.26	298.89	2552.31	747.02	1095.52	530.54	1094.7
95452.6	47369.7	182.31	2601.78	2686.95	521.85	957.6	9963.45	3173.1	3969	1772.28	6906.06	945.46	3633.42	7320.96	3152.08
109045	28714.3	148.32	1345.18	2315.25	358.05	682.5	4189.5	1191.75	1777.95	590.49	5519.34	1127.5	4952.8	4063.1	1875.34
201664	47671.5	275.01	5064.51	2263.8	394.8	2114.7	3987.9	1864.8	1759.32	1041.66	3756.78	3595.7	20520.5	10567.3	6701.04
134639	23727.1	166.86	610.79	2349.9	555.45	374.85	3165.75	1121.4	1674.27	903.15	3511.35	272.24	311.6	1580.14	701.1
100037	24872.4	182.31	1788.08	2862.3	517.65	930.3	4626.3	693	1598.13	691.74	4218.48	1306.26	6965.9	4924.92	2234.5
Single Cells
Patient 16: Behcets Disease
84124.2	53663.9	176.22	5118.3	3711.83	698.71	1677.76	3793.15	1794.39	2198.35	1262.8	6748.28	3715.2	19240	9883.2	6252
141011	60292	252.45	3500.64	3677.59	651.63	1316.1	7037.39	2326.18	2644.95	945.56	4659.27	2102.4	9409.6	7380	4316.8
64772.5	37492.3	129.69	3094.74	1879.99	385.2	1035.76	3472.15	1376.02	1775.62	794.64	5377.68	2701.6	12160	6233.6	4000
101766	60651.4	168.3	654.39	4080.98	763.98	430.14	454.75	1437.01	674.52	565.18	3998.61	951.2	1098.4	660.8	1664
124404	42665	175.23	4455	4977.64	1020.78	1986.99	4736.89	1365.32	1486.1	1098.79	6658.19	3145.6	16890.4	8921.6	6069.6
63525.9	42475.9	180.18	3354.12	3407.95	682.66	1209.1	4137.69	1621.05	1387.54	926.31	7524.44	2885.6	12938.4	6976.8	4340.8
117299	43377.8	211.86	3625.38	2127.16	373.43	1449.85	3862.7	1198.4	1473.01	509.74	3678.29	2750.4	14397.6	7768	4580
49212.4	51927.5	192.06	4641.12	3580.22	679.45	1917.44	4307.82	1751.59	1536.92	1409.87	5657.96	3300.8	16890.4	8616.8	5934.4
106269	23291.7	218.79	3092.76	2464.21	522.16	923.41	3360.87	948.02	1653.19	753.83	5066.6	2561.6	12980.8	7511.2	5260
139568	52076	229.68	3100.68	4155.88	801.43	1254.04	4781.83	1734.47	1714.79	879.34	5095.09	2274.4	9952.8	5922.4	3228
219794	104910	518.76	4177.8	3153.29	1048.6	1484.09	4000.73	2364.7	2212.21	7047.81	11069.5	2648	5355.2	4226.4	6718.4
123333	80556.3	274.23	4035.24	4575.32	1042.18	448.33	724.39	2275.89	1667.82	1560.79	3234	1188	575.2	3436.8	4421.6
131024	56285.5	271.26	793.98	4260.74	797.15	445.12	1476.6	1623.19	962.5	120.12	4588.43	496.8	1536	1538.4	1013.6
92814.7	49211.9	221.76	2363.13	3507.46	762.91	751.14	3524.58	1993.41	1616.23	1936.55	4375.91	1424	5584	4048	2841.6
53852.9	54481.7	162.36	3434.31	2794.84	553.19	1139.55	4470.46	1484.09	1558.48	1349.81	4588.43	3494.4	12030.4	6843.2	4402.4
82807.9	39248.6	188.1	4072.86	3351.24	701.92	1489.44	4360.25	1297.91	1917.3	1372.14	6297.83	3251.2	16347.2	8740.8	5797.6
94657.4	38970.4	201.96	3892.68	3692.57	659.12	1445.57	5275.1	1404.91	2006.62	1369.06	7705.39	2657.6	13978.4	7994.4	4709.6
108342	57153.7	213.84	2741.31	3944.02	666.61	1231.57	4736.89	2030.86	2307.69	1479.94	7807.8	2238.4	9472	5868	3473.6
87552.1	36994.3	125.73	3029.4	2469.56	543.56	1244.41	2758.46	1798.67	1713.25	952.49	6012.16	2204.8	11397.6	6009.6	4211.2
94725.5	46620.1	230.67	1038.51	2410.71	416.23	324.21	1998.76	2033	1024.87	1161.93	4964.19	1794.4	892	1195.2	1708
70635.2	51270.1	286.11	4514.4	4113.08	787.52	1374.95	4623.47	1972.01	2208.36	758.45	6731.34	3270.4	15928	9348.8	5331.2
135236	54083.7	174.24	3745.17	4139.83	844.23	1440.22	5506.22	1179.14	2218.37	1004.85	6018.32	2772	14748.8	8729.6	4958.4
174931	72726.4	224.73	4124.34	5085.71	1013.29	1349.27	4599.93	2347.58	1801.8	1501.5	4366.67	2321.6	11242.4	6789.6	4574.4
114682	37269.5	146.52	3373.92	2238.44	601.34	940.53	3625.16	1661.71	1603.14	1406.02	7263.41	2804	13858.4	7384.8	4572.8
66743.2	57945.7	226.71	4884.66	3727.88	766.12	1993.41	7426.87	2337.95	2687.3	1195.81	7308.84	3401.6	16972.8	10101.6	5882.4
176616	123385	503.91	8944.65	4750.8	1087.12	1738.75	6886.52	2765.95	4954.95	2360.05	5278.35	4648.8	14388	14032	12121.6
156544	61823.5	253.44	4958.91	4017.85	841.02	1531.17	6585.85	2639.69	2168.32	1067.99	6049.89	3126.4	14237.6	8844	5702.4
114134	54837.1	238.59	4008.51	4240.41	925.55	1706.65	5817.59	1815.79	2601.83	1542.31	6960.8	2916	13764	8997.6	4987.2
92968.6	50646.4	225.72	3351.15	2869.74	761.84	1104.24	3681.87	1617.84	1961.19	1043.35	7351.96	2809.6	13159.2	7036.8	3993.6
106740	62116.6	270.27	363.33	3759.98	751.14	559.61	1572.9	1566.48	831.6	435.05	4814.81	716.8	499.2	980.8	645.6
129027	55876.6	243.54	4651.02	3990.03	874.19	1614.63	5910.68	1953.82	2162.16	839.3	2447.06	2802.4	15648	9125.6	5685.6
92312.5	51525.5	168.3	3810.51	3946.16	898.8	1426.31	3751.42	1308.61	1643.95	1521.52	6038.34	2951.2	14932	7820.8	5184.8
104790	63951	223.74	775.17	2862.25	691.22	624.88	347.75	1218.73	519.75	425.81	4499.11	1276.8	3482.4	1761.6	1556
23146.6	46234	121.77	1986.93	2096.13	479.36	911.64	3617.67	1817.93	1900.36	413.49	4339.72	1830.4	7396.8	4824	2930.4
153715	58897.1	239.58	4519.35	3832.74	904.15	1976.29	3590.92	1718.42	2131.36	1635.48	8297.52	3381.6	17953.6	9277.6	6554.4
74528.1	50906.8	204.93	3119.49	4161.23	797.15	1399.56	5211.97	2222.39	2479.4	1474.55	6970.04	2721.6	12273.6	7041.6	4220.8
102181	77792.2	241.56	5242.05	4806.44	1096.75	1402.77	7351.97	2641.83	2314.62	1432.2	4757.83	2644.8	9964	7158.4	5420
105578	44851	144.54	4348.08	3982.54	958.72	1537.59	4827.84	1561.13	2447.06	1642.41	6626.62	3350.4	16751.2	9411.2	5576.8
154768	55660.8	301.95	3341.25	5908.54	1288.28	600.27	3518.16	2348.65	2320.78	1586.2	4676.98	849.6	677.6	3798.4	3624
91560.8	42565.1	181.17	4041.18	3939.74	706.2	1739.82	3507.46	2340.09	2139.06	977.13	8533.14	2844	15340.8	7879.2	5593.6
220186	153564	488.07	6794.37	6030.52	1400.63	2743.48	5942.78	3251.73	1969.66	1363.67	8810.34	6548.8	23044	12524	10033.6
95578.4	40708.8	195.03	2855.16	3567.38	761.84	1063.58	4014.64	1700.23	1288.98	806.96	3783.78	2057.6	9204.8	5332	3554.4
84936.6	57663.5	222.75	6882.48	4149.46	851.72	977.98	2080.08	1901.39	2611.07	1487.64	5257.56	2319.2	10439.2	9430.4	7746.4
212495	103068	394.02	15921.2	3075.18	784.31	4039.25	6627.58	3972.91	2892.12	2856.7	8436.89	9697.6	53528.8	26444.8	18787.2
163346	70715.7	313.83	4413.42	3889.45	874.19	1885.34	6249.87	2744.55	3448.06	1509.97	11270.5	3268.8	16644	10048	6069.6
122362	65660.8	183.15	654.39	4847.1	880.61	385.2	330.63	2103.62	862.4	654.5	7770.07	888.8	1344.8	473.6	596.8
73585.3	43177.9	199.98	4561.92	3198.23	624.88	1456.27	4214.73	1851.1	1849.54	2113.65	4812.5	3316.8	17311.2	9061.6	6460
80751.3	55847.9	183.15	4561.92	4507.91	1018.64	1718.42	7252.46	2510.22	2836.68	994.84	7678.44	3030.4	14776.8	9411.2	5640
78152	42296.8	191.07	3613.5	2810.89	527.51	1286.14	3921.55	1333.22	1619.31	1240.47	3065.37	2556	13645.6	7605.6	4076.8
124879	75943.9	173.25	2884.86	4685.53	908.43	824.97	2517.71	1506.56	1479.94	960.19	2317.7	1437.6	5016	4511.2	3439.2
118661	54459.9	305.91	7694.28	4345.27	796.08	1958.1	8515.06	3204.65	3780.7	1908.06	9394.77	4188.8	23836.8	14691.2	9440
66644.4	50003.9	156.42	3753.09	2764.88	527.51	1109.59	3878.75	1015.43	1828.75	934.78	3806.88	2908.8	11940	7036	5776.8
96956.2	78842.6	315.81	2785.86	3905.5	874.19	1262.6	4993.69	1719.49	1909.6	1268.96	7063.21	2492	9976.8	6570.4	3992
138736	48925.8	201.96	3897.63	2339.02	447.26	1189.84	5852.9	1485.16	1978.13	528.99	2200.66	2965.6	14019.2	8448	4871.2
87565	42869	164.34	3105.63	3679.73	746.86	1378.16	3008.84	1732.33	1481.48	1407.56	7123.27	2426.4	11594.4	6356.8	4398.4
95298.9	49613.9	167.31	3694.68	2861.18	559.61	1342.85	6859.77	1275.44	2457.84	639.87	3134.67	2395.2	11896	8691.2	4149.6
136131	61787.9	138.6	3257.1	3960.07	730.81	1332.15	5036.49	1639.24	1425.27	1008.7	3976.28	2428.8	12316	7276	4282.4
146565	52049.2	154.44	4238.19	3401.53	694.43	1275.44	4620.26	2324.04	1757.91	1063.37	5460.07	2647.2	11604	7166.4	5296.8
118564	62310.6	230.67	2059.2	3909.78	988.68	323.14	1708.79	1871.43	831.6	695.31	3202.43	790.4	581.6	1202.4	1763.2
88270.6	44150	157.41	2506.68	2749.9	594.92	971.56	2794.84	1270.09	1390.62	790.02	7787.01	1986.4	8255.2	4833.6	3009.6
95746.9	43630.3	128.7	4289.67	2774.51	416.23	1498	2917.89	1634.96	1145.76	1147.3	7117.88	2979.2	14944	8385.6	5033.6
136466	62297.7	289.08	2367.09	5029	1077.49	462.24	770.4	2535.9	713.02	974.05	3856.93	925.6	1532.8	1077.6	1778.4
78817	48619.9	200.97	4097.61	2902.91	649.49	1546.15	3681.87	2115.39	1145.76	566.72	3345.65	3105.6	15516.8	7925.6	5420
97336.9	54448	255.42	5661.81	4046.74	731.88	1812.58	3570.59	1636.03	1544.62	2047.43	7770.07	3895.2	20123.2	10124	7198.4
93488.6	60145.5	274.23	5488.56	4038.18	835.67	1806.16	3625.16	2036.21	2167.55	1388.31	5470.08	2920	14083.2	8956	6032.8
113079	42390.8	135.63	3063.06	3259.22	640.93	1378.16	4931.63	2142.14	1701.7	980.98	5278.35	2063.2	10415.2	6627.2	3496
82567.4	44428.2	147.51	5195.52	3840.23	841.02	1943.12	3589.85	1553.64	1965.04	1280.51	7864.78	3754.4	20527.2	10108	6180.8
86253.7	57210.1	230.67	4087.71	5275.1	913.78	1124.57	5505.15	2348.65	2784.32	1858.78	5379.99	1944.8	7128	6768.8	4358.4
108013	36468.6	182.16	3454.11	4028.55	782.17	1501.21	3925.83	1970.94	1479.17	1636.25	7776.23	2371.2	12625.6	7017.6	4517.6
90877.1	48985.2	232.65	4089.69	2630.06	612.04	1422.03	3927.97	1540.8	1709.4	1586.2	6136.9	2988	14951.2	8637.6	5130.4
81563	56459.7	271.26	2606.67	2545.53	506.11	831.39	2134.65	949.09	1134.98	927.85	4492.18	2152.8	9800.8	5553.6	4041.6
109984	63160	307.89	1391.94	4515.4	1092.47	693.36	346.68	1781.55	774.62	488.18	6874.56	1349.6	779.2	604.8	2450.4
73565.8	39823.7	156.42	2219.58	3047.36	607.76	905.22	3643.35	1371.74	1775.62	676.83	5690.3	1975.2	7531.2	4944.8	2813.6
84765.7	52118.6	158.4	4041.18	4061.72	760.77	1548.29	3217.49	1912.09	1479.94	1350.58	5308.38	2697.6	14476.8	8003.2	5112.8
89283.1	60595.9	200.97	2038.41	4733.68	895.59	402.32	1890.69	1877.85	1634.71	1058.75	3945.48	733.6	432	1452	1892
89165.6	42770	64.35	3403.62	2517.71	425.86	1186.63	4041.39	1264.74	1375.22	1079.54	6324.01	2343.2	12087.2	7598.4	4054.4
91166.3	42445.3	152.46	3772.89	3190.74	518.95	1133.13	4088.47	1939.91	1587.74	983.29	7002.38	3294.4	15494.4	8312.8	5324.8
104168	45913.2	190.08	6082.56	4134.48	896.66	2345.44	5195.92	1539.73	1860.32	1898.82	8138.13	4532.8	23429.6	12656	7835.2
86468.3	76022.1	193.05	2595.78	4165.51	819.62	1156.67	5737.34	1686.32	2179.1	657.58	4064.83	2239.2	8929.6	5963.2	3552.8
71851	52274	203.94	3560.04	3921.55	988.68	1211.24	5213.04	3789.94	3433.43	1633.94	9147.6	2274.4	6818.4	7888.8	5487.2
118885	52920.4	231.66	6026.13	2680.35	615.25	1596.44	3965.42	1729.12	2543.31	1081.85	5493.18	3725.6	18958.4	12640	7920
97648.7	55571.7	288.09	3223.44	3770.68	777.89	1119.22	4861.01	2834.43	2413.95	1201.97	7331.94	2340	10282.4	7540.8	4340
136781	58782.2	270.27	3653.1	3834.88	789.66	571.38	6181.39	3687.22	2559.48	1613.15	6006.77	840.8	852	3809.6	3393.6
177968	109818	440.55	4555.98	4098.1	1167.37	1736.61	5168.1	1673.48	2340.03	1118.81	6756.75	3752.8	15640	9013.6	6118.4
142039	56423.1	337.59	518.76	4597.79	1133.13	381.99	293.18	2057.61	560.56	436.59	5102.02	622.4	448.8	745.6	1054.4
66643.6	71967.1	234.63	4520.34	3630.51	743.65	1556.85	3628.37	1643.52	1613.15	718.41	4285.82	3435.2	16412.8	8318.4	5192
126823	61669.1	243.54	1682.01	4235.06	811.06	392.69	4268.23	2927.52	1649.34	1839.53	8417.64	1064.8	693.6	2198.4	1500.8
189749	88388.2	343.53	8484.3	7268.51	1418.82	2042.63	1887.48	2882.58	1985.06	1792.56	6999.3	4460	20461.6	11786.4	10361.6
175478	98822.8	279.18	5351.94	3431.49	879.54	2176.38	5917.1	1968.8	2638.79	1449.14	5533.22	4308.8	19068	10486.4	7663.2
212708	115894	360.36	4792.59	3730.02	967.28	1545.08	4801.09	2712.45	3290.98	1814.12	13523.5	3705.6	13962.4	8523.2	6308
153088	58668.4	162.36	2312.64	2374.33	465.45	1049.67	3171.48	1332.15	1767.92	656.81	4432.12	1921.6	8969.6	5653.6	3183.2
98149.3	38590.2	236.61	3909.51	3126.54	625.95	1428.45	3664.75	1669.2	1738.66	1399.09	5409.25	2669.6	14281.6	8225.6	4673.6
159948	65368.7	298.98	1799.82	4560.34	884.89	444.05	2669.65	3035.59	1164.24	638.33	7271.11	766.4	418.4	1344.8	1464.8
106214	73405.5	282.15	2963.07	3441.12	755.42	908.43	5130.65	2104.69	2384.69	1099.56	3814.58	1664.8	6690.4	6486.4	3894.4
127745	53527.3	211.86	1656.27	5111.39	946.95	612.04	5730.92	1590.02	2520.98	753.06	2615.69	850.4	771.2	4189.6	2173.6
82361.6	42150.2	217.8	3183.84	3822.04	715.83	1318.24	2990.65	1339.64	1647.8	1547.7	7020.86	2853.6	13548.8	7288.8	4731.2
208995	94588.6	340.56	3905.55	2684.63	892.38	1518.33	5988.79	2750.97	2445.52	1372.91	7861.7	3185.6	12292.8	8184	5124.8
123945	66117.1	342.54	4884.66	4323.87	872.05	1826.49	4568.9	2150.7	1673.21	1031.8	7763.14	3476.8	16266.4	9096.8	5766.4
74221.1	59645.5	250.47	4503.51	5082.5	1107.45	1881.06	4638.45	1881.06	2898.28	1239.7	8900.43	3676.8	17021.6	9261.6	5854.4
74054.2	44506.4	199.98	3321.45	3345.89	630.23	1234.78	3648.7	1797.6	1757.14	1329.02	5744.97	2734.4	12650.4	6585.6	4792.8
Single Cells
Patient 17: Behcets Disease
99164.8	54531.2	205.92	2563.11	2497.19	584.24	1039.86	3402.98	1448.61	1602.08	596.6	2591.6	2404	8701.6	5315.2	2936.8
172978	77040.8	170.28	1446.39	2331.51	568.98	949.39	2513.54	1183.74	691.6	400.52	2141.68	1343.2	5033.6	2868.8	1939.2
110574	81438.4	176.22	930.6	2699.93	650.73	444.72	4177.97	1243.69	1558	525.16	1690.24	1123.2	532.8	3348.8	1504
104117	68783.2	144.54	2248.29	1928.21	539.55	622.39	2102.61	904.7	898.32	428.64	1751.04	1259.2	3246.4	2607.2	2266.4
194084	73866.9	200.97	5164.83	2608.37	567.89	1993.61	3323.41	982.09	1505.56	429.4	1985.12	3172.8	17418.4	9998.4	6408.8
111283	84206.4	183.15	3259.08	2254.12	558.08	1292.74	5199.3	1315.63	1678.84	959.12	2600.72	2858.4	10550.4	6406.4	3749.6
102528	54228.2	153.45	1442.43	2360.94	451.26	649.64	2560.41	1043.13	1117.2	402.8	3879.04	1187.2	5065.6	3040.8	1882.4
107046	49187.2	127.71	2643.3	2076.45	728.12	1128.15	2416.53	830.58	873.24	281.96	1591.44	1723.2	9146.4	5044.8	2666.4
102682	93142.2	203.94	737.55	2539.7	625.66	500.31	3971.96	1875.89	1643.88	407.36	4056.88	1301.6	820	2132	897.6
120571	45039.1	191.07	715.77	1273.12	398.94	567.89	3348.48	692.15	1203.08	215.08	1216.76	2944	2867.2	2299.2	1124
99182.4	72743.2	174.24	1414.71	2407.81	731.39	452.35	2351.13	1215.35	965.96	584.44	3281.68	769.6	1204.8	1784	1632
100548	75608.3	152.46	772.2	2406.72	574.43	509.03	1371.22	1213.17	1065.52	338.96	3439.76	849.6	390.4	1560	1466.4
94737.6	55424.2	123.75	1516.68	1917.31	467.61	1075.83	4140.91	1386.48	1065.52	450.68	3290.04	1377.6	5464	3870.4	2092.8
109898	38116	101.97	706.86	1570.69	432.73	370.6	1178.29	910.15	522.12	63.08	2227.56	879.2	2036	1381.6	904
55235.2	112260	193.05	5885.55	2512.45	602.77	2157.11	5606.96	1054.03	1719.12	589	3250.52	3912	20644.8	10849.6	7008
233977	111233	227.7	3844.17	2547.33	807.69	1366.86	3995.94	2473.21	1315.56	937.08	4864	2452	7878.4	5014.4	4280.8
140485	86692.3	136.62	1668.15	3109.77	822.95	710.68	177.67	1410.46	713.64	346.56	2552.08	1372	2799.2	2305.6	2065.6
127312	100469	193.05	3199.68	2386.01	619.12	1310.18	4258.63	711.77	1472.12	506.16	2262.52	2490.4	9767.2	6465.6	4500
102280	57878.4	175.23	1879.02	1854.09	621.3	883.99	2605.1	1068.2	877.8	272.08	3110.68	2134.4	7307.2	4012	2244.8
165954	58328.8	243.54	483.12	2617.09	550.45	244.16	671.44	940.67	326.04	63.84	2441.12	525.6	324	568.8	529.6
152604	36142.9	131.67	2774.97	2588.75	719.4	1279.66	3381.18	892.71	1411.32	141.36	2501.16	1874.4	10364.8	5692.8	3169.6
171298	76765.6	189.09	2816.55	2432.88	639.83	1265.49	842.57	1013.7	263.72	389.12	1706.2	1824.8	8899.2	4309.6	3229.6
152361	75292.5	211.86	2540.34	2657.42	816.41	1161.94	2472.12	1230.61	968.24	172.52	2667.6	2180.8	8572.8	4533.6	3230.4
106632	36674.6	57.42	1377.09	1430.08	317.19	634.38	1940.2	535.19	544.92	171	1559.52	1097.6	5117.6	2664	1841.6
101032	59712.8	225.72	3092.76	2443.78	500.31	1391.93	4705.53	1500.93	1608.16	390.64	3317.4	2564	10952.8	6480	3801.6
108554	67888.3	158.4	2730.42	1921.67	425.1	795.7	2878.69	1531.45	1950.92	897.56	2900.16	1080.8	2630.4	4768	3820
153774	66069.6	214.83	2900.7	3145.74	912.33	1302.55	746.65	907.97	148.96	173.28	2137.12	1976	10956	4662.4	3893.6
132611	56204.3	162.36	2263.14	2408.9	434.91	1226.25	3771.4	1420.27	1150.64	313.88	3011.12	1998.4	9128.8	5627.2	3296
135906	73443.1	201.96	5014.35	2683.58	945.03	1799.59	3479.28	1210.99	1118.72	797.24	2653.92	3904.8	17662.4	9629.6	6355.2
192846	65361.8	204.93	721.71	2903.76	756.46	471.97	957.02	760.82	676.4	598.12	2153.08	375.2	322.4	1073.6	1239.2
101122	92922.4	105.93	3316.5	3009.49	612.58	1297.1	2593.11	889.44	595.84	385.32	2790.72	2512.8	12073.6	5985.6	4270.4
109821	51713.6	41.58	836.55	2285.73	528.65	656.18	2883.05	736.84	747.84	363.28	2935.12	1045.6	2873.6	2139.2	1236
138560	89315.8	316.8	4871.79	3225.31	779.35	1783.24	3627.52	740.11	964.44	323.76	1524.56	3690.4	17963.2	8675.2	6032.8
53199.2	63047.2	156.42	1054.35	2091.71	670.35	354.25	594.05	716.13	308.56	78.28	1846.8	1099.2	2431.2	1311.2	1624
80346.4	53004.6	78.21	1282.05	1858.45	491.59	631.11	156.96	906.88	275.12	158.08	1935.72	1320.8	4610.4	2184	1603.2
155026	78119.9	107.91	2900.7	2123.32	454.53	1225.16	2693.39	1685.14	1137.72	370.12	4114.64	2652	10172	5328.8	3548.8
130846	63009.5	190.08	4658.94	3200.24	767.36	1712.39	5642.93	1573.96	1556.48	785.08	3080.28	2520	12476	7321.6	4934.4
62784.8	68462.5	186.12	2075.04	2523.35	528.65	922.14	3515.25	1104.17	1200.04	406.6	2186.52	2082.4	7238.4	4200.8	2621.6
167966	62864	126.72	1524.6	2584.39	589.69	833.85	2184.36	909.06	864.12	155.8	2101.4	1612.8	6381.6	3864.8	1962.4
70216	69917.8	100.98	2222.55	1717.84	427.28	904.7	2655.24	979.91	898.32	467.4	2834.04	2354.4	7928.8	4540	2904
122207	98209	242.55	3770.91	3203.51	705.23	1862.81	5009.64	1607.75	1393.84	176.32	2051.24	2642.4	12102.4	7228.8	4209.6
80708.8	74661.8	210.87	3621.42	2319.52	576.61	1588.13	3731.07	900.34	1179.52	345.04	1307.96	2581.6	12679.2	6793.6	4332
205670	150389	353.43	2030.49	2527.71	909.06	756.46	2983.33	994.08	1369.52	758.48	1277.56	1764.8	2173.6	3325.6	2471.2
81081.6	99995.9	299.97	6331.05	2396.91	776.08	2717.37	1442.07	756.46	697.68	113.24	1912.92	4953.6	24840	10979.2	7600.8
149923	69495	160.38	1136.52	2213.79	571.16	469.79	3191.52	1390.84	1242.6	340.48	4658.8	1236	3023.2	2357.6	1227.2
128799	60897.9	215.82	1445.4	2253.03	608.22	516.66	3821.54	1733.1	1829.32	522.88	3125.12	836.8	1792	2963.2	1818.4
135214	63795.6	179.19	2141.37	2054.65	564.62	893.8	3153.37	1377.76	1060.2	463.6	3717.16	1864	5999.2	3808.8	2368.8
65176	64063.9	194.04	1564.2	2703.2	670.35	889.44	2019.77	1233.88	633.84	402.8	3691.32	1641.6	4724.8	2546.4	1917.6
154904	72151.2	232.65	1959.21	3260.19	839.3	530.83	4943.15	1119.43	2786.92	797.24	2299.76	612	457.6	4096	2501.6
151327	64008.4	152.46	3439.26	2556.05	632.2	1274.21	2695.57	813.14	762.28	230.28	2157.64	2427.2	12252.8	6140	4058.4
109314	82388.8	167.31	3133.35	2533.16	667.08	1600.12	3101.05	1475.86	935.56	601.92	4176.2	2884.8	11124	5793.6	3995.2
128221	61121.6	167.31	917.73	2661.78	812.05	156.96	210.37	1180.47	777.48	389.12	1616.52	731.2	300.8	1652	1633.6
103918	55267.7	18.81	1922.58	2206.16	471.97	777.17	2685.76	793.52	568.48	528.96	3595.56	1595.2	7067.2	4112.8	2601.6
101546	76193.4	172.26	1223.64	2511.36	578.79	718.31	2740.26	1037.68	876.28	198.36	2340.8	1432	4173.6	2683.2	1644.8
124350	61658.2	139.59	646.47	2530.98	565.71	273.59	695.42	1427.9	380.76	262.2	3405.56	948.8	560	632.8	853.6
139079	92079.9	205.92	1854.27	2639.98	612.58	1139.05	4345.83	1361.41	1594.48	478.8	4847.28	2418.4	6062.4	4030.4	2410.4
148960	71704.7	162.36	2303.73	2584.39	640.92	1207.72	4663.02	1006.07	1735.84	589.76	2615.16	2060	6852.8	5199.2	3067.2
82384.8	53245.2	154.44	1656.27	2067.73	481.78	951.57	2621.45	1141.23	987.24	315.4	3287	1581.6	7304.8	4187.2	2358.4
134571	73070.9	250.47	6362.73	2267.2	670.35	2699.93	1300.37	1288.38	318.44	227.24	2414.52	4718.4	25222.4	11473.6	8383.2
120692	61318.6	144.54	815.76	1776.7	473.06	586.42	3187.16	1273.12	1358.88	313.12	2789.96	1033.6	2641.6	2176	1284
141101	79003	162.36	1043.46	3019.3	809.87	439.27	3309.24	1417	1800.44	246.24	1596.76	688	1390.4	2866.4	1670.4
90524.8	53275.9	82.17	2064.15	1781.06	359.7	901.43	3346.3	1285.11	1083	591.28	4115.4	1928	7532	4558.4	2589.6
148210	44758.9	143.55	2525.49	1665.52	431.64	1285.11	3540.32	915.6	1092.12	223.44	1257.8	2144	10807.2	5950.4	3838.4
106103	63385.7	166.32	2980.89	3099.96	836.03	1113.98	3869.5	1432.26	922.64	149.72	2796.8	2171.2	10324	5836.8	3616
11716	24312.4	204.93	899.91	3345.21	925.41	660.54	632.2	1076.92	636.12	12820.4	4322.88	1415.2	786.4	612	2548
94998.4	58228.8	63.36	2485.89	2109.15	409.84	1107.44	2507	872	1019.16	614.08	2279.24	2220.8	9334.4	4773.6	3157.6
157269	77283.4	225.72	4260.96	3115.22	803.33	1456.24	3879.31	1931.48	1744.96	1037.4	3254.32	2783.2	11627.2	8001.6	5714.4
149258	78655.5	212.85	1985.94	2250.85	313.92	875.27	1819.21	719.4	592.8	194.56	1156.72	1599.2	6763.2	4458.4	2900.8
100316	54207.4	227.7	1616.67	2171.28	599.5	674.71	4497.34	1171.75	1449.32	414.96	1526.84	587.2	1366.4	3086.4	1819.2
161051	100757	254.43	4634.19	3030.2	887.26	2186.54	2212.7	969.01	522.12	299.44	1629.44	4184	19529.6	8628.8	6228
104589	65840.9	132.66	1335.51	2691.21	713.95	877.45	2975.7	1527.09	1326.96	230.28	2718.52	1122.4	4519.2	3616.8	1816
113775	50788	181.17	801.9	2013.23	498.13	600.59	3178.44	1084.55	1081.48	435.48	2229.84	1002.4	1903.2	1934.4	978.4
112038	80386	192.06	4443.12	2897.22	797.88	1911.86	1742.91	1141.23	563.16	389.12	2166	3433.6	17531.2	8497.6	5700.8
218330	119403	229.68	4793.58	4594.35	895.98	2279.19	5342.09	2193.08	1668.2	624.72	5047.92	4150.4	18070.4	10136.8	6004.8
126741	57920.9	216.81	1937.43	2443.78	701.96	950.48	2553.87	1152.13	1296.56	391.4	3268	1518.4	4581.6	3405.6	1983.2
133374	72582.8	157.41	2024.55	2747.89	632.2	1107.44	4603.07	1812.67	1767.76	699.2	4299.32	1804.8	5952	4666.4	2276.8
99254.4	68757.5	46.53	1753.29	2493.92	722.67	976.64	3040.01	1300.37	1154.44	492.48	4006.72	1523.2	6202.4	3904	2542.4
106645	55948.9	121.77	1808.73	2975.7	743.38	972.28	4522.41	1515.1	1667.44	611.8	3600.12	1808	6752.8	4448	2435.2
147882	69293.1	179.19	3663	2468.85	685.61	1742.91	3161	1324.35	985.72	390.64	3614.56	2644.8	14288	6929.6	4295.2
133159	49277.2	111.87	835.56	1983.8	473.06	445.81	2487.38	443.63	884.64	210.52	2005.64	384.8	1444.8	1816	1049.6
90332.8	53275.9	141.57	1138.5	1823.57	473.06	527.56	2693.39	878.54	899.84	388.36	2907.76	1468	3311.2	2480	1442.4
121898	81353.2	185.13	1924.56	2938.64	820.77	971.19	3363.74	1843.19	988.76	365.56	2204	1607.2	6362.4	3596.8	2052.8
79219.2	61465.1	130.68	3014.55	3690.74	909.06	1643.72	5991.73	1494.39	1513.92	570	5433.24	2388	10755.2	6346.4	3923.2
139623	35158.9	140.58	1387.98	1450.79	440.36	664.9	2605.1	833.85	668.8	305.52	1625.64	1535.2	4198.4	2503.2	1830.4
101766	54927.2	128.7	3033.36	2294.45	680.16	1423.54	5904.53	1507.47	1991.2	428.64	4250.68	1916.8	11194.4	6945.6	3699.2
113878	73500.6	188.1	3158.1	1953.28	505.76	1464.96	1179.38	1593.58	574.56	127.68	1852.12	2264.8	10965.6	5375.2	4196
128856	72623.4	167.31	4096.62	2954.99	618.03	1747.27	4265.17	1156.49	1174.96	670.32	2942.72	3532.8	15799.2	8656.8	5210.4
95671.2	42897.7	80.19	1382.04	1688.41	414.2	671.44	2343.5	645.28	563.92	326.04	2228.32	1500	4982.4	2709.6	1856
73496	59427.7	230.67	827.64	1492.21	487.23	466.52	2794.76	748.83	1070.08	313.12	1359.64	1104	1496	1684.8	1100
164607	80170.2	210.87	924.66	2284.64	596.23	477.42	2825.28	759.73	868.68	494.76	2077.84	828	724	1485.6	1034.4
101700	46023.1	153.45	1680.03	1744	452.35	755.37	3930.54	1090	1123.28	517.56	3249.76	896.8	3836.8	3299.2	1768
142434	98484.2	188.1	1004.85	3514.16	890.53	552.63	2861.25	1020.24	1106.56	495.52	2688.12	1124.8	660.8	1496	1228
119956	72958.1	148.5	1774.08	2238.86	613.67	801.15	2962.62	1234.97	664.24	266	1935.72	1337.6	5300.8	3173.6	1860.8
99208.8	80731.5	157.41	4661.91	2528.8	637.65	1899.87	4810.17	1393.02	1587.64	546.44	2085.44	3273.6	15990.4	9450.4	5844
92927.2	69256.4	160.38	3731.31	2680.31	563.53	1608.84	4887.56	1869.35	2067.2	674.12	3122.08	2698.4	12318.4	8262.4	5088.8
127581	85515.2	215.82	383.13	2504.82	729.21	490.5	405.48	952.66	313.12	204.44	3549.96	1048.8	671.2	481.6	567.2
99532	52007.7	83.16	2354.22	1912.95	447.99	1075.83	3412.79	1133.6	1043.48	443.84	1495.68	2032	8897.6	5000	3265.6
195110	71360.2	146.52	484.11	2663.96	524.29	197.29	101.37	1135.78	226.48	128.44	1689.48	393.6	377.6	208	324
121239	77348.7	220.77	1556.28	2386.01	663.81	951.57	727.03	900.34	312.36	221.16	1133.92	1556.8	5598.4	2475.2	2228.8
153259	55290.5	200.97	3189.78	2961.53	774.99	1374.49	3252.56	1422.45	1290.48	237.88	1719.88	2322.4	12721.6	6438.4	4256
Single Cells
Patient 18: Behcets Disease
69685.6	41485.9	83.16	559.35	1084.55	388.04	364.06	1445.34	560.26	647.52	672.6	4214.96	502.4	790.4	932	671.2
144739	68501.1	245.52	2636.37	2377.29	710.68	1266.58	2951.72	1309.09	1472.12	807.12	3861.56	1588.8	7263.2	5081.6	3192.8
117285	50159.3	156.42	966.24	1733.1	482.87	443.63	1846.46	404.39	718.96	256.12	2414.52	506.4	2497.6	1444.8	940
128037	95920.1	345.51	576.18	2604.01	752.1	373.87	710.68	1088.91	350.36	288.8	2590.84	2080	848.8	481.6	1040
152938	120962	179.19	435.6	2837.27	779.35	558.08	421.83	1293.83	430.16	237.12	4259.04	491.2	1021.6	506.4	793.6
99334.4	42433.4	149.49	1559.25	1081.28	286.67	713.95	1530.36	1156.49	633.84	523.64	2613.64	1008.8	5337.6	2804	1756.8
106705	77400.2	195.03	4637.16	2806.75	683.43	1819.21	5194.94	1321.08	1530.64	826.12	2720.04	4968	19770.4	10795.2	6993.6
105429	84817.3	232.65	1836.45	2680.31	659.45	1003.89	3713.63	1381.03	1529.88	399	2281.52	1498.4	6598.4	4520.8	2802.4
98943.2	59200	85.14	1372.14	1432.26	430.55	586.42	1874.8	537.37	755.44	348.08	2628.08	1056.8	4948.8	2866.4	1802.4
123913	58304.1	80.19	1726.56	2284.64	471.97	965.74	2483.02	585.33	708.32	471.96	2786.16	1213.6	6860	3734.4	2328.8
82009.6	54159.9	48.51	1806.75	1945.65	343.35	973.37	1585.95	711.77	981.16	440.8	3471.68	1484	7768	3860.8	2361.6
139722	77686.3	202.95	1896.84	1904.23	486.14	693.24	2659.6	606.04	794.96	423.32	2515.6	1348.8	6752.8	3516.8	2400.8
92245.6	87707.1	160.38	2338.38	1946.74	782.62	1341.79	4297.87	1214.26	1610.44	699.96	4400.4	1704.8	8872	5536	3666.4
121525	68831.7	103.95	2527.47	2516.81	534.1	1172.84	3868.41	1133.6	1687.2	967.48	4375.32	1528	7393.6	6170.4	3326.4
86703.2	49443.6	117.81	1926.54	1976.17	488.32	839.3	1582.68	437.09	842.84	347.32	2656.96	1435.2	6886.4	3376.8	2357.6
134767	83506.5	157.41	3288.78	2884.14	692.15	1006.07	1192.46	988.63	760.76	231.04	1925.08	2036.8	10083.2	5420	4155.2
90148.8	53061	82.17	2237.4	1559.79	424.01	826.22	1688.41	1281.84	976.6	386.08	2991.36	1729.6	8679.2	4468.8	2625.6
25237.6	75786.5	174.24	1249.38	2553.87	566.8	757.55	2680.31	1258.95	1127.84	608.76	3512.72	1038.4	3118.4	2361.6	1508
160245	95198.4	141.57	481.14	2378.38	654	337.9	202.74	1020.24	155.8	115.52	2088.48	478.4	477.6	178.4	468
99385.6	59296.1	182.16	2386.89	2057.92	578.79	1134.69	2363.12	975.55	902.88	348.84	4100.2	1715.2	9052	4706.4	3060.8
115084	57282.4	157.41	1484.01	2040.48	628.93	979.91	3504.35	1141.23	1149.12	693.88	3847.12	1150.4	6176	3755.2	2105.6
98647.2	52465.1	225.72	1226.61	1533.63	343.35	620.21	1874.8	1024.6	826.88	255.36	3210.24	802.4	3060.8	2214.4	1149.6
143005	85837	182.16	1082.07	2915.75	693.24	342.26	1352.69	684.52	1122.52	512.24	1675.8	339.2	396	1988	1342.4
116454	82420.5	179.19	1708.74	2649.79	783.71	1055.12	2863.43	1311.27	1057.16	258.4	2004.12	1511.2	6800	3969.6	2255.2
84752.8	82421.5	170.28	1506.78	1563.06	513.39	252.88	2787.13	786.98	1044.24	401.28	909.72	586.4	439.2	1996.8	1752.8
123960	101646	173.25	1668.15	3387.72	735.75	383.68	2874.33	1066.02	1207.64	726.56	2275.44	611.2	553.6	2557.6	1958.4
113255	71691.8	176.22	1460.25	2056.83	587.51	813.14	2718.46	947.21	728.84	271.32	2818.84	923.2	4443.2	3032	1896.8
98456	58696.1	186.12	2948.22	2717.37	612.58	1232.79	3501.08	1030.05	859.56	837.52	3534	1554.4	8867.2	5087.2	3175.2
126965	79743.5	151.47	730.62	2465.58	568.98	477.42	796.79	982.09	498.56	490.2	3094.72	548	2831.2	1586.4	1200
52309.6	86459.7	97.02	1099.89	1965.27	488.32	549.36	1906.41	609.31	716.68	448.4	2390.96	1006.4	3718.4	2058.4	1273.6
126752	70925.6	125.73	1456.29	1906.41	438.18	676.89	1803.95	561.35	572.28	123.12	2406.92	1027.2	4844.8	2633.6	1732
132207	59654.4	210.87	5702.4	2961.53	626.75	2051.38	3618.8	1825.75	1898.48	973.56	4152.64	3092	17300	9676	6691.2
153487	60429.6	99.99	494.01	3000.77	592.96	424.01	2451.41	963.56	750.88	313.12	2818.08	720	1176	1304	655.2
42273.6	107410	269.28	1957.23	2416.53	463.25	312.83	311.74	1196.82	513.76	949.24	2318	705.6	328	428	1636
108489	85592.4	203.94	1968.12	3166.45	815.32	1319.99	3121.76	1471.5	1301.12	631.56	5049.44	1527.2	6940.8	4201.6	2515.2
115570	57357.6	145.53	1821.6	1786.51	515.57	918.87	4760.03	1035.5	1877.2	577.6	1972.2	1405.6	7056	4860.8	2485.6
108454	65790.4	119.79	568.26	1590.31	310.65	500.31	2358.76	809.87	1078.44	376.2	3141.84	527.2	648	1724	860.8
141515	88862.4	127.71	1102.86	2510.27	694.33	299.75	1549.98	688.88	723.52	427.88	1711.52	166.4	294.4	2096.8	1320
125251	58767.4	151.47	1628.55	1615.38	502.49	902.52	4782.92	709.59	1593.72	427.12	2845.44	938.4	4224.8	3756.8	1940
92173.6	76908.1	214.83	1268.19	1926.03	548.27	850.2	2031.76	977.73	661.2	592.04	2243.52	1010.4	4129.6	2640.8	1607.2
135475	74307.4	202.95	825.66	2866.7	842.57	736.84	3501.08	1169.57	1672.76	537.32	3543.12	239.2	196.8	2783.2	1432
87441.6	85855.8	220.77	848.43	3024.75	708.5	410.93	503.58	1033.32	424.84	399	1077.68	577.6	476.8	608	869.6
129807	58032.8	150.48	2399.76	2068.82	622.39	1128.15	4103.85	1039.86	1371.04	589	4847.28	1338.4	6799.2	4435.2	2649.6
195511	76497.3	297	362.34	3002.95	774.99	381.5	1038.77	1243.69	245.48	160.36	1996.52	360	154.4	339.2	204
137308	76619.1	228.69	1101.87	2412.17	825.13	416.38	1288.38	1569.6	473.48	547.96	1711.52	332.8	331.2	944	1264
79930.4	90937.4	236.61	3654.09	2556.05	669.26	1633.91	2188.72	1399.56	615.6	547.96	2242.76	2855.2	14620	7409.6	5352
103998	67976.4	98.01	3651.12	1823.57	419.65	1625.19	4086.41	966.83	1138.48	445.36	4026.48	2579.2	14097.6	7154.4	4462.4
100776	37801.2	114.84	748.44	1214.26	352.07	564.62	3213.32	816.41	1109.6	364.8	1313.28	574.4	2764	2212	818.4
124739	104447	184.14	415.8	3026.93	753.19	692.15	577.7	974.46	216.6	324.52	2297.48	641.6	532	408	481.6
93719.2	55647.9	99.99	2207.7	2086.26	672.53	1000.62	2947.36	948.3	994.08	447.64	2751.96	1680.8	8790.4	4732	3142.4
83742.4	56861.6	113.85	1013.76	2312.98	521.02	729.21	2150.57	763	658.16	397.48	2123.44	848	3380	2112.8	1432
69041.6	51300.8	168.3	1370.16	2295.54	555.9	812.05	3123.94	1099.81	1498.72	235.6	2897.88	836.8	3652.8	3578.4	1888
105857	61469.1	146.52	1698.84	2208.34	421.83	1177.2	3546.86	1061.66	1327.72	563.92	4409.52	1221.6	6152	3885.6	2088.8
98022.4	64253	184.14	777.15	2622.54	536.28	428.37	1994.7	778.26	1139.24	255.36	2961.72	504.8	672.8	1740.8	897.6
69298.4	47027	120.78	819.72	2101.52	461.07	416.38	1908.59	1018.06	873.24	585.96	3333.36	1311.2	2948	1958.4	1430.4
171354	150456	329.67	2489.85	2454.68	862.19	1504.2	2859.07	1672.06	1831.6	1295.8	7611.4	2808	8148	4504	3204
104260	58781.2	152.46	1912.68	2146.21	588.6	982.09	2157.11	1025.69	1051.84	786.6	2232.12	1300.8	6243.2	3632	2416
135589	72427.4	141.57	1317.69	2286.82	586.42	840.39	3169.72	1188.1	1047.28	403.56	3315.12	1037.6	4532	2976.8	1914.4
153742	70946.4	224.73	1216.71	2237.77	713.95	549.36	200.56	850.2	291.08	406.6	1355.08	752	3016	1738.4	1513.6
100606	74394.5	175.23	1369.17	3105.41	637.65	967.92	3559.94	1073.65	1288.96	478.8	3723.24	1153.6	5164.8	3361.6	1731.2
96759.2	56022.1	174.24	1990.89	2714.1	601.68	960.29	2672.68	674.71	1395.36	596.6	3663.96	1278.4	5720	3860	2624.8
105378	65056.9	170.28	2420.55	2691.21	554.81	1073.65	3028.02	814.23	1179.52	264.48	2655.44	1573.6	8303.2	4976	2780.8
165216	73585.7	141.57	338.58	2051.38	572.25	291.03	223.45	671.44	363.28	122.36	1563.32	263.2	378.4	552	473.6
52157.6	51742.3	94.05	1199.88	1569.6	474.15	527.56	1855.18	616.94	761.52	266.76	1226.64	938.4	4151.2	2736	1421.6
126645	42086.9	67.32	745.47	1588.13	395.67	425.1	2503.73	585.33	862.6	479.56	1966.88	564	1887.2	1592	794.4
64216.8	73863.9	176.22	2264.13	1679.69	455.62	937.4	1872.62	566.8	690.08	297.92	2426.68	1519.2	7948.8	4094.4	2812
134142	78779.2	116.82	969.21	2854.71	836.03	330.27	1423.54	881.81	1369.52	177.08	1678.84	372	217.6	2390.4	1485.6
137622	83332.3	194.04	2966.04	2312.98	570.07	924.32	1409.37	864.37	541.88	597.36	1542.04	1684.8	7291.2	4232.8	3639.2
78070.4	53996.6	197.01	2520.54	1870.44	571.16	890.53	2924.47	869.82	1074.64	376.96	1890.12	1600.8	7797.6	4440.8	2799.2
123482	99765.3	233.64	3004.65	2134.22	626.75	1526	4156.17	1428.99	1263.12	588.24	4272.72	1953.6	9256.8	5451.2	3268
107294	67853.6	86.13	2288.88	2297.72	684.52	1037.68	3319.05	1067.11	1067.8	347.32	3707.28	1750.4	7652.8	4136	2761.6
93991.2	51041.4	109.89	2834.37	1682.96	377.14	1075.83	1593.58	790.25	835.24	117.8	2175.12	2186.4	10720.8	5340	3648.8
71456	51533.5	184.14	1161.27	1991.43	573.34	677.98	1987.07	736.84	539.6	592.8	2929.8	916.8	4082.4	2533.6	1436.8
87140.8	96417.1	188.1	1226.61	1904.23	660.54	673.62	2639.98	926.5	731.88	360.24	1535.2	935.2	3936	2790.4	1385.6
181825	94386.6	234.63	1854.27	2804.57	805.51	759.73	284.49	1193.55	490.96	429.4	2262.52	1180	4717.6	2566.4	2175.2
127416	88411	137.61	650.43	3081.43	584.24	531.92	1322.17	991.9	633.08	406.6	2508.76	372.8	832	1276	751.2
74115.2	109454	186.12	2041.38	2293.36	719.4	1075.83	4772.02	1350.51	2216.16	1148.36	4459.68	1460.8	5908.8	4306.4	2651.2
15740.8	64058.9	243.54	830.61	1338.52	525.38	584.24	2314.07	1195.73	832.96	943.92	2818.08	425.6	649.6	1226.4	1352
138557	81794.8	220.77	1120.68	3651.5	951.57	852.38	3284.17	1370.13	1401.44	215.84	2461.64	798.4	3376.8	2993.6	1488.8
43293.6	57997.2	155.43	1852.29	1850.82	346.62	852.38	1802.86	1154.31	797.24	633.08	2663.04	2225.6	6737.6	3700	2524
100198	63910.4	155.43	2121.57	1952.19	443.63	1061.66	4498.43	1135.78	1036.64	288.04	2577.92	1630.4	7284.8	5020.8	2793.6
99284.8	65718.2	273.24	1148.4	1944.56	611.49	820.77	2345.68	818.59	1070.84	574.56	3055.96	616.8	1504	2007.2	1401.6
64265.6	64361.9	135.63	1781.01	1885.7	468.7	1009.34	2617.09	1207.72	991.8	285	1897.72	2239.2	7281.6	4285.6	2556.8
107780	48253.6	111.87	3343.23	1962	371.69	1153.22	2650.88	1038.77	779	205.96	2741.32	2217.6	12959.2	6660	4269.6
160458	59467.3	220.77	1143.45	2320.61	708.5	558.08	1168.48	1129.24	1014.6	560.12	2544.48	386.4	1745.6	2134.4	1913.6
110127	62929.3	118.8	533.61	2702.11	739.02	441.45	1401.74	1408.28	437.76	145.16	1421.2	514.4	2434.4	1622.4	1037.6
140253	75090.5	271.26	1524.6	2898.31	723.76	913.42	4645.58	1784.33	2037.56	578.36	3591	658.4	1903.2	3007.2	1515.2
153981	62461.1	103.95	3280.86	2573.49	630.02	1663.34	2845.99	1074.74	1022.2	228	1532.92	2104.8	12873.6	6800.8	4009.6
81260.8	83642.1	249.48	2766.06	2764.24	740.11	1047.49	2926.65	1361.41	1411.32	573.8	3733.88	2619.2	8552.8	4836	3192
122841	36566.6	105.93	1467.18	1876.98	485.05	650.73	2612.73	763	620.92	461.32	1258.56	996	5472	3524.8	2080.8
97521.6	41663.2	102.96	1318.68	885.08	327	559.17	1879.16	427.28	737.96	140.6	1827.8	712	4136	2399.2	1273.6
113824	79367.3	111.87	809.82	2920.11	676.89	437.09	218	724.85	680.2	317.68	911.24	342.4	348.8	1776.8	1158.4
119009	101583	193.05	291.06	1978.35	594.05	244.16	124.26	450.17	198.36	86.64	873.24	511.2	328.8	228	684
92990.4	54544.1	91.08	1126.62	1218.62	497.04	607.13	1753.81	918.87	622.44	395.2	2322.56	866.4	3848.8	2464	1265.6
132302	77040.8	209.88	764.28	2614.91	537.37	348.8	207.1	739.02	612.56	358.72	2772.48	244	265.6	1064.8	867.2
128372	64692.5	220.77	406.89	3339.76	892.71	436	1000.62	1242.6	893	197.6	3857.76	681.6	394.4	901.6	596
61760	98398.1	161.37	2243.34	2289	517.75	245.25	873.09	1464.96	1188.64	554.04	2073.28	547.2	329.6	2181.6	2480
89764	76450.8	178.2	1581.03	1883.52	536.28	865.46	3018.21	1131.42	1656.04	310.08	3005.04	1060.8	4154.4	2973.6	1797.6
132479	55189.5	161.37	467.28	1815.94	530.83	342.26	1511.83	588.6	622.44	139.84	1967.64	187.2	794.4	944.8	526.4
223544	114856	286.11	909.81	3407.34	953.75	763	2766.42	1829.02	1309.48	836	3765.04	1198.4	592	1474.4	1240
Single Cells
Patient 19: Behcets Disease
149003	83251.4	156.06	2255.22	3549.94	685.82	1081.2	3411.08	1723.56	1763.28	650.96	2835.31	2860.16	8500.94	4835.54	3248.84
81406.3	89279.6	146.88	3122.22	3862.64	931.74	1463.86	3589.16	1951.46	1955.25	694.41	7050.75	3535.84	12215.5	6676.44	4332.06
106507	66187.8	119.34	1461.66	2899.1	628.58	554.38	3170.46	952.94	1514.43	584.6	5225.85	1914.7	5341.48	3941.74	2095.1
120163	88955.2	136.68	2205.24	2803.7	585.12	1017.6	5504.58	933.86	2027.93	982.76	1981.32	2191.04	7065.94	5188.96	2409.98
89685	69889.4	72.42	1081.2	2917.12	603.14	572.4	3609.3	966.72	1740.37	635.95	4245.46	1524.38	4585.44	3373.48	1626.88
113799	90211.9	221.34	983.28	3879.6	746.24	539.54	4329.04	1034.56	2181.19	1548.4	2382.64	1129.96	695.36	2622.36	1505.52
85584.2	77671	158.1	2420.46	3230.88	701.72	1195.68	4909.92	1619.68	2098.24	975.65	4688.65	2286.16	7781.8	5945	3152.9
132095	69205	135.66	1349.46	3213.92	648.72	924.32	3079.3	979.44	1773.55	718.9	4190.16	2117.24	5249.64	3887.62	1890.1
164036	96679.7	197.88	2258.28	4237.88	797.12	862.84	2506.9	1332.42	2172.5	869.79	4235.98	2226.3	4579.7	4277.12	2832.28
169507	83151.4	169.32	2619.36	4358.72	1005.94	1386.48	6048.36	1387.54	2352.62	716.53	4828.48	2130.36	9239.76	6304.98	3029.9
100758	82710.8	120.36	2389.86	2908.64	746.24	975.2	3281.76	1301.68	1397.51	493.75	2927.74	2472.3	6889.64	5646.52	3198
132525	50551.2	91.8	1396.38	2598.06	644.48	575.58	2976.48	750.48	1009.62	335.75	3142.62	1303.8	5440.7	3659.66	1823.68
106595	46564	65.28	1440.24	2060.64	379.48	504.56	2282.18	888.28	1247.41	559.32	5222.69	1359.56	4691.22	3007.76	1822.04
93731.7	66010.3	51	2475.54	3707.88	822.56	1069.54	2854.58	1423.58	1643.99	1222.13	8495.66	2320.6	9316.02	5343.12	3361.18
103090	60833.8	74.46	1545.3	3072.94	479.12	634.94	2766.6	598.9	1267.16	659.65	4166.46	1410.4	5920.4	3639.16	2093.46
91030.7	85050.7	136.68	2659.14	2743.28	760.02	1356.8	5877.7	1308.04	2084.81	1059.39	4138.81	2364.88	8723.16	6210.68	3343.14
86186.9	50102.4	121.38	588.54	2701.94	546.96	580.88	4036.48	2146.5	1625.03	707.05	7043.64	1180.8	1955.7	2624.82	1035.66
114655	69018.3	74.46	1660.56	3389.88	748.36	938.1	2710.42	909.48	1331.15	911.66	4954.09	1962.26	6660.86	3735.92	2405.06
150684	94556	108.12	902.7	4958.68	962.48	400.68	1398.14	1539.12	1241.09	711.79	6025.33	1543.24	686.34	933.16	1156.2
120269	65025	112.2	2073.66	3273.28	800.3	1032.44	1624.98	1224.3	1047.54	632.79	8130.68	1356.28	6883.9	3416.94	2408.34
122934	82152.8	140.76	2418.42	3666.54	828.92	1192.5	6032.46	1409.8	2569.08	1624.24	5221.11	2597.76	7840.84	5648.16	3380.86
123594	119010	148.92	2801.94	4271.8	995.34	1469.16	6604.86	1459.62	2251.5	963.8	5473.91	2911	9343.9	6491.94	3473.52
123540	55374.8	81.6	2011.44	1918.6	472.76	672.04	2806.88	590.42	996.98	534.04	2577.77	1798.26	7616.16	4234.48	2989.72
88159	75788	117.3	2602.02	3187.42	613.74	1367.4	3951.68	1309.1	2166.97	1139.18	5449.42	2922.48	9768.66	5901.54	3643.26
103935	66141.9	123.42	1215.84	2841.86	651.9	639.18	2231.3	983.68	1224.5	597.24	6226.78	1789.24	5455.46	3406.28	2059.84
70610.2	38112.3	4.08	844.56	1749	324.36	276.66	3720.6	1231.72	1414.1	1320.88	4436.64	1490.76	2703.54	2342.74	1289.86
191805	72112	127.5	1254.6	4341.76	906.3	266.06	2000.22	1080.14	1332.73	2768.95	3199.5	571.54	677.32	2498.54	2013.1
144845	69656.8	105.06	2459.22	3649.58	825.74	1291.08	6615.46	2088.2	2740.51	817.65	5601.1	2701.08	9299.62	6962.62	3685.08
58594.7	74653.8	171.36	1865.58	2280.06	528.94	1094.98	1705.54	912.66	1392.77	670.71	5011.76	1919.62	7120.88	3964.7	2576.44
98220.4	75020	138.72	1903.32	3582.8	766.38	970.96	3244.66	1790.34	1761.7	897.44	4849.81	2150.04	7088.9	4686.3	2769.96
124824	116104	106.08	2278.68	6476.6	1092.86	608.44	4867.52	2088.2	3115.76	1126.54	7117.9	1782.68	2168.9	6084.4	3420.22
110292	73333.9	167.28	983.28	3463.02	645.54	593.6	1899.52	684.76	1606.86	555.37	3054.14	1439.1	3568.64	2506.74	1590.8
174503	234159	568.14	3539.4	4361.9	1204.16	1477.64	4112.8	2082.9	2494.03	2973.56	6521.45	4928.2	8042.56	4896.22	6769.92
121380	67507.7	89.76	1698.3	2433.76	568.16	730.34	2622.44	1707.66	1470.19	1077.56	6958.32	1898.3	5733.44	3731.82	2222.2
81704.8	76499	130.56	1053.66	2878.96	609.5	685.82	2730.56	1894.22	1794.88	703.89	5733.82	1479.28	3356.26	3107.8	1334.96
109039	65169.8	172.38	2597.94	3375.04	775.92	901	3522.38	1018.66	1493.89	1134.44	3756.45	1922.9	9161.86	5297.2	3220.14
103323	84167.3	98.94	2315.4	4143.54	782.28	1034.56	3228.76	1617.56	2025.56	1049.91	7190.58	2573.16	8660.02	5344.76	3223.42
165489	71176.6	119.34	2430.66	4079.94	763.2	999.58	3386.7	2162.4	1542.87	473.21	4100.1	2364.88	8874.86	5100.4	3216.86
198913	189281	223.38	2667.3	2661.66	712.32	1436.3	3758.76	2276.88	1343.79	707.84	3667.18	3118.46	10114.7	5839.22	3732.64
99903.9	76550	165.24	1373.94	4215.62	928.56	649.78	4506.06	1903.76	2211.21	1173.15	3854.41	1312	1091.42	4547.72	2305.84
229937	76498	202.98	2944.74	4777.42	972.02	754.72	4733.96	1464.92	3141.83	1084.67	5024.4	1553.9	3165.2	6561.64	3951.58
137082	57191.4	56.1	2128.74	2942.56	694.3	1172.36	3018.88	924.32	1694.55	730.75	6196.76	1731.84	8022.88	4392.74	3130.76
110767	93509.5	205.02	2817.24	3526.62	779.1	1292.14	5079.52	1463.86	2235.7	774.2	5057.58	3241.46	10365.6	6535.4	3643.26
154302	91107.4	187.68	3139.56	3567.96	881.92	1327.12	1828.5	1140.56	927.46	474.79	2449.79	2913.46	11506.2	5676.04	4177.08
127063	48736.6	103.02	1650.36	3010.4	497.14	860.72	5646.62	1407.68	1937.87	404.48	3447.56	1599.82	5315.24	4828.98	2158.24
116809	55767.5	92.82	1143.42	2872.6	677.34	491.84	3795.86	1000.64	1951.3	1077.56	6279.71	1098.8	3401.36	3027.44	1641.64
136964	90876.9	193.8	621.18	4925.82	1018.66	552.26	1839.1	1315.46	830.29	510.34	3173.43	1155.38	577.28	1280.84	970.88
180830	88044.4	214.2	1907.4	4954.44	1158.58	703.84	3947.44	2592.76	3135.51	1291.65	9677.5	1526.02	1076.66	5015.12	3331.66
106962	69333.5	146.88	1879.86	3472.56	864.96	887.22	4197.6	1485.06	1909.43	1081.51	6250.48	2127.08	6057.34	4629.72	2272.22
84145.1	68784.7	162.18	3325.2	3503.3	786.52	1595.3	4220.92	1150.1	2140.9	968.54	6887.22	3131.58	12837.9	7343.92	4449.32
84177.9	69705.8	139.74	1327.02	3063.4	641.3	967.78	6223.26	1316.52	2309.96	695.2	4637.3	1576.86	4612.5	4597.74	1936.84
67760.7	63414.4	65.28	1632	3010.4	683.7	686.88	2981.78	1477.64	1711.93	957.48	5861.8	1787.6	5717.86	3872.04	2352.58
111164	74232.5	141.78	2103.24	2541.88	396.44	932.8	1782.92	750.48	1004.09	957.48	3125.24	1729.38	6737.94	3895	2511.66
87386.6	60188.2	29.58	495.72	2439.06	698.54	425.06	5428.26	1294.26	2351.04	366.56	4500.63	901.18	637.96	2777.34	924.14
118643	57739.1	26.52	1944.12	2996.62	581.94	894.64	2740.1	993.22	1503.37	637.53	3299.83	1803.18	7337.36	4415.7	2601.86
251760	226724	763.98	4299.3	3336.88	1119.36	1846.52	4973.52	2061.7	2562.76	3364.61	4175.15	6528.84	9413.6	6504.24	8202.46
105866	98269.9	224.4	3886.2	4140.36	937.04	1094.98	3139.72	1503.08	2418.19	3225.57	3532.88	2812.6	7873.64	7466.1	5753.12
149876	62187.4	115.26	2594.88	2980.72	562.86	1199.92	4339.64	1150.1	1921.28	900.6	5465.22	2787.18	10602.6	5768.7	3024.16
62798.9	92452.8	156.06	2801.94	4054.5	784.4	1409.8	4365.08	1436.3	2621.22	1016.73	8823.51	2827.36	11638.3	6833.06	3862.2
212449	163126	311.1	2852.94	3041.14	824.68	1575.16	3451.36	1914.36	1741.16	1060.97	5179.24	3510.42	9298.8	5379.2	3870.4
219671	125993	177.48	3873.96	6212.66	1378	1995.98	5903.14	2401.96	2584.88	1078.35	9941.36	3801.52	14336.1	9129.06	4974.94
87573.5	63870.4	96.9	1664.64	2913.94	591.48	666.74	2958.46	862.84	1421.21	475.58	1952.09	1839.26	6510.8	4012.26	2284.52
87340.7	81978.4	127.5	3334.38	2398.78	580.88	1729.92	3468.32	1293.2	1768.81	975.65	7244.3	2996.28	13759.6	7222.56	4525.58
133448	74447.8	126.48	2416.38	3120.64	548.02	1161.76	3964.4	666.74	1542.87	729.17	3731.17	2517.4	9882.64	5993.38	3421.86
154560	259721	544.68	4405.38	4783.78	1262.46	1566.68	3478.92	1889.98	2302.06	3076.26	7794.14	5625.2	10455.8	5993.38	7840.84
78510.9	68467.5	116.28	1995.12	2260.98	484.42	965.66	3373.98	1688.58	1251.36	770.25	6952	1846.64	8428.78	4901.14	3144.7
148708	62212.9	45.9	2017.56	2775.08	445.2	1100.28	2407.26	894.64	892.7	409.22	2120.36	2017.2	9110.2	4861.78	2976.6
131581	54188.5	118.32	2223.6	3320.98	549.08	1313.34	3012.52	1065.3	1730.89	1216.6	5711.7	2141.84	8754.32	5056.12	3063.52
99589	59414	76.5	2000.22	3349.6	626.46	1009.12	2708.3	1056.82	1523.91	662.81	5744.09	2120.52	8336.94	4933.94	3059.42
166975	61526.4	88.74	1785	1850.76	470.64	1010.18	2758.12	1012.3	1281.38	751.29	2648.08	1949.96	7437.4	4266.46	2947.08
153242	61907.9	59.16	1854.36	2481.46	519.4	967.78	2696.64	1169.18	1859.66	907.71	5987.41	1824.5	7534.98	4194.3	2533.8
112945	96953	78.54	1617.72	3309.32	638.12	454.74	4195.48	2363.8	2444.26	944.05	5089.97	1632.62	762.6	3597.34	2225.48
124399	68901	93.84	2761.14	2827.02	667.8	1040.92	3794.8	1257.16	1636.88	752.08	6666.81	2498.54	11603	5902.36	4236.12
98923.2	54615.9	72.42	1361.7	2199.5	650.84	690.06	3959.1	1069.54	2003.44	274.92	3936.57	1498.14	4910.98	3987.66	1451.4
76643.8	51655.9	52.02	1659.54	1558.2	400.68	780.16	1902.7	588.3	1103.63	133.51	1726.15	1676.08	6502.6	3761.34	2204.16
162513	74434.5	133.62	940.44	3165.16	692.18	436.72	2898.04	1181.9	1188.95	548.26	3539.99	1157.02	1250.5	1852.38	1295.6
107771	49945.3	8.16	997.56	2257.8	521.52	310.58	2240.84	1176.6	1419.63	496.12	6386.36	1213.6	3403.82	2660.9	1239.84
132323	75299.5	151.98	2845.8	3354.9	712.32	1533.82	8247.86	2500.54	2482.97	953.53	4584.37	2566.6	9141.36	7392.3	3180.78
121772	64746.5	100.98	2477.58	2935.14	860.72	1060	1970.54	729.28	890.33	576.7	2321.81	2387.84	10115.5	4711.72	3694.92
81174.3	48514.3	108.12	168.3	2527.04	425.06	484.42	3241.48	1210.52	1666.11	688.88	7936.34	638.78	938.9	1602.28	696.18
134489	80360.7	182.58	2329.68	3899.74	852.24	1078.02	4561.18	1330.3	2012.92	1395.14	2863.75	2163.16	7561.22	5562.88	2982.34
120452	58430.7	89.76	2343.96	2739.04	470.64	1086.5	3201.2	1081.2	1384.08	671.5	4981.74	2002.44	8917.5	5357.88	2786.36
140155	102217	146.88	766.02	3308.26	769.56	417.64	5563.94	1672.68	2098.24	917.19	5498.4	1496.5	814.26	2464.1	839.68
102229	68653.1	52.02	2448	3592.34	743.06	1089.68	2616.08	1788.22	1692.97	1036.48	6578.33	2438.68	10628.8	6089.32	3300.5
63720.6	125123	199.92	3313.98	4003.62	768.5	1626.04	8351.74	1526.4	3123.66	1010.41	5092.34	2847.04	10587.8	8473.88	4286.96
115850	56954.8	112.2	1715.64	2907.58	525.76	696.42	3281.76	1243.38	1870.72	741.81	7265.63	1484.2	5867.92	4092.62	1933.56
131680	87696.5	132.6	3015.12	3876.42	979.44	1190.38	4957.62	2454.96	2432.41	2659.14	6056.14	2528.88	8204.1	5935.98	4071.3
108797	56307.1	59.16	644.64	2281.12	480.18	567.1	5179.16	1096.04	1656.63	268.6	2558.02	938.08	649.44	2852.78	570.72
97657.1	67270	135.66	1845.18	3086.72	744.12	930.68	4431.86	992.16	1967.89	615.41	2562.76	2185.3	6414.04	4565.76	2428.02
107514	53638.7	75.48	2274.6	3039.02	548.02	1200.98	3392	1637.7	1567.36	854.78	7530.28	2289.44	10053.2	5513.68	3471.06
129335	62117	140.76	2486.76	3747.1	815.14	1356.8	3270.1	1527.46	1414.1	965.38	5334.87	2616.62	10227.9	5940.9	3649.82
102787	57187.3	80.58	1161.78	2739.04	545.9	469.58	998.52	2240.84	1199.22	696.78	3950	1084.04	715.86	2410.8	2052.46
123527	71243.9	96.9	2106.3	3771.48	816.2	978.38	4148.84	1944.04	2272.04	1455.18	9435.76	2374.72	6757.62	4563.3	2715.84
112042	95442.4	129.54	1821.72	2823.84	595.72	1155.4	3970.76	687.94	1877.83	964.59	5701.43	1801.54	6084.4	4332.06	2268.94
129011	72578.1	149.94	1078.14	2962.7	640.24	650.84	6138.46	707.02	2546.17	647.8	2336.82	1594.9	2548.56	3688.36	1500.6
114300	58518.4	38.76	859.86	2695.58	492.9	530	2247.2	818.32	1256.1	756.03	4597.8	1219.34	2920.02	2359.14	1423.52
121103	66968.1	104.04	1693.2	3362.32	746.24	1018.66	3247.84	968.84	1470.98	1250.57	4850.6	1985.22	6646.1	4326.32	2720.76
114850	64136.6	160.14	2534.7	3812.82	898.88	1329.24	2969.06	1087.56	1294.02	914.82	5037.83	2334.54	9109.38	5289.82	3325.1
72201	55729.7	133.62	1754.4	2533.4	682.64	683.7	2624.56	1337.72	1147.08	308.1	3038.34	1631.8	6468.98	4005.7	2341.92
116507	72229.3	147.9	1675.86	3773.6	820.44	814.08	4089.48	1243.38	1676.38	751.29	6244.16	1955.7	5976.16	4244.32	2255.82
Single Cells
Patient 20: Behcets Disease
98690.3	58828.5	89.76	2254.2	2554.6	533.18	1140.56	6946.18	2097.74	2795.81	1417.26	8727.92	1911.42	8397.62	6591.98	3074.18
137164	67103.8	140.76	1236.24	1817.9	567.1	787.58	5462.18	1986.44	2993.31	1192.9	7590.32	1310.36	4518.2	4207.42	1931.92
132077	76208.3	180.54	2269.5	1870.9	509.86	1074.84	6736.3	1963.12	2864.54	970.91	8096.71	1889.28	8077	5829.38	2827.36
125872	80641.2	135.66	3163.02	4505	1043.04	1577.28	8240.44	1556.08	3556.58	1050.7	10921	2701.9	12038.4	8606.72	4221.36
153869	209806	553.86	2421.48	1397.08	721.86	1279.42	668.86	1396.02	559.32	4860.87	2640.97	2872.46	4643.66	2402.6	4358.3
160015	57712.6	87.72	2719.32	2566.26	514.1	1081.2	6722.52	1910.12	2693.9	1342.21	6779.78	1968	9295.52	6405.84	3359.54
102200	107211	81.6	2793.78	3738.62	800.3	1457.5	4844.2	1920.72	2743.67	774.99	9748.6	2327.98	11175	7058.56	3867.94
111732	63134.9	73.44	808.86	3809.64	906.3	387.96	2239.78	1737.34	1425.95	1693.76	5334.87	701.92	523.98	2578.08	1554.72
135319	144962	484.5	3449.64	1979.02	712.32	1352.56	518.34	738.82	486.64	5265.35	3132.35	3239.82	8796.14	4245.96	5807.24
103927	163579	658.92	4428.84	1843.34	661.44	1415.1	808.78	1557.14	1185	6286.82	3445.98	4273.84	11457	5198.8	7334.08
163747	203138	845.58	3395.58	2411.5	879.8	1319.7	1047.28	1478.7	1255.31	7659.84	4694.18	3699.02	5483.34	3121.74	6668.24
169591	37642.1	47.94	755.82	2645.76	570.28	416.58	222.6	1460.68	416.33	445.56	4103.26	509.22	1557.18	882.32	709.3
105211	56275.4	91.8	1775.82	2264.16	559.68	811.96	4252.72	857.54	2449	792.37	6244.95	1534.22	5824.46	4314.84	2007.36
83189.8	60244.3	114.24	1681.98	2953.16	542.72	1117.24	9276.06	2678.62	3871	1160.51	10368.8	1794.98	5089.74	5999.12	1991.78
89764.6	69709.9	169.32	2165.46	4455.18	983.68	1281.54	7324.6	1650.42	2958.55	1011.2	8614.16	2011.46	8308.24	6673.16	2974.14
138956	58302.2	75.48	2796.84	2491	426.12	1248.68	6719.34	3492.7	3013.85	1506.53	15759.7	1760.54	9643.2	6832.24	3275.08
104828	63735.7	105.06	2774.4	3835.08	843.76	1334.54	7246.16	3035.84	3105.49	1089.41	11060.8	2049.18	9984.32	7534.16	3866.3
89790	55258.5	43.86	3897.42	3441.82	575.58	1785.04	6386.5	2364.86	2902.46	1028.58	10263.7	2937.24	16358.2	9947.42	5612.9
115686	73768.4	76.5	1960.44	3785.26	768.5	1209.46	10520.5	1813.66	4716.3	925.09	4902.74	1797.44	5628.48	7448.06	2449.34
72731.5	110207	143.82	1257.66	3932.6	976.26	735.64	8371.88	1484	3592.92	497.7	3495.75	1134.88	694.54	5431.68	1749.88
84965.9	202873	496.74	2690.76	1717.2	782.28	1120.42	710.2	1352.56	530.88	4769.23	3250.06	3252.12	6739.58	2953.64	4901.14
106716	86301.2	167.28	2733.6	3527.68	775.92	1330.3	7536.6	2023.54	3495.75	810.54	7946.61	2543.64	10743.6	8149.16	3722.8
127857	67291.4	98.94	2615.28	2952.1	595.72	1535.94	11357.9	1928.14	4296.81	607.51	5774.11	2460.82	10251.6	10012.2	3598.16
103315	188466	668.1	3223.2	1376.94	684.76	1214.76	924.32	1266.7	891.91	6392.68	3037.55	3680.16	6119.66	3253.76	6504.24
96367.2	113713	224.4	5425.38	3907.16	779.1	2411.5	20824.8	1887.86	7008.88	1523.12	7681.17	4352.56	18748.5	16965	6871.6
102296	162493	610.98	2492.88	1460.68	740.94	799.24	601.02	934.92	755.24	5882.34	2994.89	3417.76	4878.18	2153.32	4990.52
125822	58520.5	105.06	3290.52	3670.78	808.78	1618.62	5806.68	1759.6	2336.03	1014.36	9969.8	3080.74	13944.9	8746.94	4188.56
64545.5	58874.4	115.26	1663.62	4549.52	829.98	1219	5312.72	2011.88	2234.91	1233.19	10305.5	1424.34	6682.18	5276.7	2357.5
151036	172162	689.52	3264	2079.72	757.9	1364.22	509.86	1622.86	629.63	5704.59	3015.43	4285.32	7214.36	3550.6	6458.32
179575	69009.1	173.4	1847.22	3858.4	778.04	1138.44	9650.24	2875.78	3438.08	1008.83	7433.9	1506.34	4602.66	6154.92	2479.68
100407	51376.4	56.1	2085.9	3488.46	730.34	942.34	3929.42	2115.76	2436.36	889.54	9372.56	1908.96	7849.04	5287.36	2783.9
188151	170922	821.1	3311.94	1670.56	805.6	1086.5	949.76	1510.5	796.32	7846.28	3461.78	3832.68	5302.12	2415.72	6382.06
116235	42730.9	40.8	1501.44	2460.26	482.3	854.36	4901.44	1791.4	2887.45	1566.57	10664.2	1308.72	5494	4563.3	2048.36
72214.9	195472	716.04	2655.06	1628.16	703.84	1000.64	495.02	1723.56	933.78	7091.83	3932.62	3781.84	4407.5	2090.18	5737.54
88736.3	85743.2	57.12	1133.22	3230.88	720.8	768.5	3663.36	1738.4	1887.31	620.15	8573.87	1493.22	4528.86	3430.06	1763
115184	49712.8	36.72	2736.66	4592.98	846.94	1401.32	5365.72	1933.44	2076.12	857.94	9081.05	2170.54	12454.2	7730.14	3724.44
114790	66499.9	114.24	870.06	2534.46	585.12	572.4	7800.54	2503.72	3239.79	782.1	5578.98	815.08	456.74	4491.14	858.54
115458	79789.5	116.28	1212.78	4643.86	853.3	725.04	1888.92	2428.46	1205.54	463.73	4453.23	1490.76	3063.52	2170.54	1327.58
83625.2	61803.8	120.36	2370.48	2939.38	639.18	1202.04	5708.1	1835.92	2708.12	1388.03	9441.29	2025.4	9881	6751.06	3498.12
77397.3	68064.6	81.6	2066.52	2149.68	608.44	1070.6	6927.1	1040.92	2553.28	697.57	5587.67	1854.84	7083.16	5651.44	2662.54
86466.5	49282.3	159.12	1991.04	3192.72	696.42	583	7687.12	2052.16	4236.77	1060.18	5190.3	1050.42	651.08	6489.48	2719.94
134101	48288.8	35.7	1067.94	1949.34	504.56	394.32	6142.7	1647.24	3179.75	936.15	8561.23	814.26	3412.84	4272.2	1280.84
114245	78621.6	140.76	4357.44	5008.5	1017.6	1955.7	11992.8	2643.64	4721.04	1147.87	10774	3179.96	15106	11606.3	5168.46
104242	58590.8	138.72	1911.48	3340.06	770.62	1199.92	6425.72	2390.3	3166.32	528.51	9498.96	2197.6	8466.5	6423.88	2939.7
79992.6	83695.1	124.44	3762.78	5329.68	1072.72	2204.8	6441.62	2609.72	3497.33	1064.92	10732.1	3242.28	16180.2	9951.52	5289.82
90095	144822	619.14	3607.74	1403.44	754.72	1300.62	811.96	1615.44	485.06	5784.38	2866.12	3799.88	7797.38	4119.68	6436.18
55618.1	46791.5	87.72	1241.34	3597.64	789.7	497.14	6267.78	2320.34	2933.27	1128.12	7439.43	813.44	626.48	3935.18	1653.12
84295.2	69388.6	133.62	2801.94	3578.56	768.5	1356.8	9391.6	2966.94	3957.9	684.93	9313.31	1793.34	7754.74	7978.6	3389.88
99472.6	68499.1	121.38	4277.88	2800.52	625.4	1666.32	10637.1	1802	3403.32	1694.55	3630.05	3024.98	14454.1	10755.9	5231.6
141852	62143.5	134.64	1127.1	2688.16	624.34	710.2	9110.7	2224.94	2782.38	1065.71	7091.83	1226.72	2908.54	4788.8	1458.78
117358	206102	996.54	2814.18	2080.78	856.48	986.86	656.14	1291.08	949.58	9005.21	4522.75	4343.54	4345.18	2384.56	6400.1
94947.8	57753.4	179.52	1423.92	2528.1	521.52	969.9	5525.78	1209.46	2427.67	688.09	4661	1099.62	4797.82	4702.7	1834.34
139748	55492.1	132.6	1626.9	3835.08	710.2	1038.8	6097.12	2069.12	2881.92	767.09	10830.9	1771.2	6112.28	5562.88	2224.66
112722	88224.9	153	1180.14	3807.52	649.78	747.3	5048.78	1502.02	1857.29	543.52	3748.55	1092.24	2829.82	3567	1587.52
156926	52121	119.34	2251.14	3168.34	652.96	1223.24	6221.14	1934.5	2689.16	683.35	6295.51	1744.96	8724.8	6582.96	2857.7
150570	66683.5	182.58	2727.48	2475.1	650.84	1428.88	5121.92	1235.96	2443.47	1016.73	6323.95	2161.52	10277.1	6833.06	3633.42
168322	73400.2	69.36	831.3	3151.38	693.24	640.24	6296.4	1867.72	2681.26	375.25	7233.24	926.6	2297.64	3268.52	1056.98
123922	76130.8	136.68	3051.84	5149.48	802.42	686.88	7517.52	3287.06	5736.19	1886.52	8599.94	779.82	666.66	9223.36	4268.1
101204	82314	91.8	2739.72	2206.92	564.98	1179.78	8714.26	2821.72	3990.29	887.96	12757.7	2402.6	11056.9	8462.4	3512.88
[truncated: 20,441 more rows]
